# Supplementary material for: Mitochondrial Akt Signaling Modulated Reprogramming of Somatic Cells
Source: PubMed Central journal article supplement (PMC6616364; doi:10.1038/s41598-019-46359-6), 2019-07-09
Supplement: 41598_2019_46359_MOESM1_ESM.pdf [file 41598_2019_46359_MOESM1_ESM.pdf]

# Mitochondrial Akt Signaling Modulated Reprogramming of Somatic Cells

## *Supplementary Information*

**Yu-Han Chen<sup>1,2,3</sup>, Ching-Chieh Su<sup>1,4</sup>, Wu Deng<sup>1,2</sup>, Leslie F. Lock<sup>2,5</sup>, Peter J. Donovan<sup>1,2,5</sup>,  
Matthew A Kayala<sup>6</sup>, Pierre Baldi<sup>6</sup>, Hsiao-Chen Lee<sup>1,2,7</sup>, Yumay Chen<sup>1,2</sup>, Ping H. Wang<sup>1,2,3</sup>**

1. UC Irvine Diabetes Center, University of California, Irvine, California
2. Sue & Bill Gross Stem Cell Research Center, University of California, Irvine, California,
3. Department of Physiology and Biophysics, University of California, Irvine, California
4. Graduate Institute of Applied Science and Engineering and School of Medicine, Fu Jen Catholic University, Taipei, Taiwan, and Cardinal Tien Hospital, New Taipei City, Taiwan
5. Departments of Biological Chemistry, and Developmental & Cell Biology, University of California, Irvine, California
6. Department of Computer Science, University of California, Irvine, California
7. Department of Plastic Surgery, Kaohsiung Medical University, Kaohsiung, Taiwan

**Figure S1.** Mito-Akt1 and Mito-dnAkt1 exclusively expressed in mitochondria. Mouse embryonic fibroblasts (MEF) were transduced with adenoviral vector with GFP (Ctrl), Mito-Akt1 or Mito-dnAkt1. Cells were harvested 48 hours post transduction. Mitochondria and cytoplasmic fractions were isolated as described in the method section. Both Mito-Akt1 and Mito-dnAkt1 were His-tag labelled. Actinin was used as cytoplasmic marker, while VDAC1 was used as mitochondrial marker. The original blots used to compile the data in Figure 1C.

Figure S1 (Fig 1 Supplementary Information)

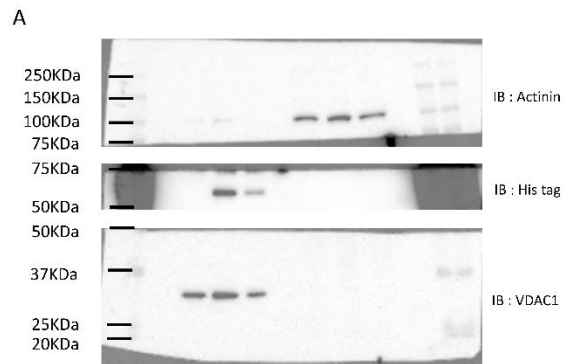

**Figure S2.** In vivo differentiation of mouse iPSCs (control and Mito-Akt1). Additional photos of teratoma HE stains.

Figure S2 (Fig 3 Supplementary Information)

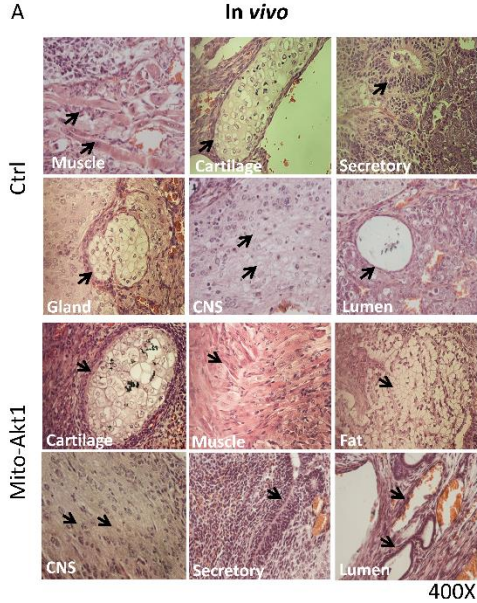

**Figure S3.** Akt translocation to mitochondria in human embryonic stem cells. The original blots used to compile Fig 5A.

Figure S3 (Fig 5 Supplementary Information)

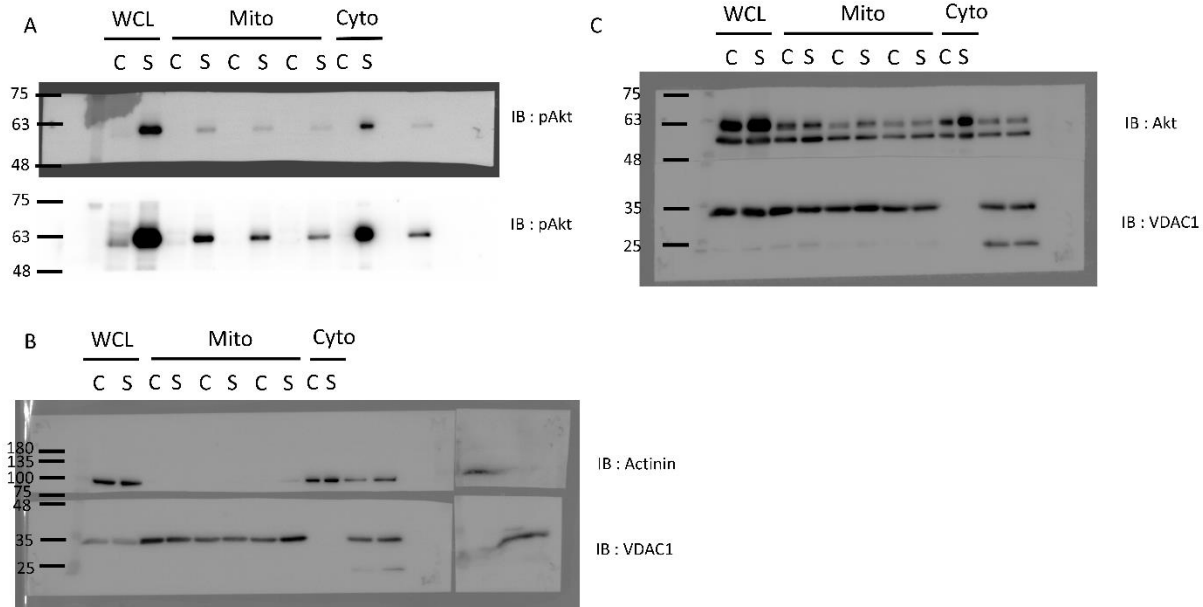

**Figure S4.** The effects of mitochondrial Akt in human embryonic stem cells. The original blots used to compile Fig 6B.

Figure S4 (Fig 6 Supplementary Information)

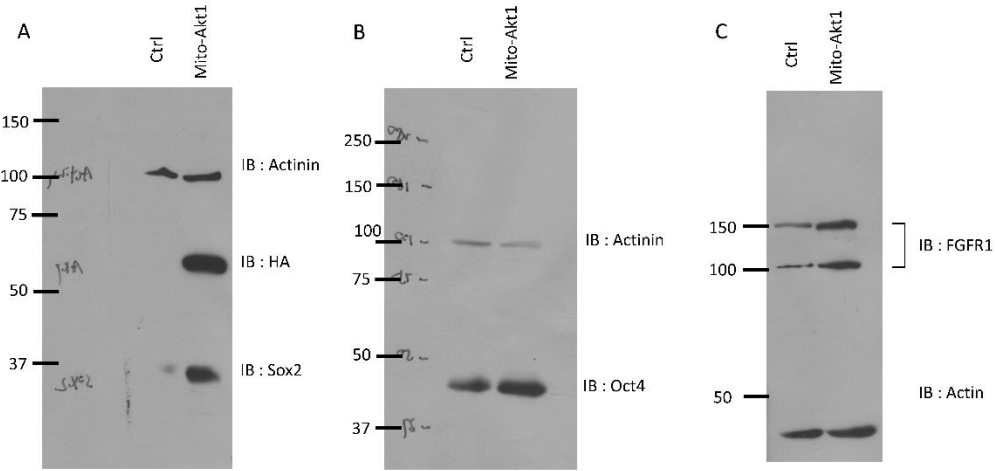

**Supplementary Table 1.** Complete list of the differentially expressed genes in the H9 cells transduced with Mito-Akt1.

| Functional Group 1 | Transcript Description                                                                                                                                                                                                                                                                                                                                                    | Gene Title                                | Bayes.In p  | Fold         |
|--------------------|---------------------------------------------------------------------------------------------------------------------------------------------------------------------------------------------------------------------------------------------------------------------------------------------------------------------------------------------------------------------------|-------------------------------------------|-------------|--------------|
| PMPCB              | Mitochondrial-processing peptidase subunit beta gene:ENSG00000105819 /// Homo sapiens cDNA FLJ78497 complete cds. /// Homo sapiens peptidase (mitochondrial processing) beta (PMPCB), nuclear gene encoding mitochondrial protein, mRNA.                                                                                                                                  | peptidase (mitochondrial processing) beta | 0.009160823 | 1.141642507  |
| MSRB2              | Methionine-R-sulfoxide reductase B2 gene:ENSG00000148450 /// Putative uncharacterized protein MSRB2 gene:ENSG00000148450 /// Putative uncharacterized protein MSRB2 gene:ENSG00000148450 /// Homo sapiens methionine sulfoxide reductase B2, mRNA (cDNA clone MGC:151080 IMAGE:40126022), complete cds. /// Homo sapiens methionine sulfoxide reductase B2 (MSRB2), mRNA. | methionine sulfoxide reductase B2         | 0.002684038 | 1.174899964  |
| RPS27L             | 40S ribosomal protein S27-like protein gene:ENSG00000185088 /// 13 kDa protein gene:ENSG00000185088 /// Homo sapiens ribosomal protein S27-like, mRNA (cDNA clone MGC:12175 IMAGE:3827362), complete cds. /// Homo sapiens ribosomal protein S27-like (RPS27L), mRNA.                                                                                                     | ribosomal protein S27-like                | 0.001063446 | -1.254328897 |

|                               |                                                                                                                                                                                                                                                                                                                                                                                                                                                                  |                                                                    |                       |                 |
|-------------------------------|------------------------------------------------------------------------------------------------------------------------------------------------------------------------------------------------------------------------------------------------------------------------------------------------------------------------------------------------------------------------------------------------------------------------------------------------------------------|--------------------------------------------------------------------|-----------------------|-----------------|
| COX17                         | cdna:known<br>chromosome:NCBI36:13:45963033:45<br>963393:1 gene:ENSG00000205105 ///<br>Cytochrome c oxidase copper<br>chaperone gene:ENSG00000138495<br>/// Homo sapiens COX17 cytochrome<br>c oxidase assembly homolog (S.<br>cerevisiae), mRNA (cDNA clone<br>MGC:104397 IMAGE:6739165),<br>complete cds. /// Homo sapiens<br>COX17 cytochrome c oxidase<br>assembly homolog (S. cerevisiae)<br>(COX17), nuclear gene encoding<br>mitochondrial protein, mRNA. | COX17 cytochrome c<br>oxidase assembly<br>homolog (S. cerevisiae)  | 0.000841<br>851       | 1.217993<br>343 |
| CISD1                         | CDGSH iron sulfur domain-containing<br>protein 1 gene:ENSG00000122873 ///<br>Homo sapiens CDGSH iron sulfur<br>domain 1, mRNA (cDNA clone<br>MGC:14684 IMAGE:4132410),<br>complete cds. /// Homo sapiens<br>CDGSH iron sulfur domain 1 (CISD1),<br>mRNA.                                                                                                                                                                                                         | CDGSH iron sulfur<br>domain 1                                      | 0.002452<br>111       | 1.259452<br>186 |
| <b>Functional<br/>Group 2</b> | <b>Transcript Description</b>                                                                                                                                                                                                                                                                                                                                                                                                                                    | <b>Gene Title</b>                                                  | <b>Bayes.In<br/>p</b> | <b>Fold</b>     |
| LETM1                         | LETM1 and EF-hand domain-<br>containing protein 1, mitochondrial<br>gene:ENSG00000168924 /// Homo<br>sapiens leucine zipper-EF-hand<br>containing transmembrane protein 1<br>(LETM1) mRNA, complete cds. ///<br>Homo sapiens leucine zipper-EF-hand<br>containing transmembrane protein 1<br>(LETM1), nuclear gene encoding<br>mitochondrial protein, mRNA.                                                                                                      | leucine zipper-EF-hand<br>containing<br>transmembrane<br>protein 1 | 0.001545<br>727       | 1.200565<br>539 |

|        |                                                                                                                                                                                                                                                                                                                                                                                                                                                                                                                                                                                                                                                                  |                                                                                          |                         |                         |
|--------|------------------------------------------------------------------------------------------------------------------------------------------------------------------------------------------------------------------------------------------------------------------------------------------------------------------------------------------------------------------------------------------------------------------------------------------------------------------------------------------------------------------------------------------------------------------------------------------------------------------------------------------------------------------|------------------------------------------------------------------------------------------|-------------------------|-------------------------|
| NDUFS7 | <p>cDNA FLJ45860 fis, clone OCBBF2036019, moderately similar to NADH-ubiquinone oxidoreductase 20 kDa subunit, mitochondrial<br/> gene:ENSG00000115286 /// NADH dehydrogenase [ubiquinone] iron-sulfur protein 7, mitochondrial<br/> gene:ENSG00000115286 /// Putative uncharacterized protein NDUFS7<br/> gene:ENSG00000115286 /// Homo sapiens NADH dehydrogenase (ubiquinone) Fe-S protein 7, 20kDa (NADH-coenzyme Q reductase), mRNA (cDNA clone MGC:14592 IMAGE:4276489), complete cds. /// Homo sapiens NADH dehydrogenase (ubiquinone) Fe-S protein 7, 20kDa (NADH-coenzyme Q reductase) (NDUFS7), nuclear gene encoding mitochondrial protein, mRNA.</p> | <p>NADH dehydrogenase (ubiquinone) Fe-S protein 7, 20kDa (NADH-coenzyme Q reductase)</p> | <p>0.000674<br/>651</p> | <p>1.312687<br/>464</p> |
| NDUFS8 | <p>NADH dehydrogenase [ubiquinone] iron-sulfur protein 8, mitochondrial<br/> gene:ENSG00000110717 /// Human mitochondrial NADH dehydrogenase-ubiquinone Fe-S protein 8, 23 kDa subunit precursor (NDUFS8) nuclear mRNA encoding mitochondrial protein, complete cds. /// Homo sapiens NADH dehydrogenase (ubiquinone) Fe-S protein 8, 23kDa (NADH-coenzyme Q reductase) (NDUFS8), mRNA.</p>                                                                                                                                                                                                                                                                      | <p>NADH dehydrogenase (ubiquinone) Fe-S protein 8, 23kDa (NADH-coenzyme Q reductase)</p> | <p>0.000865<br/>971</p> | <p>1.254163<br/>795</p> |



|         |                                                                                                                                                                                                                                                                                                                                                                                                                                                                                                                                                   |                                                               |                 |                 |
|---------|---------------------------------------------------------------------------------------------------------------------------------------------------------------------------------------------------------------------------------------------------------------------------------------------------------------------------------------------------------------------------------------------------------------------------------------------------------------------------------------------------------------------------------------------------|---------------------------------------------------------------|-----------------|-----------------|
| BCS1L   | Mitochondrial chaperone BCS1 gene:ENSG00000074582 /// Homo sapiens cDNA FLJ38891 fis, clone NHNPC2000062, highly similar to Mitochondrial chaperone BCS1. /// Homo sapiens BCS1-like (yeast) (BCS1L), transcript variant 1, mRNA. /// Homo sapiens BCS1-like (yeast) (BCS1L), nuclear gene encoding mitochondrial protein, transcript variant 2, mRNA.                          | BCS1-like (yeast)                                             | 0.006166<br>574 | 1.209016<br>657 |
| DNAJC19 | Homo sapiens DnaJ (Hsp40) homolog, subfamily C, member 19, mRNA (cDNA clone MGC:9296 IMAGE:3892297), complete cds.                                                                                                                                                                                                                                                                                                                                                                                                                                | DnaJ (Hsp40) homolog, subfamily C, member 19                  | 0.001214<br>5   | 1.203453<br>384 |
| TIMM9   | Mitochondrial import inner membrane translocase subunit Tim9 gene:ENSG00000100575 /// Mitochondrial import inner membrane translocase subunit Tim9 gene:ENSG00000100575 /// Mitochondrial import inner membrane translocase subunit Tim9 gene:ENSG00000100575 /// Homo sapiens translocase of inner mitochondrial membrane 9 homolog (yeast), mRNA (cDNA clone MGC:31874 IMAGE:4640518), complete cds. /// Homo sapiens translocase of inner mitochondrial membrane 9 homolog (yeast) (TIMM9), nuclear gene encoding mitochondrial protein, mRNA. | translocase of inner mitochondrial membrane 9 homolog (yeast) | 0.007083<br>968 | 1.208403<br>743 |

|        |                                                                                                                                                                                                                                                                                                                                                                                                              |                                                                |                 |                 |
|--------|--------------------------------------------------------------------------------------------------------------------------------------------------------------------------------------------------------------------------------------------------------------------------------------------------------------------------------------------------------------------------------------------------------------|----------------------------------------------------------------|-----------------|-----------------|
| TOMM20 | Mitochondrial import receptor subunit TOM20 homolog<br>gene:ENSG00000173726 /// Homo sapiens cDNA FLJ75096 complete cds, highly similar to Homo sapiens translocase of outer mitochondrial membrane 20 homolog (yeast) (TOMM20), mRNA. /// Homo sapiens translocase of outer mitochondrial membrane 20 homolog (yeast) (TOMM20), nuclear gene encoding mitochondrial protein, mRNA.                          | translocase of outer mitochondrial membrane 20 homolog (yeast) | 0.006951<br>31  | 1.147794<br>448 |
| AKAP1  | cDNA FLJ56047, highly similar to A kinase anchor protein 1, mitochondrial<br>gene:ENSG00000121057 /// Isoform 2 of A kinase anchor protein 1, mitochondrial<br>gene:ENSG00000121057 /// Homo sapiens A kinase (PRKA) anchor protein 1, mRNA (cDNA clone MGC:1807 IMAGE:3509111), complete cds. /// Homo sapiens A kinase (PRKA) anchor protein 1 (AKAP1), nuclear gene encoding mitochondrial protein, mRNA. | A kinase (PRKA) anchor protein 1                               | 0.008499<br>269 | 1.153290<br>063 |
| COX8A  | Cytochrome c oxidase polypeptide 8A, mitochondrial<br>gene:ENSG00000176340 /// Homo sapiens cytochrome c oxidase subunit 8A (ubiquitous), mRNA (cDNA clone MGC:70795 IMAGE:6018884), complete cds. /// Homo sapiens cytochrome c oxidase subunit 8A (ubiquitous) (COX8A), mRNA.                                                                                                                              | cytochrome c oxidase subunit 8A (ubiquitous)                   | 0.000106<br>919 | 1.543219<br>165 |
| CYC1   | Cytochrome c1, heme protein, mitochondrial<br>gene:ENSG00000179091 /// Homo sapiens cytochrome c-1, mRNA (cDNA clone MGC:21555 IMAGE:4157475), complete cds. /// Homo sapiens cytochrome c-1 (CYC1), mRNA.                                                                                                                                                                                                   | cytochrome c-1                                                 | 0.007302<br>705 | 1.175839<br>529 |

|          |                                                                                                                                                                                                                                                                                                                                                                                                                                                                        |                                                                                   |                 |                 |
|----------|------------------------------------------------------------------------------------------------------------------------------------------------------------------------------------------------------------------------------------------------------------------------------------------------------------------------------------------------------------------------------------------------------------------------------------------------------------------------|-----------------------------------------------------------------------------------|-----------------|-----------------|
| COX7C    | Cytochrome c oxidase subunit 7C, mitochondrial<br>gene:ENSG00000127184 /// Homo sapiens cDNA: FLJ22852 fis, clone KAT00780. /// Homo sapiens cytochrome c oxidase subunit VIIc (COX7C), nuclear gene encoding mitochondrial protein, mRNA.                                                                                                                                                                                                                             | cytochrome c oxidase subunit VIIc                                                 | 0.000769<br>468 | 1.233980<br>908 |
| SLC25A1  | Tricarboxylate transport protein, mitochondrial<br>gene:ENSG00000100075 /// Human citrate transporter protein mRNA, nuclear gene encoding mitochondrial protein, complete cds. /// Homo sapiens solute carrier family 25 (mitochondrial carrier; citrate transporter), member 1 (SLC25A1), nuclear gene encoding mitochondrial protein, mRNA.                                                                                                                          | solute carrier family 25 (mitochondrial carrier; citrate transporter), member 1   | 0.001141<br>429 | 1.205023<br>561 |
| SLC25A12 | cDNA FLJ33752 fis, clone BRCAN2000364, highly similar to Calcium-binding mitochondrial carrier protein Aralar1<br>gene:ENSG00000115840 /// Calcium-binding mitochondrial carrier protein Aralar1 gene:ENSG00000115840 /// Homo sapiens mRNA for mitochondrial aspartate-glutamate carrier protein (SLC25A12 gene). /// Homo sapiens solute carrier family 25 (mitochondrial carrier, Aralar), member 12 (SLC25A12), nuclear gene encoding mitochondrial protein, mRNA. | solute carrier family 25 (mitochondrial carrier, Aralar), member 12               | 0.007177<br>625 | 1.196424<br>029 |
| SLC25A15 | Mitochondrial ornithine transporter 1<br>gene:ENSG00000102743 /// Solute carrier family 25 (Mitochondrial carrier gene:ENSG00000102743 /// Homo sapiens ornithine transporter (ORNT1) mRNA, complete cds; nuclear gene for mitochondrial product. /// Homo sapiens solute carrier family 25 (mitochondrial carrier; ornithine transporter) member 15 (SLC25A15), nuclear gene encoding mitochondrial protein, mRNA.                                                    | solute carrier family 25 (mitochondrial carrier; ornithine transporter) member 15 | 0.006833<br>59  | 1.178797<br>763 |

|          |                                                                                                                                                                                                                                                                                                                                                                                                                                                                                                                                            |                                                                                    |                 |                 |
|----------|--------------------------------------------------------------------------------------------------------------------------------------------------------------------------------------------------------------------------------------------------------------------------------------------------------------------------------------------------------------------------------------------------------------------------------------------------------------------------------------------------------------------------------------------|------------------------------------------------------------------------------------|-----------------|-----------------|
| FECH     | ferrochelatase isoform a precursor<br>gene:ENSG00000066926 ///<br>Ferrochelatase, mitochondrial<br>gene:ENSG00000066926 /// Homo<br>sapiens ferrochelatase<br>(protoporphyrin), mRNA (cDNA clone<br>MGC:48846 IMAGE:6042757),<br>complete cds. /// Homo sapiens<br>ferrochelatase (protoporphyrin)<br>(FECH), nuclear gene encoding<br>mitochondrial protein, transcript<br>variant 1, mRNA. /// Homo sapiens<br>ferrochelatase (protoporphyrin)<br>(FECH), nuclear gene encoding<br>mitochondrial protein, transcript<br>variant 2, mRNA. | ferrochelatase<br>(protoporphyrin)                                                 | 0.000989<br>151 | 1.218840<br>193 |
| SLC25A20 | Mitochondrial carnitine/acylcarnitine<br>carrier protein<br>gene:ENSG00000178537 /// Homo<br>sapiens solute carrier family 25<br>(carnitine/acylcarnitine translocase),<br>member 20, mRNA (cDNA clone<br>MGC:1207 IMAGE:3050073),<br>complete cds. /// Homo sapiens<br>solute carrier family 25<br>(carnitine/acylcarnitine translocase),<br>member 20 (SLC25A20), nuclear gene<br>encoding mitochondrial protein,<br>mRNA.                                                                                                               | solute carrier family 25<br>(carnitine/acylcarnitine<br>translocase),<br>member 20 | 0.005186<br>068 | 1.238336<br>908 |
| NDUFA8   | NADH dehydrogenase [ubiquinone] 1<br>alpha subcomplex subunit 8<br>gene:ENSG00000119421 /// Homo<br>sapiens NADH:ubiquinone<br>oxidoreductase PGIV subunit mRNA,<br>nuclear gene encoding mitochondrial<br>protein, complete cds. /// Homo<br>sapiens NADH dehydrogenase<br>(ubiquinone) 1 alpha subcomplex, 8,<br>19kDa (NDUFA8), nuclear gene<br>encoding mitochondrial protein,<br>mRNA.                                                                                                                                                | NADH dehydrogenase<br>(ubiquinone) 1 alpha<br>subcomplex, 8, 19kDa                 | 0.007435<br>462 | 1.153044<br>821 |

|        |                                                                                                                                                                                                                                                                                                                                                                                                                                                                               |                                                                                   |             |             |
|--------|-------------------------------------------------------------------------------------------------------------------------------------------------------------------------------------------------------------------------------------------------------------------------------------------------------------------------------------------------------------------------------------------------------------------------------------------------------------------------------|-----------------------------------------------------------------------------------|-------------|-------------|
| SDHD   | Succinate dehydrogenase [ubiquinone] cytochrome b small subunit, mitochondrial<br>gene:ENSG00000204370 /// Homo sapiens full open reading frame cDNA clone RZPDo834C0116D for gene SDHD, succinate dehydrogenase complex, subunit D, integral membrane protein; complete cds, incl. stopcodon. /// Homo sapiens succinate dehydrogenase complex, subunit D, integral membrane protein (SDHD), nuclear gene encoding mitochondrial protein, mRNA.                              | succinate dehydrogenase complex, subunit D, integral membrane protein             | 1.37489E-06 | 1.493722854 |
| NDUFA1 | NADH dehydrogenase [ubiquinone] 1 alpha subcomplex subunit 1<br>gene:ENSG00000125356 /// Homo sapiens NADH dehydrogenase (ubiquinone) 1 alpha subcomplex, 1, 7.5kDa, mRNA (cDNA clone MGC:2066 IMAGE:3352028), complete cds. /// Homo sapiens NADH dehydrogenase (ubiquinone) 1 alpha subcomplex, 1, 7.5kDa (NDUFA1), nuclear gene encoding mitochondrial protein, mRNA.                                                                                                      | NADH dehydrogenase (ubiquinone) 1 alpha subcomplex, 1, 7.5kDa                     | 0.004081918 | 1.338054193 |
| NDUFS2 | NADH dehydrogenase [ubiquinone] iron-sulfur protein 2, mitochondrial<br>gene:ENSG00000158864 /// NADH dehydrogenase [ubiquinone] iron-sulfur protein 2, mitochondrial<br>gene:ENSG00000158864 /// Homo sapiens NADH dehydrogenase (ubiquinone) Fe-S protein 2, 49kDa (NADH-coenzyme Q reductase), mRNA (cDNA clone MGC:15322 IMAGE:4131430), complete cds. /// Homo sapiens NADH dehydrogenase (ubiquinone) Fe-S protein 2, 49kDa (NADH-coenzyme Q reductase) (NDUFS2), mRNA. | NADH dehydrogenase (ubiquinone) Fe-S protein 2, 49kDa (NADH-coenzyme Q reductase) | 0.000671587 | 1.224200737 |

|        |                                                                                                                                                                                                                                                                                                                                                                                                                                                                                                                                                                        |                                                                    |                         |                         |
|--------|------------------------------------------------------------------------------------------------------------------------------------------------------------------------------------------------------------------------------------------------------------------------------------------------------------------------------------------------------------------------------------------------------------------------------------------------------------------------------------------------------------------------------------------------------------------------|--------------------------------------------------------------------|-------------------------|-------------------------|
| NDUFB4 | <p>NADH dehydrogenase [ubiquinone] 1 beta subcomplex subunit 4<br/> gene:ENSG00000215727 ///<br/> cdna:known<br/> chromosome:NCBI36:4:43595231:43596125:1 gene:ENSG00000124399 ///<br/> NADH dehydrogenase [ubiquinone] 1 beta subcomplex subunit 4<br/> gene:ENSG00000065518 /// Homo sapiens NADH dehydrogenase (ubiquinone) 1 beta subcomplex, 4, 15kDa, mRNA (cDNA clone MGC:5105 IMAGE:3459215), complete cds. ///<br/> Homo sapiens NADH dehydrogenase (ubiquinone) 1 beta subcomplex, 4, 15kDa (NDUFB4), nuclear gene encoding mitochondrial protein, mRNA.</p> | <p>NADH dehydrogenase (ubiquinone) 1 beta subcomplex, 4, 15kDa</p> | <p>0.000603<br/>12</p>  | <p>1.247841<br/>764</p> |
| NDUFV2 | <p>cdna:known<br/> chromosome:NCBI36:19:58419036:58419949:-1 gene:ENSG00000188699 ///<br/> NADH dehydrogenase [ubiquinone] flavoprotein 2, mitochondrial<br/> gene:ENSG00000178127 /// 28 kDa protein gene:ENSG00000178127 ///<br/> Human nuclear-encoded mitochondrial NADH-ubiquinone reductase 24Kd subunit mRNA, complete cds. /// Homo sapiens NADH dehydrogenase (ubiquinone) flavoprotein 2, 24kDa (NDUFV2), nuclear gene encoding mitochondrial protein, mRNA.</p>                                                                                             | <p>NADH dehydrogenase (ubiquinone) flavoprotein 2, 24kDa</p>       | <p>0.004499<br/>827</p> | <p>1.218647<br/>614</p> |

|        |                                                                                                                                                                                                                                                                                                                                                                                                                                                                                                                                                                                                          |                                                             |                 |                 |
|--------|----------------------------------------------------------------------------------------------------------------------------------------------------------------------------------------------------------------------------------------------------------------------------------------------------------------------------------------------------------------------------------------------------------------------------------------------------------------------------------------------------------------------------------------------------------------------------------------------------------|-------------------------------------------------------------|-----------------|-----------------|
| NDUFA3 | Putative uncharacterized protein NDUFA3 (Fragment)<br>gene:ENSG00000170906 /// Putative uncharacterized protein NDUFA3<br>gene:ENSG00000170906 /// NADH dehydrogenase [ubiquinone] 1 alpha subcomplex subunit 3<br>gene:ENSG00000170906 /// Putative uncharacterized protein NDUFA3<br>gene:ENSG00000170906 /// Putative uncharacterized protein NDUFA3<br>gene:ENSG00000170906 /// Homo sapiens NADH:ubiquinone oxidoreductase B9 subunit mRNA, nuclear gene encoding mitochondrial protein, complete cds. /// Homo sapiens NADH dehydrogenase (ubiquinone) 1 alpha subcomplex, 3, 9kDa (NDUFA3), mRNA. | NADH dehydrogenase (ubiquinone) 1 alpha subcomplex, 3, 9kDa | 0.001764<br>802 | 1.219098<br>599 |
| NDUFA2 | NADH dehydrogenase [ubiquinone] 1 alpha subcomplex subunit 2<br>gene:ENSG00000131495 /// Homo sapiens NADH-ubiquinone oxidoreductase subunit CI-B8 mRNA, complete cds. /// Homo sapiens NADH dehydrogenase (ubiquinone) 1 alpha subcomplex, 2, 8kDa (NDUFA2), mRNA.                                                                                                                                                                                                                                                                                                                                      | NADH dehydrogenase (ubiquinone) 1 alpha subcomplex, 2, 8kDa | 0.002760<br>904 | 1.222661<br>835 |
| NDUFB2 | NADH dehydrogenase [ubiquinone] 1 beta subcomplex subunit 2, mitochondrial<br>gene:ENSG00000090266 /// NADH-ubiquinone oxidoreductase AGGG subunit gene:ENSG00000090266 /// Homo sapiens NADH dehydrogenase (ubiquinone) 1 beta subcomplex, 2, 8kDa, mRNA (cDNA clone MGC:70788 IMAGE:6064434), complete cds. /// Homo sapiens NADH dehydrogenase (ubiquinone) 1 beta subcomplex, 2, 8kDa (NDUFB2), nuclear gene encoding mitochondrial protein, mRNA.                                                                                                                                                   | NADH dehydrogenase (ubiquinone) 1 beta subcomplex, 2, 8kDa  | 0.009293<br>967 | 1.175886<br>258 |

|        |                                                                                                                                                                                                                                                                                                                                                                                                                                                                                                                                                                                                                       |                                                                                          |                         |                         |
|--------|-----------------------------------------------------------------------------------------------------------------------------------------------------------------------------------------------------------------------------------------------------------------------------------------------------------------------------------------------------------------------------------------------------------------------------------------------------------------------------------------------------------------------------------------------------------------------------------------------------------------------|------------------------------------------------------------------------------------------|-------------------------|-------------------------|
| NDUFC1 | <p>NADH dehydrogenase [ubiquinone] 1 subunit C1, mitochondrial<br/> gene:ENSG00000109390 /// NADH dehydrogenase [ubiquinone] 1 subunit C1, mitochondrial<br/> gene:ENSG00000109390 /// NADH dehydrogenase [ubiquinone] 1 subunit C1, mitochondrial<br/> gene:ENSG00000109390 /// NADH dehydrogenase [ubiquinone] 1 subunit C1, mitochondrial<br/> gene:ENSG00000109390 /// Homo sapiens NADH dehydrogenase (ubiquinone) 1, subcomplex unknown, 1, 6kDa, mRNA (cDNA clone MGC:117464 IMAGE:5557684), complete cds. /// Homo sapiens NADH dehydrogenase (ubiquinone) 1, subcomplex unknown, 1, 6kDa (NDUFC1), mRNA.</p> | <p>NADH dehydrogenase (ubiquinone) 1, subcomplex unknown, 1, 6kDa</p>                    | <p>0.003609<br/>495</p> | <p>1.182048<br/>219</p> |
| NDUFS6 | <p>NADH dehydrogenase [ubiquinone] iron-sulfur protein 6, mitochondrial<br/> gene:ENSG00000145494 /// Homo sapiens NADH:ubiquinone oxidoreductase NDUFS6 subunit mRNA, nuclear gene encoding mitochondrial protein, complete cds. /// Homo sapiens NADH dehydrogenase (ubiquinone) Fe-S protein 6, 13kDa (NADH-coenzyme Q reductase) (NDUFS6), mRNA.</p>                                                                                                                                                                                                                                                              | <p>NADH dehydrogenase (ubiquinone) Fe-S protein 6, 13kDa (NADH-coenzyme Q reductase)</p> | <p>0.002664<br/>039</p> | <p>1.174295<br/>423</p> |



|         |                                                                                                                                                                                                                                                                                                                                                                                                                                                                                                                                                                                                                                                                                                                                                        |                                                                  |                 |                 |
|---------|--------------------------------------------------------------------------------------------------------------------------------------------------------------------------------------------------------------------------------------------------------------------------------------------------------------------------------------------------------------------------------------------------------------------------------------------------------------------------------------------------------------------------------------------------------------------------------------------------------------------------------------------------------------------------------------------------------------------------------------------------------|------------------------------------------------------------------|-----------------|-----------------|
| NDUFB6  | NADH dehydrogenase [ubiquinone] 1 beta subcomplex subunit 6<br>gene:ENSG00000165264 /// NADH dehydrogenase (ubiquinone) 1 beta subcomplex, 6, 17kDa isoform 2<br>gene:ENSG00000165264 /// Homo sapiens cDNA FLJ76517 complete cds, highly similar to Homo sapiens NADH dehydrogenase (ubiquinone) 1 beta subcomplex, 6, 17kDa (NDUFB6), nuclear gene encoding mitochondrial protein, transcript variant 1, mRNA.<br>/// Homo sapiens NADH dehydrogenase (ubiquinone) 1 beta subcomplex, 6, 17kDa (NDUFB6), nuclear gene encoding mitochondrial protein, transcript variant 2, mRNA.<br>/// Homo sapiens NADH dehydrogenase (ubiquinone) 1 beta subcomplex, 6, 17kDa (NDUFB6), nuclear gene encoding mitochondrial protein, transcript variant 1, mRNA. | NADH dehydrogenase (ubiquinone) 1 beta subcomplex, 6, 17kDa      | 0.004457<br>401 | 1.397064<br>706 |
| NDUFB10 | NADH dehydrogenase [ubiquinone] 1 beta subcomplex subunit 10<br>gene:ENSG00000140990 /// Homo sapiens NADH dehydrogenase (ubiquinone) 1 beta subcomplex, 10, 22kDa, mRNA (cDNA clone MGC:4153 IMAGE:3030207), complete cds. /// Homo sapiens NADH dehydrogenase (ubiquinone) 1 beta subcomplex, 10, 22kDa (NDUFB10), mRNA.                                                                                                                                                                                                                                                                                                                                                                                                                             | NADH dehydrogenase (ubiquinone) 1 beta subcomplex, 10, 22kDa     | 0.004386<br>163 | 1.154936<br>832 |
| FIS1    | Mitochondrial fission 1 protein<br>gene:ENSG00000214253 /// Homo sapiens CGI-135 protein mRNA, complete cds. /// Homo sapiens fission 1 (mitochondrial outer membrane) homolog (S. cerevisiae) (FIS1), nuclear gene encoding mitochondrial protein, mRNA.                                                                                                                                                                                                                                                                                                                                                                                                                                                                                              | fission 1 (mitochondrial outer membrane) homolog (S. cerevisiae) | 0.004805<br>165 | 1.187836<br>666 |

|          |                                                                                                                                                                                                                                                                                                                                                                                                                                                                                         |                                                                                         |                 |                      |
|----------|-----------------------------------------------------------------------------------------------------------------------------------------------------------------------------------------------------------------------------------------------------------------------------------------------------------------------------------------------------------------------------------------------------------------------------------------------------------------------------------------|-----------------------------------------------------------------------------------------|-----------------|----------------------|
| SLC25A11 | Mitochondrial 2-oxoglutarate/malate carrier protein<br>gene:ENSG00000108528 /// Homo sapiens solute carrier family 25 (mitochondrial carrier; oxoglutarate carrier), member 11, mRNA (cDNA clone MGC:2449 IMAGE:2960933), complete cds. /// Homo sapiens solute carrier family 25 (mitochondrial carrier; oxoglutarate carrier), member 11 (SLC25A11), nuclear gene encoding mitochondrial protein, mRNA.                                                                               | solute carrier family 25 (mitochondrial carrier; oxoglutarate carrier), member 11       | 0.009551<br>499 | 1.150444<br>011      |
| SLC25A16 | Graves disease carrier protein<br>gene:ENSG00000122912 /// 9 kDa protein gene:ENSG00000122912 /// Homo sapiens solute carrier family 25 (mitochondrial carrier; Graves disease autoantigen), member 16, mRNA (cDNA clone MGC:39851 IMAGE:5241247), complete cds. /// Homo sapiens solute carrier family 25 (mitochondrial carrier; Graves disease autoantigen), member 16 (SLC25A16), nuclear gene encoding mitochondrial protein, mRNA.                                                | solute carrier family 25 (mitochondrial carrier; Graves disease autoantigen), member 16 | 0.000186<br>041 | -<br>1.364807<br>187 |
| ETFDH    | Isoform 1 of Electron transfer flavoprotein-ubiquinone oxidoreductase, mitochondrial<br>gene:ENSG00000171503 /// Isoform 2 of Electron transfer flavoprotein-ubiquinone oxidoreductase, mitochondrial<br>gene:ENSG00000171503 /// Homo sapiens electron-transferring-flavoprotein dehydrogenase, mRNA (cDNA clone MGC:20062 IMAGE:3938660), complete cds. /// Homo sapiens electron-transferring-flavoprotein dehydrogenase (ETFDH), nuclear gene encoding mitochondrial protein, mRNA. | electron-transferring-flavoprotein dehydrogenase                                        | 0.000685<br>736 | 1.353307<br>611      |

|          |                                                                                                                                                                                                                                                                                                                                                                                                                                                                                                                                                                                   |                                                             |                 |                 |
|----------|-----------------------------------------------------------------------------------------------------------------------------------------------------------------------------------------------------------------------------------------------------------------------------------------------------------------------------------------------------------------------------------------------------------------------------------------------------------------------------------------------------------------------------------------------------------------------------------|-------------------------------------------------------------|-----------------|-----------------|
| TOMM34   | Mitochondrial import receptor subunit TOM34<br>gene:ENSG00000025772 /// cDNA FLJ26027 fis, clone PNC04328, highly similar to Homo sapiens translocase of outer mitochondrial membrane 34<br>gene:ENSG00000025772 /// Homo sapiens translocase of outer mitochondrial membrane 34, mRNA (cDNA clone MGC:3515 IMAGE:2960090), complete cds. /// Homo sapiens translocase of outer mitochondrial membrane 34 (TOMM34), nuclear gene encoding mitochondrial protein, mRNA.                                                                                                            | translocase of outer mitochondrial membrane 34              | 0.006754<br>355 | 1.167816<br>537 |
| NIPSNAP1 | Protein NipSnap homolog 1<br>gene:ENSG00000184117 /// Homo sapiens mRNA for NIPSNAP1 protein. /// Homo sapiens nipsnap homolog 1 (C. elegans) (NIPSNAP1), mRNA.                                                                                                                                                                                                                                                                                                                                                                                                                   | nipsnap homolog 1 (C. elegans)                              | 0.001274<br>444 | 1.209693<br>015 |
| SLC27A3  | Isoform 1 of Long-chain fatty acid transport protein 3<br>gene:ENSG00000143554 /// Isoform 1 of Long-chain fatty acid transport protein 3<br>gene:ENSG00000143554 /// 11 kDa protein<br>gene:ENSG00000143554 /// Solute carrier family 27 (Fatty acid transporter), member 3<br>gene:ENSG00000143554 /// Putative uncharacterized protein<br>gene:ENSG00000216243 /// Homo sapiens cDNA FLJ43112 fis, clone CTONG2028124, weakly similar to Homo sapiens VLCS-H1 protein (VLCS-H1). /// Homo sapiens solute carrier family 27 (fatty acid transporter), member 3 (SLC27A3), mRNA. | solute carrier family 27 (fatty acid transporter), member 3 | 0.002911<br>584 | 1.206127<br>894 |

|                               |                                                                                                                                                                                                                                                                                                                                                                                            |                                                                            |                       |                      |
|-------------------------------|--------------------------------------------------------------------------------------------------------------------------------------------------------------------------------------------------------------------------------------------------------------------------------------------------------------------------------------------------------------------------------------------|----------------------------------------------------------------------------|-----------------------|----------------------|
| C17orf61                      | UPF0451 protein C17orf61<br>gene:ENSG00000205544 /// Homo sapiens cDNA FLJ31260 fis, clone KIDNE2005854, highly similar to Phospholipid scramblase 3. /// Homo sapiens cDNA FLJ77856 complete cds, highly similar to Homo sapiens phospholipid scramblase 3 (PLSCR3), mRNA. /// Homo sapiens chromosome 17 open reading frame 61, mRNA (cDNA clone MGC:40107 IMAGE:5418259), complete cds. | phospholipid<br>scramblase 3 ///<br>chromosome 17 open<br>reading frame 61 | 0.001099<br>691       | 1.276122<br>626      |
| CCDC56                        | Coiled-coil domain-containing protein 56 gene:ENSG00000183978 /// Homo sapiens mRNA for HSPC009 variant, clone: PNC06538. /// Homo sapiens coiled-coil domain containing 56 (CCDC56), mRNA.                                                                                                                                                                                                | coiled-coil domain<br>containing 56                                        | 0.003281<br>488       | 1.232223<br>987      |
| <b>Functional<br/>Group 3</b> | <b>Transcript Description</b>                                                                                                                                                                                                                                                                                                                                                              | <b>Gene Title</b>                                                          | <b>Bayes.In<br/>p</b> | <b>Fold</b>          |
| THEM2                         | Thioesterase superfamily member 2 gene:ENSG00000112304 /// Homo sapiens uncharacterized hypothalamus protein HT012 mRNA, complete cds. /// Homo sapiens thioesterase superfamily member 2 (THEM2), mRNA.                                                                                                                                                                                   | thioesterase<br>superfamily member 2                                       | 0.009507<br>814       | 1.144254<br>435      |
| DRAM                          | Damage-regulated autophagy modulator gene:ENSG00000136048 /// Homo sapiens damage-regulated autophagy modulator, mRNA (cDNA clone MGC:21716 IMAGE:4474297), complete cds. /// Homo sapiens damage-regulated autophagy modulator (DRAM), mRNA.                                                                                                                                              | damage-regulated<br>autophagy modulator                                    | 0.000780<br>827       | -<br>1.247606<br>428 |
| FKTN                          | Fukutin gene:ENSG00000106692 /// 26 kDa protein<br>gene:ENSG00000106692 /// 27 kDa protein<br>gene:ENSG00000106692 /// Homo sapiens FCMD mRNA for fukutin, complete cds. /// Homo sapiens fukutin (FKTN), transcript variant 2, mRNA. /// Homo sapiens fukutin (FKTN), transcript variant 1, mRNA.                                                                                         | fukutin                                                                    | 0.003004<br>349       | 1.219800<br>207      |

|         |                                                                                                                                                                                                                                                                                                                                                                                                                                                                                                                                                                                                                                                                                                                                                                            |                                                                                           |                          |                          |
|---------|----------------------------------------------------------------------------------------------------------------------------------------------------------------------------------------------------------------------------------------------------------------------------------------------------------------------------------------------------------------------------------------------------------------------------------------------------------------------------------------------------------------------------------------------------------------------------------------------------------------------------------------------------------------------------------------------------------------------------------------------------------------------------|-------------------------------------------------------------------------------------------|--------------------------|--------------------------|
| ERGIC1  | <p>cdna:known<br/> chromosome:NCBI36:5:172193928:17<br/> 2258194:1 gene:ENSG00000113719<br/> /// 35 kDa protein<br/> gene:ENSG00000113719 /// Isoform<br/> 1 of Endoplasmic reticulum-Golgi<br/> intermediate compartment protein 1<br/> gene:ENSG00000113719 ///<br/> cdna:known<br/> chromosome:NCBI36:5:172194020:17<br/> 2280180:1 gene:ENSG00000113719<br/> /// Isoform 3 of Endoplasmic<br/> reticulum-Golgi intermediate<br/> compartment protein 1<br/> gene:ENSG00000113719 /// Homo<br/> sapiens endoplasmic reticulum-golgi<br/> intermediate compartment (ERGIC) 1,<br/> mRNA (cDNA clone MGC:16233<br/> IMAGE:3677787), complete cds. ///<br/> Homo sapiens endoplasmic<br/> reticulum-golgi intermediate<br/> compartment (ERGIC) 1 (ERGIC1),<br/> mRNA.</p> | <p>endoplasmic<br/> reticulum-golgi<br/> intermediate<br/> compartment (ERGIC)<br/> 1</p> | <p>0.000491<br/> 703</p> | <p>1.243551<br/> 427</p> |
| TMED3   | <p>Transmembrane emp24 domain-<br/> containing protein 3<br/> gene:ENSG00000166557 /// Homo<br/> sapiens cDNA FLJ75946 complete cds,<br/> highly similar to Homo sapiens<br/> transmembrane emp24 protein<br/> transport domain containing 3<br/> (TMED3), mRNA. /// Homo sapiens<br/> transmembrane emp24 protein<br/> transport domain containing 3<br/> (TMED3), mRNA.</p>                                                                                                                                                                                                                                                                                                                                                                                              | <p>transmembrane<br/> emp24 protein<br/> transport domain<br/> containing 3</p>           | <p>0.009634<br/> 817</p> | <p>1.172139<br/> 107</p> |
| SVIP    | <p>Small VCP/p97-interacting protein<br/> gene:ENSG00000198168 /// Homo<br/> sapiens mRNA; cDNA<br/> DKFZp313A2432 (from clone<br/> DKFZp313A2432). /// Homo sapiens<br/> small VCP/p97-interacting protein<br/> (SVIP), mRNA.</p>                                                                                                                                                                                                                                                                                                                                                                                                                                                                                                                                         | <p>small VCP/p97-<br/> interacting protein</p>                                            | <p>0.004605<br/> 461</p> | <p>1.268457<br/> 487</p> |
| SLC35A5 | <p>Probable UDP-sugar transporter<br/> protein SLC35A5<br/> gene:ENSG00000138459 /// Homo<br/> sapiens clone DNA23334 SLC35A5<br/> (UNQ164) mRNA, complete cds. ///<br/> Homo sapiens solute carrier family<br/> 35, member A5 (SLC35A5), mRNA.</p>                                                                                                                                                                                                                                                                                                                                                                                                                                                                                                                        | <p>solute carrier family<br/> 35, member A5</p>                                           | <p>0.001150<br/> 165</p> | <p>1.208143<br/> 764</p> |

|        |                                                                                                                                                                                                                                                                                                                                                                                                                                                                                                                                                                                                       |                                                                                                        |                 |                      |
|--------|-------------------------------------------------------------------------------------------------------------------------------------------------------------------------------------------------------------------------------------------------------------------------------------------------------------------------------------------------------------------------------------------------------------------------------------------------------------------------------------------------------------------------------------------------------------------------------------------------------|--------------------------------------------------------------------------------------------------------|-----------------|----------------------|
| MANBAL | <p>Protein MANBAL<br/> gene:ENSG00000101363 /// Protein<br/> MANBAL gene:ENSG00000101363 ///<br/> Mannosidase, beta A, lysosomal-like<br/> gene:ENSG00000101363 /// Protein<br/> MANBAL gene:ENSG00000101363 ///<br/> Protein MANBAL<br/> gene:ENSG00000101363 /// Protein<br/> MANBAL gene:ENSG00000101363 ///<br/> Homo sapiens cDNA: FLJ23055 fis,<br/> clone LNG03262. /// Homo sapiens<br/> mannosidase, beta A, lysosomal-like<br/> (MANBAL), transcript variant 2,<br/> mRNA. /// Homo sapiens<br/> mannosidase, beta A, lysosomal-like<br/> (MANBAL), transcript variant 1,<br/> mRNA.</p>    | mannosidase, beta A,<br>lysosomal-like                                                                 | 9.61227E<br>-05 | 1.298557<br>075      |
| LAPTM5 | <p>Lysosomal-associated<br/> transmembrane protein 5<br/> gene:ENSG00000162511 /// Homo<br/> sapiens cDNA FLJ61683 complete cds,<br/> moderately similar to Lysosomal-<br/> associated multitransmembrane<br/> protein. /// Human lysosomal-<br/> associated multitransmembrane<br/> protein (LAPTM5) mRNA, complete<br/> cds. /// Homo sapiens lysosomal<br/> multispanning membrane protein 5<br/> (LAPTM5), mRNA.</p>                                                                                                                                                                              | actin filament<br>associated protein 1-<br>like 1 /// lysosomal<br>multispanning<br>membrane protein 5 | 0.000670<br>384 | -<br>1.424435<br>353 |
| INSIG1 | <p>insulin induced gene 1 isoform 2<br/> gene:ENSG00000186480 /// Insulin-<br/> induced gene 1 protein<br/> gene:ENSG00000186480 /// insulin<br/> induced gene 1 isoform 3<br/> gene:ENSG00000186480 /// Homo<br/> sapiens insulin induced gene 1, mRNA<br/> (cDNA clone MGC:1405<br/> IMAGE:3546928), complete cds. ///<br/> Homo sapiens insulin induced gene 1<br/> (INSIG1), transcript variant 1, mRNA.<br/> /// Homo sapiens insulin induced<br/> gene 1 (INSIG1), transcript variant 2,<br/> mRNA. /// Homo sapiens insulin<br/> induced gene 1 (INSIG1), transcript<br/> variant 3, mRNA.</p> | insulin induced gene 1                                                                                 | 0.000115<br>835 | 1.293557<br>142      |

|          |                                                                                                                                                                                                                                                                                                                                                                                                                                                                                                                                                                                                                |                                                                  |                 |                      |
|----------|----------------------------------------------------------------------------------------------------------------------------------------------------------------------------------------------------------------------------------------------------------------------------------------------------------------------------------------------------------------------------------------------------------------------------------------------------------------------------------------------------------------------------------------------------------------------------------------------------------------|------------------------------------------------------------------|-----------------|----------------------|
| IER3IP1  | Homo sapiens PRO2309 mRNA, complete cds.                                                                                                                                                                                                                                                                                                                                                                                                                                                                                                                                                                       | immediate early response 3 interacting protein 1                 | 0.416335<br>366 | -<br>1.125829<br>568 |
| TOR1AIP2 | Torsin-1A-interacting protein 2 gene:ENSG00000169905 /// IFRG15 protein gene:ENSG00000218839 /// Homo sapiens cDNA FLJ77012 complete cds, highly similar to Homo sapiens interferon responsive gene 15 (IFRG15), mRNA. /// Homo sapiens torsin A interacting protein 2, mRNA (cDNA clone MGC:126581 IMAGE:8069038), complete cds. /// Homo sapiens torsin A interacting protein 2 (TOR1AIP2), mRNA.                                                                                                                                                                                                            | interferon responsive gene 15 /// torsin A interacting protein 2 | 0.001893<br>375 | -<br>1.192769<br>275 |
| SEC22C   | Isoform 2 of Vesicle-trafficking protein SEC22c gene:ENSG00000093183 /// Isoform 3 of Vesicle-trafficking protein SEC22c gene:ENSG00000093183 /// Isoform 1 of Vesicle-trafficking protein SEC22c gene:ENSG00000093183 /// Homo sapiens cDNA FLJ57251 complete cds, highly similar to Homo sapiens SEC22 vesicle trafficking protein-like 3, transcript variant 2, mRNA. /// Homo sapiens SEC22 vesicle trafficking protein homolog C (S. cerevisiae) (SEC22C), transcript variant 1, mRNA. /// Homo sapiens SEC22 vesicle trafficking protein homolog C (S. cerevisiae) (SEC22C), transcript variant 2, mRNA. | SEC22 vesicle trafficking protein homolog C (S. cerevisiae)      | 0.003178<br>567 | 1.201000<br>039      |
| CCDC3    | Novel protein gene:ENSG00000151468 /// Coiled-coil domain-containing protein 3 gene:ENSG00000151468 /// Homo sapiens coiled-coil domain containing 3, mRNA (cDNA clone MGC:59716 IMAGE:6302570), complete cds. /// Homo sapiens coiled-coil domain containing 3 (CCDC3), mRNA.                                                                                                                                                                                                                                                                                                                                 | coiled-coil domain containing 3                                  | 9.73491E<br>-06 | -<br>1.458815<br>22  |

|               |                                                                                                                                                                                                                                                                                                                                                                                                                                |                                                                   |                 |                      |
|---------------|--------------------------------------------------------------------------------------------------------------------------------------------------------------------------------------------------------------------------------------------------------------------------------------------------------------------------------------------------------------------------------------------------------------------------------|-------------------------------------------------------------------|-----------------|----------------------|
| TMEM126A      | Transmembrane protein 126A<br>gene:ENSG00000171202 /// Homo sapiens transmembrane protein 126A, mRNA (cDNA clone MGC:14138 IMAGE:3948518), complete cds. /// Homo sapiens transmembrane protein 126A (TMEM126A), mRNA.                                                                                                                                                                                                         | transmembrane protein 126A                                        | 0.003177<br>148 | 1.274946<br>674      |
| C17orf61      | UPF0451 protein C17orf61<br>gene:ENSG00000205544 /// Homo sapiens cDNA FLJ31260 fis, clone KIDNE2005854, highly similar to Phospholipid scramblase 3. /// Homo sapiens cDNA FLJ77856 complete cds, highly similar to Homo sapiens phospholipid scramblase 3 (PLSCR3), mRNA. /// Homo sapiens chromosome 17 open reading frame 61, mRNA (cDNA clone MGC:40107 IMAGE:5418259), complete cds.                                     | phospholipid scramblase 3 /// chromosome 17 open reading frame 61 | 0.001099<br>691 | 1.276122<br>626      |
| DKFZP564O0823 | Protein PARM-1<br>gene:ENSG00000169116 /// Homo sapiens clone DNA92223 VYKT1879 (UNQ1879) mRNA, complete cds. /// Homo sapiens DKFZP564O0823 protein (DKFZP564O0823), mRNA.                                                                                                                                                                                                                                                    | DKFZP564O0823 protein                                             | 5.61324E<br>-05 | -<br>1.348721<br>612 |
| C6orf162      | Uncharacterized protein C6orf162<br>gene:ENSG00000111850 /// Uncharacterized protein C6orf162<br>gene:ENSG00000111850 /// Homo sapiens chromosome 6 open reading frame 162, mRNA (cDNA clone MGC:88247 IMAGE:6452586), complete cds. /// Homo sapiens chromosome 6 open reading frame 162 (C6orf162), transcript variant 2, mRNA. /// Homo sapiens chromosome 6 open reading frame 162 (C6orf162), transcript variant 1, mRNA. | chromosome 6 open reading frame 162                               | 0.003066<br>727 | 1.199326<br>745      |
| PXMP2         | Homo sapiens peroxisomal membrane protein 2, 22kDa, mRNA (cDNA clone IMAGE:4098463), complete cds.                                                                                                                                                                                                                                                                                                                             | peroxisomal membrane protein 2, 22kDa                             | 0.121401<br>801 | 1.149864<br>533      |



|          |                                                                                                                                                                                                                                                                                                                                                                                                                                                                                                                                                                                           |                                                            |                 |                 |
|----------|-------------------------------------------------------------------------------------------------------------------------------------------------------------------------------------------------------------------------------------------------------------------------------------------------------------------------------------------------------------------------------------------------------------------------------------------------------------------------------------------------------------------------------------------------------------------------------------------|------------------------------------------------------------|-----------------|-----------------|
| SMCR7L   | Putative uncharacterized protein DKFZp434F0116<br>gene:ENSG00000100335 /// Smith-Magenis syndrome chromosome region candidate gene 7 protein-like<br>gene:ENSG00000100335 /// Putative uncharacterized protein DKFZp434F0116<br>gene:ENSG00000100335 /// Smith-Magenis syndrome chromosome region candidate gene 7 protein-like<br>gene:ENSG00000100335 /// Homo sapiens Smith-Magenis syndrome chromosome region, candidate 7-like, mRNA (cDNA clone MGC:15774 IMAGE:3502711), complete cds. /// Homo sapiens Smith-Magenis syndrome chromosome region, candidate 7-like (SMCR7L), mRNA. | Smith-Magenis syndrome chromosome region, candidate 7-like | 0.003381<br>395 | 1.214924<br>348 |
| C9orf46  | Transmembrane protein C9orf46<br>gene:ENSG00000107020 /// Homo sapiens uncharacterized hematopoietic stem/progenitor cells protein MDS030 mRNA, complete cds. /// Homo sapiens AD025 mRNA, complete cds.                                                                                                                                                                                                                                                                                                                                                                                  | chromosome 9 open reading frame 46                         | 0.003702<br>152 | 1.261456<br>637 |
| STARD3NL | Isoform 1 of MLN64 N-terminal domain homolog<br>gene:ENSG00000010270 /// Isoform 1 of MLN64 N-terminal domain homolog<br>gene:ENSG00000010270 /// Homo sapiens cDNA FLJ34260 fis, clone FEBRA2000782, moderately similar to MLN 64 PROTEIN. /// Homo sapiens STARD3 N-terminal like (STARD3NL), mRNA.                                                                                                                                                                                                                                                                                     | STARD3 N-terminal like                                     | 0.000773<br>235 | 1.251229<br>806 |
| SCAMP2   | Secretory carrier-associated membrane protein 2<br>gene:ENSG00000140497 /// Homo sapiens cDNA FLJ39475 fis, clone PROST2013121, highly similar to SECRETORY CARRIER-ASSOCIATED MEMBRANE PROTEIN 2. /// Homo sapiens secretory carrier membrane protein 2 (SCAMP2), mRNA.                                                                                                                                                                                                                                                                                                                  | secretory carrier membrane protein 2                       | 0.001183<br>903 | 1.201401<br>381 |

|          |                                                                                                                                                                                                                                                                                                                                                                                                                                                                                                                                                                                              |                                      |             |              |
|----------|----------------------------------------------------------------------------------------------------------------------------------------------------------------------------------------------------------------------------------------------------------------------------------------------------------------------------------------------------------------------------------------------------------------------------------------------------------------------------------------------------------------------------------------------------------------------------------------------|--------------------------------------|-------------|--------------|
| SLC44A5  | Isoform 2 of Choline transporter-like protein 5 gene:ENSG00000137968 /// Isoform 2 of Choline transporter-like protein 5 gene:ENSG00000137968 /// Isoform 1 of Choline transporter-like protein 5 gene:ENSG00000137968 /// Putative uncharacterized protein SLC44A5 gene:ENSG00000137968 /// Homo sapiens solute carrier family 44, member 5, mRNA (cDNA clone MGC:42574 IMAGE:4824861), complete cds. /// Homo sapiens solute carrier family 44, member 5 (SLC44A5), transcript variant 1, mRNA. /// Homo sapiens solute carrier family 44, member 5 (SLC44A5), transcript variant 2, mRNA. | solute carrier family 44, member 5   | 0.001243544 | -1.364925707 |
| CCDC56   | Coiled-coil domain-containing protein 56 gene:ENSG00000183978 /// Homo sapiens mRNA for HSPC009 variant, clone: PNC06538. /// Homo sapiens coiled-coil domain containing 56 (CCDC56), mRNA.                                                                                                                                                                                                                                                                                                                                                                                                  | coiled-coil domain containing 56     | 0.003281488 | 1.232223987  |
| C9orf123 | Isoform 2 of Transmembrane protein C9orf123 gene:ENSG00000137038 /// Homo sapiens cDNA FLJ76577 complete cds. /// Homo sapiens chromosome 9 open reading frame 123 (C9orf123), mRNA.                                                                                                                                                                                                                                                                                                                                                                                                         | chromosome 9 open reading frame 123  | 2.58832E-05 | 1.339680345  |
| SCAMP3   | Isoform 1 of Secretory carrier-associated membrane protein 3 gene:ENSG00000116521 /// Isoform 2 of Secretory carrier-associated membrane protein 3 gene:ENSG00000116521 /// Homo sapiens secretory carrier membrane protein (SCAMP3) mRNA, complete cds. /// Homo sapiens secretory carrier membrane protein 3 (SCAMP3), transcript variant 2, mRNA. /// Homo sapiens secretory carrier membrane protein 3 (SCAMP3), transcript variant 1, mRNA.                                                                                                                                             | secretory carrier membrane protein 3 | 0.000826331 | 1.216168119  |

|          |                                                                                                                                                                                                                                                                                                                                                       |                                              |                 |                 |
|----------|-------------------------------------------------------------------------------------------------------------------------------------------------------------------------------------------------------------------------------------------------------------------------------------------------------------------------------------------------------|----------------------------------------------|-----------------|-----------------|
| HINT2    | Histidine triad nucleotide-binding protein 2 gene:ENSG00000137133 /// Homo sapiens histidine triad nucleotide binding protein 2, mRNA (cDNA clone MGC:54098 IMAGE:6018376), complete cds. /// Homo sapiens histidine triad nucleotide binding protein 2 (HINT2), mRNA.                                                                                | histidine triad nucleotide binding protein 2 | 0.001865<br>597 | 1.243596<br>734 |
| NIPSNAP1 | Protein NipSnap homolog 1 gene:ENSG00000184117 /// Homo sapiens mRNA for NIPSNAP1 protein. /// Homo sapiens nipsnap homolog 1 (C. elegans) (NIPSNAP1), mRNA.                                                                                                                                                                                          | nipsnap homolog 1 (C. elegans)               | 0.001274<br>444 | 1.209693<br>015 |
| MTERFD1  | Isoform 1 of mTERF domain-containing protein 1, mitochondrial gene:ENSG00000156469 /// Homo sapiens MTERF domain containing 1, mRNA (cDNA clone MGC:3363 IMAGE:3529518), complete cds. /// Homo sapiens MTERF domain containing 1 (MTERFD1), mRNA.                                                                                                    | MTERF domain containing 1                    | 0.006977<br>788 | 1.239823<br>683 |
| C22orf32 | UPF0466 protein C22orf32, mitochondrial gene:ENSG00000183172 /// Homo sapiens cDNA FLJ38317 fis, clone FCBBF3023704. /// Homo sapiens chromosome 22 open reading frame 32, mRNA (cDNA clone MGC:32898 IMAGE:4798793), complete cds. /// Homo sapiens DJ186O1.1 full length open reading frame (ORF) cDNA clone (cDNA clone C22ORF:pGEM.dJ186O1.1.V4). | chromosome 22 open reading frame 32          | 0.004270<br>924 | 1.201164<br>319 |
| KIAA0101 | PCNA-associated factor gene:ENSG00000166803 /// hypothetical protein LOC9768 isoform 2 gene:ENSG00000166803 /// GKGM353 gene:ENSG00000219244 /// Homo sapiens KIAA0101, mRNA (cDNA clone MGC:2250 IMAGE:2988995), complete cds. /// Homo sapiens KIAA0101 (KIAA0101), transcript variant 1, mRNA. /// Homo sapiens                                    | KIAA0101                                     | 0.001796<br>385 | 1.294870<br>92  |

|                           |                                                                                                                                                                                                                                                                                                                                                                                                                                                                                   |                                                  |                   |             |
|---------------------------|-----------------------------------------------------------------------------------------------------------------------------------------------------------------------------------------------------------------------------------------------------------------------------------------------------------------------------------------------------------------------------------------------------------------------------------------------------------------------------------|--------------------------------------------------|-------------------|-------------|
|                           | KIAA0101 (KIAA0101), transcript variant 2, mRNA.                                                                                                                                                                                                                                                                                                                                                                                                                                  |                                                  |                   |             |
| CISD1                     | CDGSH iron sulfur domain-containing protein 1 gene:ENSG00000122873 /// Homo sapiens CDGSH iron sulfur domain 1, mRNA (cDNA clone MGC:14684 IMAGE:4132410), complete cds. /// Homo sapiens CDGSH iron sulfur domain 1 (CISD1), mRNA.                                                                                                                                                                                                                                               | CDGSH iron sulfur domain 1                       | 0.002452111       | 1.259452186 |
| <b>Functional Group 4</b> | <b>Transcript Description</b>                                                                                                                                                                                                                                                                                                                                                                                                                                                     | <b>Gene Title</b>                                | <b>Bayes.In p</b> | <b>Fold</b> |
| ETFDH                     | Isoform 1 of Electron transfer flavoprotein-ubiquinone oxidoreductase, mitochondrial gene:ENSG00000171503 /// Isoform 2 of Electron transfer flavoprotein-ubiquinone oxidoreductase, mitochondrial gene:ENSG00000171503 /// Homo sapiens electron-transferring-flavoprotein dehydrogenase, mRNA (cDNA clone MGC:20062 IMAGE:3938660), complete cds. /// Homo sapiens electron-transferring-flavoprotein dehydrogenase (ETFDH), nuclear gene encoding mitochondrial protein, mRNA. | electron-transferring-flavoprotein dehydrogenase | 0.000685736       | 1.353307611 |

|        |                                                                                                                                                                                                                                                                                                                                                                                                                                                                                                                                                                                                                                                                                                                                                                                    |                                                                    |                 |                     |
|--------|------------------------------------------------------------------------------------------------------------------------------------------------------------------------------------------------------------------------------------------------------------------------------------------------------------------------------------------------------------------------------------------------------------------------------------------------------------------------------------------------------------------------------------------------------------------------------------------------------------------------------------------------------------------------------------------------------------------------------------------------------------------------------------|--------------------------------------------------------------------|-----------------|---------------------|
| GATM   | Isoform Cytoplasmic of Glycine amidinotransferase, mitochondrial gene:ENSG00000171766 /// Isoform Mitochondrial of Glycine amidinotransferase, mitochondrial gene:ENSG00000171766 /// Homo sapiens glycine amidinotransferase (L-arginine:glycine amidinotransferase), mRNA (cDNA clone MGC:1744 IMAGE:3010128), complete cds. /// Homo sapiens glycine amidinotransferase (L-arginine:glycine amidinotransferase) (GATM), nuclear gene encoding mitochondrial protein, mRNA.                                                                                                                                                                                                                                                                                                      | glycine amidinotransferase (L-arginine:glycine amidinotransferase) | 0.002893<br>872 | 1.190716<br>588     |
| ACADVL | cDNA FLJ56425, highly similar to Very-long-chain specific acyl-CoA dehydrogenase, mitochondrial gene:ENSG00000072778 /// cDNA FLJ56425, highly similar to Very-long-chain specific acyl-CoA dehydrogenase, mitochondrial gene:ENSG00000072778 /// Isoform 2 of Very long-chain specific acyl-CoA dehydrogenase, mitochondrial gene:ENSG00000072778 /// Homo sapiens acyl-Coenzyme A dehydrogenase, very long chain, mRNA (cDNA clone MGC:21196 IMAGE:4471040), complete cds. /// Homo sapiens acyl-Coenzyme A dehydrogenase, very long chain (ACADVL), nuclear gene encoding mitochondrial protein, transcript variant 1, mRNA. /// Homo sapiens acyl-Coenzyme A dehydrogenase, very long chain (ACADVL), nuclear gene encoding mitochondrial protein, transcript variant 2, mRNA. | acyl-Coenzyme A dehydrogenase, very long chain                     | 0.008181<br>275 | -<br>1.142638<br>64 |

|      |                                                                                                                                                                                                                                                                                                                                                                                                                                                                                                                                                             |                                                                              |                 |                      |
|------|-------------------------------------------------------------------------------------------------------------------------------------------------------------------------------------------------------------------------------------------------------------------------------------------------------------------------------------------------------------------------------------------------------------------------------------------------------------------------------------------------------------------------------------------------------------|------------------------------------------------------------------------------|-----------------|----------------------|
| DCI  | Isoform 1 of 3,2-trans-enoyl-CoA isomerase, mitochondrial gene:ENSG00000167969 /// Homo sapiens cDNA FLJ76046 complete cds, highly similar to Homo sapiens dodecenoyl-Coenzyme A delta isomerase (3,2trans-enoyl-Coenzyme A isomerase) (DCI), mRNA. /// Homo sapiens dodecenoyl-Coenzyme A delta isomerase (3,2 trans-enoyl-Coenzyme A isomerase) (DCI), nuclear gene encoding mitochondrial protein, mRNA.                                                                                                                                                 | dodecenoyl-Coenzyme A delta isomerase (3,2 trans-enoyl-Coenzyme A isomerase) | 0.003412<br>221 | 1.180928<br>766      |
| FDXR | Isoform Long of NADPH:adrenodoxin oxidoreductase, mitochondrial gene:ENSG00000161513 /// Homo sapiens ferredoxin reductase, mRNA (cDNA clone MGC:1505 IMAGE:3537008), complete cds. /// Homo sapiens ferredoxin reductase (FDXR), nuclear gene encoding mitochondrial protein, transcript variant 1, mRNA. /// Homo sapiens ferredoxin reductase (FDXR), nuclear gene encoding mitochondrial protein, transcript variant 2, mRNA.                                                                                                                           | ferredoxin reductase                                                         | 0.000485<br>311 | -<br>1.246605<br>036 |
| ETFA | Electron transfer flavoprotein subunit alpha, mitochondrial gene:ENSG00000140374 /// Homo sapiens cDNA FLJ76486 complete cds, highly similar to Homo sapiens electron-transfer-flavoprotein, alpha polypeptide (glutaric aciduria II) (ETFA), nuclear gene encoding mitochondrial protein, mRNA. /// Homo sapiens electron-transfer-flavoprotein, alpha polypeptide (ETFA), nuclear gene encoding mitochondrial protein, transcript variant 1, mRNA. /// Homo sapiens electron-transfer-flavoprotein, alpha polypeptide (ETFA), transcript variant 2, mRNA. | electron-transfer-flavoprotein, alpha polypeptide                            | 0.002297<br>232 | 1.203357<br>136      |

|                           |                                                                                                                                                                                                                                                                                                                                                                                                                                                                                                                                                                                |                                                             |                   |             |
|---------------------------|--------------------------------------------------------------------------------------------------------------------------------------------------------------------------------------------------------------------------------------------------------------------------------------------------------------------------------------------------------------------------------------------------------------------------------------------------------------------------------------------------------------------------------------------------------------------------------|-------------------------------------------------------------|-------------------|-------------|
| DLD                       | Dihydrolipoyl dehydrogenase, mitochondrial<br>gene:ENSG00000091140 /// Homo sapiens cDNA FLJ56061 complete cds, highly similar to Dihydrolipoyl dehydrogenase, mitochondrial precursor (EC 1.8.1.4). /// Homo sapiens dihydrolipoamide dehydrogenase (DLD), mRNA.                                                                                                                                                                                                                                                                                                              | dihydrolipoamide dehydrogenase                              | 0.008705796       | 1.146281234 |
| PCCB                      | Propionyl-CoA carboxylase beta chain, mitochondrial<br>gene:ENSG00000114054 /// Homo sapiens propionyl Coenzyme A carboxylase, beta polypeptide, mRNA (cDNA clone MGC:61502 IMAGE:6054692), complete cds. /// Homo sapiens propionyl Coenzyme A carboxylase, beta polypeptide (PCCB), nuclear gene encoding mitochondrial protein, mRNA.                                                                                                                                                                                                                                       | propionyl Coenzyme A carboxylase, beta polypeptide          | 0.002563897       | 1.175017123 |
| SLC27A3                   | Isoform 1 of Long-chain fatty acid transport protein 3<br>gene:ENSG00000143554 /// Isoform 1 of Long-chain fatty acid transport protein 3 gene:ENSG00000143554 /// 11 kDa protein<br>gene:ENSG00000143554 /// Solute carrier family 27 (Fatty acid transporter), member 3<br>gene:ENSG00000143554 /// Putative uncharacterized protein<br>gene:ENSG00000216243 /// Homo sapiens cDNA FLJ43112 fis, clone CTONG2028124, weakly similar to Homo sapiens VLCS-H1 protein (VLCS-H1). /// Homo sapiens solute carrier family 27 (fatty acid transporter), member 3 (SLC27A3), mRNA. | solute carrier family 27 (fatty acid transporter), member 3 | 0.002911584       | 1.206127894 |
| <b>Functional Group 5</b> | <b>Transcript Description</b>                                                                                                                                                                                                                                                                                                                                                                                                                                                                                                                                                  | <b>Gene Title</b>                                           | <b>Bayes.In p</b> | <b>Fold</b> |

|         |                                                                                                                                                                                                                                                                                                                                                                                                                                                                                                                                             |                                               |                 |                      |
|---------|---------------------------------------------------------------------------------------------------------------------------------------------------------------------------------------------------------------------------------------------------------------------------------------------------------------------------------------------------------------------------------------------------------------------------------------------------------------------------------------------------------------------------------------------|-----------------------------------------------|-----------------|----------------------|
| CCDC50  | 70 kDa protein<br>gene:ENSG00000152492 /// 50 kDa protein gene:ENSG00000152492 /// Isoform 2 of Coiled-coil domain-containing protein 50<br>gene:ENSG00000152492 /// Isoform 1 of Coiled-coil domain-containing protein 50 gene:ENSG00000152492 /// Homo sapiens coiled-coil domain containing 50, mRNA (cDNA clone MGC:70346 IMAGE:6049272), complete cds. /// Homo sapiens coiled-coil domain containing 50 (CCDC50), transcript variant 2, mRNA. /// Homo sapiens coiled-coil domain containing 50 (CCDC50), transcript variant 1, mRNA. | coiled-coil domain containing 50              | 0.004869<br>264 | -<br>1.177310<br>654 |
| FAM125A | Isoform 1 of Protein FAM125A<br>gene:ENSG00000141971 /// Isoform 2 of Protein FAM125A<br>gene:ENSG00000141971 /// Homo sapiens cDNA FLJ32495 fis, clone SKNSH2000163. /// Homo sapiens family with sequence similarity 125, member A (FAM125A), mRNA.                                                                                                                                                                                                                                                                                       | family with sequence similarity 125, member A | 0.001402<br>382 | 1.237034<br>533      |



|                           |                                                                                                                                                                                                                                                                                                                                                                                                                                                                                                                                                                                                                                                                                                                                                                                                                                                                                         |                                                                                                                                          |                   |              |
|---------------------------|-----------------------------------------------------------------------------------------------------------------------------------------------------------------------------------------------------------------------------------------------------------------------------------------------------------------------------------------------------------------------------------------------------------------------------------------------------------------------------------------------------------------------------------------------------------------------------------------------------------------------------------------------------------------------------------------------------------------------------------------------------------------------------------------------------------------------------------------------------------------------------------------|------------------------------------------------------------------------------------------------------------------------------------------|-------------------|--------------|
| KIAA1217                  | sickle tail isoform 2<br>gene:ENSG00000120549 /// Likely orthologue of Mus musculus enhancer trap locus 4<br>gene:ENSG00000120549 /// sickle tail isoform 2 gene:ENSG00000120549 /// Isoform 1 of Sickle tail protein homolog gene:ENSG00000120549 /// Putative uncharacterized protein KIAA1217 gene:ENSG00000120549 /// Isoform 6 of Sickle tail protein homolog gene:ENSG00000120549 /// Isoform 4 of Sickle tail protein homolog gene:ENSG00000120549 /// Isoform 7 of Sickle tail protein homolog gene:ENSG00000120549 /// Isoform 3 of Sickle tail protein homolog gene:ENSG00000120549 /// Homo sapiens mRNA; cDNA DKFZp686E0469 (from clone DKFZp686E0469); complete cds. /// Homo sapiens KIAA1217 (KIAA1217), transcript variant 1, mRNA. /// Homo sapiens KIAA1217 (KIAA1217), transcript variant 2, mRNA. /// Homo sapiens KIAA1217 (KIAA1217), transcript variant 3, mRNA. | KIAA1217                                                                                                                                 | 0.000528524       | -1.241607706 |
| NBPF15                    | Putative uncharacterized protein ENSP00000349255<br>gene:ENSG00000162825 /// Neuroblastoma breakpoint family, member 10 gene:ENSG00000203832 /// Homo sapiens cDNA FLJ78393 complete cds. /// Homo sapiens cDNA FLJ60520 complete cds, weakly similar to Homo sapiens phosphodiesterase 4D interacting protein, transcript variant 1, mRNA. /// Homo sapiens mRNA; cDNA DKFZp586O031 (from clone DKFZp586O031). /// Homo sapiens clone IIIb5 NBPF15 mRNA, complete cds.                                                                                                                                                                                                                                                                                                                                                                                                                 | neuroblastoma breakpoint family, member 15 /// neuroblastoma breakpoint family, member 14 /// neuroblastoma breakpoint family, member 10 | 0.012580751       | -1.15646752  |
| <b>Functional Group 6</b> | <b>Transcript Description</b>                                                                                                                                                                                                                                                                                                                                                                                                                                                                                                                                                                                                                                                                                                                                                                                                                                                           | <b>Gene Title</b>                                                                                                                        | <b>Bayes.In p</b> | <b>Fold</b>  |

|       |                                                                                                                                                                                                                                                                                                                                                                                                                                                                                                                                                                                                                                                                                                                                                                                                                                                                                                                                                                                                                                                                                                                                                                                                                                                                                                                                                                                                 |                                                        |                 |                      |
|-------|-------------------------------------------------------------------------------------------------------------------------------------------------------------------------------------------------------------------------------------------------------------------------------------------------------------------------------------------------------------------------------------------------------------------------------------------------------------------------------------------------------------------------------------------------------------------------------------------------------------------------------------------------------------------------------------------------------------------------------------------------------------------------------------------------------------------------------------------------------------------------------------------------------------------------------------------------------------------------------------------------------------------------------------------------------------------------------------------------------------------------------------------------------------------------------------------------------------------------------------------------------------------------------------------------------------------------------------------------------------------------------------------------|--------------------------------------------------------|-----------------|----------------------|
| GINS2 | DNA replication complex GINS protein PSF2 gene:ENSG00000131153 /// Homo sapiens GINS complex subunit 2 (Psf2 homolog), mRNA (cDNA clone MGC:19836 IMAGE:4098007), complete cds. /// Homo sapiens GINS complex subunit 2 (Psf2 homolog) (GINS2), mRNA.                                                                                                                                                                                                                                                                                                                                                                                                                                                                                                                                                                                                                                                                                                                                                                                                                                                                                                                                                                                                                                                                                                                                           | GINS complex subunit 2 (Psf2 homolog)                  | 0.001926<br>016 | 1.188229<br>666      |
| CABYR | Isoform 3 of Calcium-binding tyrosine phosphorylation-regulated protein gene:ENSG00000154040 /// Isoform 5 of Calcium-binding tyrosine phosphorylation-regulated protein gene:ENSG00000154040 /// Isoform 5 of Calcium-binding tyrosine phosphorylation-regulated protein gene:ENSG00000154040 /// Isoform 1 of Calcium-binding tyrosine phosphorylation-regulated protein gene:ENSG00000154040 /// Isoform 2 of Calcium-binding tyrosine phosphorylation-regulated protein gene:ENSG00000154040 /// Isoform 1 of Calcium-binding tyrosine phosphorylation-regulated protein gene:ENSG00000154040 /// Isoform 2 of Calcium-binding tyrosine phosphorylation-regulated protein gene:ENSG00000154040 /// Isoform 3 of Calcium-binding tyrosine phosphorylation-regulated protein gene:ENSG00000154040 /// Homo sapiens fibrousheathin II mRNA, complete cds. /// Homo sapiens calcium binding tyrosine-(Y)-phosphorylation regulated (CABYR), transcript variant 1, mRNA. /// Homo sapiens calcium binding tyrosine-(Y)-phosphorylation regulated (CABYR), transcript variant 2, mRNA. /// Homo sapiens calcium binding tyrosine-(Y)-phosphorylation regulated (CABYR), transcript variant 7, mRNA. /// Homo sapiens calcium binding tyrosine-(Y)-phosphorylation regulated (CABYR), transcript variant 6, mRNA. /// Homo sapiens calcium binding tyrosine-(Y)-phosphorylation regulated (CABYR), | calcium binding tyrosine-(Y)-phosphorylation regulated | 0.000373<br>376 | -<br>1.235811<br>167 |

|         |                                                                                                                                                                                                                                                                                                                                                                                                                                                  |                                 |                 |                      |
|---------|--------------------------------------------------------------------------------------------------------------------------------------------------------------------------------------------------------------------------------------------------------------------------------------------------------------------------------------------------------------------------------------------------------------------------------------------------|---------------------------------|-----------------|----------------------|
|         | transcript variant 5, mRNA. /// Homo sapiens calcium binding tyrosine-(Y)-phosphorylation regulated (CABYR), transcript variant 3, mRNA.                                                                                                                                                                                                                                                                                                         |                                 |                 |                      |
| ZFAND2A | <p>cDNA FLJ76351, highly similar to Homo sapiens zinc finger, AN1-type domain 2A (ZFAND2A), mRNA<br/> gene:ENSG00000178381 /// Putative uncharacterized protein ZFAND2A<br/> gene:ENSG00000178381 /// AN1-type zinc finger protein 2A<br/> gene:ENSG00000178381 /// Homo sapiens zinc finger, AN1-type domain 2A, mRNA (cDNA clone MGC:39501 IMAGE:5263788), complete cds. /// Homo sapiens zinc finger, AN1-type domain 2A (ZFAND2A), mRNA.</p> | zinc finger, AN1-type domain 2A | 0.000191<br>425 | -<br>1.355119<br>998 |

|         |                                                                                                                                                                                                                                                                                                                                                                                                                                                                                                                                                                        |                                                                                                            |                 |                      |
|---------|------------------------------------------------------------------------------------------------------------------------------------------------------------------------------------------------------------------------------------------------------------------------------------------------------------------------------------------------------------------------------------------------------------------------------------------------------------------------------------------------------------------------------------------------------------------------|------------------------------------------------------------------------------------------------------------|-----------------|----------------------|
| SPANXF1 | Sperm protein associated with the nucleus on the X chromosome B/F<br>gene:ENSG00000198820 /// Sperm protein associated with the nucleus on the X chromosome B/F<br>gene:ENSG00000203929 /// Putative uncharacterized protein SPANXC<br>gene:ENSG00000198573 /// Homo sapiens nuclear-associated protein SPAN-Xb (SPANX) mRNA, complete cds. /// Homo sapiens SPAN-Xd mRNA, complete cds. /// Homo sapiens SPANX family, member B1 (SPANXB1), mRNA. /// Homo sapiens SPANX family, member B2 (SPANXB2), mRNA. /// Homo sapiens SPANX family, member F1 (SPANXF1), mRNA. | SPANX family, member B1 /// SPANX family, member B2 /// SPANX family, member D /// SPANX family, member F1 | 1.20E-05        | -<br>1.617080<br>841 |
| NDRG1   | cDNA FLJ39243 fis, clone OCBBF2008283, highly similar to Protein NDRG1<br>gene:ENSG00000104419 /// Protein NDRG1 gene:ENSG00000104419 /// Homo sapiens cDNA FLJ44977 fis, clone BRAWH3002513, highly similar to Protein NDRG1. /// Homo sapiens N-myc downstream regulated 1 (NDRG1), transcript variant 2, mRNA. /// Homo sapiens N-myc downstream regulated 1 (NDRG1), transcript variant 1, mRNA.                                                                                                                                                                   | N-myc downstream regulated 1                                                                               | 3.39352E-05     | -<br>1.362878<br>196 |
| LPIN1   | Putative uncharacterized protein LPIN1 gene:ENSG00000134324 /// cDNA FLJ56073, highly similar to Lipin-1 gene:ENSG00000134324 /// Lipin-1 gene:ENSG00000134324 /// cDNA FLJ51642, highly similar to Lipin-1 gene:ENSG00000134324 /// Putative uncharacterized protein LPIN1 gene:ENSG00000134324 /// Homo sapiens lipin 1, mRNA (cDNA clone MGC:40396 IMAGE:3906281), complete cds. /// Homo sapiens lipin 1 (LPIN1), mRNA.                                                                                                                                            | lipin 1                                                                                                    | 0.001923<br>399 | 1.253328<br>79       |

|         |                                                                                                                                                                                                                                                                                                                                                                                                                                                                                                                                                                                                                                                                                                                                                                                                                                                                                                                                                                                                                                                                                                                                                                                                                                                |                                                                                                                                                                                           |          |                      |
|---------|------------------------------------------------------------------------------------------------------------------------------------------------------------------------------------------------------------------------------------------------------------------------------------------------------------------------------------------------------------------------------------------------------------------------------------------------------------------------------------------------------------------------------------------------------------------------------------------------------------------------------------------------------------------------------------------------------------------------------------------------------------------------------------------------------------------------------------------------------------------------------------------------------------------------------------------------------------------------------------------------------------------------------------------------------------------------------------------------------------------------------------------------------------------------------------------------------------------------------------------------|-------------------------------------------------------------------------------------------------------------------------------------------------------------------------------------------|----------|----------------------|
| SPANXA1 | <p>Sperm protein associated with the nucleus on the X chromosome C<br/> gene:ENSG00000198573 /// Putative uncharacterized protein SPANXC<br/> gene:ENSG00000198573 /// Sperm protein associated with the nucleus on the X chromosome A<br/> gene:ENSG00000198021 /// Putative uncharacterized protein SPANXA2<br/> gene:ENSG00000198021 /// Sperm protein associated with the nucleus on the X chromosome A<br/> gene:ENSG00000203926 /// Putative uncharacterized protein SPANXA2<br/> gene:ENSG00000203926 /// Sperm protein associated with the nucleus on the X chromosome D<br/> gene:ENSG00000196406 /// Homo sapiens nuclear-associated protein SPAN-Xa (SPANX) mRNA, complete cds. /// Homo sapiens SPANX family, member E, mRNA (cDNA clone MGC:71908 IMAGE:4047937), complete cds. /// Homo sapiens SPANX family, member D, mRNA (cDNA clone MGC:119769 IMAGE:40013988), complete cds. /// Homo sapiens SPANX family, member A2 (SPANXA2), mRNA. /// Homo sapiens sperm protein associated with the nucleus, X-linked, family member A1 (SPANXA1), mRNA. /// Homo sapiens SPANX family, member D (SPANXD), mRNA. /// Homo sapiens SPANX family, member C (SPANXC), mRNA. /// Homo sapiens SPANX family, member E (SPANXE), mRNA.</p> | <p>sperm protein associated with the nucleus, X-linked, family member A1 /// SPANX family, member A2 /// SPANX family, member E /// SPANX family, member D /// SPANX family, member C</p> | 7.10E-06 | -<br>1.428106<br>945 |
|---------|------------------------------------------------------------------------------------------------------------------------------------------------------------------------------------------------------------------------------------------------------------------------------------------------------------------------------------------------------------------------------------------------------------------------------------------------------------------------------------------------------------------------------------------------------------------------------------------------------------------------------------------------------------------------------------------------------------------------------------------------------------------------------------------------------------------------------------------------------------------------------------------------------------------------------------------------------------------------------------------------------------------------------------------------------------------------------------------------------------------------------------------------------------------------------------------------------------------------------------------------|-------------------------------------------------------------------------------------------------------------------------------------------------------------------------------------------|----------|----------------------|

|        |                                                                                                                                                                                                                                                                                                                                                                                                                                                                                                                                                                                                                                                                                                                                                                                                                                                                                                                                                                                                                                                                                                                                                                                                                                                |                                                                                                                                                                                           |          |                      |
|--------|------------------------------------------------------------------------------------------------------------------------------------------------------------------------------------------------------------------------------------------------------------------------------------------------------------------------------------------------------------------------------------------------------------------------------------------------------------------------------------------------------------------------------------------------------------------------------------------------------------------------------------------------------------------------------------------------------------------------------------------------------------------------------------------------------------------------------------------------------------------------------------------------------------------------------------------------------------------------------------------------------------------------------------------------------------------------------------------------------------------------------------------------------------------------------------------------------------------------------------------------|-------------------------------------------------------------------------------------------------------------------------------------------------------------------------------------------|----------|----------------------|
| SPANXC | <p>Sperm protein associated with the nucleus on the X chromosome C<br/> gene:ENSG00000198573 /// Putative uncharacterized protein SPANXC<br/> gene:ENSG00000198573 /// Sperm protein associated with the nucleus on the X chromosome A<br/> gene:ENSG00000198021 /// Putative uncharacterized protein SPANXA2<br/> gene:ENSG00000198021 /// Sperm protein associated with the nucleus on the X chromosome A<br/> gene:ENSG00000203926 /// Putative uncharacterized protein SPANXA2<br/> gene:ENSG00000203926 /// Sperm protein associated with the nucleus on the X chromosome D<br/> gene:ENSG00000196406 /// Homo sapiens nuclear-associated protein SPAN-Xa (SPANX) mRNA, complete cds. /// Homo sapiens SPANX family, member E, mRNA (cDNA clone MGC:71908 IMAGE:4047937), complete cds. /// Homo sapiens SPANX family, member D, mRNA (cDNA clone MGC:119769 IMAGE:40013988), complete cds. /// Homo sapiens SPANX family, member A2 (SPANXA2), mRNA. /// Homo sapiens sperm protein associated with the nucleus, X-linked, family member A1 (SPANXA1), mRNA. /// Homo sapiens SPANX family, member D (SPANXD), mRNA. /// Homo sapiens SPANX family, member C (SPANXC), mRNA. /// Homo sapiens SPANX family, member E (SPANXE), mRNA.</p> | <p>sperm protein associated with the nucleus, X-linked, family member A1 /// SPANX family, member A2 /// SPANX family, member E /// SPANX family, member D /// SPANX family, member C</p> | 7.10E-06 | -<br>1.428106<br>945 |
|--------|------------------------------------------------------------------------------------------------------------------------------------------------------------------------------------------------------------------------------------------------------------------------------------------------------------------------------------------------------------------------------------------------------------------------------------------------------------------------------------------------------------------------------------------------------------------------------------------------------------------------------------------------------------------------------------------------------------------------------------------------------------------------------------------------------------------------------------------------------------------------------------------------------------------------------------------------------------------------------------------------------------------------------------------------------------------------------------------------------------------------------------------------------------------------------------------------------------------------------------------------|-------------------------------------------------------------------------------------------------------------------------------------------------------------------------------------------|----------|----------------------|

|        |                                                                                                                                                                                                                                                                                                                                                                                                            |                                                   |          |                      |
|--------|------------------------------------------------------------------------------------------------------------------------------------------------------------------------------------------------------------------------------------------------------------------------------------------------------------------------------------------------------------------------------------------------------------|---------------------------------------------------|----------|----------------------|
| SPANXE | Sperm protein associated with the nucleus on the X chromosome D gene:ENSG00000196406 /// Homo sapiens SPANX family, member E, mRNA (cDNA clone MGC:12501 IMAGE:3935644), complete cds. /// Homo sapiens SPANX family, member D, mRNA (cDNA clone MGC:150331 IMAGE:40119569), complete cds. /// Homo sapiens SPANX family, member D (SPANXD), mRNA. /// Homo sapiens SPANX family, member E (SPANXE), mRNA. | SPANX family, member E /// SPANX family, member D | 3.23E-06 | -<br>1.458595<br>391 |
| SPANXD | Sperm protein associated with the nucleus on the X chromosome D gene:ENSG00000196406 /// Homo sapiens SPANX family, member E, mRNA (cDNA clone MGC:12501 IMAGE:3935644), complete cds. /// Homo sapiens SPANX family, member D, mRNA (cDNA clone MGC:150331 IMAGE:40119569), complete cds. /// Homo sapiens SPANX family, member D (SPANXD), mRNA. /// Homo sapiens SPANX family, member E (SPANXE), mRNA. | SPANX family, member E /// SPANX family, member D | 3.23E-06 | -<br>1.458595<br>391 |

|         |                                                                                                                                                                                                                                                                                                                                                                                                                                                                                                                                                                                                                                                                                                                                                                       |                                                                |                 |                      |
|---------|-----------------------------------------------------------------------------------------------------------------------------------------------------------------------------------------------------------------------------------------------------------------------------------------------------------------------------------------------------------------------------------------------------------------------------------------------------------------------------------------------------------------------------------------------------------------------------------------------------------------------------------------------------------------------------------------------------------------------------------------------------------------------|----------------------------------------------------------------|-----------------|----------------------|
| PPP2R5D | Isoform Delta-1 of Serine/threonine-protein phosphatase 2A 56 kDa regulatory subunit delta isoform<br>gene:ENSG00000112640 /// Isoform Delta-3 of Serine/threonine-protein phosphatase 2A 56 kDa regulatory subunit delta isoform<br>gene:ENSG00000112640 /// Homo sapiens cDNA FLJ55863 complete cds, highly similar to Serine/threonine-protein phosphatase 2A 56 kDa regulatory subunit delta isoform. /// Homo sapiens protein phosphatase 2, regulatory subunit B', delta isoform (PPP2R5D), transcript variant 1, mRNA. /// Homo sapiens protein phosphatase 2, regulatory subunit B', delta isoform (PPP2R5D), transcript variant 2, mRNA. /// Homo sapiens protein phosphatase 2, regulatory subunit B', delta isoform (PPP2R5D), transcript variant 3, mRNA. | protein phosphatase 2, regulatory subunit B', delta isoform    | 0.007509<br>104 | 1.149557<br>844      |
| C7orf11 | TTD non-photosensitive 1 protein<br>gene:ENSG00000168303 /// Homo sapiens cDNA FLJ76008 complete cds. /// Homo sapiens chromosome 7 open reading frame 11 (C7orf11), mRNA.                                                                                                                                                                                                                                                                                                                                                                                                                                                                                                                                                                                            | chromosome 7 open reading frame 11                             | 0.005149<br>876 | 1.190751<br>951      |
| DACT1   | 60 kDa protein<br>gene:ENSG00000165617 /// Dapper homolog 1 gene:ENSG00000165617 /// dapper 1 isoform 2<br>gene:ENSG00000165617 /// Homo sapiens heptacellular carcinoma novel gene-3 protein mRNA, complete cds. /// Homo sapiens dapper, antagonist of beta-catenin, homolog 1 (Xenopus laevis) (DACT1), transcript variant 2, mRNA. /// Homo sapiens dapper, antagonist of beta-catenin, homolog 1 (Xenopus laevis) (DACT1), transcript variant 1, mRNA.                                                                                                                                                                                                                                                                                                           | dapper, antagonist of beta-catenin, homolog 1 (Xenopus laevis) | 1.30555E<br>-05 | -<br>1.286163<br>469 |



|         |                                                                                                                                                                                                                                                                                                   |                                                        |                 |                      |
|---------|---------------------------------------------------------------------------------------------------------------------------------------------------------------------------------------------------------------------------------------------------------------------------------------------------|--------------------------------------------------------|-----------------|----------------------|
| TSNAX   | Translin-associated protein X<br>gene:ENSG00000116918 /// Translin-associated factor X, isoform CRA_a<br>gene:ENSG00000116918 ///<br>H.sapiens mRNA for translin associated protein X. /// Homo sapiens translin-associated factor X (TSNAX), mRNA.                                               | translin-associated factor X                           | 0.000995<br>975 | 1.222170<br>944      |
| PNMA2   | Paraneoplastic antigen Ma2<br>gene:ENSG00000171362 /// Homo sapiens paraneoplastic antigen MA2, mRNA (cDNA clone MGC:43166 IMAGE:5262276), complete cds. /// Homo sapiens paraneoplastic antigen MA2 (PNMA2), mRNA.                                                                               | paraneoplastic antigen MA2                             | 0.001727<br>172 | 1.323093<br>403      |
| NPM3    | Nucleoplasmin-3<br>gene:ENSG00000107833 /// Homo sapiens<br>nucleophosmin/nucleoplasmin 3 (NPM3) mRNA, complete cds. /// Homo sapiens<br>nucleophosmin/nucleoplasmin, 3 (NPM3), mRNA.                                                                                                             | nucleophosmin/nucleoplasmin, 3                         | 0.005508<br>727 | 1.180459<br>759      |
| PTMA    | Homo sapiens prothymosin a14 mRNA, complete cds. /// Homo sapiens fetal thymus prothymosin alpha mRNA, complete cds.                                                                                                                                                                              | prothymosin, alpha pseudogene 7 /// prothymosin, alpha | 0.003530<br>362 | 1.126089<br>959      |
| UBASH3B | Ubiquitin associated and SH3 domain-containing protein B<br>gene:ENSG00000154127 /// Homo sapiens ubiquitin associated and SH3 domain containing, B, mRNA (cDNA clone MGC:15437 IMAGE:2958242), complete cds. /// Homo sapiens ubiquitin associated and SH3 domain containing, B (UBASH3B), mRNA. | ubiquitin associated and SH3 domain containing, B      | 0.000424<br>412 | -<br>1.285686<br>466 |
| PGAM5   | Isoform 2 of Phosphoglycerate mutase family member 5<br>gene:ENSG00000176894 /// Homo sapiens phosphoglycerate mutase family member 5, mRNA (cDNA clone MGC:5352 IMAGE:3048106), complete cds. /// Homo sapiens phosphoglycerate mutase family member 5 (PGAM5), mRNA.                            | phosphoglycerate mutase family member 5                | 0.620267<br>202 | -<br>1.023484<br>193 |

|         |                                                                                                                                                                                                                                                                                                                                                                                                                         |                                                                     |             |             |
|---------|-------------------------------------------------------------------------------------------------------------------------------------------------------------------------------------------------------------------------------------------------------------------------------------------------------------------------------------------------------------------------------------------------------------------------|---------------------------------------------------------------------|-------------|-------------|
| MAGEA11 | melanoma antigen family A, 11 isoform b gene:ENSG00000185247 /// Isoform 1 of Melanoma-associated antigen 11 gene:ENSG00000185247 /// Homo sapiens cDNA FLJ45952 fis, clone PLACE7009563, highly similar to Melanoma-associated antigen 11. /// Homo sapiens melanoma antigen family A, 11 (MAGEA11), transcript variant 1, mRNA. /// Homo sapiens melanoma antigen family A, 11 (MAGEA11), transcript variant 2, mRNA. | melanoma antigen family A, 11                                       | 0.005554017 | 1.331664483 |
| FAM125A | Isoform 1 of Protein FAM125A gene:ENSG00000141971 /// Isoform 2 of Protein FAM125A gene:ENSG00000141971 /// Homo sapiens cDNA FLJ32495 fis, clone SKNSH2000163. /// Homo sapiens family with sequence similarity 125, member A (FAM125A), mRNA.                                                                                                                                                                         | family with sequence similarity 125, member A                       | 0.001402382 | 1.237034533 |
| COPS7A  | COP9 signalosome complex subunit 7a gene:ENSG00000111652 /// Homo sapiens COP9 constitutive photomorphogenic homolog subunit 7A (Arabidopsis), mRNA (cDNA clone MGC:19475 IMAGE:4025790), complete cds. /// Homo sapiens COP9 constitutive photomorphogenic homolog subunit 7A (Arabidopsis) (COPS7A), mRNA.                                                                                                            | COP9 constitutive photomorphogenic homolog subunit 7A (Arabidopsis) | 0.003162298 | 1.21724726  |
| YPEL1   | Protein yippee-like 1 gene:ENSG00000100027 /// Putative uncharacterized protein YPEL1 gene:ENSG00000100027 /// Homo sapiens yippee-like 1 (Drosophila), mRNA (cDNA clone MGC:26488 IMAGE:4826997), complete cds. /// Homo sapiens yippee-like 1 (Drosophila) (YPEL1), mRNA.                                                                                                                                             | yippee-like 1 (Drosophila)                                          | 0.007113213 | 1.248356741 |

|       |                                                                                                                                                                                                                                                                                                                                                                                                                                                                                 |                               |                 |                 |
|-------|---------------------------------------------------------------------------------------------------------------------------------------------------------------------------------------------------------------------------------------------------------------------------------------------------------------------------------------------------------------------------------------------------------------------------------------------------------------------------------|-------------------------------|-----------------|-----------------|
| SPAG7 | Sperm-associated antigen 7<br>gene:ENSG00000091640 /// Homo sapiens sperm associated antigen 7, mRNA (cDNA clone MGC:20134 IMAGE:4330461), complete cds. /// Homo sapiens sperm associated antigen 7 (SPAG7), mRNA.                                                                                                                                                                                                                                                             | sperm associated antigen 7    | 0.003398<br>118 | 1.176136<br>848 |
| BRD3  | Isoform 1 of Bromodomain-containing protein 3<br>gene:ENSG00000169925 /// 21 kDa protein gene:ENSG00000169925 /// Isoform 2 of Bromodomain-containing protein 3<br>gene:ENSG00000169925 /// Isoform 2 of Bromodomain-containing protein 3 gene:ENSG00000169925 /// Bromodomain containing 3<br>gene:ENSG00000169925 /// Homo sapiens bromodomain containing 3, mRNA (cDNA clone MGC:29612 IMAGE:4856840), complete cds. /// Homo sapiens bromodomain containing 3 (BRD3), mRNA. | bromodomain containing 3      | 0.002066<br>872 | 1.198202<br>243 |
| IFI35 | Isoform 2 of Interferon-induced 35 kDa protein gene:ENSG00000068079 /// Homo sapiens interferon-induced protein 35, mRNA (cDNA clone MGC:2935 IMAGE:3050452), complete cds. /// Homo sapiens interferon-induced protein 35 (IFI35), mRNA.                                                                                                                                                                                                                                       | interferon-induced protein 35 | 0.008660<br>787 | 1.224648<br>87  |
| IWS1  | Isoform 1 of Protein IWS1 homolog<br>gene:ENSG00000163166 /// cdna:known<br>chromosome:NCBI36:2:127954875:128000533:-1 gene:ENSG00000163166<br>/// cdna:known<br>chromosome:NCBI36:2:127979086:128000932:-1 gene:ENSG00000163166<br>/// Homo sapiens cDNA FLJ54017 complete cds, highly similar to IWS1 homolog. /// Homo sapiens IWS1 homolog (S. cerevisiae) (IWS1), mRNA.                                                                                                    | IWS1 homolog (S. cerevisiae)  | 0.001302<br>013 | 1.201789<br>809 |

|          |                                                                                                                                                                                                                                                                                                                                                                                             |                                                                  |                 |                 |
|----------|---------------------------------------------------------------------------------------------------------------------------------------------------------------------------------------------------------------------------------------------------------------------------------------------------------------------------------------------------------------------------------------------|------------------------------------------------------------------|-----------------|-----------------|
| GPKOW    | G patch domain and KOW motifs-containing protein<br>gene:ENSG00000068394 /// Putative uncharacterized protein GPKOW<br>gene:ENSG00000068394 /// G patch domain and KOW motifs-containing protein gene:ENSG00000068394 /// Homo sapiens G patch domain and KOW motifs, mRNA (cDNA clone MGC:3986 IMAGE:2822421), complete cds. /// Homo sapiens G patch domain and KOW motifs (GPKOW), mRNA. | G patch domain and KOW motifs                                    | 0.006703<br>132 | 1.172773<br>344 |
| ANP32B   | Isoform 1 of Acidic leucine-rich nuclear phosphoprotein 32 family member B gene:ENSG00000136938 /// Human silver-stainable protein SSP29 mRNA, complete cds. /// Homo sapiens acidic (leucine-rich) nuclear phosphoprotein 32 family, member B (ANP32B), mRNA.                                                                                                                              | acidic (leucine-rich) nuclear phosphoprotein 32 family, member B | 4.44331E<br>-05 | 1.309988<br>011 |
| SGOL2    | cdna:known<br>chromosome:NCBI36:2:201099135:201143110:1 gene:ENSG00000163535 /// Isoform 1 of Shugoshin-like 2 gene:ENSG00000163535 /// 145 kDa protein gene:ENSG00000163535 /// Homo sapiens shugoshin-like 2 (S. pombe), mRNA (cDNA clone MGC:102910 IMAGE:30383194), complete cds. /// Homo sapiens shugoshin-like 2 (S. pombe) (SGOL2), mRNA.                                           | shugoshin-like 2 (S. pombe)                                      | 0.003419<br>706 | 1.190295<br>916 |
| C6orf108 | putative c-Myc-responsive isoform 2 gene:ENSG00000112667 /// c-Myc-responsive protein Rcl gene:ENSG00000112667 /// Homo sapiens RCL (Rcl) mRNA, complete cds. /// Homo sapiens chromosome 6 open reading frame 108 (C6orf108), transcript variant 2, mRNA. /// Homo sapiens chromosome 6 open reading frame 108 (C6orf108), transcript variant 1, mRNA.                                     | chromosome 6 open reading frame 108                              | 0.007549<br>731 | 1.189410<br>284 |

|                           |                                                                                                                                                                                                                                                                                                                                                                                                           |                                                                  |                   |                 |
|---------------------------|-----------------------------------------------------------------------------------------------------------------------------------------------------------------------------------------------------------------------------------------------------------------------------------------------------------------------------------------------------------------------------------------------------------|------------------------------------------------------------------|-------------------|-----------------|
| C17orf49                  | Uncharacterized potential DNA-binding protein C17orf49<br>gene:ENSG00000161939 /// Homo sapiens cDNA FLJ31238 fis, clone KIDNE2004864. /// Homo sapiens ribonuclease, RNase K, mRNA (cDNA clone MGC:48891 IMAGE:5588971), complete cds.                                                                                                                                                                   | chromosome 17 open reading frame 49 ///<br>ribonuclease, RNase K | 0.000150<br>309   | 1.246491<br>795 |
| <b>Functional Group 7</b> | <b>Transcript Description</b>                                                                                                                                                                                                                                                                                                                                                                             | <b>Gene Title</b>                                                | <b>Bayes.In p</b> | <b>Fold</b>     |
| HMG20A                    | Isoform 1 of High mobility group protein 20A gene:ENSG00000140382 /// Isoform 1 of High mobility group protein 20A gene:ENSG00000140382 /// Homo sapiens high-mobility group 20A, mRNA (cDNA clone MGC:8813 IMAGE:3908842), complete cds. /// Homo sapiens high-mobility group 20A (HMG20A), mRNA.                                                                                                        | high-mobility group 20A                                          | 0.008452<br>154   | 1.152143<br>821 |
| NSBP1                     | Nucleosome-binding protein 1 gene:ENSG00000198157 /// Nucleosomal binding protein 1 gene:ENSG00000198157 /// Nucleosomal binding protein 1 gene:ENSG00000198157 /// Nucleosome-binding protein 1 gene:ENSG00000198157 /// Homo sapiens cDNA FLJ36739 fis, clone UTERU2013262. /// Homo sapiens nucleosomal binding protein 1 (NSBP1), mRNA.                                                               | nucleosomal binding protein 1                                    | 0.008542<br>632   | 1.222686<br>506 |
| HMGB2                     | High mobility group protein B2 gene:ENSG00000164104 /// Homo sapiens high-mobility group box 2, mRNA (cDNA clone MGC:110999 IMAGE:6163784), complete cds. /// Homo sapiens high-mobility group box 2 (HMGB2), transcript variant 1, mRNA. /// Homo sapiens high-mobility group box 2 (HMGB2), transcript variant 2, mRNA. /// Homo sapiens high-mobility group box 2 (HMGB2), transcript variant 3, mRNA. | high-mobility group box 2                                        | 0.003119<br>943   | 1.181512<br>538 |

|           |                                                                                                                                                                                                                                                                                                                                                                                                                                                                                                                                        |                                                       |             |             |
|-----------|----------------------------------------------------------------------------------------------------------------------------------------------------------------------------------------------------------------------------------------------------------------------------------------------------------------------------------------------------------------------------------------------------------------------------------------------------------------------------------------------------------------------------------------|-------------------------------------------------------|-------------|-------------|
| HIST1H2AD | <p>Histone H3.1<br/> gene:ENSG00000197409 /// cDNA, FLJ92409, highly similar to Homo sapiens histone 1, H2ad (HIST1H2AD), mRNA gene:ENSG00000197409 /// Histone H2A type 1-D<br/> gene:ENSG00000197409 /// Homo sapiens histone cluster 1, H3d, mRNA (cDNA clone MGC:45668 IMAGE:3608479), complete cds. /// Homo sapiens histone cluster 1, H2ad, mRNA (cDNA clone MGC:120842 IMAGE:7939652), complete cds. /// Homo sapiens histone cluster 1, H2ad (HIST1H2AD), mRNA. /// Homo sapiens histone cluster 1, H3d (HIST1H3D), mRNA.</p> | histone cluster 1, H3d<br>/// histone cluster 1, H2ad | 4.74E-05    | 1.303067009 |
| RPA2      | <p>Isoform 1 of Replication protein A 32 kDa subunit gene:ENSG00000117748<br/> /// Isoform 2 of Replication protein A 32 kDa subunit<br/> gene:ENSG00000117748 /// Isoform 3 of Replication protein A 32 kDa subunit gene:ENSG00000117748 /// Homo sapiens replication protein A2, 32kDa, mRNA (cDNA clone MGC:29683 IMAGE:4111194), complete cds. /// Homo sapiens replication protein A2, 32kDa (RPA2), mRNA.</p>                                                                                                                    | replication protein A2, 32kDa                         | 0.000372642 | 1.268836391 |
| HMGN4     | <p>High mobility group nucleosome-binding domain-containing protein 4<br/> gene:ENSG00000182952 /// High mobility group nucleosome-binding domain-containing protein 4<br/> gene:ENSG00000182952 /// Homo sapiens high mobility group nucleosomal binding domain 4, mRNA (cDNA clone MGC:5145 IMAGE:3452950), complete cds. /// Homo sapiens high mobility group nucleosomal binding domain 4 (HMGN4), mRNA.</p>                                                                                                                       | high mobility group nucleosomal binding domain 4      | 0.009913848 | 1.162668484 |

|           |                                                                                                                                                                                                                                                                                                                                                                                                                                                                                                                                      |                                                  |             |             |
|-----------|--------------------------------------------------------------------------------------------------------------------------------------------------------------------------------------------------------------------------------------------------------------------------------------------------------------------------------------------------------------------------------------------------------------------------------------------------------------------------------------------------------------------------------------|--------------------------------------------------|-------------|-------------|
| HMGN3     | Isoform 1 of High mobility group nucleosome-binding domain-containing protein 3<br>gene:ENSG00000118418 /// 11 kDa protein gene:ENSG00000118418 ///<br>Isoform 2 of High mobility group nucleosome-binding domain-containing protein 3<br>gene:ENSG00000118418 /// Homo sapiens TRIP7-like protein mRNA, complete cds. /// Homo sapiens high mobility group nucleosomal binding domain 3 (HMGN3), transcript variant 2, mRNA. /// Homo sapiens high mobility group nucleosomal binding domain 3 (HMGN3), transcript variant 1, mRNA. | high mobility group nucleosomal binding domain 3 | 0.002626091 | 1.19648497  |
| HIST1H1C  | Histone H1.2<br>gene:ENSG00000187837 /// Homo sapiens cDNA FLJ76039 complete cds, highly similar to Homo sapiens histone 1, H1c (HIST1H1C), mRNA. ///<br>Homo sapiens histone cluster 1, H1c (HIST1H1C), mRNA.                                                                                                                                                                                                                                                                                                                       | histone cluster 1, H1c                           | 0.00012822  | 1.284945067 |
| HIST2H2AC | BolA-like protein 1<br>gene:ENSG00000178096 /// Histone H2A type 2-C<br>gene:ENSG00000184260 /// Homo sapiens histone cluster 2, H2ac, mRNA (cDNA clone MGC:74460 IMAGE:3892650), complete cds. ///<br>Homo sapiens histone cluster 2, H2ac (HIST2H2AC), mRNA.                                                                                                                                                                                                                                                                       | histone cluster 2, H2ac                          | 0.000191411 | 1.266224894 |

|            |                                                                                                                                                                                                                                                                                                                                                                                                                                                                                                                                                                                                                                                         |                                                                                                                                |                    |                    |
|------------|---------------------------------------------------------------------------------------------------------------------------------------------------------------------------------------------------------------------------------------------------------------------------------------------------------------------------------------------------------------------------------------------------------------------------------------------------------------------------------------------------------------------------------------------------------------------------------------------------------------------------------------------------------|--------------------------------------------------------------------------------------------------------------------------------|--------------------|--------------------|
| HIST2H2BF  | <p>Similar to Histone H2b<br/> gene:ENSG00000203851 /// Similar to Histone H2b<br/> gene:ENSG00000203819 /// Histone H3<br/> gene:ENSG00000203818 /// Histone H2B type 2-F<br/> gene:ENSG00000203814 /// Homo sapiens cDNA FLJ56780 complete cds, highly similar to Histone H2B type 2-F. /// Homo sapiens cDNA FLJ56787 complete cds, highly similar to Histone H2B type 2-F. /// Homo sapiens histone cluster 2, H2bf, mRNA (cDNA clone MGC:131639 IMAGE:5224812), complete cds. /// Homo sapiens histone cluster 2, H2ba, mRNA (cDNA clone MGC:126029 IMAGE:40032203), complete cds. /// Homo sapiens histone cluster 2, H2bf (HIST2H2BF), mRNA.</p> | <p>histone cluster 1, H2bm /// histone cluster 2, H3, pseudogene 2 /// histone cluster 2, H2bf /// histone cluster 2, H2ba</p> | <p>0.000105439</p> | <p>1.242569531</p> |
| HIST2H2AA3 | <p>Histone H2A type 2-A<br/> gene:ENSG00000183558 /// Histone H2A type 2-A<br/> gene:ENSG00000203812 /// Homo sapiens histone H2A.2 mRNA, complete cds. /// Homo sapiens histone cluster 2, H2aa3 (HIST2H2AA3), mRNA. /// Homo sapiens histone cluster 2, H2aa4 (HIST2H2AA4), mRNA.</p>                                                                                                                                                                                                                                                                                                                                                                 | <p>histone cluster 2, H2aa3 /// histone cluster 2, H2aa4</p>                                                                   | <p>0.000274373</p> | <p>1.222531456</p> |
| HIST1H2BM  | <p>Histone H2B type 1-M<br/> gene:ENSG00000196374 /// Homo sapiens histone cluster 1, H2bm, mRNA (cDNA clone MGC:79335 IMAGE:7002058), complete cds. /// Homo sapiens histone cluster 1, H2bm (HIST1H2BM), mRNA.</p>                                                                                                                                                                                                                                                                                                                                                                                                                                    | <p>histone cluster 1, H2bm</p>                                                                                                 | <p>3.6798E-05</p>  | <p>1.289974724</p> |
| HIST1H1E   | <p>Histone H1.4<br/> gene:ENSG00000168298 /// Homo sapiens histone cluster 1, H1e, mRNA (cDNA clone MGC:116818 IMAGE:40003408), complete cds. /// Homo sapiens histone cluster 1, H1e (HIST1H1E), mRNA.</p>                                                                                                                                                                                                                                                                                                                                                                                                                                             | <p>histone cluster 1, H1e</p>                                                                                                  | <p>6.77285E-05</p> | <p>1.274697578</p> |



|            |                                                                                                                                                                                                                                                                                                                                                                                                                                                                                                                                                                                                                                                         |                                                                                                                                               |             |             |
|------------|---------------------------------------------------------------------------------------------------------------------------------------------------------------------------------------------------------------------------------------------------------------------------------------------------------------------------------------------------------------------------------------------------------------------------------------------------------------------------------------------------------------------------------------------------------------------------------------------------------------------------------------------------------|-----------------------------------------------------------------------------------------------------------------------------------------------|-------------|-------------|
| HIST2H3A   | <p>Histone H3 gene:ENSG00000203818<br/> /// Histone H3.2<br/> gene:ENSG00000183598 /// Histone H3.2<br/> gene:ENSG00000183598 /// Histone H3.2<br/> gene:ENSG00000203811 /// Histone H3.2<br/> gene:ENSG00000203852 /// Homo sapiens histone cluster 2, H3c, mRNA (cDNA clone MGC:104061 IMAGE:30915509), complete cds. /// Homo sapiens histone cluster 2, H3c (HIST2H3C), mRNA. /// Homo sapiens histone cluster 2, H3a (HIST2H3A), mRNA. /// Homo sapiens histone cluster 2, H3d (HIST2H3D), mRNA.</p>                                                                                                                                               | <p>histone cluster 2, H3c<br/> /// histone cluster 2, H3a<br/> /// histone cluster 2, H3d</p>                                                 | 7.08E-06    | 1.290707904 |
| HIST3H2A   | <p>Histone H2A type 3<br/> gene:ENSG00000181218 /// Homo sapiens histone cluster 3, H2a (HIST3H2A), mRNA.</p>                                                                                                                                                                                                                                                                                                                                                                                                                                                                                                                                           | <p>histone cluster 3, H2a</p>                                                                                                                 | 0.001136069 | 1.31228178  |
| HIST1H3J   | <p>Histone H3.1<br/> gene:ENSG00000197153 /// Homo sapiens histone cluster 1, H3j (HIST1H3J), mRNA.</p>                                                                                                                                                                                                                                                                                                                                                                                                                                                                                                                                                 | <p>histone cluster 1, H3j</p>                                                                                                                 | 6.05293E-05 | 1.346160535 |
| HIST2H3PS2 | <p>Similar to Histone H2b<br/> gene:ENSG00000203851 /// Similar to Histone H2b<br/> gene:ENSG00000203819 /// Histone H3<br/> gene:ENSG00000203818 /// Histone H2B type 2-F<br/> gene:ENSG00000203814 /// Homo sapiens cDNA FLJ56780 complete cds, highly similar to Histone H2B type 2-F. /// Homo sapiens cDNA FLJ56787 complete cds, highly similar to Histone H2B type 2-F. /// Homo sapiens histone cluster 2, H2bf, mRNA (cDNA clone MGC:131639 IMAGE:5224812), complete cds. /// Homo sapiens histone cluster 2, H2ba, mRNA (cDNA clone MGC:126029 IMAGE:40032203), complete cds. /// Homo sapiens histone cluster 2, H2bf (HIST2H2BF), mRNA.</p> | <p>histone cluster 1, H2bm<br/> /// histone cluster 2, H3, pseudogene 2<br/> /// histone cluster 2, H2bf<br/> /// histone cluster 2, H2ba</p> | 0.000105439 | 1.242569531 |

|           |                                                                                                                                                                                                                                                                |                         |                 |                      |
|-----------|----------------------------------------------------------------------------------------------------------------------------------------------------------------------------------------------------------------------------------------------------------------|-------------------------|-----------------|----------------------|
| HIST1H2BL | Histone H2B type 1-L<br>gene:ENSG00000185130 /// Homo sapiens histone cluster 1, H2bl (HIST1H2BL), mRNA.                                                                                                                                                       | histone cluster 1, H2bl | 0.003136<br>722 | 1.301821<br>445      |
| HIST1H1B  | Histone H1.5<br>gene:ENSG00000184357 /// Homo sapiens histone cluster 1, H1b, mRNA (cDNA clone MGC:95376 IMAGE:7216915), complete cds. /// Homo sapiens histone cluster 1, H1b (HIST1H1B), mRNA.                                                               | histone cluster 1, H1b  | 4.48375E<br>-05 | 1.359470<br>401      |
| HIST2H2AB | Histone H2A type 2-B<br>gene:ENSG00000184270 /// Homo sapiens histone cluster 2, H2ab (HIST2H2AB), mRNA.                                                                                                                                                       | histone cluster 2, H2ab | 3.93892E<br>-05 | 1.351416<br>002      |
| HIST1H2BK | cDNA FLJ56780, highly similar to Histone H2B type 2-F<br>gene:ENSG00000197903 /// Homo sapiens histone cluster 1, H2bk, mRNA (cDNA clone MGC:131989 IMAGE:4707078), complete cds. /// Homo sapiens histone cluster 1, H2bk (HIST1H2BK), mRNA.                  | histone cluster 1, H2bk | 2.72625E<br>-11 | -<br>2.243269<br>001 |
| HIST1H2BN | Histone H2B type 1-N<br>gene:ENSG00000220323 /// Histone H2B type 1-N<br>gene:ENSG00000220323 /// Homo sapiens histone cluster 1, H2bn, mRNA (cDNA clone MGC:125415 IMAGE:40021693), complete cds. /// Homo sapiens histone cluster 1, H2bn (HIST1H2BN), mRNA. | histone cluster 1, H2bn | 0.000468<br>844 | 1.312754<br>607      |
| HIST1H2BH | Histone H2B type 1-H<br>gene:ENSG00000197459 /// Homo sapiens histone cluster 1, H2bh, mRNA (cDNA clone MGC:116762 IMAGE:40002316), complete cds. /// Homo sapiens histone cluster 1, H2bh (HIST1H2BH), mRNA.                                                  | histone cluster 1, H2bh | 4.97124E<br>-05 | 1.263745<br>617      |

|           |                                                                                                                                                                                                                                                                                                                                                                                                                                                                                                                                                                                                                                                              |                                                                                                                                |                         |                         |
|-----------|--------------------------------------------------------------------------------------------------------------------------------------------------------------------------------------------------------------------------------------------------------------------------------------------------------------------------------------------------------------------------------------------------------------------------------------------------------------------------------------------------------------------------------------------------------------------------------------------------------------------------------------------------------------|--------------------------------------------------------------------------------------------------------------------------------|-------------------------|-------------------------|
| HIST2H2BA | <p>Similar to Histone H2b<br/> gene:ENSG00000203851 /// Similar to Histone H2b<br/> gene:ENSG00000203819 /// Histone H3<br/> gene:ENSG00000203818 /// Histone H2B type 2-F<br/> gene:ENSG00000203814 /// Homo sapiens cDNA FLJ56780 complete cds, highly similar to Histone H2B type 2-F.<br/> /// Homo sapiens cDNA FLJ56787 complete cds, highly similar to Histone H2B type 2-F. /// Homo sapiens histone cluster 2, H2bf, mRNA (cDNA clone MGC:131639 IMAGE:5224812), complete cds. /// Homo sapiens histone cluster 2, H2ba, mRNA (cDNA clone MGC:126029 IMAGE:40032203), complete cds. /// Homo sapiens histone cluster 2, H2bf (HIST2H2BF), mRNA.</p> | <p>histone cluster 1, H2bm /// histone cluster 2, H3, pseudogene 2 /// histone cluster 2, H2bf /// histone cluster 2, H2ba</p> | <p>0.000105<br/>439</p> | <p>1.242569<br/>531</p> |
| H2BFS     | <p>cDNA FLJ56780, highly similar to Histone H2B type 2-F<br/> gene:ENSG00000197903 /// cDNA FLJ56780, highly similar to Histone H2B type 2-F<br/> gene:ENSG00000197903 /// Homo sapiens histone cluster 1, H2bk, mRNA (cDNA clone MGC:131989 IMAGE:4707078), complete cds. /// Homo sapiens H2B histone family, member S, mRNA (cDNA clone MGC:161617 IMAGE:8992055), complete cds. /// Homo sapiens histone cluster 1, H2bk (HIST1H2BK), mRNA.</p>                                                                                                                                                                                                          | <p>histone cluster 1, H2bk /// H2B histone family, member S</p>                                                                | <p>0.001876<br/>47</p>  | <p>1.218709<br/>719</p> |

|          |                                                                                                                                                                                                                                                                                                                                                                                                                                                                                                                                                                                                                                                                                                                             |                              |             |             |
|----------|-----------------------------------------------------------------------------------------------------------------------------------------------------------------------------------------------------------------------------------------------------------------------------------------------------------------------------------------------------------------------------------------------------------------------------------------------------------------------------------------------------------------------------------------------------------------------------------------------------------------------------------------------------------------------------------------------------------------------------|------------------------------|-------------|-------------|
| H2AFY    | H2A histone family, member Y isoform 2 gene:ENSG00000113648<br>/// Isoform 2 of Core histone macro-H2A.1 gene:ENSG00000113648<br>/// Isoform 1 of Core histone macro-H2A.1 gene:ENSG00000113648<br>/// H2A histone family, member Y isoform 2 gene:ENSG00000113648<br>/// Homo sapiens H2A histone family, member Y, mRNA (cDNA clone MGC:110894 IMAGE:30348703), complete cds. /// Homo sapiens H2A histone family, member Y (H2AFY), transcript variant 3, mRNA. /// Homo sapiens H2A histone family, member Y (H2AFY), transcript variant 4, mRNA. /// Homo sapiens H2A histone family, member Y (H2AFY), transcript variant 2, mRNA. /// Homo sapiens H2A histone family, member Y (H2AFY), transcript variant 1, mRNA. | H2A histone family, member Y | 1.00695E-08 | 1.635137938 |
| HIST1H1D | Histone H1.3 gene:ENSG00000124575<br>/// Homo sapiens histone cluster 1, H1d, mRNA (cDNA clone MGC:132534 IMAGE:8143877), complete cds. /// Homo sapiens histone cluster 1, H1d (HIST1H1D), mRNA.                                                                                                                                                                                                                                                                                                                                                                                                                                                                                                                           | histone cluster 1, H1d       | 0.000117414 | 1.309558265 |
| HIST2H3D | Histone H3 gene:ENSG00000203818<br>/// Histone H3 gene:ENSG00000203818<br>/// Histone H3.2 gene:ENSG00000183598<br>/// Histone H3.2 gene:ENSG00000183598<br>/// Homo sapiens histone cluster 2, H3d (HIST2H3D), mRNA.                                                                                                                                                                                                                                                                                                                                                                                                                                                                                                       | histone cluster 2, H3d       | 0.000108608 | 1.287768241 |

|                           |                                                                                                                                                                                                                                                                                                                                                                                                                                        |                                                                                       |                   |                      |
|---------------------------|----------------------------------------------------------------------------------------------------------------------------------------------------------------------------------------------------------------------------------------------------------------------------------------------------------------------------------------------------------------------------------------------------------------------------------------|---------------------------------------------------------------------------------------|-------------------|----------------------|
| HIST2H4B                  | Histone H4 gene:ENSG00000183941<br>/// Histone H4<br>gene:ENSG00000183941 /// Histone H4<br>gene:ENSG00000183941 /// Histone H4<br>gene:ENSG00000182217<br>/// Histone H4<br>gene:ENSG00000182217 /// Histone H4<br>gene:ENSG00000182217 /// Homo sapiens histone cluster 2, H4b, mRNA (cDNA clone IMAGE:5113140). /// Homo sapiens histone cluster 2, H4b (HIST2H4B), mRNA. /// Homo sapiens histone cluster 2, H4a (HIST2H4A), mRNA. | histone cluster 2, H4a<br>/// histone cluster 2, H4b                                  | 1.07E-05          | -<br>1.411322<br>045 |
| <b>Functional Group 8</b> | <b>Transcript Description</b>                                                                                                                                                                                                                                                                                                                                                                                                          | <b>Gene Title</b>                                                                     | <b>Bayes.In p</b> | <b>Fold</b>          |
| PTGS2                     | Prostaglandin G/H synthase 2<br>gene:ENSG00000073756 /// Homo sapiens cyclooxygenase 2b mRNA, complete cds; alternatively spliced. /// Homo sapiens prostaglandin-endoperoxide synthase 2 (prostaglandin G/H synthase and cyclooxygenase) (PTGS2), mRNA.                                                                                                                                                                               | prostaglandin-endoperoxide synthase 2 (prostaglandin G/H synthase and cyclooxygenase) | 0.000943<br>863   | -<br>1.404109<br>712 |
| SDF2                      | Stromal cell-derived factor 2<br>gene:ENSG00000132581 /// Homo sapiens stromal cell-derived factor 2, mRNA (cDNA clone MGC:2977 IMAGE:3140716), complete cds. /// Homo sapiens stromal cell-derived factor 2 (SDF2), mRNA.                                                                                                                                                                                                             | stromal cell-derived factor 2                                                         | 0.002266<br>752   | 1.187169<br>025      |
| PSEN2                     | Isoform 1 of Presenilin-2<br>gene:ENSG00000143801 /// Isoform 2 of Presenilin-2<br>gene:ENSG00000143801 /// Presenilin 2<br>gene:ENSG00000143801 /// Presenilin 2<br>gene:ENSG00000143801 /// Homo sapiens presenilin 2 (Alzheimer disease 4), mRNA (cDNA clone MGC:12801 IMAGE:4131408), complete cds. /// Homo sapiens presenilin 2 (Alzheimer disease 4) (PSEN2), transcript variant 2, mRNA. /// Homo sapiens presenilin 2         | presenilin 2 (Alzheimer disease 4)                                                    | 0.002091<br>012   | -<br>1.214994<br>292 |

|        |                                                                                                                                                                                                                                                                                                         |                                                             |             |              |
|--------|---------------------------------------------------------------------------------------------------------------------------------------------------------------------------------------------------------------------------------------------------------------------------------------------------------|-------------------------------------------------------------|-------------|--------------|
|        | (Alzheimer disease 4) (PSEN2), transcript variant 1, mRNA.                                                                                                                                                                                                                                              |                                                             |             |              |
| SPCS1  | signal peptidase complex subunit 1 homolog gene:ENSG00000114902 /// Homo sapiens signal peptidase complex subunit 1 homolog (S. cerevisiae), mRNA (cDNA clone MGC:4899 IMAGE:3462307), complete cds. /// Homo sapiens signal peptidase complex subunit 1 homolog (S. cerevisiae) (SPCS1), mRNA.         | signal peptidase complex subunit 1 homolog (S. cerevisiae)  | 0.000448454 | 1.229641641  |
| PRKAB2 | 5'-AMP-activated protein kinase subunit beta-2 gene:ENSG00000131791 /// Homo sapiens protein kinase, AMP-activated, beta 2 non-catalytic subunit, mRNA (cDNA clone MGC:61468 IMAGE:6091476), complete cds. /// Homo sapiens protein kinase, AMP-activated, beta 2 non-catalytic subunit (PRKAB2), mRNA. | protein kinase, AMP-activated, beta 2 non-catalytic subunit | 7.74101E-05 | -1.244887053 |

|         |                                                                                                                                                                                                                                                                                                                                                                                                                                                                                                                                                                                                                                                                                                                                                                                                                                                                                                                                                                             |                                                                         |                         |                               |
|---------|-----------------------------------------------------------------------------------------------------------------------------------------------------------------------------------------------------------------------------------------------------------------------------------------------------------------------------------------------------------------------------------------------------------------------------------------------------------------------------------------------------------------------------------------------------------------------------------------------------------------------------------------------------------------------------------------------------------------------------------------------------------------------------------------------------------------------------------------------------------------------------------------------------------------------------------------------------------------------------|-------------------------------------------------------------------------|-------------------------|-------------------------------|
| B3GALT5 | <p>Beta-1,3-galactosyltransferase 5<br/> gene:ENSG00000183778 /// Beta-1,3-galactosyltransferase 5<br/> gene:ENSG00000183778 /// Beta-1,3-galactosyltransferase 5<br/> gene:ENSG00000183778 /// Beta-1,3-galactosyltransferase 5<br/> gene:ENSG00000183778 /// Homo sapiens beta-1,3-galactosyltransferase 5 (B3GALT5) mRNA, complete cds. /// Homo sapiens UDP-Gal:betaGlcNAc beta 1,3-galactosyltransferase, polypeptide 5 (B3GALT5), transcript variant 2, mRNA. /// Homo sapiens UDP-Gal:betaGlcNAc beta 1,3-galactosyltransferase, polypeptide 5 (B3GALT5), transcript variant 3, mRNA. /// Homo sapiens UDP-Gal:betaGlcNAc beta 1,3-galactosyltransferase, polypeptide 5 (B3GALT5), transcript variant 1, mRNA. /// Homo sapiens UDP-Gal:betaGlcNAc beta 1,3-galactosyltransferase, polypeptide 5 (B3GALT5), transcript variant 5, mRNA. /// Homo sapiens UDP-Gal:betaGlcNAc beta 1,3-galactosyltransferase, polypeptide 5 (B3GALT5), transcript variant 4, mRNA.</p> | <p>UDP-Gal:betaGlcNAc beta 1,3-galactosyltransferase, polypeptide 5</p> | <p>0.003988<br/>75</p>  | <p>-<br/>1.210837<br/>361</p> |
| PIGU    | <p>Isoform 1 of Phosphatidylinositol glycan anchor biosynthesis class U protein gene:ENSG00000101464 /// Isoform 2 of Phosphatidylinositol glycan anchor biosynthesis class U protein gene:ENSG00000101464 /// Homo sapiens transamidase complex subunit PIG-U (PIGU) mRNA, complete cds. /// Homo sapiens phosphatidylinositol glycan anchor biosynthesis, class U (PIGU), mRNA.</p>                                                                                                                                                                                                                                                                                                                                                                                                                                                                                                                                                                                       | <p>phosphatidylinositol glycan anchor biosynthesis, class U</p>         | <p>0.001502<br/>803</p> | <p>1.201502<br/>59</p>        |

|         |                                                                                                                                                                                                                                                                                                                                                                                                                                                                        |                                                                                                  |             |              |
|---------|------------------------------------------------------------------------------------------------------------------------------------------------------------------------------------------------------------------------------------------------------------------------------------------------------------------------------------------------------------------------------------------------------------------------------------------------------------------------|--------------------------------------------------------------------------------------------------|-------------|--------------|
| GALNT11 | Isoform 1 of Polypeptide N-acetylgalactosaminyltransferase 11 gene:ENSG00000178234 /// Homo sapiens cDNA FLJ42944 fis, clone BRSTN2004863, highly similar to PolypeptideN-acetylgalactosaminyltransferase 11 (EC 2.4.1.41). /// Homo sapiens UDP-N-acetyl-alpha-D-galactosamine:polypeptide N-acetylgalactosaminyltransferase 11 (GalNAc-T11) (GALNT11), mRNA.                                                                                                         | UDP-N-acetyl-alpha-D-galactosamine:polypeptide N-acetylgalactosaminyltransferase 11 (GalNAc-T11) | 6.29581E-06 | -1.315071526 |
| A4GALT  | Lactosylceramide 4-alpha-galactosyltransferase gene:ENSG00000128274 /// Lactosylceramide 4-alpha-galactosyltransferase gene:ENSG00000128274 /// Lactosylceramide 4-alpha-galactosyltransferase gene:ENSG00000128274 /// Lactosylceramide 4-alpha-galactosyltransferase gene:ENSG00000128274 /// Homo sapiens alpha 1,4-galactosyltransferase, mRNA (cDNA clone MGC:9631 IMAGE:3913851), complete cds. /// Homo sapiens alpha 1,4-galactosyltransferase (A4GALT), mRNA. | alpha 1,4-galactosyltransferase                                                                  | 0.006056806 | -1.23334869  |
| GALNT5  | Polypeptide N-acetylgalactosaminyltransferase 5 gene:ENSG00000136542 /// Homo sapiens UDP-N-acetyl-alpha-D-galactosamine:polypeptide N-acetylgalactosaminyltransferase 5 (GalNAc-T5), mRNA (cDNA clone MGC:164948 IMAGE:40148207), complete cds. /// Homo sapiens UDP-N-acetyl-alpha-D-galactosamine:polypeptide N-acetylgalactosaminyltransferase 5 (GalNAc-T5) (GALNT5), mRNA.                                                                                       | UDP-N-acetyl-alpha-D-galactosamine:polypeptide N-acetylgalactosaminyltransferase 5 (GalNAc-T5)   | 0.002734554 | -1.341674351 |



|        |                                                                                                                                                                                                                                                                                                                                                                                                                                                                                         |                                                                                          |                 |                      |
|--------|-----------------------------------------------------------------------------------------------------------------------------------------------------------------------------------------------------------------------------------------------------------------------------------------------------------------------------------------------------------------------------------------------------------------------------------------------------------------------------------------|------------------------------------------------------------------------------------------|-----------------|----------------------|
| SAR1B  | GTP-binding protein SAR1b<br>gene:ENSG00000152700 /// GTP-binding protein SAR1b<br>gene:ENSG00000152700 /// GTP-binding protein SAR1b<br>gene:ENSG00000152700 /// Homo sapiens GTP binding protein mRNA, complete cds. /// Homo sapiens SAR1 homolog B (S. cerevisiae) (SAR1B), transcript variant 2, mRNA. /// Homo sapiens SAR1 homolog B (S. cerevisiae) (SAR1B), transcript variant 1, mRNA.                                                                                        | SAR1 homolog B (S. cerevisiae)                                                           | 0.007631<br>315 | -<br>1.149369<br>021 |
| HMGCS1 | Hydroxymethylglutaryl-CoA synthase, cytoplasmic gene:ENSG00000112972 /// Homo sapiens 3-hydroxy-3-methylglutaryl-Coenzyme A synthase 1 (soluble), mRNA (cDNA clone MGC:90332 IMAGE:4443624), complete cds. /// Homo sapiens 3-hydroxy-3-methylglutaryl-Coenzyme A synthase 1 (soluble) (HMGCS1), transcript variant 1, mRNA. /// Homo sapiens 3-hydroxy-3-methylglutaryl-Coenzyme A synthase 1 (soluble) (HMGCS1), transcript variant 2, mRNA.                                          | 3-hydroxy-3-methylglutaryl-Coenzyme A synthase 1 (soluble)                               | 0.007339<br>614 | 1.183424<br>159      |
| ALG6   | Dolichyl pyrophosphate Man9GlcNAc2 alpha-1,3-glucosyltransferase<br>gene:ENSG00000088035 /// Dolichyl pyrophosphate Man9GlcNAc2 alpha-1,3-glucosyltransferase<br>gene:ENSG00000088035 /// Asparagine-linked glycosylation 6 homolog gene:ENSG00000088035 /// Homo sapiens dolichyl-P-Glc:Man9GlcNAc2-PP-dolichyl glucosyltransferase (ALG6) mRNA, complete cds. /// Homo sapiens asparagine-linked glycosylation 6 homolog (S. cerevisiae, alpha-1,3-glucosyltransferase) (ALG6), mRNA. | asparagine-linked glycosylation 6, alpha-1,3-glucosyltransferase homolog (S. cerevisiae) | 0.004797<br>828 | 1.180850<br>212      |

|        |                                                                                                                                                                                                                                                                                                                                                                                                                                                                                                                                                              |                                                                       |             |             |
|--------|--------------------------------------------------------------------------------------------------------------------------------------------------------------------------------------------------------------------------------------------------------------------------------------------------------------------------------------------------------------------------------------------------------------------------------------------------------------------------------------------------------------------------------------------------------------|-----------------------------------------------------------------------|-------------|-------------|
| ERO1L  | Putative uncharacterized protein ERO1L gene:ENSG00000197930 /// ERO1-like protein alpha gene:ENSG00000197930 /// Homo sapiens ERO1-like protein (ERO1-L) mRNA, complete cds. /// Homo sapiens ERO1-like (S. cerevisiae) (ERO1L), mRNA.                                                                                                                                                                                                                                                                                                                       | ERO1-like (S. cerevisiae)                                             | 5.9695E-05  | 1.258963743 |
| CYP1B1 | Cytochrome P450 1B1 gene:ENSG00000138061 /// Cytochrome P450 1B1 gene:ENSG00000138061 /// Human dioxin-inducible cytochrome P450 (CYP1B1) mRNA, complete cds. /// Homo sapiens cytochrome P450, family 1, subfamily B, polypeptide 1 (CYP1B1), mRNA.                                                                                                                                                                                                                                                                                                         | cytochrome P450, family 1, subfamily B, polypeptide 1                 | 0.003705431 | 1.319220391 |
| IDI1   | isopentenyl-diphosphate delta isomerase gene:ENSG00000067064 /// Homo sapiens isopentenyl-diphosphate delta isomerase 1, mRNA (cDNA clone MGC:71798 IMAGE:30337530), complete cds. /// Homo sapiens isopentenyl-diphosphate delta isomerase 1 (IDI1), mRNA.                                                                                                                                                                                                                                                                                                  | isopentenyl-diphosphate delta isomerase 1                             | 0.000835945 | 1.184844529 |
| SSR4   | Translocon-associated protein subunit delta precursor gene:ENSG00000180879 /// Translocon-associated protein subunit delta precursor gene:ENSG00000180879 /// Translocon-associated protein subunit delta precursor gene:ENSG00000180879 /// Putative uncharacterized protein SSR4 gene:ENSG00000180879 /// Homo sapiens signal sequence receptor, delta (translocon-associated protein delta), mRNA (cDNA clone MGC:5151 IMAGE:2900758), complete cds. /// Homo sapiens signal sequence receptor, delta (translocon-associated protein delta) (SSR4), mRNA. | signal sequence receptor, delta (translocon-associated protein delta) | 0.009030827 | 1.182949288 |

|        |                                                                                                                                                                                                                                                                                                                                                                                                                                                                                                                                                                                                                                                                                                                                                                                                                                                                           |                                                                                                                           |             |             |
|--------|---------------------------------------------------------------------------------------------------------------------------------------------------------------------------------------------------------------------------------------------------------------------------------------------------------------------------------------------------------------------------------------------------------------------------------------------------------------------------------------------------------------------------------------------------------------------------------------------------------------------------------------------------------------------------------------------------------------------------------------------------------------------------------------------------------------------------------------------------------------------------|---------------------------------------------------------------------------------------------------------------------------|-------------|-------------|
| FDPS   | Farnesyl pyrophosphate synthetase<br>gene:ENSG00000160752 /// Farnesyl pyrophosphate synthetase<br>gene:ENSG00000160752 /// Homo sapiens farnesyl diphosphate synthase (farnesyl pyrophosphate synthetase, dimethylallyltranstransferase, geranyltranstransferase), mRNA (cDNA clone MGC:15352 IMAGE:4132071), complete cds. /// Homo sapiens farnesyl diphosphate synthase (farnesyl pyrophosphate synthetase, dimethylallyltranstransferase, geranyltranstransferase) (FDPS), transcript variant 3, mRNA. /// Homo sapiens farnesyl diphosphate synthase (farnesyl pyrophosphate synthetase, dimethylallyltranstransferase, geranyltranstransferase) (FDPS), transcript variant 1, mRNA. /// Homo sapiens farnesyl diphosphate synthase (farnesyl pyrophosphate synthetase, dimethylallyltranstransferase, geranyltranstransferase) (FDPS), transcript variant 2, mRNA. | farnesyl diphosphate synthase (farnesyl pyrophosphate synthetase, dimethylallyltranstransferase, geranyltranstransferase) | 0.001186871 | 1.181324614 |
| FDFT1  | Squalene synthetase<br>gene:ENSG00000079459 /// Homo sapiens farnesyl-diphosphate farnesyltransferase 1, mRNA (cDNA clone MGC:4480 IMAGE:2961623), complete cds. /// Homo sapiens farnesyl-diphosphate farnesyltransferase 1 (FDFT1), mRNA.                                                                                                                                                                                                                                                                                                                                                                                                                                                                                                                                                                                                                               | farnesyl-diphosphate farnesyltransferase 1                                                                                | 0.004783371 | 1.170365198 |
| UBE2J1 | Ubiquitin-conjugating enzyme E2 J1<br>gene:ENSG00000198833 /// Homo sapiens mRNA full length insert cDNA clone EUROIMAGE 1658099. /// Homo sapiens ubiquitin-conjugating enzyme E2, J1 (UBC6 homolog, yeast) (UBE2J1), mRNA.                                                                                                                                                                                                                                                                                                                                                                                                                                                                                                                                                                                                                                              | ubiquitin-conjugating enzyme E2, J1 (UBC6 homolog, yeast)                                                                 | 9.10548E-05 | 1.323235774 |

|        |                                                                                                                                                                                                                                                                                                                                    |                                                             |                 |                      |
|--------|------------------------------------------------------------------------------------------------------------------------------------------------------------------------------------------------------------------------------------------------------------------------------------------------------------------------------------|-------------------------------------------------------------|-----------------|----------------------|
| PIGV   | GPI mannosyltransferase 2<br>gene:ENSG00000060642 /// GPI mannosyltransferase 2<br>gene:ENSG00000060642 /// Homo sapiens phosphatidylinositol glycan anchor biosynthesis, class V, mRNA (cDNA clone MGC:8856 IMAGE:3890907), complete cds. /// Homo sapiens phosphatidylinositol glycan anchor biosynthesis, class V (PIGV), mRNA. | phosphatidylinositol glycan anchor biosynthesis, class V    | 0.003604<br>587 | 1.223380<br>356      |
| LMAN2L | Isoform 2 of VIP36-like protein<br>gene:ENSG00000114988 /// Isoform 1 of VIP36-like protein<br>gene:ENSG00000114988 /// Homo sapiens clone DNA50911 AATL368 (UNQ368) mRNA, complete cds. /// Homo sapiens lectin, mannose-binding 2-like (LMAN2L), mRNA.                                                                           | lectin, mannose-binding 2-like                              | 0.007512<br>864 | 1.166835<br>736      |
| NDST1  | Isoform 1 of Bifunctional heparan sulfate N-deacetylase/N-sulfotransferase 1<br>gene:ENSG00000070614 /// Human heparan sulfate-N-deacetylase/N-sulfotransferase mRNA, clone HSST, complete cds. /// Homo sapiens N-deacetylase/N-sulfotransferase (heparan glucosaminyl) 1 (NDST1), mRNA.                                          | N-deacetylase/N-sulfotransferase (heparan glucosaminyl) 1   | 0.004813<br>946 | 1.154625<br>255      |
| CHST9  | GalNAc-4-sulfotransferase 2<br>gene:ENSG00000154080 /// Homo sapiens clone DNA108682 CHST9 (UNQ2549) mRNA, complete cds. /// Homo sapiens carbohydrate (N-acetylgalactosamine 4-0) sulfotransferase 9 (CHST9), mRNA.                                                                                                               | carbohydrate (N-acetylgalactosamine 4-0) sulfotransferase 9 | 0.001430<br>994 | -<br>1.282843<br>659 |
| EBP    | 3-beta-hydroxysteroid-Delta(8),Delta(7)-isomerase<br>gene:ENSG00000147155 /// Homo sapiens emopamil binding protein (sterol isomerase), mRNA (cDNA clone MGC:29952 IMAGE:5106272), complete cds. /// Homo sapiens emopamil binding protein (sterol isomerase) (EBP), mRNA.                                                         | emopamil binding protein (sterol isomerase)                 | 2.22369E<br>-05 | 1.291827<br>881      |

|         |                                                                                                                                                                                                                                                                                                                                                                                                                                                                                                                                                                                                                                               |                                                        |                 |                 |
|---------|-----------------------------------------------------------------------------------------------------------------------------------------------------------------------------------------------------------------------------------------------------------------------------------------------------------------------------------------------------------------------------------------------------------------------------------------------------------------------------------------------------------------------------------------------------------------------------------------------------------------------------------------------|--------------------------------------------------------|-----------------|-----------------|
| MECR    | trans-2-enoyl-CoA reductase, mitochondrial isoform b<br>gene:ENSG00000116353 /// Mitochondrial trans-2-enoyl-CoA reductase gene:ENSG00000116353 /// trans-2-enoyl-CoA reductase, mitochondrial isoform b gene:ENSG00000116353 /// Trans-2-enoyl-CoA reductase, mitochondrial gene:ENSG00000116353 /// Homo sapiens CGI-63 protein mRNA, complete cds. /// Homo sapiens mitochondrial trans-2-enoyl-CoA reductase (MECR), nuclear gene encoding mitochondrial protein, transcript variant 1, mRNA. /// Homo sapiens mitochondrial trans-2-enoyl-CoA reductase (MECR), nuclear gene encoding mitochondrial protein, transcript variant 2, mRNA. | mitochondrial trans-2-enoyl-CoA reductase              | 0.002235<br>35  | 1.183629<br>316 |
| DHCR7   | 7-dehydrocholesterol reductase<br>gene:ENSG00000172893 /// 7-dehydrocholesterol reductase gene:ENSG00000172893 /// Homo sapiens delta7-sterol reductase mRNA, complete cds. /// Homo sapiens 7-dehydrocholesterol reductase (DHCR7), mRNA.                                                                                                                                                                                                                                                                                                                                                                                                    | 7-dehydrocholesterol reductase                         | 0.000110<br>779 | 1.266709<br>411 |
| CYP51A1 | cytochrome P450, family 51<br>gene:ENSG0000001630 /// Human lanosterol 14-demethylase cytochrome P450 (CYP51) mRNA, complete cds. /// Homo sapiens cytochrome P450, family 51, subfamily A, polypeptide 1 (CYP51A1), mRNA.                                                                                                                                                                                                                                                                                                                                                                                                                    | cytochrome P450, family 51, subfamily A, polypeptide 1 | 0.000529<br>737 | 1.229132<br>469 |
| SQLE    | Squalene monooxygenase<br>gene:ENSG00000104549 /// Homo sapiens mRNA for squalene epoxidase, complete cds. /// Homo sapiens squalene epoxidase (SQLE), mRNA.                                                                                                                                                                                                                                                                                                                                                                                                                                                                                  | squalene epoxidase                                     | 0.009875<br>803 | 1.130439<br>884 |

|       |                                                                                                                                                                                                                                                                                                                                                                                                     |                                             |                 |                      |
|-------|-----------------------------------------------------------------------------------------------------------------------------------------------------------------------------------------------------------------------------------------------------------------------------------------------------------------------------------------------------------------------------------------------------|---------------------------------------------|-----------------|----------------------|
| FADS2 | Isoform 2 of Fatty acid desaturase 2<br>gene:ENSG00000134824 /// Isoform<br>1 of Fatty acid desaturase 2<br>gene:ENSG00000134824 /// Homo<br>sapiens p5327 mRNA, complete cds.<br>/// Homo sapiens fatty acid<br>desaturase 2 (FADS2), mRNA.                                                                                                                                                        | fatty acid desaturase 2                     | 0.008103<br>918 | 1.142409<br>322      |
| FADS3 | Fatty acid desaturase 3<br>gene:ENSG00000149485 /// Homo<br>sapiens fatty acid desaturase 3<br>(FADS3) mRNA, complete cds. ///<br>Homo sapiens fatty acid desaturase 3<br>(FADS3), mRNA.                                                                                                                                                                                                            | fatty acid desaturase 3                     | 0.000260<br>387 | -<br>1.226671<br>196 |
| DERL1 | Derlin-1 gene:ENSG00000136986 ///<br>cdna:known<br>chromosome:NCBI36:8:124095691:12<br>4096380:-1 gene:ENSG00000220455<br>/// Homo sapiens clone DNA16435<br>SDIG243 (UNQ243) mRNA, complete<br>cds. /// Homo sapiens Der1-like<br>domain family, member 1 (DERL1),<br>transcript variant 1, mRNA. /// Homo<br>sapiens Der1-like domain family,<br>member 1 (DERL1), transcript variant<br>2, mRNA. | Der1-like domain<br>family, member 1        | 0.008077<br>664 | 1.136355<br>696      |
| PECR  | Peroxisomal trans-2-enoyl-CoA<br>reductase gene:ENSG00000115425<br>/// Homo sapiens peroxisomal trans<br>2-enoyl CoA reductase mRNA,<br>complete cds. /// Homo sapiens<br>peroxisomal trans-2-enoyl-CoA<br>reductase (PECR), mRNA.                                                                                                                                                                  | peroxisomal trans-2-<br>enoyl-CoA reductase | 0.000520<br>923 | 1.345997<br>976      |
| ALOX5 | Arachidonate 5-lipoxygenase variant<br>(Fragment) gene:ENSG00000215136<br>/// Arachidonate 5-lipoxygenase<br>gene:ENSG00000012779 /// Human<br>5-lipoxygenase mRNA, complete cds.<br>/// Homo sapiens arachidonate 5-<br>lipoxygenase (ALOX5), mRNA.                                                                                                                                                | arachidonate 5-<br>lipoxygenase             | 2.36753E<br>-06 | -<br>1.569368<br>707 |

|        |                                                                                                                                                                                                                                                                                                                                                                                                                                                                                  |                                                                                |             |                  |
|--------|----------------------------------------------------------------------------------------------------------------------------------------------------------------------------------------------------------------------------------------------------------------------------------------------------------------------------------------------------------------------------------------------------------------------------------------------------------------------------------|--------------------------------------------------------------------------------|-------------|------------------|
| MGST2  | Microsomal glutathione S-transferase 2 gene:ENSG00000085871 /// Homo sapiens microsomal glutathione S-transferase 2, mRNA (cDNA clone MGC:14097 IMAGE:3937750), complete cds. /// Homo sapiens microsomal glutathione S-transferase 2 (MGST2), mRNA.                                                                                                                                                                                                                             | microsomal glutathione S-transferase 2                                         | 8.47008E-06 | 1.513497757      |
| FKTN   | Fukutin gene:ENSG00000106692 /// 26 kDa protein gene:ENSG00000106692 /// 27 kDa protein gene:ENSG00000106692 /// Homo sapiens FCMD mRNA for fukutin, complete cds. /// Homo sapiens fukutin (FKTN), transcript variant 2, mRNA. /// Homo sapiens fukutin (FKTN), transcript variant 1, mRNA.                                                                                                                                                                                     | fukutin                                                                        | 0.003004349 | 1.219800207      |
| ELOVL1 | Elongation of very long chain fatty acids protein 1 gene:ENSG00000066322 /// Homo sapiens elongation of very long chain fatty acids (FEN1/Elo2, SUR4/Elo3, yeast)-like 1, mRNA (cDNA clone MGC:701 IMAGE:3347272), complete cds. /// Homo sapiens elongation of very long chain fatty acids (FEN1/Elo2, SUR4/Elo3, yeast)-like 1 (ELOVL1), mRNA.                                                                                                                                 | elongation of very long chain fatty acids (FEN1/Elo2, SUR4/Elo3, yeast)-like 1 | 0.00075859  | 1.232326481      |
| ANTXR2 | Isoform 4 of Anthrax toxin receptor 2 gene:ENSG00000163297 /// ANTXR2 protein gene:ENSG00000163297 /// Isoform 4 of Anthrax toxin receptor 2 gene:ENSG00000163297 /// Isoform 1 of Anthrax toxin receptor 2 gene:ENSG00000163297 /// Isoform 2 of Anthrax toxin receptor 2 gene:ENSG00000163297 /// Isoform 3 of Anthrax toxin receptor 2 gene:ENSG00000163297 /// Homo sapiens cDNA FLJ31074 fis, clone HSYRA2001476. /// Homo sapiens anthrax toxin receptor 2 (ANTXR2), mRNA. | anthrax toxin receptor 2                                                       | 0.000582301 | -<br>1.248326997 |

|       |                                                                                                                                                                                                                                                                                                                                                                                                                                                                |                                                                  |                 |                      |
|-------|----------------------------------------------------------------------------------------------------------------------------------------------------------------------------------------------------------------------------------------------------------------------------------------------------------------------------------------------------------------------------------------------------------------------------------------------------------------|------------------------------------------------------------------|-----------------|----------------------|
| LASS5 | LAG1 longevity assurance homolog 5<br>gene:ENSG00000139624 /// cDNA FLJ59438, highly similar to LAG1 longevity assurance homolog 5<br>gene:ENSG00000139624 /// Homo sapiens LAG1 homolog, ceramide synthase 5, mRNA (cDNA clone IMAGE:4826780), complete cds. /// Homo sapiens LAG1 homolog, ceramide synthase 5 (LASS5), mRNA.                                                                                                                                | LAG1 homolog, ceramide synthase 5                                | 0.006949<br>266 | -<br>1.156374<br>089 |
| OLAH  | Oleoyl-ACP hydrolase<br>gene:ENSG00000152463 /// Thioesterase domain containing 1, isoform CRA_a<br>gene:ENSG00000152463 /// S-acyl fatty acid synthase thioesterase, medium chain<br>gene:ENSG00000152463 /// Homo sapiens oleoyl-ACP hydrolase, mRNA (cDNA clone MGC:51852 IMAGE:5742377), complete cds. /// Homo sapiens oleoyl-ACP hydrolase (OLAH), transcript variant 1, mRNA. /// Homo sapiens oleoyl-ACP hydrolase (OLAH), transcript variant 2, mRNA. | oleoyl-ACP hydrolase                                             | 6.65941E<br>-06 | -<br>1.729750<br>177 |
| CDS1  | Phosphatidate cytidyltransferase 1<br>gene:ENSG00000163624 /// Human CDP-diacylglycerol synthase mRNA, complete cds. /// Homo sapiens CDP-diacylglycerol synthase (phosphatidate cytidyltransferase) 1 (CDS1), mRNA.                                                                                                                                                                                                                                           | CDP-diacylglycerol synthase (phosphatidate cytidyltransferase) 1 | 0.003871<br>784 | -<br>1.179875<br>975 |
| SCD   | Acyl-CoA desaturase<br>gene:ENSG00000099194 /// Homo sapiens stearoyl-CoA desaturase (SCD) mRNA, complete cds. /// Homo sapiens stearoyl-CoA desaturase (delta-9-desaturase) (SCD), mRNA.                                                                                                                                                                                                                                                                      | stearoyl-CoA desaturase (delta-9-desaturase)                     | 0.001709<br>222 | 1.205611<br>478      |



|       |                                                                                                                                                                                                                                                                                                                                                                                                                                                                                        |                                                          |                 |                      |
|-------|----------------------------------------------------------------------------------------------------------------------------------------------------------------------------------------------------------------------------------------------------------------------------------------------------------------------------------------------------------------------------------------------------------------------------------------------------------------------------------------|----------------------------------------------------------|-----------------|----------------------|
| PIGS  | Isoform 2 of GPI transamidase component PIG-S<br>gene:ENSG00000087111 /// Isoform 1 of GPI transamidase component PIG-S gene:ENSG00000087111 /// HSPC309 (Fragment)<br>gene:ENSG00000087111 /// Homo sapiens clone DNA94713 PIGS (UNQ1873) mRNA, complete cds. /// Homo sapiens phosphatidylinositol glycan anchor biosynthesis, class S (PIGS), mRNA.                                                                                                                                 | phosphatidylinositol glycan anchor biosynthesis, class S | 0.005657<br>295 | 1.179282<br>937      |
| FUT11 | Isoform 2 of Alpha-(1,3)-fucosyltransferase 11<br>gene:ENSG00000196968 /// Isoform 1 of Alpha-(1,3)-fucosyltransferase 11<br>gene:ENSG00000196968 /// Homo sapiens fucosyltransferase 11 (alpha (1,3) fucosyltransferase), mRNA (cDNA clone MGC:33202 IMAGE:5271548), complete cds. /// Homo sapiens fucosyltransferase 11 (alpha (1,3) fucosyltransferase) (FUT11), mRNA.                                                                                                             | fucosyltransferase 11 (alpha (1,3) fucosyltransferase)   | 0.001430<br>649 | 1.246784<br>793      |
| PLP1  | cDNA FLJ54326, highly similar to Myelin proteolipid protein<br>gene:ENSG00000123560 /// 31 kDa protein gene:ENSG00000123560 /// Isoform 1 of Myelin proteolipid protein gene:ENSG00000123560 /// Human myelin proteolipid protein mRNA, complete cds. /// Homo sapiens proteolipid protein 1 (PLP1), transcript variant 3, mRNA. /// Homo sapiens proteolipid protein 1 (PLP1), transcript variant 2, mRNA. /// Homo sapiens proteolipid protein 1 (PLP1), transcript variant 1, mRNA. | proteolipid protein 1                                    | 0.000798<br>801 | 1.217445<br>851      |
| LASS6 | LASS6 protein<br>gene:ENSG00000172292 /// LAG1 longevity assurance homolog 6<br>gene:ENSG00000172292 /// Homo sapiens LAG1 homolog, ceramide synthase 6, mRNA (cDNA clone MGC:129949 IMAGE:40031838), complete cds. /// Homo sapiens LAG1                                                                                                                                                                                                                                              | LAG1 homolog, ceramide synthase 6                        | 0.004738<br>64  | -<br>1.155431<br>587 |

|         |                                                                                                                                                                                                                                                                                                                                                                                                                                                                                                                             |                                        |                 |                 |
|---------|-----------------------------------------------------------------------------------------------------------------------------------------------------------------------------------------------------------------------------------------------------------------------------------------------------------------------------------------------------------------------------------------------------------------------------------------------------------------------------------------------------------------------------|----------------------------------------|-----------------|-----------------|
|         | homolog, ceramide synthase 6 (LASS6), mRNA.                                                                                                                                                                                                                                                                                                                                                                                                                                                                                 |                                        |                 |                 |
| INSIG1  | insulin induced gene 1 isoform 2<br>gene:ENSG00000186480 /// Insulin-induced gene 1 protein<br>gene:ENSG00000186480 /// insulin induced gene 1 isoform 3<br>gene:ENSG00000186480 /// Homo sapiens insulin induced gene 1, mRNA (cDNA clone MGC:1405 IMAGE:3546928), complete cds. /// Homo sapiens insulin induced gene 1 (INSIG1), transcript variant 1, mRNA. /// Homo sapiens insulin induced gene 1 (INSIG1), transcript variant 2, mRNA. /// Homo sapiens insulin induced gene 1 (INSIG1), transcript variant 3, mRNA. | insulin induced gene 1                 | 0.000115<br>835 | 1.293557<br>142 |
| TRAPPC3 | Trafficking protein particle complex subunit 3 gene:ENSG00000054116 /// Putative uncharacterized protein TRAPPC3 gene:ENSG00000054116 /// Putative uncharacterized protein TRAPPC3 gene:ENSG00000054116 /// Putative uncharacterized protein TRAPPC3 gene:ENSG00000054116 /// Homo sapiens trafficking protein particle complex 3, mRNA (cDNA clone MGC:2035 IMAGE:3051295), complete cds. /// Homo sapiens trafficking protein particle complex 3 (TRAPPC3), mRNA.                                                         | trafficking protein particle complex 3 | 0.008055<br>62  | 1.153669<br>285 |

|       |                                                                                                                                                                                                                                                                                                                                                                                                                                                                                                                                                                                                                                                                                                                                                                                                                                                                                                                                |                                          |             |             |
|-------|--------------------------------------------------------------------------------------------------------------------------------------------------------------------------------------------------------------------------------------------------------------------------------------------------------------------------------------------------------------------------------------------------------------------------------------------------------------------------------------------------------------------------------------------------------------------------------------------------------------------------------------------------------------------------------------------------------------------------------------------------------------------------------------------------------------------------------------------------------------------------------------------------------------------------------|------------------------------------------|-------------|-------------|
| MCFD2 | <p>cdna:known<br/> chromosome:NCBI36:2:46982517:46996697:-1 gene:ENSG00000180398 ///</p> <p>cdna:known<br/> chromosome:NCBI36:2:46982517:46996459:-1 gene:ENSG00000180398 ///</p> <p>cdna:known<br/> chromosome:NCBI36:2:46982517:46996423:-1 gene:ENSG00000180398 ///</p> <p>Multiple coagulation factor deficiency protein 2 gene:ENSG00000180398 ///</p> <p>cdna:known<br/> chromosome:NCBI36:2:46985601:47022375:-1 gene:ENSG00000180398 ///</p> <p>cdna:known<br/> chromosome:NCBI36:2:46985914:46996453:-1 gene:ENSG00000180398 ///</p> <p>cdna:known<br/> chromosome:NCBI36:2:46986011:47022498:-1 gene:ENSG00000180398 ///</p> <p>cdna:known<br/> chromosome:NCBI36:2:46986037:46996755:-1 gene:ENSG00000180398 ///</p> <p>Homo sapiens multiple coagulation factor deficiency 2, mRNA (cDNA clone MGC:9537 IMAGE:3925166), complete cds. /// Homo sapiens multiple coagulation factor deficiency 2 (MCFD2), mRNA.</p> | multiple coagulation factor deficiency 2 | 0.001766448 | 1.189254788 |
| CYB5A | <p>Isoform 1 of Cytochrome b5 gene:ENSG00000166347 /// Isoform 2 of Cytochrome b5 gene:ENSG00000166347 /// Putative uncharacterized protein CYB5A gene:ENSG00000166347 /// Homo sapiens mRNA for cytochrome b-5 isoform 1 variant protein. /// Homo sapiens cytochrome b5 type A (microsomal) (CYB5A), transcript variant 1, mRNA. /// Homo sapiens cytochrome b5 type A (microsomal) (CYB5A), transcript variant 2, mRNA.</p>                                                                                                                                                                                                                                                                                                                                                                                                                                                                                                 | cytochrome b5 type A (microsomal)        | 0.004823073 | 1.187411258 |

|         |                                                                                                                                                                                                                                                                                                                                                                                                                                                                                                                                                                                           |                                                        |             |             |
|---------|-------------------------------------------------------------------------------------------------------------------------------------------------------------------------------------------------------------------------------------------------------------------------------------------------------------------------------------------------------------------------------------------------------------------------------------------------------------------------------------------------------------------------------------------------------------------------------------------|--------------------------------------------------------|-------------|-------------|
| CYP26A1 | cytochrome P450, family 26, subfamily A, polypeptide 1 isoform 2<br>gene:ENSG00000095596 ///<br>Cytochrome P450 26A1<br>gene:ENSG00000095596 ///<br>cytochrome P450, family 26, subfamily A, polypeptide 1 isoform 2<br>gene:ENSG00000095596 /// Homo sapiens cDNA PSEC0064 fis, clone NT2RP2000957, highly similar to CYTOCHROME P450 26 (EC 1.14.-.-).<br>/// Homo sapiens cytochrome P450, family 26, subfamily A, polypeptide 1 (CYP26A1), transcript variant 1, mRNA. /// Homo sapiens cytochrome P450, family 26, subfamily A, polypeptide 1 (CYP26A1), transcript variant 2, mRNA. | cytochrome P450, family 26, subfamily A, polypeptide 1 | 7.1195E-09  | 1.832081174 |
| CYP2R1  | Vitamin D 25-hydroxylase<br>gene:ENSG00000186104 /// Homo sapiens cytochrome P450 2R1 (CYP2R1) mRNA, complete cds. ///<br>Homo sapiens cytochrome P450, family 2, subfamily R, polypeptide 1 (CYP2R1), mRNA.                                                                                                                                                                                                                                                                                                                                                                              | cytochrome P450, family 2, subfamily R, polypeptide 1  | 0.000786597 | 1.255785406 |
| TMEM109 | Transmembrane protein 109<br>gene:ENSG00000110108 /// Homo sapiens transmembrane protein 109, mRNA (cDNA clone MGC:5508 IMAGE:3453616), complete cds. ///<br>Homo sapiens transmembrane protein 109 (TMEM109), mRNA.                                                                                                                                                                                                                                                                                                                                                                      | transmembrane protein 109                              | 0.001754008 | 1.194580934 |

|         |                                                                                                                                                                                                                                                                                                                                                                                                                                                                                                                                                                                                                                                                                                                                                                                                                                                                                                                                                                                                                                                                                                  |                                                                                                       |                         |                               |
|---------|--------------------------------------------------------------------------------------------------------------------------------------------------------------------------------------------------------------------------------------------------------------------------------------------------------------------------------------------------------------------------------------------------------------------------------------------------------------------------------------------------------------------------------------------------------------------------------------------------------------------------------------------------------------------------------------------------------------------------------------------------------------------------------------------------------------------------------------------------------------------------------------------------------------------------------------------------------------------------------------------------------------------------------------------------------------------------------------------------|-------------------------------------------------------------------------------------------------------|-------------------------|-------------------------------|
| HERPUD1 | <p>homocysteine-inducible, endoplasmic reticulum stress-inducible, ubiquitin-like domain member 1 isoform 3<br/> gene:ENSG00000051108 /// Isoform 1 of Homocysteine-responsive endoplasmic reticulum-resident ubiquitin-like domain member 1 protein (Fragment)<br/> gene:ENSG00000051108 /// Isoform 3 of Homocysteine-responsive endoplasmic reticulum-resident ubiquitin-like domain member 1 protein (Fragment)<br/> gene:ENSG00000051108 /// Homo sapiens homocysteine-inducible, endoplasmic reticulum stress-inducible, ubiquitin-like domain member 1, mRNA (cDNA clone MGC:15680 IMAGE:3350209), complete cds. /// Homo sapiens homocysteine-inducible, endoplasmic reticulum stress-inducible, ubiquitin-like domain member 1 (HERPUD1), transcript variant 1, mRNA. /// Homo sapiens homocysteine-inducible, endoplasmic reticulum stress-inducible, ubiquitin-like domain member 1 (HERPUD1), transcript variant 2, mRNA. /// Homo sapiens homocysteine-inducible, endoplasmic reticulum stress-inducible, ubiquitin-like domain member 1 (HERPUD1), transcript variant 3, mRNA.</p> | <p>homocysteine-inducible, endoplasmic reticulum stress-inducible, ubiquitin-like domain member 1</p> | <p>0.002273<br/>983</p> | <p>-<br/>1.179925<br/>913</p> |
| IER3IP1 | <p>Homo sapiens PRO2309 mRNA, complete cds.</p>                                                                                                                                                                                                                                                                                                                                                                                                                                                                                                                                                                                                                                                                                                                                                                                                                                                                                                                                                                                                                                                  | <p>immediate early response 3 interacting protein 1</p>                                               | <p>0.416335<br/>366</p> | <p>-<br/>1.125829<br/>568</p> |
| SVIP    | <p>Small VCP/p97-interacting protein<br/> gene:ENSG00000198168 /// Homo sapiens mRNA; cDNA DKFZp313A2432 (from clone DKFZp313A2432). /// Homo sapiens small VCP/p97-interacting protein (SVIP), mRNA.</p>                                                                                                                                                                                                                                                                                                                                                                                                                                                                                                                                                                                                                                                                                                                                                                                                                                                                                        | <p>small VCP/p97-interacting protein</p>                                                              | <p>0.004605<br/>461</p> | <p>1.268457<br/>487</p>       |

|                                |                                                                                                                                                                                                                                                                                                                                                                                                                                                                                                                                                                                                                                                                                                                                                                            |                                                                                           |                          |                                 |
|--------------------------------|----------------------------------------------------------------------------------------------------------------------------------------------------------------------------------------------------------------------------------------------------------------------------------------------------------------------------------------------------------------------------------------------------------------------------------------------------------------------------------------------------------------------------------------------------------------------------------------------------------------------------------------------------------------------------------------------------------------------------------------------------------------------------|-------------------------------------------------------------------------------------------|--------------------------|---------------------------------|
| ERGIC1                         | <p>cdna:known<br/> chromosome:NCBI36:5:172193928:17<br/> 2258194:1 gene:ENSG00000113719<br/> /// 35 kDa protein<br/> gene:ENSG00000113719 /// Isoform<br/> 1 of Endoplasmic reticulum-Golgi<br/> intermediate compartment protein 1<br/> gene:ENSG00000113719 ///<br/> cdna:known<br/> chromosome:NCBI36:5:172194020:17<br/> 2280180:1 gene:ENSG00000113719<br/> /// Isoform 3 of Endoplasmic<br/> reticulum-Golgi intermediate<br/> compartment protein 1<br/> gene:ENSG00000113719 /// Homo<br/> sapiens endoplasmic reticulum-golgi<br/> intermediate compartment (ERGIC) 1,<br/> mRNA (cDNA clone MGC:16233<br/> IMAGE:3677787), complete cds. ///<br/> Homo sapiens endoplasmic<br/> reticulum-golgi intermediate<br/> compartment (ERGIC) 1 (ERGIC1),<br/> mRNA.</p> | <p>endoplasmic<br/> reticulum-golgi<br/> intermediate<br/> compartment (ERGIC)<br/> 1</p> | <p>0.000491<br/> 703</p> | <p>1.243551<br/> 427</p>        |
| TOR1AIP2                       | <p>Torsin-1A-interacting protein 2<br/> gene:ENSG00000169905 /// IFRG15<br/> protein gene:ENSG00000218839 ///<br/> Homo sapiens cDNA FLJ77012<br/> complete cds, highly similar to Homo<br/> sapiens interferon responsive gene 15<br/> (IFRG15), mRNA. /// Homo sapiens<br/> torsin A interacting protein 2, mRNA<br/> (cDNA clone MGC:126581<br/> IMAGE:8069038), complete cds. ///<br/> Homo sapiens torsin A interacting<br/> protein 2 (TOR1AIP2), mRNA.</p>                                                                                                                                                                                                                                                                                                          | <p>interferon responsive<br/> gene 15 /// torsin A<br/> interacting protein 2</p>         | <p>0.001893<br/> 375</p> | <p>-<br/> 1.192769<br/> 275</p> |
| <b>Functional<br/>Group 10</b> | <b>Transcript Description</b>                                                                                                                                                                                                                                                                                                                                                                                                                                                                                                                                                                                                                                                                                                                                              | <b>Gene Title</b>                                                                         | <b>Bayes.In<br/>p</b>    | <b>Fold</b>                     |

|        |                                                                                                                                                                                                                                                                                                                                                                                                                                                                                                                                                                                                                      |                                                                    |                 |                      |
|--------|----------------------------------------------------------------------------------------------------------------------------------------------------------------------------------------------------------------------------------------------------------------------------------------------------------------------------------------------------------------------------------------------------------------------------------------------------------------------------------------------------------------------------------------------------------------------------------------------------------------------|--------------------------------------------------------------------|-----------------|----------------------|
| EHHADH | Peroxisomal bifunctional enzyme gene:ENSG00000113790 /// Homo sapiens enoyl-Coenzyme A, hydratase/3-hydroxyacyl Coenzyme A dehydrogenase, mRNA (cDNA clone MGC:47770 IMAGE:5533337), complete cds. /// Homo sapiens enoyl-Coenzyme A, hydratase/3-hydroxyacyl Coenzyme A dehydrogenase (EHHADH), mRNA.                                                                                                                                                                                                                                                                                                               | enoyl-Coenzyme A, hydratase/3-hydroxyacyl Coenzyme A dehydrogenase | 0.004094<br>174 | 1.255710<br>944      |
| CROT   | Peroxisomal carnitine O-octanoyltransferase gene:ENSG00000005469 /// Homo sapiens carnitine O-octanoyltransferase, mRNA (cDNA clone MGC:47608 IMAGE:5242962), complete cds. /// Homo sapiens carnitine O-octanoyltransferase (CROT), mRNA.                                                                                                                                                                                                                                                                                                                                                                           | carnitine O-octanoyltransferase                                    | 0.000849<br>813 | -<br>1.246471<br>675 |
| PECR   | Peroxisomal trans-2-enoyl-CoA reductase gene:ENSG00000115425 /// Homo sapiens peroxisomal trans 2-enoyl CoA reductase mRNA, complete cds. /// Homo sapiens peroxisomal trans-2-enoyl-CoA reductase (PECR), mRNA.                                                                                                                                                                                                                                                                                                                                                                                                     | peroxisomal trans-2-enoyl-CoA reductase                            | 0.000520<br>923 | 1.345997<br>976      |
| PECI   | Peroxisomal 3,2-trans-enoyl-CoA isomerase gene:ENSG00000198721 /// Peroxisomal D3,D2-enoyl-CoA isomerase gene:ENSG00000198721 /// Peroxisomal 3,2-trans-enoyl-CoA isomerase gene:ENSG00000198721 /// Peroxisomal D3,D2-enoyl-CoA isomerase gene:ENSG00000198721 /// Peroxisomal 3,2-trans-enoyl-CoA isomerase gene:ENSG00000198721 /// Homo sapiens hepatocellular carcinoma-associated antigen 64 (HCA64) mRNA, complete cds. /// Homo sapiens peroxisomal D3,D2-enoyl-CoA isomerase (PECI), transcript variant 1, mRNA. /// Homo sapiens peroxisomal D3,D2-enoyl-CoA isomerase (PECI), transcript variant 2, mRNA. | peroxisomal D3,D2-enoyl-CoA isomerase                              | 0.000130<br>711 | 1.254021<br>976      |

|                           |                                                                                                                                                                                                                                                                                                                                                                                                                                                                                                                                                                                                                                                                                                                                                                                                                                                         |                                                                              |                   |                 |
|---------------------------|---------------------------------------------------------------------------------------------------------------------------------------------------------------------------------------------------------------------------------------------------------------------------------------------------------------------------------------------------------------------------------------------------------------------------------------------------------------------------------------------------------------------------------------------------------------------------------------------------------------------------------------------------------------------------------------------------------------------------------------------------------------------------------------------------------------------------------------------------------|------------------------------------------------------------------------------|-------------------|-----------------|
| DCI                       | Isoform 1 of 3,2-trans-enoyl-CoA isomerase, mitochondrial<br>gene:ENSG00000167969 /// Homo sapiens cDNA FLJ76046 complete cds, highly similar to Homo sapiens dodecenoyl-Coenzyme A delta isomerase (3,2trans-enoyl-Coenzyme A isomerase) (DCI), mRNA. /// Homo sapiens dodecenoyl-Coenzyme A delta isomerase (3,2 trans-enoyl-Coenzyme A isomerase) (DCI), nuclear gene encoding mitochondrial protein, mRNA.                                                                                                                                                                                                                                                                                                                                                                                                                                          | dodecenoyl-Coenzyme A delta isomerase (3,2 trans-enoyl-Coenzyme A isomerase) | 0.003412<br>221   | 1.180928<br>766 |
| <b>Functional Group 9</b> | <b>Transcript Description</b>                                                                                                                                                                                                                                                                                                                                                                                                                                                                                                                                                                                                                                                                                                                                                                                                                           | <b>Gene Title</b>                                                            | <b>Bayes.In p</b> | <b>Fold</b>     |
| ODF2                      | Outer dense fiber of sperm tails 2<br>gene:ENSG00000136811 /// Isoform 3 of Outer dense fiber protein 2<br>gene:ENSG00000136811 /// Isoform 4 of Outer dense fiber protein 2<br>gene:ENSG00000136811 /// Isoform 5 of Outer dense fiber protein 2<br>gene:ENSG00000136811 /// Isoform 3 of Outer dense fiber protein 2<br>gene:ENSG00000136811 /// Isoform 5 of Outer dense fiber protein 2<br>gene:ENSG00000136811 /// Isoform 1 of Outer dense fiber protein 2<br>gene:ENSG00000136811 /// Outer dense fiber of sperm tails 2<br>gene:ENSG00000136811 /// Homo sapiens outer dense fiber of sperm tails 2, mRNA (cDNA clone MGC:111096 IMAGE:30378678), complete cds. /// Homo sapiens outer dense fiber of sperm tails 2 (ODF2), transcript variant 2, mRNA. /// Homo sapiens outer dense fiber of sperm tails 2 (ODF2), transcript variant 1, mRNA. | outer dense fiber of sperm tails 2                                           | 0.000974<br>165   | 1.240670<br>374 |



|       |                                                                                                                                                                                                                                                                                                                                                                                                                        |                                        |             |              |
|-------|------------------------------------------------------------------------------------------------------------------------------------------------------------------------------------------------------------------------------------------------------------------------------------------------------------------------------------------------------------------------------------------------------------------------|----------------------------------------|-------------|--------------|
| CP110 | Isoform 2 of Centrosomal protein of 110 kDa gene:ENSG00000103540 /// Isoform 1 of Centrosomal protein of 110 kDa gene:ENSG00000103540 /// Isoform 1 of Centrosomal protein of 110 kDa gene:ENSG00000103540 /// Isoform 2 of Centrosomal protein of 110 kDa gene:ENSG00000103540 /// Homo sapiens CP110 protein, mRNA (cDNA clone MGC:33038 IMAGE:5267904), complete cds. /// Homo sapiens CP110 protein (CP110), mRNA. | CP110 protein                          | 6.48832E-05 | -1.31833147  |
| CEP76 | Centrosomal protein of 76 kDa gene:ENSG00000101624 /// Homo sapiens centrosomal protein 76kDa, mRNA (cDNA clone MGC:26034 IMAGE:4792211), complete cds. /// Homo sapiens centrosomal protein 76kDa (CEP76), mRNA.                                                                                                                                                                                                      | centrosomal protein 76kDa              | 0.003484797 | -1.219588703 |
| SSNA1 | Sjogren syndrome nuclear autoantigen 1 gene:ENSG00000176101 /// Homo sapiens Sjogren syndrome nuclear autoantigen 1, mRNA (cDNA clone MGC:5078 IMAGE:3459939), complete cds. /// Homo sapiens Sjogren syndrome nuclear autoantigen 1 (SSNA1), mRNA.                                                                                                                                                                    | Sjogren syndrome nuclear autoantigen 1 | 0.000344734 | 1.25758904   |

|        |                                                                                                                                                                                                                                                                                                                                                                                                                                                                                                                                                                                                                                                                                                                                                                                                                                                                                                                      |                               |                 |                 |
|--------|----------------------------------------------------------------------------------------------------------------------------------------------------------------------------------------------------------------------------------------------------------------------------------------------------------------------------------------------------------------------------------------------------------------------------------------------------------------------------------------------------------------------------------------------------------------------------------------------------------------------------------------------------------------------------------------------------------------------------------------------------------------------------------------------------------------------------------------------------------------------------------------------------------------------|-------------------------------|-----------------|-----------------|
| CEP110 | <p>Centrosomal protein 110kDa<br/> gene:ENSG00000119397 /// Isoform<br/> 1 of Centriolin<br/> gene:ENSG00000119397 ///<br/> Centrosomal protein 110kDa<br/> gene:ENSG00000119397 ///<br/> Centrosomal protein 110kDa<br/> gene:ENSG00000119397 /// Isoform<br/> 1 of Centriolin<br/> gene:ENSG00000119397 ///<br/> Centrosomal protein 110kDa<br/> gene:ENSG00000119397 /// Putative<br/> uncharacterized protein CEP110<br/> gene:ENSG00000119397 /// Isoform<br/> 2 of Centriolin<br/> gene:ENSG00000119397 ///<br/> Centrosomal protein 110kDa<br/> gene:ENSG00000119397 ///<br/> Centrosomal protein 110kDa<br/> gene:ENSG00000119397 /// Putative<br/> uncharacterized protein CEP110<br/> gene:ENSG00000119397 /// Homo<br/> sapiens centrosomal protein 110kDa,<br/> mRNA (cDNA clone MGC:168904<br/> IMAGE:9021281), complete cds. ///<br/> Homo sapiens centrosomal protein<br/> 110kDa (CEP110), mRNA.</p> | centrosomal protein<br>110kDa | 0.007654<br>753 | 1.260544<br>664 |
|--------|----------------------------------------------------------------------------------------------------------------------------------------------------------------------------------------------------------------------------------------------------------------------------------------------------------------------------------------------------------------------------------------------------------------------------------------------------------------------------------------------------------------------------------------------------------------------------------------------------------------------------------------------------------------------------------------------------------------------------------------------------------------------------------------------------------------------------------------------------------------------------------------------------------------------|-------------------------------|-----------------|-----------------|

|                            |                                                                                                                                                                                                                                                                                                                                                                                                                                                                                                                                                                                                                                                                                                                                                                                    |                                                         |                   |              |
|----------------------------|------------------------------------------------------------------------------------------------------------------------------------------------------------------------------------------------------------------------------------------------------------------------------------------------------------------------------------------------------------------------------------------------------------------------------------------------------------------------------------------------------------------------------------------------------------------------------------------------------------------------------------------------------------------------------------------------------------------------------------------------------------------------------------|---------------------------------------------------------|-------------------|--------------|
| BLOC1S2                    | Isoform 2 of Biogenesis of lysosome-related organelles complex 1 subunit 2 gene:ENSG00000196072 ///<br>Isoform 1 of Biogenesis of lysosome-related organelles complex 1 subunit 2 gene:ENSG00000196072 ///<br>Isoform 2 of Biogenesis of lysosome-related organelles complex 1 subunit 2 gene:ENSG00000196072 ///<br>Isoform 2 of Biogenesis of lysosome-related organelles complex 1 subunit 2 gene:ENSG00000196072 /// Homo sapiens cDNA FLJ54853 complete cds, highly similar to Biogenesis of lysosome-related organelles complex-1 subunit 2. /// Homo sapiens biogenesis of lysosomal organelles complex-1, subunit 2 (BLOC1S2), transcript variant 2, mRNA. /// Homo sapiens biogenesis of lysosomal organelles complex-1, subunit 2 (BLOC1S2), transcript variant 1, mRNA. | biogenesis of lysosomal organelles complex-1, subunit 2 | 0.000693186       | -1.182610553 |
| <b>Functional Group 11</b> | <b>Transcript Description</b>                                                                                                                                                                                                                                                                                                                                                                                                                                                                                                                                                                                                                                                                                                                                                      | <b>Gene Title</b>                                       | <b>Bayes.In p</b> | <b>Fold</b>  |
| SYNGR2                     | Synaptogyrin-2 gene:ENSG00000108639 /// Homo sapiens synaptogyrin 2, mRNA (cDNA clone MGC:8571 IMAGE:2823026), complete cds. /// Homo sapiens synaptogyrin 2 (SYNGR2), mRNA.                                                                                                                                                                                                                                                                                                                                                                                                                                                                                                                                                                                                       | synaptogyrin 2                                          | 0.008631148       | 1.17397342   |
| IGF2R                      | 274 kDa protein gene:ENSG00000197081 /// Cation-independent mannose-6-phosphate receptor gene:ENSG00000197081 /// Human cation-independent mannose 6-phosphate receptor mRNA, complete cds. /// Homo sapiens insulin-like growth factor 2 receptor (IGF2R), mRNA.                                                                                                                                                                                                                                                                                                                                                                                                                                                                                                                  | insulin-like growth factor 2 receptor                   | 0.006758776       | -1.165231099 |

|        |                                                                                                                                                                                                                                                                                                                                                                                                                                                                                                                                                     |                                                                                           |                 |                      |
|--------|-----------------------------------------------------------------------------------------------------------------------------------------------------------------------------------------------------------------------------------------------------------------------------------------------------------------------------------------------------------------------------------------------------------------------------------------------------------------------------------------------------------------------------------------------------|-------------------------------------------------------------------------------------------|-----------------|----------------------|
| CD99   | Isoform I of CD99 antigen<br>gene:ENSG00000002586 /// Putative uncharacterized protein CD99<br>gene:ENSG00000002586 /// CD99 antigen isoform b precursor<br>gene:ENSG00000002586 /// Putative uncharacterized protein CD99<br>gene:ENSG00000002586 /// Putative uncharacterized protein CD99<br>gene:ENSG00000002586 /// Homo sapiens CD99 molecule, mRNA (cDNA clone MGC:19734 IMAGE:3606974), complete cds. /// Homo sapiens CD99 molecule (CD99), transcript variant 1, mRNA. /// Homo sapiens CD99 molecule (CD99), transcript variant 2, mRNA. | CD99 molecule                                                                             | 0.004074<br>288 | 1.190899<br>882      |
| GPRC5A | Retinoic acid-induced protein 3<br>gene:ENSG00000013588 /// Homo sapiens cDNA FLJ16117 fis, clone ASTRO2003632, highly similar to Retinoic acid-induced protein 3 (G-proteincoupled receptor family C group 5 member A). /// Homo sapiens G protein-coupled receptor, family C, group 5, member A (GPRC5A), mRNA.                                                                                                                                                                                                                                   | G protein-coupled receptor, family C, group 5, member A                                   | 4.48256E<br>-06 | -<br>1.572536<br>281 |
| LAPTM5 | Lysosomal-associated transmembrane protein 5<br>gene:ENSG00000162511 /// Homo sapiens cDNA FLJ61683 complete cds, moderately similar to Lysosomal-associated multitransmembrane protein. /// Human lysosomal-associated multitransmembrane protein (LAPTM5) mRNA, complete cds. /// Homo sapiens lysosomal multispinning membrane protein 5 (LAPTM5), mRNA.                                                                                                                                                                                         | actin filament associated protein 1-like 1 /// lysosomal multispinning membrane protein 5 | 0.000670<br>384 | -<br>1.424435<br>353 |

|        |                                                                                                                                                                                                                                                                                                                                                                                                                                                                                                                                      |                                                            |                 |                      |
|--------|--------------------------------------------------------------------------------------------------------------------------------------------------------------------------------------------------------------------------------------------------------------------------------------------------------------------------------------------------------------------------------------------------------------------------------------------------------------------------------------------------------------------------------------|------------------------------------------------------------|-----------------|----------------------|
| LETM1  | LETM1 and EF-hand domain-containing protein 1, mitochondrial gene:ENSG00000168924 /// Homo sapiens leucine zipper-EF-hand containing transmembrane protein 1 (LETM1) mRNA, complete cds. /// Homo sapiens leucine zipper-EF-hand containing transmembrane protein 1 (LETM1), nuclear gene encoding mitochondrial protein, mRNA.                                                                                                                                                                                                      | leucine zipper-EF-hand containing transmembrane protein 1  | 0.001545<br>727 | 1.200565<br>539      |
| M6PR   | Cation-dependent mannose-6-phosphate receptor gene:ENSG0000003056 /// Homo sapiens mannose-6-phosphate receptor (cation dependent), mRNA (cDNA clone MGC:4080 IMAGE:3530887), complete cds. /// Homo sapiens mannose-6-phosphate receptor (cation dependent) (M6PR), mRNA.                                                                                                                                                                                                                                                           | mannose-6-phosphate receptor (cation dependent)            | 0.006495<br>577 | -<br>1.174415<br>302 |
| LANCL1 | LanC-like protein 1 gene:ENSG00000115365 /// Homo sapiens LanC lantibiotic synthetase component C-like 1 (bacterial), mRNA (cDNA clone MGC:26280 IMAGE:4829574), complete cds. /// Homo sapiens LanC lantibiotic synthetase component C-like 1 (bacterial) (LANCL1), transcript variant 3, mRNA. /// Homo sapiens LanC lantibiotic synthetase component C-like 1 (bacterial) (LANCL1), transcript variant 1, mRNA. /// Homo sapiens LanC lantibiotic synthetase component C-like 1 (bacterial) (LANCL1), transcript variant 2, mRNA. | LanC lantibiotic synthetase component C-like 1 (bacterial) | 0.005249<br>954 | 1.171764<br>212      |

|          |                                                                                                                                                                                                                                                                                                                                                                                                                                                                                                                                                                                           |                                                                   |                 |                 |
|----------|-------------------------------------------------------------------------------------------------------------------------------------------------------------------------------------------------------------------------------------------------------------------------------------------------------------------------------------------------------------------------------------------------------------------------------------------------------------------------------------------------------------------------------------------------------------------------------------------|-------------------------------------------------------------------|-----------------|-----------------|
| C17orf61 | UPF0451 protein C17orf61<br>gene:ENSG00000205544 /// Homo sapiens cDNA FLJ31260 fis, clone KIDNE2005854, highly similar to Phospholipid scramblase 3. /// Homo sapiens cDNA FLJ77856 complete cds, highly similar to Homo sapiens phospholipid scramblase 3 (PLSCR3), mRNA. /// Homo sapiens chromosome 17 open reading frame 61, mRNA (cDNA clone MGC:40107 IMAGE:5418259), complete cds.                                                                                                                                                                                                | phospholipid scramblase 3 /// chromosome 17 open reading frame 61 | 0.001099<br>691 | 1.276122<br>626 |
| CCDC56   | Coiled-coil domain-containing protein 56 gene:ENSG00000183978 /// Homo sapiens mRNA for HSPC009 variant, clone: PNC06538. /// Homo sapiens coiled-coil domain containing 56 (CCDC56), mRNA.                                                                                                                                                                                                                                                                                                                                                                                               | coiled-coil domain containing 56                                  | 0.003281<br>488 | 1.232223<br>987 |
| SMCR7L   | Putative uncharacterized protein DKFZp434F0116<br>gene:ENSG00000100335 /// Smith-Magenis syndrome chromosome region candidate gene 7 protein-like<br>gene:ENSG00000100335 /// Putative uncharacterized protein DKFZp434F0116<br>gene:ENSG00000100335 /// Smith-Magenis syndrome chromosome region candidate gene 7 protein-like<br>gene:ENSG00000100335 /// Homo sapiens Smith-Magenis syndrome chromosome region, candidate 7-like, mRNA (cDNA clone MGC:15774 IMAGE:3502711), complete cds. /// Homo sapiens Smith-Magenis syndrome chromosome region, candidate 7-like (SMCR7L), mRNA. | Smith-Magenis syndrome chromosome region, candidate 7-like        | 0.003381<br>395 | 1.214924<br>348 |

|                            |                                                                                                                                                                                                                                                                                                                                                                                                                                                                                                     |                                                      |                   |             |
|----------------------------|-----------------------------------------------------------------------------------------------------------------------------------------------------------------------------------------------------------------------------------------------------------------------------------------------------------------------------------------------------------------------------------------------------------------------------------------------------------------------------------------------------|------------------------------------------------------|-------------------|-------------|
| PSMG1                      | Isoform 1 of Proteasome assembly chaperone 1 gene:ENSG00000183527<br>/// Isoform 2 of Proteasome assembly chaperone 1 gene:ENSG00000183527<br>/// Homo sapiens proteasome (prosome, macropain) assembly chaperone 1, mRNA (cDNA clone MGC:15154 IMAGE:3343732), complete cds. /// Homo sapiens proteasome (prosome, macropain) assembly chaperone 1 (PSMG1), transcript variant 1, mRNA. /// Homo sapiens proteasome (prosome, macropain) assembly chaperone 1 (PSMG1), transcript variant 2, mRNA. | proteasome (prosome, macropain) assembly chaperone 1 | 0.005576          | 1.172940102 |
| <b>Functional Group 12</b> | <b>Transcript Description</b>                                                                                                                                                                                                                                                                                                                                                                                                                                                                       | <b>Gene Title</b>                                    | <b>Bayes.In p</b> | <b>Fold</b> |
| MRPS25                     | 28S ribosomal protein S25, mitochondrial<br>gene:ENSG00000131368 /// Homo sapiens mitochondrial ribosomal protein S25, mRNA (cDNA clone MGC:4330 IMAGE:2820823), complete cds. /// Homo sapiens mitochondrial ribosomal protein S25 (MRPS25), nuclear gene encoding mitochondrial protein, mRNA.                                                                                                                                                                                                    | mitochondrial ribosomal protein S25                  | 0.007258278       | 1.175421702 |
| RPL39L                     | 60S ribosomal protein L39-like<br>gene:ENSG00000163923 /// Homo sapiens ribosomal protein L39-like, mRNA (cDNA clone MGC:20168 IMAGE:4555759), complete cds. /// Homo sapiens ribosomal protein L39-like (RPL39L), mRNA.                                                                                                                                                                                                                                                                            | ribosomal protein L39-like                           | 0.004152236       | 1.255115192 |

|       |                                                                                                                                                                                                                                                                                                                                                                                                                                                                                                                                                                                                                                                                                                                                                                                                                                                                                                                                                                                                                                                                                                                                                |                       |                 |                 |
|-------|------------------------------------------------------------------------------------------------------------------------------------------------------------------------------------------------------------------------------------------------------------------------------------------------------------------------------------------------------------------------------------------------------------------------------------------------------------------------------------------------------------------------------------------------------------------------------------------------------------------------------------------------------------------------------------------------------------------------------------------------------------------------------------------------------------------------------------------------------------------------------------------------------------------------------------------------------------------------------------------------------------------------------------------------------------------------------------------------------------------------------------------------|-----------------------|-----------------|-----------------|
| RPL31 | <p>cdna:known<br/> chromosome:NCBI36:2:100985123:10<br/> 0987498:1 gene:ENSG00000071082<br/> /// 60S ribosomal protein L31<br/> gene:ENSG00000071082 ///</p> <p>cdna:known<br/> chromosome:NCBI36:2:100985177:10<br/> 1002510:1 gene:ENSG00000071082<br/> /// cdna:known<br/> chromosome:NCBI36:2:100985187:10<br/> 0989312:1 gene:ENSG00000071082<br/> /// cdna:known<br/> chromosome:NCBI36:2:100985187:10<br/> 0989313:1 gene:ENSG00000071082<br/> /// cdna:known<br/> chromosome:NCBI36:2:100985187:10<br/> 1001200:1 gene:ENSG00000071082<br/> /// cdna:known<br/> chromosome:NCBI36:2:100985187:10<br/> 1001183:1 gene:ENSG00000071082<br/> /// cdna:known<br/> chromosome:NCBI36:2:100985585:10<br/> 0989261:1 gene:ENSG00000071082<br/> /// Homo sapiens ribosomal protein<br/> L31, mRNA (cDNA clone MGC:88191<br/> IMAGE:4714258), complete cds. ///</p> <p>Homo sapiens ribosomal protein L31<br/> (RPL31), transcript variant 2, mRNA.<br/> /// Homo sapiens ribosomal protein<br/> L31 (RPL31), transcript variant 4,<br/> mRNA. ///</p> <p>Homo sapiens ribosomal<br/> protein L31 (RPL31), transcript variant<br/> 1, mRNA.</p> | ribosomal protein L31 | 0.001704<br>748 | 1.280233<br>424 |
| RPL27 | <p>60S ribosomal protein L27<br/> gene:ENSG00000131469 /// 60S<br/> ribosomal protein L27<br/> gene:ENSG00000131469 /// Homo<br/> sapiens ribosomal protein L27<br/> (RPL27) mRNA, complete cds. ///</p> <p>Homo sapiens ribosomal protein L27<br/> (RPL27), mRNA.</p>                                                                                                                                                                                                                                                                                                                                                                                                                                                                                                                                                                                                                                                                                                                                                                                                                                                                         | ribosomal protein L27 | 0.009406<br>362 | 1.217826<br>077 |



|        |                                                                                                                                                                                                                                                                                                                                                                                                                                                                                                                                                                                                                                                                                                                                                                                 |                                        |                 |                 |
|--------|---------------------------------------------------------------------------------------------------------------------------------------------------------------------------------------------------------------------------------------------------------------------------------------------------------------------------------------------------------------------------------------------------------------------------------------------------------------------------------------------------------------------------------------------------------------------------------------------------------------------------------------------------------------------------------------------------------------------------------------------------------------------------------|----------------------------------------|-----------------|-----------------|
| RPL13  | 60S ribosomal protein L13<br>gene:ENSG00000167526 /// 60S<br>ribosomal protein L13<br>gene:ENSG00000167526 /// Homo<br>sapiens cDNA FLJ45674 fis, clone<br>D9OST2004417, highly similar to 60S<br>ribosomal protein L13. /// Homo<br>sapiens ribosomal protein L13<br>(RPL13), transcript variant 2, mRNA.<br>/// Homo sapiens ribosomal protein<br>L13 (RPL13), transcript variant 1,<br>mRNA.                                                                                                                                                                                                                                                                                                                                                                                 | ribosomal protein L13                  | 0.041636<br>024 | 1.129877<br>612 |
| MRPL23 | Putative uncharacterized protein<br>MRPL23 gene:ENSG00000214026 ///<br>Putative uncharacterized protein<br>MRPL23 (Fragment)<br>gene:ENSG00000214026 /// 39S<br>ribosomal protein L23, mitochondrial<br>gene:ENSG00000214026 /// Putative<br>uncharacterized protein MRPL23<br>gene:ENSG00000214026 /// Putative<br>uncharacterized protein MRPL23<br>gene:ENSG00000214026 /// Putative<br>uncharacterized protein MRPL23<br>gene:ENSG00000214026 /// 39S<br>ribosomal protein L23, mitochondrial<br>gene:ENSG00000214026 /// Homo<br>sapiens mitochondrial ribosomal<br>protein L23, mRNA (cDNA clone<br>MGC:12795 IMAGE:4298000),<br>complete cds. /// Homo sapiens<br>mitochondrial ribosomal protein L23<br>(MRPL23), nuclear gene encoding<br>mitochondrial protein, mRNA. | mitochondrial<br>ribosomal protein L23 | 0.001049<br>646 | 1.230894<br>556 |

|        |                                                                                                                                                                                                                                                                                                                                                                                                                                                                                                                                      |                                     |             |             |
|--------|--------------------------------------------------------------------------------------------------------------------------------------------------------------------------------------------------------------------------------------------------------------------------------------------------------------------------------------------------------------------------------------------------------------------------------------------------------------------------------------------------------------------------------------|-------------------------------------|-------------|-------------|
| MRPL24 | 39S ribosomal protein L24, mitochondrial<br>gene:ENSG00000143314 /// 39S ribosomal protein L24, mitochondrial<br>gene:ENSG00000143314 /// Homo sapiens mitochondrial ribosomal protein L24, mRNA (cDNA clone MGC:22737 IMAGE:4108596), complete cds. /// Homo sapiens mitochondrial ribosomal protein L24 (MRPL24), nuclear gene encoding mitochondrial protein, transcript variant 1, mRNA. /// Homo sapiens mitochondrial ribosomal protein L24 (MRPL24), nuclear gene encoding mitochondrial protein, transcript variant 2, mRNA. | mitochondrial ribosomal protein L24 | 3.21024E-05 | 1.308731098 |
| JTV1   | Multisynthetase complex auxiliary component p38<br>gene:ENSG00000106305 /// Putative uncharacterized protein ENSP00000383327<br>gene:ENSG00000106305 /// 28 kDa protein gene:ENSG00000106305 /// Homo sapiens JTV1 gene, mRNA (cDNA clone MGC:17435 IMAGE:3446074), complete cds. /// Homo sapiens JTV1 gene (JTV1), mRNA.                                                                                                                                                                                                           | JTV1 gene                           | 0.000115209 | 1.285672543 |

|        |                                                                                                                                                                                                                                                                                                                                                                                                                                                                                                                                                                                                                                                                                                                                                                                                                                                          |                                                   |             |              |
|--------|----------------------------------------------------------------------------------------------------------------------------------------------------------------------------------------------------------------------------------------------------------------------------------------------------------------------------------------------------------------------------------------------------------------------------------------------------------------------------------------------------------------------------------------------------------------------------------------------------------------------------------------------------------------------------------------------------------------------------------------------------------------------------------------------------------------------------------------------------------|---------------------------------------------------|-------------|--------------|
| MTRF1L | <p>Isoform 4 of Peptide chain release factor 1-like, mitochondrial<br/> gene:ENSG00000112031 /// Isoform 1 of Peptide chain release factor 1-like, mitochondrial<br/> gene:ENSG00000112031 /// Isoform 2 of Peptide chain release factor 1-like, mitochondrial<br/> gene:ENSG00000112031 ///<br/> cdna:known<br/> chromosome:NCBI36:4:189896500:189897680:1 gene:ENSG00000180015<br/> /// Homo sapiens cDNA FLJ76265 complete cds, highly similar to Homo sapiens mitochondrial translational release factor 1-like (MTRF1L), mRNA.<br/> /// Homo sapiens mitochondrial translational release factor 1-like (MTRF1L), nuclear gene encoding mitochondrial protein, transcript variant 1, mRNA. /// Homo sapiens mitochondrial translational release factor 1-like (MTRF1L), nuclear gene encoding mitochondrial protein, transcript variant 2, mRNA.</p> | mitochondrial translational release factor 1-like | 0.006968843 | -1.159501335 |
| MRPS26 | <p>28S ribosomal protein S26, mitochondrial<br/> gene:ENSG00000125901 /// Homo sapiens mitochondrial ribosomal protein S26, mRNA (cDNA clone MGC:4583 IMAGE:3051126), complete cds. /// Homo sapiens mitochondrial ribosomal protein S26 (MRPS26), nuclear gene encoding mitochondrial protein, mRNA.</p>                                                                                                                                                                                                                                                                                                                                                                                                                                                                                                                                                | mitochondrial ribosomal protein S26               | 0.003409606 | 1.169242609  |

|           |                                                                                                                                                                                                                                                                                                                                                                                                                |                                                         |             |              |
|-----------|----------------------------------------------------------------------------------------------------------------------------------------------------------------------------------------------------------------------------------------------------------------------------------------------------------------------------------------------------------------------------------------------------------------|---------------------------------------------------------|-------------|--------------|
| QRSL1     | Isoform 1 of Glutamyl-tRNA(Gln) amidotransferase subunit A homolog gene:ENSG00000130348 /// Isoform 2 of Glutamyl-tRNA(Gln) amidotransferase subunit A homolog gene:ENSG00000130348 /// Homo sapiens glutaminyl-tRNA synthase (glutamine-hydrolyzing)-like 1, mRNA (cDNA clone MGC:12589 IMAGE:3605968), complete cds. /// Homo sapiens glutaminyl-tRNA synthase (glutamine-hydrolyzing)-like 1 (QRSL1), mRNA. | glutaminyl-tRNA synthase (glutamine-hydrolyzing)-like 1 | 0.002795037 | 1.188231082  |
| RPS27L    | 40S ribosomal protein S27-like protein gene:ENSG00000185088 /// 13 kDa protein gene:ENSG00000185088 /// Homo sapiens ribosomal protein S27-like, mRNA (cDNA clone MGC:12175 IMAGE:3827362), complete cds. /// Homo sapiens ribosomal protein S27-like (RPS27L), mRNA.                                                                                                                                          | ribosomal protein S27-like                              | 0.001063446 | -1.254328897 |
| MRPL16    | 39S ribosomal protein L16, mitochondrial gene:ENSG00000166902 /// Homo sapiens 28.4 kDa protein mRNA, complete cds. /// Homo sapiens mitochondrial ribosomal protein L16 (MRPL16), nuclear gene encoding mitochondrial protein, mRNA.                                                                                                                                                                          | mitochondrial ribosomal protein L16                     | 0.005442128 | 1.169424372  |
| MRPS24    | 28S ribosomal protein S24, mitochondrial gene:ENSG00000062582 /// Putative uncharacterized protein MRPS24 gene:ENSG00000062582 /// Homo sapiens mitochondrial ribosomal protein S24, mRNA (cDNA clone MGC:20409 IMAGE:4637888), complete cds. /// Homo sapiens mitochondrial ribosomal protein S24 (MRPS24), nuclear gene encoding mitochondrial protein, mRNA.                                                | mitochondrial ribosomal protein S24                     | 0.004980842 | 1.177301531  |
| LOC642892 | PREDICTED: Homo sapiens similar to mCG7602 (LOC642892), mRNA.                                                                                                                                                                                                                                                                                                                                                  | similar to mCG7602                                      | 8.7572E-05  | 1.332199568  |

| Functional Group 13 | Transcript Description                                                                                                                                                                                                                                                                                                                                                                                                          | Gene Title                                       | Bayes.In p  | Fold         |
|---------------------|---------------------------------------------------------------------------------------------------------------------------------------------------------------------------------------------------------------------------------------------------------------------------------------------------------------------------------------------------------------------------------------------------------------------------------|--------------------------------------------------|-------------|--------------|
| SRI                 | Sorcin gene:ENSG00000075142 /// sorcin isoform b gene:ENSG00000075142 /// Human sorcin (SRI) mRNA, complete cds. /// Homo sapiens sorcin (SRI), transcript variant 1, mRNA. /// Homo sapiens sorcin (SRI), transcript variant 2, mRNA.                                                                                                                                                                                          | sorcin                                           | 9.72486E-05 | 1.335394273  |
| GCA                 | Grancalcin gene:ENSG00000115271 /// Homo sapiens grancalcin, EF-hand calcium binding protein, mRNA (cDNA clone MGC:12231 IMAGE:3996889), complete cds. /// Homo sapiens grancalcin, EF-hand calcium binding protein (GCA), mRNA.                                                                                                                                                                                                | grancalcin, EF-hand calcium binding protein      | 2.17768E-05 | 1.376423224  |
| MYL4                | Myosin light chain 4 gene:ENSG00000198336 /// Myosin light chain 4 gene:ENSG00000198336 /// Homo sapiens myosin, light chain 4, alkali; atrial, embryonic, mRNA (cDNA clone MGC:34523 IMAGE:5226518), complete cds. /// Homo sapiens myosin, light chain 4, alkali; atrial, embryonic (MYL4), transcript variant 1, mRNA. /// Homo sapiens myosin, light chain 4, alkali; atrial, embryonic (MYL4), transcript variant 2, mRNA. | myosin, light chain 4, alkali; atrial, embryonic | 0.001866021 | 1.54330964   |
| CALB1               | Calbindin gene:ENSG00000104327 /// Homo sapiens calbindin 1, 28kDa, mRNA (cDNA clone MGC:24064 IMAGE:4592497), complete cds. /// Homo sapiens calbindin 1, 28kDa (CALB1), mRNA.                                                                                                                                                                                                                                                 | calbindin 1, 28kDa                               | 2.05582E-08 | -1.527780087 |

|                                |                                                                                                                                                                                                                                                                                                                                                                                                                                                                                                                                                                                                                                                                                                                                                                                                                                                                                                                                                                                                        |                                             |                       |                      |
|--------------------------------|--------------------------------------------------------------------------------------------------------------------------------------------------------------------------------------------------------------------------------------------------------------------------------------------------------------------------------------------------------------------------------------------------------------------------------------------------------------------------------------------------------------------------------------------------------------------------------------------------------------------------------------------------------------------------------------------------------------------------------------------------------------------------------------------------------------------------------------------------------------------------------------------------------------------------------------------------------------------------------------------------------|---------------------------------------------|-----------------------|----------------------|
| MCFD2                          | <p>cdna:known<br/> chromosome:NCBI36:2:46982517:469<br/> 96697:-1 gene:ENSG00000180398 ///</p> <p>cdna:known<br/> chromosome:NCBI36:2:46982517:469<br/> 96459:-1 gene:ENSG00000180398 ///</p> <p>cdna:known<br/> chromosome:NCBI36:2:46982517:469<br/> 96423:-1 gene:ENSG00000180398 ///</p> <p>Multiple coagulation factor deficiency<br/> protein 2 gene:ENSG00000180398 ///</p> <p>cdna:known<br/> chromosome:NCBI36:2:46985601:470<br/> 22375:-1 gene:ENSG00000180398 ///</p> <p>cdna:known<br/> chromosome:NCBI36:2:46985914:469<br/> 96453:-1 gene:ENSG00000180398 ///</p> <p>cdna:known<br/> chromosome:NCBI36:2:46986011:470<br/> 22498:-1 gene:ENSG00000180398 ///</p> <p>cdna:known<br/> chromosome:NCBI36:2:46986037:469<br/> 96755:-1 gene:ENSG00000180398 ///</p> <p>Homo sapiens multiple coagulation<br/> factor deficiency 2, mRNA (cDNA<br/> clone MGC:9537 IMAGE:3925166),<br/> complete cds. /// Homo sapiens<br/> multiple coagulation factor deficiency<br/> 2 (MCFD2), mRNA.</p> | multiple coagulation<br>factor deficiency 2 | 0.001766<br>448       | 1.189254<br>788      |
| FKBP14                         | <p>FK506-binding protein 14<br/> gene:ENSG00000106080 /// Homo<br/> sapiens clone DNA44194 FKBP14<br/> (UNQ322) mRNA, complete cds. ///</p> <p>Homo sapiens FK506 binding protein<br/> 14, 22 kDa (FKBP14), mRNA.</p>                                                                                                                                                                                                                                                                                                                                                                                                                                                                                                                                                                                                                                                                                                                                                                                  | FK506 binding protein<br>14, 22 kDa         | 0.000327<br>717       | -<br>1.275949<br>087 |
| <b>Functional<br/>Group 14</b> | <b>Transcript Description</b>                                                                                                                                                                                                                                                                                                                                                                                                                                                                                                                                                                                                                                                                                                                                                                                                                                                                                                                                                                          | <b>Gene Title</b>                           | <b>Bayes.In<br/>p</b> | <b>Fold</b>          |
| GAS2L3                         | <p>GAS2-like protein 3<br/> gene:ENSG00000139354 /// Homo<br/> sapiens growth arrest-specific 2 like 3,<br/> mRNA (cDNA clone MGC:50047<br/> IMAGE:5104644), complete cds. ///</p> <p>Homo sapiens growth arrest-specific<br/> 2 like 3 (GAS2L3), mRNA.</p>                                                                                                                                                                                                                                                                                                                                                                                                                                                                                                                                                                                                                                                                                                                                            | growth arrest-specific<br>2 like 3          | 0.000812<br>828       | 1.268223<br>614      |

|          |                                                                                                                                                                                                                                                                                                                                                                                                                                                                                                                                                                                                                                                                                                |                                                           |             |              |
|----------|------------------------------------------------------------------------------------------------------------------------------------------------------------------------------------------------------------------------------------------------------------------------------------------------------------------------------------------------------------------------------------------------------------------------------------------------------------------------------------------------------------------------------------------------------------------------------------------------------------------------------------------------------------------------------------------------|-----------------------------------------------------------|-------------|--------------|
| PPP1R15A | Protein phosphatase 1 regulatory subunit 15A gene:ENSG00000087074 /// Homo sapiens cDNA FLJ51898 complete cds, highly similar to Homo sapiens protein phosphatase 1, regulatory (inhibitor) subunit 15A (PPP1R15A), mRNA. /// Homo sapiens protein phosphatase 1, regulatory (inhibitor) subunit 15A (PPP1R15A), mRNA.                                                                                                                                                                                                                                                                                                                                                                         | protein phosphatase 1, regulatory (inhibitor) subunit 15A | 4.03971E-07 | -1.544822939 |
| BTG3     | Isoform 2 of Protein BTG3 gene:ENSG00000154640 /// Isoform 1 of Protein BTG3 gene:ENSG00000154640 /// Homo sapiens BTG family, member 3, mRNA (cDNA clone MGC:8928 IMAGE:3859781), complete cds. /// Homo sapiens BTG family, member 3 (BTG3), transcript variant 1, mRNA. /// Homo sapiens BTG family, member 3 (BTG3), transcript variant 2, mRNA.                                                                                                                                                                                                                                                                                                                                           | BTG family, member 3                                      | 0.003335818 | -1.190185569 |
| CGREF1   | Putative uncharacterized protein CGREF1 gene:ENSG00000138028 /// Cell growth regulator with EF hand domain protein 1 gene:ENSG00000138028 /// Cell growth regulator with EF hand domain protein 1 gene:ENSG00000138028 /// Homo sapiens cell growth regulator with EF-hand domain 1, mRNA (cDNA clone MGC:34428 IMAGE:5182241), complete cds. /// Homo sapiens cell growth regulator with EF-hand domain 1 (CGREF1), mRNA. | cell growth regulator with EF-hand domain 1               | 0.000676921 | -1.366963823 |

|                            |                                                                                                                                                                                                                                                                                                                                                              |                                                          |                   |              |
|----------------------------|--------------------------------------------------------------------------------------------------------------------------------------------------------------------------------------------------------------------------------------------------------------------------------------------------------------------------------------------------------------|----------------------------------------------------------|-------------------|--------------|
| RPRM                       | Protein reprimogene:ENSG00000177519 /// Homo sapiens reprimogene, TP53 dependent G2 arrest mediator candidate, mRNA (cDNA clone MGC:11260 IMAGE:3942270), complete cds. /// Homo sapiens reprimogene, TP53 dependent G2 arrest mediator candidate (RPRM), mRNA.                                                                                              | reprimogene, TP53 dependent G2 arrest mediator candidate | 0.005161311       | 1.194146899  |
| DLEU1                      | Leukemia-associated protein 1 gene:ENSG00000176124 /// Homo sapiens mRNA for B-cell neoplasia associated transcript, (BCMS gene), splice variant B, non coding transcript. /// Homo sapiens deleted in lymphocytic leukemia 1 (non-protein coding) (DLEU1), non-coding RNA.                                                                                  | deleted in lymphocytic leukemia 1 (non-protein coding)   | 9.35744E-05       | 1.34718688   |
| MCC                        | 93 kDa protein gene:ENSG00000171444 /// cdna:known chromosome:NCBI36:5:112390898:112852010:-1 gene:ENSG00000171444 /// Homo sapiens mRNA; cDNA DKFZp686B1231 (from clone DKFZp686B1231). /// Homo sapiens mutated in colorectal cancers (MCC), transcript variant 2, mRNA. /// Homo sapiens mutated in colorectal cancers (MCC), transcript variant 1, mRNA. | mutated in colorectal cancers                            | 0.006328817       | -1.237749327 |
| <b>Functional Group 15</b> | <b>Transcript Description</b>                                                                                                                                                                                                                                                                                                                                | <b>Gene Title</b>                                        | <b>Bayes.In p</b> | <b>Fold</b>  |
| GORASP1                    | Isoform 1 of Golgi reassembly-stacking protein 1 gene:ENSG00000114745 /// Homo sapiens cDNA FLJ42765 fis, clone BRAWH3002853, highly similar to Golgi reassembly-stacking protein 1. /// Homo sapiens golgi reassembly stacking protein 1, 65kDa (GORASP1), mRNA.                                                                                            | golgi reassembly stacking protein 1, 65kDa               | 0.009608401       | 1.188583408  |



|          |                                                                                                                                                                                                                                                                                                                                                                                                                 |                                                           |                 |                 |
|----------|-----------------------------------------------------------------------------------------------------------------------------------------------------------------------------------------------------------------------------------------------------------------------------------------------------------------------------------------------------------------------------------------------------------------|-----------------------------------------------------------|-----------------|-----------------|
| STARD3NL | Isoform 1 of MLN64 N-terminal domain homolog<br>gene:ENSG00000010270 /// Isoform 1 of MLN64 N-terminal domain homolog gene:ENSG00000010270 /// Homo sapiens cDNA FLJ34260 fis, clone FEBRA2000782, moderately similar to MLN 64 PROTEIN. /// Homo sapiens STARD3 N-terminal like (STARD3NL), mRNA.                                                                                                              | STARD3 N-terminal like                                    | 0.000773<br>235 | 1.251229<br>806 |
| TMED3    | Transmembrane emp24 domain-containing protein 3<br>gene:ENSG00000166557 /// Homo sapiens cDNA FLJ75946 complete cds, highly similar to Homo sapiens transmembrane emp24 protein transport domain containing 3 (TMED3), mRNA. /// Homo sapiens transmembrane emp24 protein transport domain containing 3 (TMED3), mRNA.                                                                                          | transmembrane emp24 protein transport domain containing 3 | 0.009634<br>817 | 1.172139<br>107 |
| CHMP2A   | Charged multivesicular body protein 2a gene:ENSG00000130724 /// Charged multivesicular body protein 2a gene:ENSG00000130724 /// Homo sapiens chromatin modifying protein 2A, mRNA (cDNA clone MGC:806 IMAGE:3051024), complete cds. /// Homo sapiens chromatin modifying protein 2A (CHMP2A), transcript variant 1, mRNA. /// Homo sapiens chromatin modifying protein 2A (CHMP2A), transcript variant 2, mRNA. | chromatin modifying protein 2A                            | 0.005334<br>726 | 1.168636<br>175 |
| COG6     | cDNA FLJ56431, highly similar to Conserved oligomeric Golgi complex component 6<br>gene:ENSG00000133103 /// Isoform 3 of Conserved oligomeric Golgi complex subunit 6<br>gene:ENSG00000133103 /// Homo sapiens component of oligomeric golgi complex 6, mRNA (cDNA clone MGC:48438 IMAGE:5263056), complete cds. /// Homo sapiens component of oligomeric golgi complex 6 (COG6), mRNA.                         | component of oligomeric golgi complex 6                   | 0.004414<br>472 | 1.187367<br>828 |

|                                |                                                                                                                                                                                                                                                                                                                                                                                                                                                                                                                                                                  |                                                             |                       |                      |
|--------------------------------|------------------------------------------------------------------------------------------------------------------------------------------------------------------------------------------------------------------------------------------------------------------------------------------------------------------------------------------------------------------------------------------------------------------------------------------------------------------------------------------------------------------------------------------------------------------|-------------------------------------------------------------|-----------------------|----------------------|
| TMEM9                          | Transmembrane protein 9<br>gene:ENSG00000116857 ///<br>Transmembrane protein 9<br>gene:ENSG00000116857 /// 16 kDa<br>protein gene:ENSG00000116857 ///<br>Homo sapiens cDNA FLJ34407 fis,<br>clone HEART1000173. /// Homo<br>sapiens transmembrane protein 9<br>(TMEM9), mRNA. | transmembrane<br>protein 9                                  | 0.001251<br>575       | 1.213576<br>556      |
| VPS26A                         | Vacuolar protein sorting-associated<br>protein 26A gene:ENSG00000122958<br>/// Vacuolar protein sorting-<br>associated protein 26A<br>gene:ENSG00000122958 /// vacuolar<br>protein sorting 26 A isoform 2<br>gene:ENSG00000122958 /// Homo<br>sapiens vacuolar sorting protein 26<br>(VPS26) mRNA, complete cds. ///<br>Homo sapiens vacuolar protein<br>sorting 26 homolog A (S. pombe)<br>(VPS26A), transcript variant 1, mRNA.<br>/// Homo sapiens vacuolar protein<br>sorting 26 homolog A (S. pombe)<br>(VPS26A), transcript variant 2, mRNA.               | vacuolar protein<br>sorting 26 homolog A<br>(S. pombe)      | 0.001301<br>43        | 1.200989<br>301      |
| VPS37B                         | Vacuolar protein sorting-associated<br>protein 37B gene:ENSG00000139722<br>/// Homo sapiens vacuolar protein<br>sorting 37 homolog B (S. cerevisiae),<br>mRNA (cDNA clone MGC:4691<br>IMAGE:3533384), complete cds. ///<br>Homo sapiens vacuolar protein<br>sorting 37 homolog B (S. cerevisiae)<br>(VPS37B), mRNA.                                                                                                                                                                                                                                              | vacuolar protein<br>sorting 37 homolog B<br>(S. cerevisiae) | 0.000343<br>893       | -<br>1.298829<br>859 |
| <b>Functional<br/>Group 16</b> | <b>Transcript Description</b>                                                                                                                                                                                                                                                                                                                                                                                                                                                                                                                                    | <b>Gene Title</b>                                           | <b>Bayes.In<br/>p</b> | <b>Fold</b>          |

|                            |                                                                                                                                                                                                                                                                           |                                                                 |                   |                      |
|----------------------------|---------------------------------------------------------------------------------------------------------------------------------------------------------------------------------------------------------------------------------------------------------------------------|-----------------------------------------------------------------|-------------------|----------------------|
| NOG                        | Noggin gene:ENSG00000183691 /// Homo sapiens noggin, mRNA (cDNA clone MGC:23903 IMAGE:4737725), complete cds. /// Homo sapiens noggin (NOG), mRNA.                                                                                                                        | noggin                                                          | 0.003703<br>057   | 1.238350<br>742      |
| BMPER                      | BMP-binding endothelial regulator protein gene:ENSG00000164619 /// Homo sapiens crossveinless-2 mRNA, complete cds. /// Homo sapiens BMP binding endothelial regulator (BMPER), mRNA.                                                                                     | BMP binding endothelial regulator                               | 1.35186E<br>-09   | -<br>2.319014<br>345 |
| CER1                       | Cerberus gene:ENSG00000147869 /// Homo sapiens cerberus 1, cysteine knot superfamily, homolog (Xenopus laevis), mRNA (cDNA clone MGC:119894 IMAGE:40015380), complete cds. /// Homo sapiens cerberus 1, cysteine knot superfamily, homolog (Xenopus laevis) (CER1), mRNA. | cerberus 1, cysteine knot superfamily, homolog (Xenopus laevis) | 5.35057E<br>-08   | 1.474863<br>24       |
| GDF15                      | Growth/differentiation factor 15 gene:ENSG00000130513 /// Homo sapiens macrophage inhibitory cytokine-1 (MIC-1) mRNA, complete cds. /// Homo sapiens growth differentiation factor 15 (GDF15), mRNA.                                                                      | growth differentiation factor 15                                | 2.68327E<br>-08   | -<br>1.724689<br>975 |
| SOSTDC1                    | Sclerostin domain-containing protein 1 gene:ENSG00000171243 /// Homo sapiens sclerostin domain containing 1, mRNA (cDNA clone MGC:14794 IMAGE:4048654), complete cds. /// Homo sapiens sclerostin domain containing 1 (SOSTDC1), mRNA.                                    | sclerostin domain containing 1                                  | 1.57083E<br>-06   | -<br>1.827702<br>092 |
| FRZB                       | Secreted frizzled-related protein 3 gene:ENSG00000162998 /// Human frezzled (fre) mRNA, complete cds. /// Homo sapiens frizzled-related protein (FRZB), mRNA.                                                                                                             | frizzled-related protein                                        | 1.86211E<br>-05   | 1.606325<br>43       |
| <b>Functional Group 17</b> | <b>Transcript Description</b>                                                                                                                                                                                                                                             | <b>Gene Title</b>                                               | <b>Bayes.In p</b> | <b>Fold</b>          |

|        |                                                                                                                                                                                                                                                                                                                                                                                                                                                                  |                                                         |                 |                 |
|--------|------------------------------------------------------------------------------------------------------------------------------------------------------------------------------------------------------------------------------------------------------------------------------------------------------------------------------------------------------------------------------------------------------------------------------------------------------------------|---------------------------------------------------------|-----------------|-----------------|
| CDC27  | Cell division cycle protein 27 homolog gene:ENSG0000004897 /// Homo sapiens cell division cycle 27 homolog (S. cerevisiae), mRNA (cDNA clone MGC:12709 IMAGE:4301175), complete cds. /// Homo sapiens cell division cycle 27 homolog (S. cerevisiae) (CDC27), transcript variant 1, mRNA. /// Homo sapiens cell division cycle 27 homolog (S. cerevisiae) (CDC27), transcript variant 2, mRNA.                                                                   | cell division cycle 27 homolog (S. cerevisiae)          | 0.000880<br>429 | 1.222615<br>67  |
| GPSM2  | LGN protein gene:ENSG00000121957 /// LGN protein gene:ENSG00000121957 /// G-protein-signaling modulator 2 gene:ENSG00000121957 /// Homo sapiens cDNA FLJ56086 complete cds, highly similar to G-protein signaling modulator 2. /// Homo sapiens G-protein signaling modulator 2 (AGS3-like, C. elegans) (GPSM2), mRNA.                                                                                                                                           | G-protein signaling modulator 2 (AGS3-like, C. elegans) | 0.002637<br>988 | 1.226955<br>711 |
| TOMM34 | Mitochondrial import receptor subunit TOM34 gene:ENSG00000025772 /// cDNA FLJ26027 fis, clone PNC04328, highly similar to Homo sapiens translocase of outer mitochondrial membrane 34 gene:ENSG00000025772 /// Homo sapiens translocase of outer mitochondrial membrane 34, mRNA (cDNA clone MGC:3515 IMAGE:2960090), complete cds. /// Homo sapiens translocase of outer mitochondrial membrane 34 (TOMM34), nuclear gene encoding mitochondrial protein, mRNA. | translocase of outer mitochondrial membrane 34          | 0.006754<br>355 | 1.167816<br>537 |
| TTC13  | Isoform 1 of Tetratricopeptide repeat protein 13 gene:ENSG00000143643 /// tetratricopeptide repeat domain 13 isoform b gene:ENSG00000143643 /// Homo sapiens tetratricopeptide repeat domain 13 (TTC13), transcript variant 1, mRNA. /// Homo sapiens tetratricopeptide repeat domain 13 (TTC13), transcript variant 2, mRNA.                                                                                                                                    | tetratricopeptide repeat domain 13                      | 0.005835<br>153 | 1.331225<br>477 |

| Functional Group 18 | Transcript Description                                                                                                                                                                                                                                                                                                                                                                                                                                                                                                                                                                                                                                                                                                                                                                                                                                                                                                                                                                                                                                                                                                                              | Gene Title                                                                                            | Bayes.In p      | Fold            |
|---------------------|-----------------------------------------------------------------------------------------------------------------------------------------------------------------------------------------------------------------------------------------------------------------------------------------------------------------------------------------------------------------------------------------------------------------------------------------------------------------------------------------------------------------------------------------------------------------------------------------------------------------------------------------------------------------------------------------------------------------------------------------------------------------------------------------------------------------------------------------------------------------------------------------------------------------------------------------------------------------------------------------------------------------------------------------------------------------------------------------------------------------------------------------------------|-------------------------------------------------------------------------------------------------------|-----------------|-----------------|
| HSD17B7             | <p>17-beta-hydroxysteroid dehydrogenase type VII isoform<br/> gene:ENSG00000099251 /// Putative uncharacterized protein<br/> ENSP00000277668<br/> gene:ENSG00000099251 /// cDNA FLJ60462, highly similar to 3-keto-steroid reductase<br/> gene:ENSG00000099251 /// 17beta-hydroxysteroid dehydrogenase type 7 form 2<br/> gene:ENSG00000099251 /// Isoform 1 of 3-keto-steroid reductase<br/> gene:ENSG00000132196 /// Hydroxysteroid (17-beta) dehydrogenase 7<br/> gene:ENSG00000132196 /// Isoform 3 of 3-keto-steroid reductase<br/> gene:ENSG00000132196 /// Hydroxysteroid (17-beta) dehydrogenase 7<br/> gene:ENSG00000132196 /// Hydroxysteroid (17-beta) dehydrogenase 7<br/> gene:ENSG00000132196 /// Homo sapiens hydroxysteroid (17-beta) dehydrogenase 7, mRNA (cDNA clone MGC:75018 IMAGE:6062803), complete cds. /// Homo sapiens hydroxysteroid (17-beta) dehydrogenase 7 pseudogene 2, mRNA (cDNA clone MGC:88684 IMAGE:4634372), complete cds. /// Homo sapiens hydroxysteroid (17-beta) dehydrogenase 7 pseudogene 2 (HSD17B7P2), non-coding RNA. /// Homo sapiens hydroxysteroid (17-beta) dehydrogenase 7 (HSD17B7), mRNA.</p> | hydroxysteroid (17-beta) dehydrogenase 7<br>/// hydroxysteroid (17-beta) dehydrogenase 7 pseudogene 2 | 0.009368<br>958 | 1.197695<br>128 |

|                            |                                                                                                                                                                                                                                                                                                                                                                                      |                                          |                   |                      |
|----------------------------|--------------------------------------------------------------------------------------------------------------------------------------------------------------------------------------------------------------------------------------------------------------------------------------------------------------------------------------------------------------------------------------|------------------------------------------|-------------------|----------------------|
| HSD17B8                    | Estradiol 17-beta-dehydrogenase 8<br>gene:ENSG00000206216 /// Estradiol 17-beta-dehydrogenase 8<br>gene:ENSG00000112474 /// Estradiol 17-beta-dehydrogenase 8<br>gene:ENSG00000204228 /// Homo sapiens hydroxysteroid (17-beta) dehydrogenase 8, mRNA (cDNA clone MGC:17181 IMAGE:4213813), complete cds. /// Homo sapiens hydroxysteroid (17-beta) dehydrogenase 8 (HSD17B8), mRNA. | hydroxysteroid (17-beta) dehydrogenase 8 | 0.006804<br>593   | 1.255963<br>668      |
| HSD11B2                    | Corticosteroid 11-beta-dehydrogenase isozyme 2<br>gene:ENSG00000176387 /// Human 11-beta-hydroxysteroid dehydrogenase type 2 mRNA, complete cds. /// Homo sapiens hydroxysteroid (11-beta) dehydrogenase 2 (HSD11B2), mRNA.                                                                                                                                                          | hydroxysteroid (11-beta) dehydrogenase 2 | 0.007978<br>617   | 1.237111<br>113      |
| HSD17B3                    | Testosterone 17-beta-dehydrogenase 3<br>gene:ENSG00000130948 /// Hydroxysteroid (17-beta) dehydrogenase 3<br>gene:ENSG00000130948 /// Human 17beta-hydroxysteroid dehydrogenase type 3 mRNA, complete cds. /// Homo sapiens hydroxysteroid (17-beta) dehydrogenase 3 (HSD17B3), mRNA.                                                                                                | hydroxysteroid (17-beta) dehydrogenase 3 | 0.000628<br>457   | -<br>1.537172<br>857 |
| <b>Functional Group 19</b> | <b>Transcript Description</b>                                                                                                                                                                                                                                                                                                                                                        | <b>Gene Title</b>                        | <b>Bayes.In p</b> | <b>Fold</b>          |
| PTTG1                      | Securin gene:ENSG00000164611 ///<br>Securin gene:ENSG00000164611 ///<br>Homo sapiens pituitary tumor transforming gene protein (PTTG) mRNA, complete cds. /// Homo sapiens pituitary tumor-transforming 1 (PTTG1), mRNA.                                                                                                                                                             | pituitary tumor-transforming 1           | 0.006930<br>506   | 1.144838<br>702      |

|       |                                                                                                                                                                                                                                                                                                                                                                                                                                                                                                                                                                                                                                                                                                                                                                 |                                                        |                 |                 |
|-------|-----------------------------------------------------------------------------------------------------------------------------------------------------------------------------------------------------------------------------------------------------------------------------------------------------------------------------------------------------------------------------------------------------------------------------------------------------------------------------------------------------------------------------------------------------------------------------------------------------------------------------------------------------------------------------------------------------------------------------------------------------------------|--------------------------------------------------------|-----------------|-----------------|
| SGOL1 | Isoform 3 of Shugoshin-like 1<br>gene:ENSG00000129810 /// Isoform 7 of Shugoshin-like 1<br>gene:ENSG00000129810 /// Isoform 1 of Shugoshin-like 1<br>gene:ENSG00000129810 /// Homo sapiens Sgo1 mRNA for shugoshin 1EF protein, complete cds. /// Homo sapiens shugoshin-like 1 (S. pombe) (SGOL1), transcript variant A1, mRNA. /// Homo sapiens shugoshin-like 1 (S. pombe) (SGOL1), transcript variant B1, mRNA. /// Homo sapiens shugoshin-like 1 (S. pombe) (SGOL1), transcript variant C1, mRNA. /// Homo sapiens shugoshin-like 1 (S. pombe) (SGOL1), transcript variant C2, mRNA. /// Homo sapiens shugoshin-like 1 (S. pombe) (SGOL1), transcript variant B2, mRNA. /// Homo sapiens shugoshin-like 1 (S. pombe) (SGOL1), transcript variant A2, mRNA. | shugoshin-like 1 (S. pombe)                            | 0.004828<br>872 | 1.196577<br>077 |
| PIN1  | Peptidyl-prolyl cis-trans isomerase NIMA-interacting 1<br>gene:ENSG00000127445 /// PIN1 protein gene:ENSG00000127445 /// Homo sapiens cDNA FLJ35651 fis, clone SPLEN2013670. /// Homo sapiens peptidylprolyl cis/trans isomerase, NIMA-interacting 1 (PIN1), mRNA.                                                                                                                                                                                                                                                                                                                                                                                                                                                                                              | peptidylprolyl cis/trans isomerase, NIMA-interacting 1 | 0.008175<br>798 | 1.157712<br>048 |
| NCAPH | Condensin complex subunit 2<br>gene:ENSG00000121152 /// Homo sapiens non-SMC condensin I complex, subunit H, mRNA (cDNA clone MGC:4616 IMAGE:3504782), complete cds. /// Homo sapiens non-SMC condensin I complex, subunit H (NCAPH), mRNA.                                                                                                                                                                                                                                                                                                                                                                                                                                                                                                                     | non-SMC condensin I complex, subunit H                 | 0.002237<br>605 | 1.190448<br>418 |
| CCDC5 | Isoform 1 of Coiled-coil domain-containing protein 5<br>gene:ENSG00000152240 /// Homo sapiens enhancer of invasion-cluster (HEIC) mRNA, complete cds. /// Homo sapiens coiled-coil domain containing 5 (spindle associated) (CCDC5), mRNA.                                                                                                                                                                                                                                                                                                                                                                                                                                                                                                                      | coiled-coil domain containing 5 (spindle associated)   | 0.006056<br>777 | 1.211486<br>834 |

|                            |                                                                                                                                                                                                                                                                                                                                                                                                      |                                                                      |                   |                 |
|----------------------------|------------------------------------------------------------------------------------------------------------------------------------------------------------------------------------------------------------------------------------------------------------------------------------------------------------------------------------------------------------------------------------------------------|----------------------------------------------------------------------|-------------------|-----------------|
| MAD2L1                     | Mitotic spindle assembly checkpoint protein MAD2A<br>gene:ENSG00000164109 /// MAD2 mitotic arrest deficient-like 1 (Yeast), isoform CRA_b<br>gene:ENSG00000164109 /// Homo sapiens MAD2 mitotic arrest deficient-like 1 (yeast), mRNA (cDNA clone MGC:14577 IMAGE:4132892), complete cds. /// Homo sapiens MAD2 mitotic arrest deficient-like 1 (yeast) (MAD2L1), mRNA.                              | MAD2 mitotic arrest deficient-like 1 (yeast)                         | 0.003259<br>19    | 1.169534<br>787 |
| SPC24                      | Kinetochores protein Spc24<br>gene:ENSG00000161888 /// Homo sapiens cDNA FLJ90806 fis, clone Y79AA1000750. /// Homo sapiens SPC24, NDC80 kinetochores complex component, homolog (S. cerevisiae) (SPC24), mRNA.                                                                                                                                                                                      | SPC24, NDC80 kinetochores complex component, homolog (S. cerevisiae) | 0.002954<br>064   | 1.178830<br>986 |
| CEP55                      | Isoform 1 of Centrosomal protein of 55 kDa gene:ENSG00000138180 /// Isoform 2 of Centrosomal protein of 55 kDa gene:ENSG00000138180 /// Homo sapiens URCC6 mRNA for up-regulated in colon cancer 6, complete cds. /// Homo sapiens centrosomal protein 55kDa (CEP55), transcript variant 1, mRNA. /// Homo sapiens centrosomal protein 55kDa (CEP55), transcript variant 2, mRNA.                    | centrosomal protein 55kDa                                            | 0.003988<br>343   | 1.184133<br>567 |
| NUF2                       | Kinetochores protein Nuf2<br>gene:ENSG00000143228 /// Kinetochores protein Nuf2<br>gene:ENSG00000143228 /// Homo sapiens NUF2R mRNA, complete cds. /// Homo sapiens NUF2, NDC80 kinetochores complex component, homolog (S. cerevisiae) (NUF2), transcript variant 2, mRNA. /// Homo sapiens NUF2, NDC80 kinetochores complex component, homolog (S. cerevisiae) (NUF2), transcript variant 1, mRNA. | NUF2, NDC80 kinetochores complex component, homolog (S. cerevisiae)  | 0.000173<br>175   | 1.215092<br>314 |
| <b>Functional Group 20</b> | <b>Transcript Description</b>                                                                                                                                                                                                                                                                                                                                                                        | <b>Gene Title</b>                                                    | <b>Bayes.In p</b> | <b>Fold</b>     |



|       |                                                                                                                                                                                                                                                                                                                                                                                                                                                                                                                                                                           |                         |             |              |
|-------|---------------------------------------------------------------------------------------------------------------------------------------------------------------------------------------------------------------------------------------------------------------------------------------------------------------------------------------------------------------------------------------------------------------------------------------------------------------------------------------------------------------------------------------------------------------------------|-------------------------|-------------|--------------|
| CTSL1 | <p>Cathepsin L1 gene:ENSG00000135047<br/> /// Cathepsin L1<br/> gene:ENSG00000135047 ///<br/> Cathepsin L1 gene:ENSG00000135047<br/> /// Cathepsin L1<br/> gene:ENSG00000135047 /// Homo sapiens cDNA FLJ31037 fis, clone HSYRA2000137, highly similar to CATHEPSIN L PRECURSOR (EC 3.4.22.15). /// Homo sapiens cathepsin L1 (CTSL1), transcript variant 2, mRNA. /// Homo sapiens cathepsin L1 (CTSL1), transcript variant 1, mRNA.</p>                                                                                                                                 | cathepsin L1            | 0.008398077 | -1.150486902 |
| AGA   | <p>N(4)-(beta-N-acetylglucosaminy)-L-asparaginase<br/> gene:ENSG00000038002 /// Homo sapiens aspartylglucosaminidase, mRNA (cDNA clone MGC:9008 IMAGE:3859317), complete cds. /// Homo sapiens aspartylglucosaminidase (AGA), mRNA.</p>                                                                                                                                                                                                                                                                                                                                   | aspartylglucosaminidase | 0.008023485 | 1.248389356  |
| CTSC  | <p>Dipeptidyl-peptidase 1<br/> gene:ENSG00000109861 /// Putative uncharacterized protein CTSC<br/> gene:ENSG00000109861 /// cathepsin C isoform c precursor<br/> gene:ENSG00000109861 /// cathepsin C isoform b precursor<br/> gene:ENSG00000109861 /// Homo sapiens cDNA FLJ55694 complete cds, highly similar to Dipeptidyl-peptidase 1 precursor (EC 3.4.14.1). /// Homo sapiens cathepsin C (CTSC), transcript variant 2, mRNA. /// Homo sapiens cathepsin C (CTSC), transcript variant 3, mRNA. /// Homo sapiens cathepsin C (CTSC), transcript variant 1, mRNA.</p> | cathepsin C             | 0.000472055 | 1.213306947  |
| CTSZ  | <p>34 kDa protein<br/> gene:ENSG00000101160 ///<br/> Cathepsin Z gene:ENSG00000101160<br/> /// Homo sapiens cathepsin X precursor, mRNA, complete cds. /// Homo sapiens cathepsin Z (CTSZ), mRNA.</p>                                                                                                                                                                                                                                                                                                                                                                     | cathepsin Z             | 0.00861216  | 1.16781971   |

|                                |                                                                                                                                                                                                                                                                                                                                                                                             |                                                  |                       |                      |
|--------------------------------|---------------------------------------------------------------------------------------------------------------------------------------------------------------------------------------------------------------------------------------------------------------------------------------------------------------------------------------------------------------------------------------------|--------------------------------------------------|-----------------------|----------------------|
| PCSK1                          | Neuroendocrine convertase 1<br>gene:ENSG00000175426 ///<br>H.sapiens PC1 (NEC1) mRNA,<br>complete cds. /// Homo sapiens<br>proprotein convertase subtilisin/kexin<br>type 1 (PCSK1), mRNA.                                                                                                                                                                                                  | proprotein convertase<br>subtilisin/kexin type 1 | 0.001541<br>315       | -<br>1.474321<br>169 |
| <b>Functional<br/>Group 21</b> | <b>Transcript Description</b>                                                                                                                                                                                                                                                                                                                                                               | <b>Gene Title</b>                                | <b>Bayes.In<br/>p</b> | <b>Fold</b>          |
| NXF1                           | Nuclear RNA export factor 1<br>gene:ENSG00000162231 /// Homo<br>sapiens nuclear RNA export factor 1,<br>mRNA (cDNA clone MGC:40096<br>IMAGE:5248449), complete cds. ///<br>Homo sapiens nuclear RNA export<br>factor 1 (NXF1), transcript variant 1,<br>mRNA. /// Homo sapiens nuclear RNA<br>export factor 1 (NXF1), transcript<br>variant 2, mRNA.                                        | nuclear RNA export<br>factor 1                   | 0.000406<br>125       | -<br>1.234504<br>541 |
| RANGAP1                        | Ran GTPase-activating protein 1<br>gene:ENSG00000100401 /// Ran<br>GTPase-activating protein 1<br>gene:ENSG00000100401 /// Ran<br>GTPase-activating protein 1<br>gene:ENSG00000100401 /// Ran<br>GTPase-activating protein 1<br>gene:ENSG00000100401 /// Homo<br>sapiens mRNA for KIAA1835 protein,<br>partial cds. /// Homo sapiens Ran<br>GTPase activating protein 1<br>(RANGAP1), mRNA. | Ran GTPase activating<br>protein 1               | 0.009675<br>834       | -<br>1.158389<br>866 |

|        |                                                                                                                                                                                                                                                                                                                                                                                                                                                                                                                                                                                                                                                                                                                                                                                                                                                                                                                                                                                                                                           |                                                                         |                         |                         |
|--------|-------------------------------------------------------------------------------------------------------------------------------------------------------------------------------------------------------------------------------------------------------------------------------------------------------------------------------------------------------------------------------------------------------------------------------------------------------------------------------------------------------------------------------------------------------------------------------------------------------------------------------------------------------------------------------------------------------------------------------------------------------------------------------------------------------------------------------------------------------------------------------------------------------------------------------------------------------------------------------------------------------------------------------------------|-------------------------------------------------------------------------|-------------------------|-------------------------|
| ANP32E | <p>acidic (leucine-rich) nuclear phosphoprotein 32 family, member E isoform 3 gene:ENSG00000143401<br/> /// Acidic leucine-rich nuclear phosphoprotein 32 family member E gene:ENSG00000143401<br/> /// Acidic (Leucine-rich) nuclear phosphoprotein 32 family, member E gene:ENSG00000143401<br/> /// Acidic (Leucine-rich) nuclear phosphoprotein 32 family, member E gene:ENSG00000143401<br/> /// Acidic (Leucine-rich) nuclear phosphoprotein 32 family, member E gene:ENSG00000143401<br/> /// Homo sapiens acidic (leucine-rich) nuclear phosphoprotein 32 family, member E, mRNA (cDNA clone MGC:5350 IMAGE:3047915), complete cds. <br/> /// Homo sapiens acidic (leucine-rich) nuclear phosphoprotein 32 family, member E (ANP32E), transcript variant 3, mRNA. <br/> /// Homo sapiens acidic (leucine-rich) nuclear phosphoprotein 32 family, member E (ANP32E), transcript variant 2, mRNA. <br/> /// Homo sapiens acidic (leucine-rich) nuclear phosphoprotein 32 family, member E (ANP32E), transcript variant 1, mRNA.</p> | <p>acidic (leucine-rich) nuclear phosphoprotein 32 family, member E</p> | <p>0.002654<br/>353</p> | <p>1.194348<br/>264</p> |
| ANP32A | <p>ANP32A protein (Fragment) gene:ENSG00000140350<br/> /// cdna:known chromosome:NCBI36:15:66857928:66900261:-1 gene:ENSG00000140350<br/> /// Acidic leucine-rich nuclear phosphoprotein 32 family member A gene:ENSG00000140350<br/> /// hypothetical protein gene:ENSG00000214746<br/> /// Homo sapiens acidic (leucine-rich) nuclear phosphoprotein 32 family, member A, mRNA (cDNA clone MGC:12667 IMAGE:3677623), complete cds. <br/> /// Homo sapiens acidic (leucine-rich) nuclear phosphoprotein 32 family, member A (ANP32A), mRNA.</p>                                                                                                                                                                                                                                                                                                                                                                                                                                                                                          | <p>acidic (leucine-rich) nuclear phosphoprotein 32 family, member A</p> | <p>0.000721<br/>366</p> | <p>1.225751<br/>887</p> |

| Functional Group 22 | Transcript Description                                                                                                                                                                                                                                                                                                                    | Gene Title                                    | Bayes.In p  | Fold        |
|---------------------|-------------------------------------------------------------------------------------------------------------------------------------------------------------------------------------------------------------------------------------------------------------------------------------------------------------------------------------------|-----------------------------------------------|-------------|-------------|
| MFAP5               | Microfibrillar-associated protein 5 gene:ENSG00000197614 /// cDNA FLJ54936, highly similar to Microfibrillar-associated protein 5 gene:ENSG00000197614 /// Homo sapiens microfibrillar associated protein 5, mRNA (cDNA clone MGC:14490 IMAGE:4247343), complete cds. /// Homo sapiens microfibrillar associated protein 5 (MFAP5), mRNA. | microfibrillar associated protein 5           | 0.000367671 | 1.26566102  |
| MAMDC2              | Isoform 1 of MAM domain-containing protein 2 gene:ENSG00000165072 /// Homo sapiens MAM domain containing 2, mRNA (cDNA clone MGC:75273 IMAGE:4399866), complete cds. /// Homo sapiens MAM domain containing 2 (MAMDC2), mRNA.                                                                                                             | MAM domain containing 2                       | 0.000138833 | 1.243509214 |
| OLFML3              | Isoform 1 of Olfactomedin-like protein 3 gene:ENSG00000116774 /// Isoform 2 of Olfactomedin-like protein 3 gene:ENSG00000116774 /// Isoform 2 of Olfactomedin-like protein 3 gene:ENSG00000116774 /// Homo sapiens clone DNA64905 olfactomedin-like (UNQ663) mRNA, complete cds. /// Homo sapiens olfactomedin-like 3 (OLFML3), mRNA.     | olfactomedin-like 3                           | 2.91462E-05 | 1.316797443 |
| SMPDL3A             | Acid sphingomyelinase-like phosphodiesterase 3a gene:ENSG00000172594 /// Homo sapiens sphingomyelin phosphodiesterase, acid-like 3A, mRNA (cDNA clone MGC:20681 IMAGE:3138813), complete cds. /// Homo sapiens sphingomyelin phosphodiesterase, acid-like 3A (SMPDL3A), mRNA.                                                             | sphingomyelin phosphodiesterase, acid-like 3A | 0.003253057 | 1.458250503 |

|                            |                                                                                                                                                                                                                                                                                             |                                                      |                   |             |
|----------------------------|---------------------------------------------------------------------------------------------------------------------------------------------------------------------------------------------------------------------------------------------------------------------------------------------|------------------------------------------------------|-------------------|-------------|
| CA11                       | Carbonic anhydrase-related protein 11 gene:ENSG00000063180 /// Homo sapiens ca xi mRNA for carbonic anhydrase-related protein XI, complete cds. /// Homo sapiens carbonic anhydrase XI (CA11), mRNA.                                                                                        | carbonic anhydrase XI                                | 0.000811052       | 1.252656016 |
| FAM20B                     | Protein FAM20B gene:ENSG00000116199 /// Homo sapiens family with sequence similarity 20, member B, mRNA (cDNA clone MGC:57628 IMAGE:5492043), complete cds. /// Homo sapiens family with sequence similarity 20, member B (FAM20B), mRNA.                                                   | family with sequence similarity 20, member B         | 0.003883056       | 1.168512014 |
| <b>Functional Group 23</b> | <b>Transcript Description</b>                                                                                                                                                                                                                                                               | <b>Gene Title</b>                                    | <b>Bayes.In p</b> | <b>Fold</b> |
| VAR5                       | Valyl-tRNA synthetase gene:ENSG00000096171 /// Valyl-tRNA synthetase gene:ENSG00000204394 /// Homo sapiens valyl-tRNA synthetase, mRNA (cDNA clone MGC:3537 IMAGE:3529215), complete cds. /// Homo sapiens valyl-tRNA synthetase (VAR5), nuclear gene encoding mitochondrial protein, mRNA. | valyl-tRNA synthetase                                | 0.007596587       | 1.153742143 |
| DARS                       | Aspartyl-tRNA synthetase, cytoplasmic gene:ENSG00000115866 /// Human aspartyl-tRNA synthetase alpha-2 subunit mRNA, complete cds. /// Homo sapiens aspartyl-tRNA synthetase (DARS), mRNA.                                                                                                   | aspartyl-tRNA synthetase                             | 0.00105772        | 1.226792589 |
| HARS2                      | Probable histidyl-tRNA synthetase, mitochondrial gene:ENSG00000112855 /// Human histidyl-tRNA synthetase homolog (HO3) mRNA, complete cds. /// Homo sapiens histidyl-tRNA synthetase 2, mitochondrial (putative) (HARS2), nuclear gene encoding mitochondrial protein, mRNA.                | histidyl-tRNA synthetase 2, mitochondrial (putative) | 0.00124126        | 1.225075123 |

|                            |                                                                                                                                                                                                                                                                                                                                                                                                                                                                                                                                                                                    |                                                               |                   |                      |
|----------------------------|------------------------------------------------------------------------------------------------------------------------------------------------------------------------------------------------------------------------------------------------------------------------------------------------------------------------------------------------------------------------------------------------------------------------------------------------------------------------------------------------------------------------------------------------------------------------------------|---------------------------------------------------------------|-------------------|----------------------|
| IARS2                      | Isoleucyl-tRNA synthetase, mitochondrial<br>gene:ENSG00000067704 /// Isoleucyl-tRNA synthetase, mitochondrial<br>gene:ENSG00000067704 /// Homo sapiens isoleucine tRNA synthetase mRNA, complete cds; nuclear gene for mitochondrial product. /// Homo sapiens isoleucyl-tRNA synthetase 2, mitochondrial (IARS2), nuclear gene encoding mitochondrial protein, mRNA.                                                                                                                                                                                                              | isoleucyl-tRNA synthetase 2, mitochondrial                    | 0.000497<br>135   | 1.223551<br>329      |
| PLXNB2                     | 16 kDa protein<br>gene:ENSG00000196576 /// Plexin B2<br>gene:ENSG00000196576 /// Plexin-B2<br>gene:ENSG00000196576 /// Clone MM1 product (Fragment)<br>gene:ENSG00000196576 /// Homo sapiens cDNA FLJ31981 fis, clone NT2RP7008543, weakly similar to PLEXIN 4 PRECURSOR. /// Homo sapiens plexin B2 (PLXNB2), mRNA.                                                                                                                                                                                                                                                               | plexin B2                                                     | 0.000209<br>484   | -<br>1.237411<br>763 |
| <b>Functional Group 24</b> | <b>Transcript Description</b>                                                                                                                                                                                                                                                                                                                                                                                                                                                                                                                                                      | <b>Gene Title</b>                                             | <b>Bayes.In p</b> | <b>Fold</b>          |
| SEPSECS                    | Isoform 1 of O-phosphoseryl-tRNA(Sec) selenium transferase<br>gene:ENSG00000109618 /// Isoform 2 of O-phosphoseryl-tRNA(Sec) selenium transferase<br>gene:ENSG00000109618 /// Isoform 1 of O-phosphoseryl-tRNA(Sec) selenium transferase<br>gene:ENSG00000109618 /// Homo sapiens mRNA; cDNA DKFZp686J1361 (from clone DKFZp686J1361). /// Homo sapiens Sep (O-phosphoserine) tRNA:Sec (selenocysteine) tRNA synthase (SEPSECS), transcript variant 2, mRNA. /// Homo sapiens Sep (O-phosphoserine) tRNA:Sec (selenocysteine) tRNA synthase (SEPSECS), transcript variant 1, mRNA. | Sep (O-phosphoserine) tRNA:Sec (selenocysteine) tRNA synthase | 0.002586<br>286   | 1.227617<br>21       |

|        |                                                                                                                                                                                                                                                                                                                                                                                                                                                                                                                                                                                                                                                                                                                                                                                |                                                       |                 |                      |
|--------|--------------------------------------------------------------------------------------------------------------------------------------------------------------------------------------------------------------------------------------------------------------------------------------------------------------------------------------------------------------------------------------------------------------------------------------------------------------------------------------------------------------------------------------------------------------------------------------------------------------------------------------------------------------------------------------------------------------------------------------------------------------------------------|-------------------------------------------------------|-----------------|----------------------|
| EIF4B  | cDNA FLJ54492, highly similar to Eukaryotic translation initiation factor 4B gene:ENSG00000063046 /// Homo sapiens eukaryotic translation initiation factor 4B, mRNA (cDNA clone MGC:88035 IMAGE:6527540), complete cds. /// Homo sapiens eukaryotic translation initiation factor 4B (EIF4B), mRNA.                                                                                                                                                                                                                                                                                                                                                                                                                                                                           | eukaryotic translation initiation factor 4B           | 0.188822<br>525 | 1.066263<br>671      |
| EIF2C1 | Eukaryotic translation initiation factor 2C, 1 gene:ENSG00000092847 /// Eukaryotic translation initiation factor 2C 1 gene:ENSG00000092847 /// Homo sapiens putative RNA-binding protein Q99 mRNA, complete cds. /// Homo sapiens eukaryotic translation initiation factor 2C, 1 (EIF2C1), mRNA.                                                                                                                                                                                                                                                                                                                                                                                                                                                                               | eukaryotic translation initiation factor 2C, 1        | 0.006046<br>515 | 1.163962<br>818      |
| CPEB2  | 66 kDa protein gene:ENSG00000137449 /// Isoform 1 of Cytoplasmic polyadenylation element-binding protein 2 gene:ENSG00000137449 /// Isoform 5 of Cytoplasmic polyadenylation element-binding protein 2 gene:ENSG00000137449 /// Isoform 4 of Cytoplasmic polyadenylation element-binding protein 2 gene:ENSG00000137449 /// Isoform 2 of Cytoplasmic polyadenylation element-binding protein 2 gene:ENSG00000137449 /// Homo sapiens cytoplasmic polyadenylation element binding protein 2, mRNA (cDNA clone MGC:119575 IMAGE:40008489), complete cds. /// Homo sapiens cytoplasmic polyadenylation element binding protein 2 (CPEB2), transcript variant B, mRNA. /// Homo sapiens cytoplasmic polyadenylation element binding protein 2 (CPEB2), transcript variant A, mRNA. | cytoplasmic polyadenylation element binding protein 2 | 0.001362<br>494 | -<br>1.227181<br>426 |

|                            |                                                                                                                                                                                                                                                                                                                                                                                                                                                                                                                                                                                                                                                                                                                                                                                                                                                                                                        |                                                             |                   |                      |
|----------------------------|--------------------------------------------------------------------------------------------------------------------------------------------------------------------------------------------------------------------------------------------------------------------------------------------------------------------------------------------------------------------------------------------------------------------------------------------------------------------------------------------------------------------------------------------------------------------------------------------------------------------------------------------------------------------------------------------------------------------------------------------------------------------------------------------------------------------------------------------------------------------------------------------------------|-------------------------------------------------------------|-------------------|----------------------|
| EIF4E2                     | Eukaryotic translation initiation factor 4E type 2 gene:ENSG00000135930 /// cdna:known chromosome:NCBI36:2:233123637:23 3156598:1 gene:ENSG00000135930 /// cdna:known chromosome:NCBI36:2:233123637:23 3156596:1 gene:ENSG00000135930 /// Eukaryotic translation initiation factor 4E member 2 variant (Fragment) gene:ENSG00000135930 /// cdna:known chromosome:NCBI36:2:233123643:23 3140974:1 gene:ENSG00000135930 /// cdna:known chromosome:NCBI36:2:233123643:23 3140481:1 gene:ENSG00000135930 /// cdna:known chromosome:NCBI36:2:233123646:23 3142132:1 gene:ENSG00000135930 /// cdna:known chromosome:NCBI36:2:233123658:23 3153910:1 gene:ENSG00000135930 /// Homo sapiens eukaryotic translation initiation factor 4E family member 2, mRNA (cDNA clone MGC:12525 IMAGE:3997986), complete cds. /// Homo sapiens eukaryotic translation initiation factor 4E family member 2 (EIF4E2), mRNA. | eukaryotic translation initiation factor 4E family member 2 | 0.009513<br>27    | 1.169079<br>777      |
| <b>Functional Group 25</b> | <b>Transcript Description</b>                                                                                                                                                                                                                                                                                                                                                                                                                                                                                                                                                                                                                                                                                                                                                                                                                                                                          | <b>Gene Title</b>                                           | <b>Bayes.In p</b> | <b>Fold</b>          |
| NID1                       | Isoform 1 of Nidogen-1 gene:ENSG00000116962 /// Isoform 2 of Nidogen-1 gene:ENSG00000116962 /// Homo sapiens nidogen 1, mRNA (cDNA clone MGC:33141 IMAGE:5271590), complete cds. /// Homo sapiens nidogen 1 (NID1), mRNA.                                                                                                                                                                                                                                                                                                                                                                                                                                                                                                                                                                                                                                                                              | nidogen 1                                                   | 6.38654E<br>-05   | -<br>1.269876<br>893 |



|       |                                                                                                                                                                                                                                                                                                                                                                                                                                                                                                                                                                                                                                                                                    |                                                   |                 |                      |
|-------|------------------------------------------------------------------------------------------------------------------------------------------------------------------------------------------------------------------------------------------------------------------------------------------------------------------------------------------------------------------------------------------------------------------------------------------------------------------------------------------------------------------------------------------------------------------------------------------------------------------------------------------------------------------------------------|---------------------------------------------------|-----------------|----------------------|
| FAT3  | cdna:known<br>chromosome:NCBI36:11:91724910:92<br>269284:1 gene:ENSG00000165323 ///<br>Isoform 1 of Protocadherin Fat 3<br>gene:ENSG00000165323 /// Homo<br>sapiens FAT tumor suppressor<br>homolog 3 (Drosophila) (FAT3),<br>mRNA.                                                                                                                                                                                                                                                                                                                                                                                                                                                | FAT tumor suppressor<br>homolog 3<br>(Drosophila) | 0.000181<br>836 | -<br>1.302095<br>111 |
| NELL2 | NEL-like 2 (Chicken), isoform CRA_a<br>gene:ENSG00000184613 /// Protein<br>kinase C-binding protein NELL2<br>gene:ENSG00000184613 /// Homo<br>sapiens mRNA for nel-related protein<br>2, complete cds. /// Homo sapiens<br>NEL-like 2 (chicken) (NELL2), mRNA.                                                                                                                                                                                                                                                                                                                                                                                                                     | NEL-like 2 (chicken)                              | 0.009863<br>348 | -<br>1.150640<br>829 |
| FBLN1 | Isoform B of Fibulin-1<br>gene:ENSG00000077942 /// Isoform<br>D of Fibulin-1<br>gene:ENSG00000077942 /// fibulin 1<br>isoform B precursor<br>gene:ENSG00000077942 /// Isoform<br>C of Fibulin-1<br>gene:ENSG00000077942 /// Isoform<br>A of Fibulin-1<br>gene:ENSG00000077942 /// Fibulin 1<br>gene:ENSG00000077942 /// Homo<br>sapiens fibulin-1 isoform D precursor,<br>mRNA, complete cds. /// Homo<br>sapiens fibulin 1 (FBLN1), transcript<br>variant C, mRNA. /// Homo sapiens<br>fibulin 1 (FBLN1), transcript variant D,<br>mRNA. /// Homo sapiens fibulin 1<br>(FBLN1), transcript variant A, mRNA.<br>/// Homo sapiens fibulin 1 (FBLN1),<br>transcript variant B, mRNA. | fibulin 1                                         | 0.006874<br>576 | -<br>1.162672<br>2   |

|       |                                                                                                                                                                                                                                                                                                                                                                                                                                                                                                                                                                                                                                                                                                                                                                       |                                                                                     |                 |                      |
|-------|-----------------------------------------------------------------------------------------------------------------------------------------------------------------------------------------------------------------------------------------------------------------------------------------------------------------------------------------------------------------------------------------------------------------------------------------------------------------------------------------------------------------------------------------------------------------------------------------------------------------------------------------------------------------------------------------------------------------------------------------------------------------------|-------------------------------------------------------------------------------------|-----------------|----------------------|
| FBLN7 | <p>Isoform 1 of Fibulin-7<br/> gene:ENSG00000144152 ///<br/> cdna:known<br/> chromosome:NCBI36:2:112612474:11<br/> 2662246:1 gene:ENSG00000144152<br/> /// cdna:known<br/> chromosome:NCBI36:2:112612631:11<br/> 2661693:1 gene:ENSG00000144152<br/> /// cdna:known<br/> chromosome:NCBI36:2:112612631:11<br/> 2661687:1 gene:ENSG00000144152<br/> /// Isoform 2 of Fibulin-7<br/> gene:ENSG00000144152 /// Homo<br/> sapiens fibulin 7, mRNA (cDNA clone<br/> MGC:46268 IMAGE:5589120),<br/> complete cds. /// Homo sapiens<br/> fibulin 7 (FBLN7), transcript variant 1,<br/> mRNA. /// Homo sapiens fibulin 7<br/> (FBLN7), transcript variant 2, mRNA.</p>                                                                                                        | fibulin 7                                                                           | 0.009131<br>177 | -<br>1.274710<br>834 |
| SVEP1 | <p>391 kDa protein<br/> gene:ENSG00000165124 /// polydom<br/> gene:ENSG00000165124 /// Isoform<br/> 3 of Sushi, von Willebrand factor type<br/> A, EGF and pentraxin domain-<br/> containing protein 1<br/> gene:ENSG00000165124 /// polydom<br/> gene:ENSG00000165124 /// Isoform<br/> 1 of Sushi, von Willebrand factor type<br/> A, EGF and pentraxin domain-<br/> containing protein 1<br/> gene:ENSG00000165124 /// Isoform<br/> 2 of Sushi, von Willebrand factor type<br/> A, EGF and pentraxin domain-<br/> containing protein 1<br/> gene:ENSG00000165124 /// Homo<br/> sapiens selectin-like protein mRNA,<br/> complete cds. /// Homo sapiens<br/> sushi, von Willebrand factor type A,<br/> EGF and pentraxin domain containing<br/> 1 (SVEP1), mRNA.</p> | sushi, von Willebrand<br>factor type A, EGF and<br>pentraxin domain<br>containing 1 | 0.000315<br>517 | -<br>1.322326<br>065 |

|          |                                                                                                                                                                                                                                                                                                                                                                                                                                                                                                                                                                                                                                                                                                                                                                                                                                                                                                                                                                                                                                                                                                                                                                                                                                                                                                                                                                                                                                                                                                                                                                                                                                                                    |                                                                                                                                                                                                                                                                                                                                                                                                                                                                                                                                                                                                                                            |                          |                                 |
|----------|--------------------------------------------------------------------------------------------------------------------------------------------------------------------------------------------------------------------------------------------------------------------------------------------------------------------------------------------------------------------------------------------------------------------------------------------------------------------------------------------------------------------------------------------------------------------------------------------------------------------------------------------------------------------------------------------------------------------------------------------------------------------------------------------------------------------------------------------------------------------------------------------------------------------------------------------------------------------------------------------------------------------------------------------------------------------------------------------------------------------------------------------------------------------------------------------------------------------------------------------------------------------------------------------------------------------------------------------------------------------------------------------------------------------------------------------------------------------------------------------------------------------------------------------------------------------------------------------------------------------------------------------------------------------|--------------------------------------------------------------------------------------------------------------------------------------------------------------------------------------------------------------------------------------------------------------------------------------------------------------------------------------------------------------------------------------------------------------------------------------------------------------------------------------------------------------------------------------------------------------------------------------------------------------------------------------------|--------------------------|---------------------------------|
| NOTCH2NL | <p>cdna:known<br/> supercontig::NT_113872:169895:176<br/> 054:1 gene:ENSG00000215620 ///<br/> NBPF8 isoform 4<br/> gene:ENSG00000179571 ///<br/> Uncharacterized protein<br/> ENSP00000358372<br/> gene:ENSG00000162825 ///<br/> Uncharacterized protein<br/> ENSP00000358380 (Fragment)<br/> gene:ENSG00000162825 /// Putative<br/> uncharacterized protein<br/> ENSP00000349255<br/> gene:ENSG00000162825 ///<br/> Uncharacterized protein<br/> ENSP00000358384 (Fragment)<br/> gene:ENSG00000162825 /// Putative<br/> uncharacterized protein<br/> ENSP00000358379 (Fragment)<br/> gene:ENSG00000162825 /// NBPF8<br/> isoform 2 gene:ENSG00000186275<br/> /// 70 kDa protein<br/> gene:ENSG00000168614 ///<br/> Neuroblastoma breakpoint family<br/> member 20 gene:ENSG00000168614<br/> /// Isoform 2 of Notch homolog 2 N-<br/> terminal-like protein<br/> gene:ENSG00000213240 /// Isoform<br/> 2 of Notch homolog 2 N-terminal-like<br/> protein gene:ENSG00000213240 ///<br/> Novel protein<br/> gene:ENSG00000163386 /// Putative<br/> uncharacterized protein NBPF9<br/> gene:ENSG00000163386 /// cDNA<br/> FLJ60244, weakly similar to Homo<br/> sapiens phosphodiesterase 4D<br/> interacting protein, transcript variant<br/> 1, mRNA gene:ENSG00000163386 ///<br/> Putative uncharacterized protein<br/> NBPF9 gene:ENSG00000163386 ///<br/> Putative uncharacterized protein<br/> NBPF9 gene:ENSG00000163386 ///</p> | <p>KIAA1245 ///<br/> neuroblastoma<br/> breakpoint family,<br/> member 1 /// Notch<br/> homolog 2<br/> (Drosophila) N-<br/> terminal like ///<br/> neuroblastoma<br/> breakpoint family,<br/> member 9 ///<br/> neuroblastoma<br/> breakpoint family,<br/> member 14 ///<br/> hypothetical protein<br/> LOC200030 ///<br/> neuroblastoma<br/> breakpoint family,<br/> member 20 ///<br/> neuroblastoma<br/> breakpoint family,<br/> member 10 ///<br/> neuroblastoma<br/> breakpoint family,<br/> member 15 ///<br/> neuroblastoma<br/> breakpoint family,<br/> member 8 ///<br/> neuroblastoma<br/> breakpoint family,<br/> member 16</p> | <p>0.008807<br/> 102</p> | <p>-<br/> 1.129728<br/> 487</p> |
|----------|--------------------------------------------------------------------------------------------------------------------------------------------------------------------------------------------------------------------------------------------------------------------------------------------------------------------------------------------------------------------------------------------------------------------------------------------------------------------------------------------------------------------------------------------------------------------------------------------------------------------------------------------------------------------------------------------------------------------------------------------------------------------------------------------------------------------------------------------------------------------------------------------------------------------------------------------------------------------------------------------------------------------------------------------------------------------------------------------------------------------------------------------------------------------------------------------------------------------------------------------------------------------------------------------------------------------------------------------------------------------------------------------------------------------------------------------------------------------------------------------------------------------------------------------------------------------------------------------------------------------------------------------------------------------|--------------------------------------------------------------------------------------------------------------------------------------------------------------------------------------------------------------------------------------------------------------------------------------------------------------------------------------------------------------------------------------------------------------------------------------------------------------------------------------------------------------------------------------------------------------------------------------------------------------------------------------------|--------------------------|---------------------------------|

|  |                                                                                                                                                                                                                                                                                                                                                                                                                                                                                                                                                                                                                                                                                                                                                                                                                                                                                                                                                                                                                                                                                                                                                                                                                                                                                                                                                                                                                                                                                                                                                                                                                                                    |  |  |  |
|--|----------------------------------------------------------------------------------------------------------------------------------------------------------------------------------------------------------------------------------------------------------------------------------------------------------------------------------------------------------------------------------------------------------------------------------------------------------------------------------------------------------------------------------------------------------------------------------------------------------------------------------------------------------------------------------------------------------------------------------------------------------------------------------------------------------------------------------------------------------------------------------------------------------------------------------------------------------------------------------------------------------------------------------------------------------------------------------------------------------------------------------------------------------------------------------------------------------------------------------------------------------------------------------------------------------------------------------------------------------------------------------------------------------------------------------------------------------------------------------------------------------------------------------------------------------------------------------------------------------------------------------------------------|--|--|--|
|  | <p>Putative uncharacterized protein NBPF9 gene:ENSG00000163386 ///</p> <p>Putative uncharacterized protein NBPF9 gene:ENSG00000163386 ///</p> <p>Putative uncharacterized protein NBPF9 gene:ENSG00000163386 ///</p> <p>104 kDa protein gene:ENSG00000152042 /// 97 kDa protein gene:ENSG00000152042 ///</p> <p>Neuroblastoma breakpoint family member 11 gene:ENSG00000152042 ///</p> <p>hypothetical protein LOC200030 gene:ENSG00000152042 /// NBPF8 isoform 5 gene:ENSG00000152042 ///</p> <p>hypothetical protein gene:ENSG00000187820 /// 104 kDa protein gene:ENSG00000203836 ///</p> <p>97 kDa protein gene:ENSG00000203836 ///</p> <p>Neuroblastoma breakpoint family member 21 gene:ENSG00000203836 ///</p> <p>Neuroblastoma breakpoint family, member 11 gene:ENSG00000203836 ///</p> <p>90 kDa protein gene:ENSG00000203836 ///</p> <p>Neuroblastoma breakpoint family member 14 gene:ENSG00000122497 ///</p> <p>71 kDa protein gene:ENSG00000122497 ///</p> <p>Neuroblastoma breakpoint family member 16 gene:ENSG00000122497 ///</p> <p>Putative uncharacterized protein NBPF14 gene:ENSG00000122497 ///</p> <p>Neuroblastoma breakpoint family, member 10 gene:ENSG00000203832 ///</p> <p>Novel protein gene:ENSG00000203832 ///</p> <p>Putative uncharacterized protein NBPF8 gene:ENSG00000203832 ///</p> <p>Putative uncharacterized protein NBPF8 gene:ENSG00000203832 ///</p> <p>CG10522-PA-like gene:ENSG00000203832 ///</p> <p>Putative uncharacterized protein NBPF8 gene:ENSG00000203832 ///</p> <p>Putative uncharacterized protein NBPF8 (Fragment) gene:ENSG00000203832 ///</p> <p>Neuroblastoma breakpoint family,</p> |  |  |  |
|--|----------------------------------------------------------------------------------------------------------------------------------------------------------------------------------------------------------------------------------------------------------------------------------------------------------------------------------------------------------------------------------------------------------------------------------------------------------------------------------------------------------------------------------------------------------------------------------------------------------------------------------------------------------------------------------------------------------------------------------------------------------------------------------------------------------------------------------------------------------------------------------------------------------------------------------------------------------------------------------------------------------------------------------------------------------------------------------------------------------------------------------------------------------------------------------------------------------------------------------------------------------------------------------------------------------------------------------------------------------------------------------------------------------------------------------------------------------------------------------------------------------------------------------------------------------------------------------------------------------------------------------------------------|--|--|--|

|  |                                                                                                                                                                                                                                                                                                                                                                                                                                                                                                                                                                                                                                                                                                                                                                                                                                                                                                                                                                                                                                                                                                                                                                                                                                                                                                                                                                                                                                                                                                                                                                                                                                                                                                                                                                                                                                                                           |  |  |  |
|--|---------------------------------------------------------------------------------------------------------------------------------------------------------------------------------------------------------------------------------------------------------------------------------------------------------------------------------------------------------------------------------------------------------------------------------------------------------------------------------------------------------------------------------------------------------------------------------------------------------------------------------------------------------------------------------------------------------------------------------------------------------------------------------------------------------------------------------------------------------------------------------------------------------------------------------------------------------------------------------------------------------------------------------------------------------------------------------------------------------------------------------------------------------------------------------------------------------------------------------------------------------------------------------------------------------------------------------------------------------------------------------------------------------------------------------------------------------------------------------------------------------------------------------------------------------------------------------------------------------------------------------------------------------------------------------------------------------------------------------------------------------------------------------------------------------------------------------------------------------------------------|--|--|--|
|  | <p>member 10 gene:ENSG00000203832<br/> /// Isoform 2 of Neuroblastoma<br/> breakpoint family member 10<br/> gene:ENSG00000203832 ///</p> <p>Neuroblastoma breakpoint family,<br/> member 15 gene:ENSG00000219481<br/> /// Putative uncharacterized protein<br/> NBPF15 gene:ENSG00000219481 ///</p> <p>Neuroblastoma breakpoint family,<br/> member 16 gene:ENSG00000203827<br/> /// Putative uncharacterized protein<br/> NBPF16 (Fragment)<br/> gene:ENSG00000203827 ///</p> <p>Homo sapiens mRNA for KIAA1245 protein,<br/> partial cds. ///</p> <p>Homo sapiens mRNA for KIAA1693 protein,<br/> partial cds. ///</p> <p>Homo sapiens cDNA FLJ90584 fis,<br/> clone PLACE1000740, highly similar to<br/> Neurogenic locus notch homolog<br/> protein 2 precursor. ///</p> <p>Homo sapiens cDNA FLJ60244 complete cds,<br/> weakly similar to Homo sapiens<br/> phosphodiesterase 4D interacting<br/> protein, transcript variant 1, mRNA.<br/> /// Homo sapiens cDNA FLJ60520<br/> complete cds, weakly similar to Homo<br/> sapiens phosphodiesterase 4D<br/> interacting protein, transcript variant<br/> 1, mRNA. ///</p> <p>Homo sapiens mRNA; cDNA DKFZp451B1418<br/> (from clone DKFZp451B1418); complete cds. ///</p> <p>Homo sapiens clone Illc8 NBPF9<br/> isoform 2 mRNA, complete cds,<br/> alternatively spliced. ///</p> <p>Homo sapiens neuroblastoma breakpoint<br/> family, member 10, mRNA (cDNA<br/> clone IMAGE:5090304). ///</p> <p>Homo sapiens neuroblastoma breakpoint<br/> family, member 15, mRNA (cDNA<br/> clone MGC:8902 IMAGE:3918932),<br/> complete cds. ///</p> <p>Homo sapiens neuroblastoma breakpoint<br/> family, member 8, mRNA (cDNA clone<br/> MGC:99641 IMAGE:5453529),<br/> complete cds. ///</p> <p>Homo sapiens hypothetical protein LOC200030<br/> (LOC200030), mRNA. ///</p> <p>Homo sapiens neuroblastoma breakpoint</p> |  |  |  |
|--|---------------------------------------------------------------------------------------------------------------------------------------------------------------------------------------------------------------------------------------------------------------------------------------------------------------------------------------------------------------------------------------------------------------------------------------------------------------------------------------------------------------------------------------------------------------------------------------------------------------------------------------------------------------------------------------------------------------------------------------------------------------------------------------------------------------------------------------------------------------------------------------------------------------------------------------------------------------------------------------------------------------------------------------------------------------------------------------------------------------------------------------------------------------------------------------------------------------------------------------------------------------------------------------------------------------------------------------------------------------------------------------------------------------------------------------------------------------------------------------------------------------------------------------------------------------------------------------------------------------------------------------------------------------------------------------------------------------------------------------------------------------------------------------------------------------------------------------------------------------------------|--|--|--|

|                            |                                                                                                                                                                                                                                                                 |                   |                   |             |
|----------------------------|-----------------------------------------------------------------------------------------------------------------------------------------------------------------------------------------------------------------------------------------------------------------|-------------------|-------------------|-------------|
|                            | family, member 16 (NBPF16), mRNA.<br>/// Homo sapiens neuroblastoma breakpoint family, member 14 (NBPF14), mRNA.                                                                                                                                                |                   |                   |             |
| <b>Functional Group 26</b> | <b>Transcript Description</b>                                                                                                                                                                                                                                   | <b>Gene Title</b> | <b>Bayes.In p</b> | <b>Fold</b> |
| HK2                        | Hexokinase-2<br>gene:ENSG00000159399 ///<br>cdna:known<br>chromosome:NCBI36:2:74915805:74973994:1 gene:ENSG00000159399 ///<br>Homo sapiens hexokinase 2, mRNA (cDNA clone MGC:74789 IMAGE:5586773), complete cds. ///<br>Homo sapiens hexokinase 2 (HK2), mRNA. | hexokinase 2      | 9.23437E-09       | 1.598668999 |

|        |                                                                                                                                                                                                                                                                                                                                                                                                                                                           |                                         |             |              |
|--------|-----------------------------------------------------------------------------------------------------------------------------------------------------------------------------------------------------------------------------------------------------------------------------------------------------------------------------------------------------------------------------------------------------------------------------------------------------------|-----------------------------------------|-------------|--------------|
| PFKM   | cDNA FLJ44241 fis, clone THYMU3008436, highly similar to 6-phosphofructokinase, muscle type gene:ENSG00000152556 /// Isoform 1 of 6-phosphofructokinase, muscle type gene:ENSG00000152556 /// Isoform 2 of 6-phosphofructokinase, muscle type gene:ENSG00000152556 /// Homo sapiens cDNA FLJ44241 fis, clone THYMU3008436, highly similar to 6-phosphofructokinase, muscle type (EC 2.7.1.11). /// Homo sapiens phosphofructokinase, muscle (PFKM), mRNA. | phosphofructokinase, muscle             | 0.008182424 | 1.16915528   |
| ENO2   | Gamma-enolase gene:ENSG00000111674 /// Homo sapiens enolase 2 (gamma, neuronal), mRNA (cDNA clone MGC:3520 IMAGE:3629603), complete cds. /// Homo sapiens enolase 2 (gamma, neuronal) (ENO2), mRNA.                                                                                                                                                                                                                                                       | enolase 2 (gamma, neuronal)             | 0.00467409  | -1.163118025 |
| HIBADH | 3-hydroxyisobutyrate dehydrogenase, mitochondrial gene:ENSG00000106049 /// Homo sapiens mRNA for 3'-hydroxyisobutyrate dehydrogenase, complete cds. /// Homo sapiens 3-hydroxyisobutyrate dehydrogenase (HIBADH), mRNA.                                                                                                                                                                                                                                   | 3-hydroxyisobutyrate dehydrogenase      | 0.000475911 | 1.196599175  |
| PDHB   | Isoform 2 of Pyruvate dehydrogenase E1 component subunit beta, mitochondrial gene:ENSG00000168291 /// Isoform 1 of Pyruvate dehydrogenase E1 component subunit beta, mitochondrial gene:ENSG00000168291 /// Homo sapiens mRNA for Pyruvate dehydrogenase E1 component beta subunit, mitochondrial precursor variant, clone: SPL02706. /// Homo sapiens pyruvate dehydrogenase (lipoamide) beta (PDHB), mRNA.                                              | pyruvate dehydrogenase (lipoamide) beta | 0.008282689 | 1.151141848  |

|                            |                                                                                                                                                                                                                                                                                                                                                                                                                                                       |                                                     |                   |             |
|----------------------------|-------------------------------------------------------------------------------------------------------------------------------------------------------------------------------------------------------------------------------------------------------------------------------------------------------------------------------------------------------------------------------------------------------------------------------------------------------|-----------------------------------------------------|-------------------|-------------|
| ALDOC                      | Fructose-bisphosphate aldolase C<br>gene:ENSG00000109107 /// Fructose-bisphosphate aldolase<br>gene:ENSG00000109107 /// Fructose-bisphosphate aldolase C<br>gene:ENSG00000109107 /// Homo sapiens aldolase C, fructose-bisphosphate, mRNA (cDNA clone MGC:1449 IMAGE:2987869), complete cds. /// Homo sapiens aldolase C, fructose-bisphosphate (ALDOC), mRNA.                                                                                        | aldolase C, fructose-bisphosphate                   | 0.000115049       | 1.286917053 |
| LDHA                       | Isoform 1 of L-lactate dehydrogenase A chain gene:ENSG00000134333 /// Isoform 2 of L-lactate dehydrogenase A chain gene:ENSG00000134333 /// L-lactate dehydrogenase gene:ENSG00000134333 /// Homo sapiens lactate dehydrogenase A, mRNA (cDNA clone MGC:72033 IMAGE:4096518), complete cds. /// Homo sapiens lactate dehydrogenase A (LDHA), transcript variant 1, mRNA. /// Homo sapiens lactate dehydrogenase A (LDHA), transcript variant 2, mRNA. | lactate dehydrogenase A                             | 0.003721276       | 1.1839922   |
| <b>Functional Group 27</b> | <b>Transcript Description</b>                                                                                                                                                                                                                                                                                                                                                                                                                         | <b>Gene Title</b>                                   | <b>Bayes.In p</b> | <b>Fold</b> |
| IGFBP5                     | Insulin-like growth factor-binding protein 5 gene:ENSG00000115461 /// Human insulin-like growth factor binding protein 5 (IGFBP-5) mRNA, complete cds. /// Homo sapiens insulin-like growth factor binding protein 5 (IGFBP5), mRNA.                                                                                                                                                                                                                  | insulin-like growth factor binding protein 5        | 1.11688E-13       | 2.172203639 |
| IGFBP2                     | Insulin-like growth factor-binding protein 2 gene:ENSG00000115457 /// Homo sapiens insulin-like growth factor binding protein 2, 36kDa, mRNA (cDNA clone MGC:10918 IMAGE:3627826), complete cds. /// Homo sapiens insulin-like growth factor binding protein 2, 36kDa (IGFBP2), mRNA.                                                                                                                                                                 | insulin-like growth factor binding protein 2, 36kDa | 0.004095392       | 1.163713326 |



|                            |                                                                                                                                                                                                                                                                         |                                              |                   |               |
|----------------------------|-------------------------------------------------------------------------------------------------------------------------------------------------------------------------------------------------------------------------------------------------------------------------|----------------------------------------------|-------------------|---------------|
| IGFBP4                     | Insulin-like growth factor-binding protein 4 gene:ENSG00000141753 /// Homo sapiens insulin-like growth factor binding protein 4, mRNA (cDNA clone MGC:20162 IMAGE:4661581), complete cds. /// Homo sapiens insulin-like growth factor binding protein 4 (IGFBP4), mRNA. | insulin-like growth factor binding protein 4 | 7.12128E-06       | - 1.30573276  |
| IGFBP6                     | Insulin-like growth factor-binding protein 6 gene:ENSG00000167779 /// Homo sapiens insulin-like growth factor binding protein 6, mRNA (cDNA clone MGC:19772 IMAGE:3640964), complete cds. /// Homo sapiens insulin-like growth factor binding protein 6 (IGFBP6), mRNA. | insulin-like growth factor binding protein 6 | 6.2741E-05        | 1.244184148   |
| <b>Functional Group 28</b> | <b>Transcript Description</b>                                                                                                                                                                                                                                           | <b>Gene Title</b>                            | <b>Bayes.In p</b> | <b>Fold</b>   |
| CA14                       | Carbonic anhydrase 14 gene:ENSG00000118298 /// Homo sapiens cDNA FLJ90284 fis, clone NT2RP1000613, weakly similar to CARBONIC ANHYDRASE VI (EC 4.2.1.1). /// Homo sapiens carbonic anhydrase XIV (CA14), mRNA.                                                          | carbonic anhydrase XIV                       | 0.000351389       | 1.233556271   |
| CA13                       | Carbonic anhydrase 13 gene:ENSG00000185015 /// Homo sapiens carbonic anhydrase XIII, mRNA (cDNA clone MGC:59868 IMAGE:6083105), complete cds. /// Homo sapiens carbonic anhydrase XIII (CA13), mRNA.                                                                    | carbonic anhydrase XIII                      | 0.002780801       | - 1.337627917 |
| CA8                        | Carbonic anhydrase-related protein gene:ENSG00000178538 /// Homo sapiens carbonic anhydrase VIII, mRNA (cDNA clone MGC:120502 IMAGE:40025442), complete cds. /// Homo sapiens carbonic anhydrase VIII (CA8), mRNA.                                                      | carbonic anhydrase VIII                      | 9.14267E-06       | - 1.437893272 |

|          |                                                                                                                                                                                                                                                                                                                                                                                                                                                                   |                                                      |                 |                      |
|----------|-------------------------------------------------------------------------------------------------------------------------------------------------------------------------------------------------------------------------------------------------------------------------------------------------------------------------------------------------------------------------------------------------------------------------------------------------------------------|------------------------------------------------------|-----------------|----------------------|
| CA6      | CA6 protein gene:ENSG00000131686<br>/// Carbonic anhydrase VI nirs variant 1 gene:ENSG00000131686 /// cDNA FLJ60163, highly similar to Carbonic anhydrase 6 gene:ENSG00000131686<br>/// Carbonic anhydrase VI nirs variant 3 gene:ENSG00000131686 /// Human carbonic anhydrase isozyme VI (CA6) mRNA, complete cds. /// Homo sapiens carbonic anhydrase VI (CA6), mRNA.                                                                                           | carbonic anhydrase VI                                | 0.009748<br>868 | -<br>1.334004<br>402 |
| NOB1     | RNA-binding protein NOB1 gene:ENSG00000141101 /// Homo sapiens RNA-binding protein NOB1 mRNA, complete cds. /// Homo sapiens NIN1/RPN12 binding protein 1 homolog (S. cerevisiae) (NOB1), mRNA.                                                                                                                                                                                                                                                                   | NIN1/RPN12 binding protein 1 homolog (S. cerevisiae) | 0.003266<br>145 | 1.192903<br>08       |
| CA10     | Carbonic anhydrase-related protein 10 gene:ENSG00000154975 /// Putative uncharacterized protein DKFZp686I20267 gene:ENSG00000154975 /// Homo sapiens carbonic anhydrase X, mRNA (cDNA clone MGC:87062 IMAGE:5260321), complete cds. /// Homo sapiens carbonic anhydrase X (CA10), transcript variant 2, mRNA. /// Homo sapiens carbonic anhydrase X (CA10), transcript variant 1, mRNA. /// Homo sapiens carbonic anhydrase X (CA10), transcript variant 3, mRNA. | carbonic anhydrase X                                 | 0.000139<br>323 | -<br>1.481043<br>797 |
| CA11     | Carbonic anhydrase-related protein 11 gene:ENSG00000063180 /// Homo sapiens ca xi mRNA for carbonic anhydrase-related protein XI, complete cds. /// Homo sapiens carbonic anhydrase XI (CA11), mRNA.                                                                                                                                                                                                                                                              | carbonic anhydrase XI                                | 0.000811<br>052 | 1.252656<br>016      |
| LOC91431 | Isoform 1 of Uncharacterized protein FLJ44066 gene:ENSG00000188014 /// Homo sapiens mRNA; cDNA DKFZp313L226 (from clone DKFZp313L226). /// Homo sapiens prematurely terminated mRNA decay factor-like (LOC91431), mRNA.                                                                                                                                                                                                                                           | prematurely terminated mRNA decay factor-like        | 0.000309<br>304 | -<br>1.283344<br>003 |

| Functional Group 29 | Transcript Description                                                                                                                                                                                                                                                                                                                                                                                                                                                                                                              | Gene Title                                            | Bayes.In p  | Fold         |
|---------------------|-------------------------------------------------------------------------------------------------------------------------------------------------------------------------------------------------------------------------------------------------------------------------------------------------------------------------------------------------------------------------------------------------------------------------------------------------------------------------------------------------------------------------------------|-------------------------------------------------------|-------------|--------------|
| FEZ1                | Isoform Short of Fasciculation and elongation protein zeta-1<br>gene:ENSG00000149557 /// Isoform Long of Fasciculation and elongation protein zeta-1<br>gene:ENSG00000149557 /// Homo sapiens fasciculation and elongation protein zeta 1 (zygin I), mRNA (cDNA clone MGC:10085 IMAGE:3897353), complete cds. /// Homo sapiens fasciculation and elongation protein zeta 1 (zygin I) (FEZ1), transcript variant 2, mRNA. /// Homo sapiens fasciculation and elongation protein zeta 1 (zygin I) (FEZ1), transcript variant 1, mRNA. | fasciculation and elongation protein zeta 1 (zygin I) | 0.000100679 | -1.260217091 |
| SLITRK1             | SLIT and NTRK-like protein 1<br>gene:ENSG00000178235 /// Homo sapiens SLIT and NTRK-like family, member 1, mRNA (cDNA clone MGC:51091 IMAGE:4816570), complete cds. /// Homo sapiens SLIT and NTRK-like family, member 1 (SLITRK1), mRNA.                                                                                                                                                                                                                                                                                           | SLIT and NTRK-like family, member 1                   | 0.001538595 | -1.29836266  |
| CDH4                | Cadherin-4<br>gene:ENSG00000179242 /// Homo sapiens cadherin 4, type 1, R-cadherin (retinal), mRNA (cDNA clone MGC:126700 IMAGE:8069157), complete cds. /// Homo sapiens cadherin 4, type 1, R-cadherin (retinal) (CDH4), mRNA.                                                                                                                                                                                                                                                                                                     | cadherin 4, type 1, R-cadherin (retinal)              | 0.000300329 | -1.313258303 |

|                            |                                                                                                                                                                                                                                                                                                                                                                                                                                                                                                                      |                                                                         |                   |                      |
|----------------------------|----------------------------------------------------------------------------------------------------------------------------------------------------------------------------------------------------------------------------------------------------------------------------------------------------------------------------------------------------------------------------------------------------------------------------------------------------------------------------------------------------------------------|-------------------------------------------------------------------------|-------------------|----------------------|
| LOC440258                  | My020 protein<br>gene:ENSG00000104765 /// cDNA FLJ51086, highly similar to BCL2/adenovirus E1B 19 kDa protein-interacting protein 3<br>gene:ENSG00000104765 /// Homo sapiens ovarian epithelial carcinoma-related protein mRNA, complete cds. /// Homo sapiens BCL2/adenovirus E1B 19kDa interacting protein 3-like, mRNA (cDNA clone MGC:14695 IMAGE:4134765), complete cds. /// Homo sapiens BCL2/adenovirus E1B 19kDa interacting protein 3-like (BNIP3L), mRNA.                                                  | similar to p40 /// BCL2/adenovirus E1B 19kDa interacting protein 3-like | 9.63E-06          | 1.325576<br>518      |
| ARTN                       | Isoform 1 of Artemin<br>gene:ENSG00000117407 /// Isoform 3 of Artemin gene:ENSG00000117407 /// Isoform 1 of Artemin<br>gene:ENSG00000117407 /// Homo sapiens pre-pro-neublastin mRNA, complete cds. /// Homo sapiens artemin (ARTN), transcript variant 5, mRNA. /// Homo sapiens artemin (ARTN), transcript variant 1, mRNA. /// Homo sapiens artemin (ARTN), transcript variant 4, mRNA. /// Homo sapiens artemin (ARTN), transcript variant 2, mRNA. /// Homo sapiens artemin (ARTN), transcript variant 3, mRNA. | artemin                                                                 | 0.009880<br>482   | 1.225593<br>498      |
| NTN1                       | Netrin-1 gene:ENSG00000065320 /// Human netrin-1 mRNA, complete cds. /// Homo sapiens netrin 1 (NTN1), mRNA.                                                                                                                                                                                                                                                                                                                                                                                                         | netrin 1                                                                | 6.24025E<br>-05   | -<br>1.308916<br>499 |
| <b>Functional Group 30</b> | <b>Transcript Description</b>                                                                                                                                                                                                                                                                                                                                                                                                                                                                                        | <b>Gene Title</b>                                                       | <b>Bayes.In p</b> | <b>Fold</b>          |

|        |                                                                                                                                                                                                                                                                                                                                                                                                                                                                                                                                                                                                                                                             |                                                    |             |              |
|--------|-------------------------------------------------------------------------------------------------------------------------------------------------------------------------------------------------------------------------------------------------------------------------------------------------------------------------------------------------------------------------------------------------------------------------------------------------------------------------------------------------------------------------------------------------------------------------------------------------------------------------------------------------------------|----------------------------------------------------|-------------|--------------|
| LIMA1  | LIM domain and actin binding 1 isoform a gene:ENSG00000050405 /// Isoform Beta of LIM domain and actin-binding protein 1 gene:ENSG00000050405 /// Homo sapiens LIM domain and actin binding 1, mRNA (cDNA clone MGC:131726 IMAGE:5115521), complete cds. /// Homo sapiens LIM domain and actin binding 1 (LIMA1), transcript variant b, mRNA. /// Homo sapiens LIM domain and actin binding 1 (LIMA1), transcript variant a, mRNA. /// Homo sapiens LIM domain and actin binding 1 (LIMA1), transcript variant c, mRNA.                                                                                                                                     | LIM domain and actin binding 1                     | 4.27226E-05 | -1.266518523 |
| SPTAN1 | cDNA FLJ61399, highly similar to Spectrin alpha chain, brain gene:ENSG00000197694 /// Isoform 1 of Spectrin alpha chain, brain gene:ENSG00000197694 /// Putative uncharacterized protein SPTAN1 gene:ENSG00000197694 /// Putative uncharacterized protein SPTAN1 gene:ENSG00000197694 /// Isoform 2 of Spectrin alpha chain, brain gene:ENSG00000197694 /// Homo sapiens SPTAN1 mRNA for non-erythrocytic spectrin alpha, complete cds. /// Homo sapiens spectrin, alpha, non-erythrocytic 1 (alpha-fodrin) (SPTAN1), transcript variant 2, mRNA. /// Homo sapiens spectrin, alpha, non-erythrocytic 1 (alpha-fodrin) (SPTAN1), transcript variant 1, mRNA. | spectrin, alpha, non-erythrocytic 1 (alpha-fodrin) | 0.007009349 | -1.141263648 |
| AVIL   | Advillin gene:ENSG00000135407 /// Homo sapiens advillin mRNA, complete cds. /// Homo sapiens advillin (AVIL), mRNA.                                                                                                                                                                                                                                                                                                                                                                                                                                                                                                                                         | advillin                                           | 0.083204586 | -1.253473055 |

|      |                                                                                                                                                                                                                                                                                                                                                                                                                                                                                                                                                                                                                                                                                                                                                                                                                                                                                                                                                                                                                                                                                                                                                                                                                                                                                       |                                      |            |                      |
|------|---------------------------------------------------------------------------------------------------------------------------------------------------------------------------------------------------------------------------------------------------------------------------------------------------------------------------------------------------------------------------------------------------------------------------------------------------------------------------------------------------------------------------------------------------------------------------------------------------------------------------------------------------------------------------------------------------------------------------------------------------------------------------------------------------------------------------------------------------------------------------------------------------------------------------------------------------------------------------------------------------------------------------------------------------------------------------------------------------------------------------------------------------------------------------------------------------------------------------------------------------------------------------------------|--------------------------------------|------------|----------------------|
| SCIN | Isoform 2 of Adseverin<br>gene:ENSG00000006747 /// Isoform 1 of Adseverin<br>gene:ENSG00000006747 /// Homo sapiens cDNA FLJ78088 complete cds. /// Homo sapiens scinderin (SCIN), transcript variant 2, mRNA. /// Homo sapiens scinderin (SCIN), transcript variant 1, mRNA.                                                                                                                                                                                                                                                                                                                                                                                                                                                                                                                                                                                                                                                                                                                                                                                                                                                                                                                                                                                                          | scinderin                            | 6.6255E-05 | -<br>1.709219<br>593 |
| GSN  | Isoform 2 of Gelsolin<br>gene:ENSG00000148180 /// Isoform 2 of Gelsolin gene:ENSG00000148180 /// Isoform 1 of Gelsolin<br>gene:ENSG00000148180 /// gelsolin isoform c gene:ENSG00000148180 /// cDNA FLJ35478 fis, clone SMINT2007796, highly similar to Gelsolin gene:ENSG00000148180 /// Homo sapiens gelsolin (amyloidosis, Finnish type), mRNA (cDNA clone MGC:39262 IMAGE:4661084), complete cds. /// Homo sapiens gelsolin (amyloidosis, Finnish type) (GSN), transcript variant 8, mRNA. /// Homo sapiens gelsolin (amyloidosis, Finnish type) (GSN), transcript variant 3, mRNA. /// Homo sapiens gelsolin (amyloidosis, Finnish type) (GSN), transcript variant 4, mRNA. /// Homo sapiens gelsolin (amyloidosis, Finnish type) (GSN), transcript variant 2, mRNA. /// Homo sapiens gelsolin (amyloidosis, Finnish type) (GSN), transcript variant 5, mRNA. /// Homo sapiens gelsolin (amyloidosis, Finnish type) (GSN), transcript variant 1, mRNA. /// Homo sapiens gelsolin (amyloidosis, Finnish type) (GSN), transcript variant 6, mRNA. /// Homo sapiens gelsolin (amyloidosis, Finnish type) (GSN), transcript variant 7, mRNA. | gelsolin (amyloidosis, Finnish type) | 0.00296844 | 1.229245807          |

| Functional Group 31 | Transcript Description                                                                                                                                                                                            | Gene Title                        | Bayes.In p      | Fold                 |
|---------------------|-------------------------------------------------------------------------------------------------------------------------------------------------------------------------------------------------------------------|-----------------------------------|-----------------|----------------------|
| LEFTY2              | Left-right determination factor 2<br>gene:ENSG00000143768 /// Homo sapiens left-right determination factor 2, mRNA (cDNA clone IMAGE:6140189). /// Homo sapiens left-right determination factor 2 (LEFTY2), mRNA. | left-right determination factor 2 | 0.000672<br>282 | 1.236944<br>527      |
| GDF3                | Growth/differentiation factor 3<br>gene:ENSG00000184344 /// Homo sapiens clone DNA35674 GDF3 (UNQ222) mRNA, complete cds. /// Homo sapiens growth differentiation factor 3 (GDF3), mRNA.                          | growth differentiation factor 3   | 0.001822<br>871 | -<br>1.282528<br>509 |
| GDF15               | Growth/differentiation factor 15<br>gene:ENSG00000130513 /// Homo sapiens macrophage inhibitory cytokine-1 (MIC-1) mRNA, complete cds. /// Homo sapiens growth differentiation factor 15 (GDF15), mRNA.           | growth differentiation factor 15  | 2.68327E<br>-08 | -<br>1.724689<br>975 |
| INHBE               | Inhibin beta E chain<br>gene:ENSG00000139269 /// Homo sapiens activin beta E subunit mRNA, complete cds. /// Homo sapiens inhibin, beta E (INHBE), mRNA.                                                          | inhibin, beta E                   | 0.000911<br>092 | 1.360080<br>078      |
| LEFTY1              | Left-right determination factor 1<br>gene:ENSG00000143787 /// Homo sapiens TGF-beta type secreted signaling protein LEFTYB mRNA, complete cds. /// Homo sapiens left-right determination factor 1 (LEFTY1), mRNA. | left-right determination factor 1 | 2.36431E<br>-05 | 1.379151<br>452      |

|                                |                                                                                                                                                                                                                                                                                                                                                                                                                                                                                                                                                                                           |                     |                       |                      |
|--------------------------------|-------------------------------------------------------------------------------------------------------------------------------------------------------------------------------------------------------------------------------------------------------------------------------------------------------------------------------------------------------------------------------------------------------------------------------------------------------------------------------------------------------------------------------------------------------------------------------------------|---------------------|-----------------------|----------------------|
| IL24                           | Interleukin 24<br>gene:ENSG00000162892 ///<br>Interleukin-24<br>gene:ENSG00000162892 /// IL-24<br>splice variant delE5<br>gene:ENSG00000162892 ///<br>interleukin 24 isoform 2<br>gene:ENSG00000162892 ///<br>Melanocyte-associated Mda-7 splice<br>variant gene:ENSG00000162892 ///<br>interleukin 24 isoform 2<br>gene:ENSG00000162892 /// Homo<br>sapiens IL-24 splice variant delE5<br>mRNA, complete cds, alternatively<br>spliced. /// Homo sapiens interleukin<br>24 (IL24), transcript variant 1, mRNA.<br>/// Homo sapiens interleukin 24<br>(IL24), transcript variant 2, mRNA. | interleukin 24      | 0.000865<br>021       | -<br>1.370995<br>239 |
| TFF1                           | Trefoil factor 1<br>gene:ENSG00000160182 /// Human<br>pS2 mRNA induced by estrogen from<br>human breast cancer cell line MCF-7.<br>/// Homo sapiens trefoil factor 1<br>(TFF1), mRNA.                                                                                                                                                                                                                                                                                                                                                                                                     | trefoil factor 1    | 0.000525<br>437       | 1.379149<br>944      |
| <b>Functional<br/>Group 32</b> | <b>Transcript Description</b>                                                                                                                                                                                                                                                                                                                                                                                                                                                                                                                                                             | <b>Gene Title</b>   | <b>Bayes.In<br/>p</b> | <b>Fold</b>          |
| EXOSC5                         | Exosome complex exonuclease RRP46<br>gene:ENSG00000077348 /// Homo<br>sapiens chronic myelogenous<br>leukemia tumor antigen 28 mRNA,<br>complete cds. /// Homo sapiens<br>exosome component 5 (EXOSC5),<br>mRNA.                                                                                                                                                                                                                                                                                                                                                                          | exosome component 5 | 0.001652<br>72        | 1.181146<br>779      |



|         |                                                                                                                                                                                                                                                                                                                                                                                                                                                                                                                                                                                                                 |                                                                           |                 |                      |
|---------|-----------------------------------------------------------------------------------------------------------------------------------------------------------------------------------------------------------------------------------------------------------------------------------------------------------------------------------------------------------------------------------------------------------------------------------------------------------------------------------------------------------------------------------------------------------------------------------------------------------------|---------------------------------------------------------------------------|-----------------|----------------------|
| EXOSC3  | Isoform 2 of SH2 domain-containing adapter protein B<br>gene:ENSG00000107338 /// exosome component 3 isoform 2<br>gene:ENSG00000107371 /// Exosome complex exonuclease RRP40<br>gene:ENSG00000107371 /// Homo sapiens cDNA FLJ75926 complete cds, highly similar to Homo sapiens exosome component 3 (EXOSC3), transcript variant 1, mRNA. /// Homo sapiens exosome component 3 (EXOSC3), transcript variant 1, mRNA. /// Homo sapiens exosome component 3 (EXOSC3), transcript variant 2, mRNA.                                                                                                                | exosome component 3                                                       | 0.003910<br>206 | 1.190876<br>11       |
| ALS2CR8 | Isoform 1 of Amyotrophic lateral sclerosis 2 chromosomal region candidate gene 8 protein<br>gene:ENSG00000138380 /// Isoform 1 of Amyotrophic lateral sclerosis 2 chromosomal region candidate gene 8 protein gene:ENSG00000138380 /// Homo sapiens amyotrophic lateral sclerosis 2 (juvenile) chromosome region, candidate 8, mRNA (cDNA clone MGC:44837 IMAGE:4521845), complete cds. /// Homo sapiens amyotrophic lateral sclerosis 2 (juvenile) chromosome region, candidate 8 (ALS2CR8), mRNA. /// Homo sapiens amyotrophic lateral sclerosis 2 (juvenile) chromosome region, candidate 8 (ALS2CR8), mRNA. | amyotrophic lateral sclerosis 2 (juvenile) chromosome region, candidate 8 | 0.005081<br>142 | 1.390537<br>787      |
| E2F7    | Isoform 1 of Transcription factor E2F7<br>gene:ENSG00000165891 /// Putative uncharacterized protein E2F7<br>gene:ENSG00000165891 /// Homo sapiens E2F transcription factor 7, mRNA (cDNA clone MGC:167976 IMAGE:9020353), complete cds. /// Homo sapiens E2F transcription factor 7 (E2F7), mRNA.                                                                                                                                                                                                                                                                                                               | E2F transcription factor 7                                                | 1.68088E<br>-05 | -<br>1.315656<br>104 |

|                            |                                                                                                                                                                                                                                                                                                                                                                                                                                                                   |                                         |                   |                      |
|----------------------------|-------------------------------------------------------------------------------------------------------------------------------------------------------------------------------------------------------------------------------------------------------------------------------------------------------------------------------------------------------------------------------------------------------------------------------------------------------------------|-----------------------------------------|-------------------|----------------------|
| POLR1E                     | Isoform 2 of DNA-directed RNA polymerase I subunit RPA49<br>gene:ENSG00000137054 /// Isoform 1 of DNA-directed RNA polymerase I subunit RPA49<br>gene:ENSG00000137054 /// Homo sapiens polymerase (RNA) I polypeptide E, 53kDa, mRNA (cDNA clone MGC:5609 IMAGE:3461710), complete cds. /// Homo sapiens polymerase (RNA) I polypeptide E, 53kDa (POLR1E), mRNA.                                                                                                  | polymerase (RNA) I polypeptide E, 53kDa | 0.005571<br>166   | 1.163774<br>111      |
| BXDC5                      | 14 kDa protein<br>gene:ENSG00000117133 /// Ribosome production factor 1<br>gene:ENSG00000117133 /// Homo sapiens brix domain containing 5, mRNA (cDNA clone MGC:22954 IMAGE:4853072), complete cds. /// Homo sapiens brix domain containing 5 (BXDC5), mRNA.                                                                                                                                                                                                      | brix domain containing 5                | 0.002256<br>161   | 1.198776<br>352      |
| RCL1                       | RNA 3'-terminal phosphate cyclase-like protein<br>gene:ENSG00000120158 /// RNA terminal phosphate cyclase-like 1<br>gene:ENSG00000120158 /// RNA terminal phosphate cyclase-like 1<br>gene:ENSG00000120158 /// RNA terminal phosphate cyclase-like 1<br>gene:ENSG00000120158 /// Homo sapiens RNA terminal phosphate cyclase-like 1, mRNA (cDNA clone MGC:1390 IMAGE:3343468), complete cds. /// Homo sapiens RNA terminal phosphate cyclase-like 1 (RCL1), mRNA. | RNA terminal phosphate cyclase-like 1   | 0.008619<br>101   | -<br>1.149772<br>905 |
| RPS19BP1                   | 40S ribosomal protein S19-binding protein 1<br>gene:ENSG00000187051 /// Homo sapiens ribosomal protein S19 binding protein 1, mRNA (cDNA clone MGC:45448 IMAGE:5399759), complete cds. /// Homo sapiens ribosomal protein S19 binding protein 1 (RPS19BP1), mRNA.                                                                                                                                                                                                 | ribosomal protein S19 binding protein 1 | 0.006797<br>16    | 1.161800<br>38       |
| <b>Functional Group 33</b> | <b>Transcript Description</b>                                                                                                                                                                                                                                                                                                                                                                                                                                     | <b>Gene Title</b>                       | <b>Bayes.In p</b> | <b>Fold</b>          |

|        |                                                                                                                                                                                                                                                                                                                                                                                                                                                                                                                                                                                                         |                                                         |                 |                      |
|--------|---------------------------------------------------------------------------------------------------------------------------------------------------------------------------------------------------------------------------------------------------------------------------------------------------------------------------------------------------------------------------------------------------------------------------------------------------------------------------------------------------------------------------------------------------------------------------------------------------------|---------------------------------------------------------|-----------------|----------------------|
| DAPP1  | Isoform 1 of Dual adapter for phosphotyrosine and 3-phosphotyrosine and 3-phosphoinositide<br>gene:ENSG00000070190 /// Homo sapiens B lymphocyte adapter protein BAM32 (BAM32) mRNA, complete cds. /// Homo sapiens dual adaptor of phosphotyrosine and 3-phosphoinositides (DAPP1), mRNA.                                                                                                                                                                                                                                                                                                              | dual adaptor of phosphotyrosine and 3-phosphoinositides | 0.002380<br>348 | -<br>1.448934<br>867 |
| CDC25C | Isoform 5 of M-phase inducer phosphatase 3<br>gene:ENSG00000158402 /// Isoform 4 of M-phase inducer phosphatase 3<br>gene:ENSG00000158402 /// Isoform 2 of M-phase inducer phosphatase 3<br>gene:ENSG00000158402 /// M-phase inducer phosphatase 3<br>gene:ENSG00000158402 /// Homo sapiens cDNA FLJ40391 fis, clone TESTI2036833, highly similar to M-PHASE INDUCER PHOSPHATASE 3 (EC 3.1.3.48). /// Homo sapiens cell division cycle 25 homolog C (S. pombe) (CDC25C), transcript variant 1, mRNA. /// Homo sapiens cell division cycle 25 homolog C (S. pombe) (CDC25C), transcript variant 2, mRNA. | cell division cycle 25 homolog C (S. pombe)             | 0.001950<br>188 | 1.213706<br>473      |
| PTPRM  | Receptor-type tyrosine-protein phosphatase mu<br>gene:ENSG00000173482 /// PTPRM protein gene:ENSG00000173482 /// cDNA FLJ55898, highly similar to Receptor-type tyrosine-protein phosphatase mu<br>gene:ENSG00000173482 /// Homo sapiens protein tyrosine phosphatase, receptor type, M, mRNA (cDNA clone MGC:166994 IMAGE:8860327), complete cds. /// Homo sapiens protein tyrosine phosphatase, receptor type, M (PTPRM), transcript variant 2, mRNA. /// Homo sapiens protein tyrosine phosphatase, receptor type, M (PTPRM), transcript variant 1, mRNA.                                            | protein tyrosine phosphatase, receptor type, M          | 0.001477<br>125 | -<br>1.226370<br>184 |

|        |                                                                                                                                                                                                                                                                                                                                                                              |                                                           |                 |                      |
|--------|------------------------------------------------------------------------------------------------------------------------------------------------------------------------------------------------------------------------------------------------------------------------------------------------------------------------------------------------------------------------------|-----------------------------------------------------------|-----------------|----------------------|
| DUSP14 | Dual specificity protein phosphatase 14 gene:ENSG00000161326 /// Dual specificity protein phosphatase 14 gene:ENSG00000161326 /// Dual specificity protein phosphatase 14 gene:ENSG00000161326 /// Homo sapiens dual specificity phosphatase 14, mRNA (cDNA clone MGC:1861 IMAGE:3533971), complete cds. /// Homo sapiens dual specificity phosphatase 14 (DUSP14), mRNA.    | dual specificity phosphatase 14                           | 0.001267<br>682 | -<br>1.242660<br>659 |
| PTPRH  | Isoform 1 of Receptor-type tyrosine-protein phosphatase H gene:ENSG00000080031 /// Isoform 2 of Receptor-type tyrosine-protein phosphatase H gene:ENSG00000080031 /// Homo sapiens SAP-1 mRNA for protein tyrosine phosphatase precursor, complete cds. /// Homo sapiens protein tyrosine phosphatase, receptor type, H (PTPRH), mRNA.                                       | protein tyrosine phosphatase, receptor type, H            | 0.005780<br>601 | -<br>1.271831<br>79  |
| PPM1D  | Protein phosphatase 1D gene:ENSG00000170836 /// Protein phosphatase 1D magnesium-dependent, delta isoform, isoform CRA_b gene:ENSG00000170836 /// Homo sapiens protein phosphatase 1D magnesium-dependent, delta isoform, mRNA (cDNA clone MGC:35090 IMAGE:5167004), complete cds. /// Homo sapiens protein phosphatase 1D magnesium-dependent, delta isoform (PPM1D), mRNA. | protein phosphatase 1D magnesium-dependent, delta isoform | 0.000103<br>361 | -<br>1.270424<br>375 |

|       |                                                                                                                                                                                                                                                                                                                                                                                                                                                                                                                |                                                |             |              |
|-------|----------------------------------------------------------------------------------------------------------------------------------------------------------------------------------------------------------------------------------------------------------------------------------------------------------------------------------------------------------------------------------------------------------------------------------------------------------------------------------------------------------------|------------------------------------------------|-------------|--------------|
| PTPRE | Receptor-type tyrosine-protein phosphatase epsilon precursor gene:ENSG00000132334 /// Isoform 2 of Receptor-type tyrosine-protein phosphatase epsilon gene:ENSG00000132334 /// Homo sapiens protein tyrosine phosphatase, receptor type, E, mRNA (cDNA clone MGC:48280 IMAGE:5274802), complete cds. /// Homo sapiens protein tyrosine phosphatase, receptor type, E (PTPRE), transcript variant 2, mRNA. /// Homo sapiens protein tyrosine phosphatase, receptor type, E (PTPRE), transcript variant 1, mRNA. | protein tyrosine phosphatase, receptor type, E | 3.81593E-06 | -1.667249907 |
| DUSP4 | dual specificity phosphatase 4 isoform 2 gene:ENSG00000120875 /// dual specificity phosphatase 4 isoform 2 gene:ENSG00000120875 /// Dual specificity protein phosphatase 4 gene:ENSG00000120875 /// Human dual specific protein phosphatase mRNA, complete cds. /// Homo sapiens dual specificity phosphatase 4 (DUSP4), transcript variant 2, mRNA. /// Homo sapiens dual specificity phosphatase 4 (DUSP4), transcript variant 1, mRNA.                                                                      | dual specificity phosphatase 4                 | 0.002213935 | -1.315308582 |
| PDP2  | [Pyruvate dehydrogenase [acetyl-transferring]-phosphatase 2, mitochondrial gene:ENSG00000172840 /// Homo sapiens pyruvate dehydrogenase phosphatase isoenzyme 2, mRNA (cDNA clone MGC:40210 IMAGE:5241881), complete cds. /// Homo sapiens pyruvate dehydrogenase phosphatase isoenzyme 2 (PDP2), mRNA.                                                                                                                                                                                                        | pyruvate dehydrogenase phosphatase isoenzyme 2 | 0.000963476 | 1.405566356  |

|       |                                                                                                                                                                                                                                                                                                                                                                                                                                                                                                                                                                                                                                                                                                                                                                                                                                                                                      |                                                |             |              |
|-------|--------------------------------------------------------------------------------------------------------------------------------------------------------------------------------------------------------------------------------------------------------------------------------------------------------------------------------------------------------------------------------------------------------------------------------------------------------------------------------------------------------------------------------------------------------------------------------------------------------------------------------------------------------------------------------------------------------------------------------------------------------------------------------------------------------------------------------------------------------------------------------------|------------------------------------------------|-------------|--------------|
| DUSP1 | Dual specificity protein phosphatase 1<br>gene:ENSG00000120129 /// Homo sapiens dual specificity phosphatase 1, mRNA (cDNA clone MGC:26153 IMAGE:4794895), complete cds. /// Homo sapiens dual specificity phosphatase 1 (DUSP1), mRNA.                                                                                                                                                                                                                                                                                                                                                                                                                                                                                                                                                                                                                                              | dual specificity phosphatase 1                 | 2.09169E-07 | -1.624462873 |
| PTPRU | Receptor-type tyrosine-protein phosphatase U<br>gene:ENSG00000060656 /// protein tyrosine phosphatase, receptor type, U isoform 2 precursor<br>gene:ENSG00000060656 /// protein tyrosine phosphatase, receptor type, U isoform 3 precursor<br>gene:ENSG00000060656 /// cDNA FLJ37530 fis, clone BRCAN2012713, highly similar to Receptor-type tyrosine-protein phosphatase U<br>gene:ENSG00000060656 /// FMI protein gene:ENSG00000060656 /// Homo sapiens protein tyrosine phosphatase, receptor type, U, mRNA (cDNA clone MGC:164848 IMAGE:40147934), complete cds. /// Homo sapiens protein tyrosine phosphatase, receptor type, U (PTPRU), transcript variant 3, mRNA. /// Homo sapiens protein tyrosine phosphatase, receptor type, U (PTPRU), transcript variant 2, mRNA. /// Homo sapiens protein tyrosine phosphatase, receptor type, U (PTPRU), transcript variant 1, mRNA. | protein tyrosine phosphatase, receptor type, U | 0.004666787 | -1.191944005 |
| STYX  | Serine/threonine/tyrosine-interacting protein gene:ENSG00000198252 /// Homo sapiens serine/threonine/tyrosine interacting protein, mRNA (cDNA clone MGC:9489 IMAGE:3922829), complete cds. /// Homo sapiens serine/threonine/tyrosine interacting protein (STYX), transcript variant 1, mRNA. /// Homo sapiens serine/threonine/tyrosine interacting protein (STYX), transcript variant 2, mRNA.                                                                                                                                                                                                                                                                                                                                                                                                                                                                                     | serine/threonine/tyrosine interacting protein  | 4.07395E-05 | 1.288356906  |

|                            |                                                                                                                                                                                                                                                                                                                                                                                                                                                                                                                                                                                                                                                                                                                                                    |                                 |                   |              |
|----------------------------|----------------------------------------------------------------------------------------------------------------------------------------------------------------------------------------------------------------------------------------------------------------------------------------------------------------------------------------------------------------------------------------------------------------------------------------------------------------------------------------------------------------------------------------------------------------------------------------------------------------------------------------------------------------------------------------------------------------------------------------------------|---------------------------------|-------------------|--------------|
| DUSP6                      | Isoform 1 of Dual specificity protein phosphatase 6<br>gene:ENSG00000139318 /// Isoform 2 of Dual specificity protein phosphatase 6<br>gene:ENSG00000139318 /// Homo sapiens dual specificity phosphatase 6, mRNA (cDNA clone MGC:12852 IMAGE:3954486), complete cds. /// Homo sapiens dual specificity phosphatase 6 (DUSP6), transcript variant 1, mRNA. /// Homo sapiens dual specificity phosphatase 6 (DUSP6), transcript variant 2, mRNA.                                                                                                                                                                                                                                                                                                    | dual specificity phosphatase 6  | 5.9845E-05        | 1.282981939  |
| DUSP10                     | Dual specificity protein phosphatase 10 gene:ENSG00000143507 /// cDNA FLJ52863, highly similar to Dual specificity protein phosphatase 10 gene:ENSG00000143507 /// cDNA FLJ52863, highly similar to Dual specificity protein phosphatase 10 gene:ENSG00000143507 /// cDNA FLJ52863, highly similar to Dual specificity protein phosphatase 10 gene:ENSG00000143507 /// Homo sapiens dual specificity phosphatase 10, mRNA (cDNA clone MGC:35356 IMAGE:5182027), complete cds. /// Homo sapiens dual specificity phosphatase 10 (DUSP10), transcript variant 1, mRNA. /// Homo sapiens dual specificity phosphatase 10 (DUSP10), transcript variant 2, mRNA. /// Homo sapiens dual specificity phosphatase 10 (DUSP10), transcript variant 3, mRNA. | dual specificity phosphatase 10 | 0.004632555       | -1.210585825 |
| <b>Functional Group 34</b> | <b>Transcript Description</b>                                                                                                                                                                                                                                                                                                                                                                                                                                                                                                                                                                                                                                                                                                                      | <b>Gene Title</b>               | <b>Bayes.In p</b> | <b>Fold</b>  |

|       |                                                                                                                                                                                                                                                                                                                                                                                                                                                                                                           |                                                            |             |                  |
|-------|-----------------------------------------------------------------------------------------------------------------------------------------------------------------------------------------------------------------------------------------------------------------------------------------------------------------------------------------------------------------------------------------------------------------------------------------------------------------------------------------------------------|------------------------------------------------------------|-------------|------------------|
| ACE2  | Isoform 1 of Angiotensin-converting enzyme 2 gene:ENSG00000130234<br>/// Homo sapiens ace2 mRNA for angiotensin-converting enzyme 2, complete cds, tissue_type: testis. /// Homo sapiens angiotensin I converting enzyme (peptidyl-dipeptidase A) 2 (ACE2), mRNA.                                                                                                                                                                                                                                         | angiotensin I converting enzyme (peptidyl-dipeptidase A) 2 | 0.000106005 | 1.520959887      |
| MME   | Neprilysin gene:ENSG00000196549<br>/// Neprilysin gene:ENSG00000196549 /// Human common acute lymphoblastic leukemia antigen (CALLA) mRNA, complete cds. /// Homo sapiens membrane metallo-endopeptidase (MME), transcript variant 1, mRNA. /// Homo sapiens membrane metallo-endopeptidase (MME), transcript variant 1bis, mRNA. /// Homo sapiens membrane metallo-endopeptidase (MME), transcript variant 2a, mRNA. /// Homo sapiens membrane metallo-endopeptidase (MME), transcript variant 2b, mRNA. | membrane metallo-endopeptidase                             | 0.004025551 | -<br>1.204458409 |
| CPXM2 | CPXM2 protein gene:ENSG00000121898 /// Carboxypeptidase-like protein X2 gene:ENSG00000121898 /// Homo sapiens clone DNA47394 carboxypeptidase Hlo (UNQ676) mRNA, complete cds. /// Homo sapiens carboxypeptidase X (M14 family), member 2 (CPXM2), mRNA.                                                                                                                                                                                                                                                  | carboxypeptidase X (M14 family), member 2                  | 0.001282355 | -<br>1.266147419 |
| CPA4  | Carboxypeptidase A4 gene:ENSG00000128510 /// Homo sapiens carboxypeptidase A4, mRNA (cDNA clone MGC:59749 IMAGE:6106874), complete cds. /// Homo sapiens carboxypeptidase A4 (CPA4), mRNA.                                                                                                                                                                                                                                                                                                                | carboxypeptidase A4                                        | 0.004630384 | -<br>1.331906934 |



|         |                                                                                                                                                                                                                                                                                                                                                                                                                                                         |                                                                     |                 |                      |
|---------|---------------------------------------------------------------------------------------------------------------------------------------------------------------------------------------------------------------------------------------------------------------------------------------------------------------------------------------------------------------------------------------------------------------------------------------------------------|---------------------------------------------------------------------|-----------------|----------------------|
| CPE     | Carboxypeptidase E precursor<br>gene:ENSG00000109472 ///<br>Carboxypeptidase E precursor<br>gene:ENSG00000109472 /// Homo<br>sapiens carboxypeptidase E, mRNA<br>(cDNA clone MGC:45357<br>IMAGE:5182962), complete cds. ///<br>Homo sapiens carboxypeptidase E<br>(CPE), mRNA.                                                                                                                                                                          | carboxypeptidase E                                                  | 0.000154<br>258 | -<br>1.321171<br>932 |
| CPN1    | Carboxypeptidase N catalytic chain<br>gene:ENSG00000120054 /// Homo<br>sapiens carboxypeptidase N,<br>polypeptide 1, mRNA (cDNA clone<br>MGC:34611 IMAGE:5227795),<br>complete cds. /// Homo sapiens<br>carboxypeptidase N, polypeptide 1<br>(CPN1), mRNA.                                                                                                                                                                                              | carboxypeptidase N,<br>polypeptide 1                                | 0.000944<br>897 | 1.555618<br>434      |
| MMP14   | matrix metalloproteinase 14<br>preproprotein<br>gene:ENSG00000157227 /// Homo<br>sapiens matrix metalloproteinase 14<br>(membrane-inserted), mRNA (cDNA<br>clone MGC:64960 IMAGE:6046773),<br>complete cds. /// Homo sapiens<br>matrix metalloproteinase 14<br>(membrane-inserted) (MMP14),<br>mRNA.                                                                                                                                                    | matrix<br>metalloproteinase 14<br>(membrane-inserted)               | 0.000150<br>151 | -<br>1.237941<br>375 |
| ADAMTS1 | A disintegrin and metalloproteinase<br>with thrombospondin motifs 1<br>gene:ENSG00000154734 /// cDNA<br>FLJ26363 fis, clone HRT05360, highly<br>similar to ADAM-TS 1<br>gene:ENSG00000154734 /// Homo<br>sapiens ADAM metalloproteinase with<br>thrombospondin type 1 motif, 1,<br>mRNA (cDNA clone MGC:32979<br>IMAGE:5266513), complete cds. ///<br>Homo sapiens ADAM<br>metalloproteinase with<br>thrombospondin type 1 motif, 1<br>(ADAMTS1), mRNA. | ADAM<br>metalloproteinase with<br>thrombospondin type<br>1 motif, 1 | 0.004789<br>118 | -<br>1.220346<br>099 |
| MMP1    | Interstitial collagenase<br>gene:ENSG00000196611 /// Human<br>skin collagenase mRNA, complete cds.<br>/// Homo sapiens matrix<br>metalloproteinase 1 (interstitial<br>collagenase) (MMP1), mRNA.                                                                                                                                                                                                                                                        | matrix<br>metalloproteinase 1<br>(interstitial<br>collagenase)      | 0.008062<br>361 | -<br>1.335119<br>543 |

|         |                                                                                                                                                                                                                                                                                                                                                                                                                         |                                                            |             |                  |
|---------|-------------------------------------------------------------------------------------------------------------------------------------------------------------------------------------------------------------------------------------------------------------------------------------------------------------------------------------------------------------------------------------------------------------------------|------------------------------------------------------------|-------------|------------------|
| ADAMTS9 | Isoform 1 of A disintegrin and metalloproteinase with thrombospondin motifs 9<br>gene:ENSG00000163638 /// Homo sapiens ADAM metalloproteinase with thrombospondin type 1 motif, 9, mRNA (cDNA clone MGC:163450 IMAGE:40146609), complete cds. /// Homo sapiens ADAM metalloproteinase with thrombospondin type 1 motif, 9 (ADAMTS9), mRNA.                                                                              | ADAM metalloproteinase with thrombospondin type 1 motif, 9 | 0.004115811 | 1.24865612       |
| MMP10   | Stromelysin-2<br>gene:ENSG00000166670 /// Homo sapiens mRNA for matrix metalloproteinase 10 preproprotein variant, clone: CAS05488. /// Homo sapiens matrix metalloproteinase 10 (stromelysin 2) (MMP10), mRNA.                                                                                                                                                                                                         | matrix metalloproteinase 10 (stromelysin 2)                | 0.009815876 | -<br>1.361133759 |
| ADAM12  | Isoform 1 of ADAM 12<br>gene:ENSG00000148848 /// Isoform 4 of ADAM 12<br>gene:ENSG00000148848 /// Isoform 2 of ADAM 12<br>gene:ENSG00000148848 /// Homo sapiens meltrin-L precursor (ADAM12) mRNA, complete cds, alternatively spliced. /// Homo sapiens ADAM metalloproteinase domain 12 (ADAM12), transcript variant 1, mRNA. /// Homo sapiens ADAM metalloproteinase domain 12 (ADAM12), transcript variant 2, mRNA. | ADAM metalloproteinase domain 12                           | 1.3884E-07  | -<br>1.822030214 |

|          |                                                                                                                                                                                                                                                                                                                                                                                                                                                                                                            |                                                                                        |                 |                      |
|----------|------------------------------------------------------------------------------------------------------------------------------------------------------------------------------------------------------------------------------------------------------------------------------------------------------------------------------------------------------------------------------------------------------------------------------------------------------------------------------------------------------------|----------------------------------------------------------------------------------------|-----------------|----------------------|
| MMP2     | 72 kDa type IV collagenase<br>gene:ENSG0000087245 /// Homo sapiens matrix metalloproteinase 2 (gelatinase A, 72kDa gelatinase, 72kDa type IV collagenase), mRNA (cDNA clone MGC:2313 IMAGE:3161383), complete cds. /// Homo sapiens matrix metalloproteinase 2 (gelatinase A, 72kDa gelatinase, 72kDa type IV collagenase) (MMP2), transcript variant 1, mRNA. /// Homo sapiens matrix metalloproteinase 2 (gelatinase A, 72kDa gelatinase, 72kDa type IV collagenase) (MMP2), transcript variant 2, mRNA. | matrix metalloproteinase 2 (gelatinase A, 72kDa gelatinase, 72kDa type IV collagenase) | 0.000312<br>145 | -<br>1.235343<br>531 |
| ADAMTS16 | Isoform 1 of A disintegrin and metalloproteinase with thrombospondin motifs 16<br>gene:ENSG00000145536 /// Homo sapiens ADAMTS16s alternative splice form mRNA, complete cds. /// Homo sapiens ADAM metalloproteinase with thrombospondin type 1 motif, 16 (ADAMTS16), mRNA.                                                                                                                                                                                                                               | ADAM metalloproteinase with thrombospondin type 1 motif, 16                            | 2.90552E<br>-05 | -<br>1.372515<br>565 |
| OSGEPL1  | Isoform 3 of Probable O-sialoglycoprotein endopeptidase 2<br>gene:ENSG00000128694 /// Homo sapiens O-sialoglycoprotein endopeptidase-like 1, mRNA (cDNA clone MGC:20293 IMAGE:4121450), complete cds. /// Homo sapiens O-sialoglycoprotein endopeptidase-like 1 (OSGEPL1), mRNA.                                                                                                                                                                                                                           | O-sialoglycoprotein endopeptidase-like 1                                               | 0.007468<br>574 | 1.235325<br>034      |
| PAPPA2   | Isoform 1 of Pappalysin-2<br>gene:ENSG00000116183 /// Isoform 2 of Pappalysin-2<br>gene:ENSG00000116183 /// Homo sapiens cDNA clone IMAGE:40147673. /// Homo sapiens pappalysin 2 (PAPPA2), transcript variant 2, mRNA. /// Homo sapiens pappalysin 2 (PAPPA2), transcript variant 1, mRNA.                                                                                                                                                                                                                | pappalysin 2                                                                           | 0.009715<br>835 | -<br>1.246859<br>297 |
| OVCH2    | Ovochymase-2<br>gene:ENSG00000183378 /// Homo sapiens ovochymase 2 (OVCH2), mRNA.                                                                                                                                                                                                                                                                                                                                                                                                                          | ovochymase 2                                                                           | 0.000527<br>571 | -<br>1.427335<br>294 |

|                                |                                                                                                                                                                                                                                                                                                                                                                                                                                                                                                                                                                                                                                                                                                                                                                                                                                                                                                                                                                                                                                                                                                                                                                                                                                                                                  |                                                |                       |                      |
|--------------------------------|----------------------------------------------------------------------------------------------------------------------------------------------------------------------------------------------------------------------------------------------------------------------------------------------------------------------------------------------------------------------------------------------------------------------------------------------------------------------------------------------------------------------------------------------------------------------------------------------------------------------------------------------------------------------------------------------------------------------------------------------------------------------------------------------------------------------------------------------------------------------------------------------------------------------------------------------------------------------------------------------------------------------------------------------------------------------------------------------------------------------------------------------------------------------------------------------------------------------------------------------------------------------------------|------------------------------------------------|-----------------------|----------------------|
| RNF43                          | RING finger protein 43<br>gene:ENSG00000108375 /// RING<br>finger protein 43<br>gene:ENSG00000108375 /// Homo<br>sapiens cDNA FLJ77466 complete cds.<br>/// Homo sapiens ring finger protein<br>43 (RNF43), mRNA.                                                                                                                                                                                                                                                                                                                                                                                                                                                                                                                                                                                                                                                                                                                                                                                                                                                                                                                                                                                                                                                                | ring finger protein 43                         | 0.000262<br>242       | -<br>1.403402<br>441 |
| <b>Functional<br/>Group 35</b> | <b>Transcript Description</b>                                                                                                                                                                                                                                                                                                                                                                                                                                                                                                                                                                                                                                                                                                                                                                                                                                                                                                                                                                                                                                                                                                                                                                                                                                                    | <b>Gene Title</b>                              | <b>Bayes.In<br/>p</b> | <b>Fold</b>          |
| MDM2                           | Isoform Mdm2 of E3 ubiquitin-protein<br>ligase Mdm2 gene:ENSG00000135679<br>/// Putative uncharacterized protein<br>MDM2 gene:ENSG00000135679 ///<br>Isoform Mdm2-C of E3 ubiquitin-<br>protein ligase Mdm2<br>gene:ENSG00000135679 /// Isoform<br>Mdm2-G of E3 ubiquitin-protein<br>ligase Mdm2 gene:ENSG00000135679<br>/// Isoform Mdm2-A of E3 ubiquitin-<br>protein ligase Mdm2<br>gene:ENSG00000135679 /// Isoform<br>Mdm2-A1 of E3 ubiquitin-protein<br>ligase Mdm2 gene:ENSG00000135679<br>/// p53-binding protein<br>gene:ENSG00000135679 /// mouse<br>double minute 2 homolog isoform<br>MDM2 gene:ENSG00000135679 ///<br>MDM2 variant FB29<br>gene:ENSG00000135679 /// mouse<br>double minute 2 homolog isoform<br>MDM2a gene:ENSG00000135679 ///<br>Putative uncharacterized protein<br>MDM2 gene:ENSG00000135679 ///<br>Isoform Mdm2-G of E3 ubiquitin-<br>protein ligase Mdm2<br>gene:ENSG00000135679 /// Isoform<br>Mdm2-C of E3 ubiquitin-protein ligase<br>Mdm2 gene:ENSG00000135679 ///<br>p53-binding protein<br>gene:ENSG00000135679 /// Isoform<br>Mdm2-A of E3 ubiquitin-protein<br>ligase Mdm2 gene:ENSG00000135679<br>/// Isoform Mdm2-A1 of E3 ubiquitin-<br>protein ligase Mdm2<br>gene:ENSG00000135679 /// Homo<br>sapiens cDNA FLJ75260 complete cds, | Mdm2 p53 binding<br>protein homolog<br>(mouse) | 1.59086E<br>-06       | -<br>1.340333<br>826 |

|      |                                                                                                                                                                                                                                                                                                                                                                                                                                                                                                                                                                           |                            |             |              |
|------|---------------------------------------------------------------------------------------------------------------------------------------------------------------------------------------------------------------------------------------------------------------------------------------------------------------------------------------------------------------------------------------------------------------------------------------------------------------------------------------------------------------------------------------------------------------------------|----------------------------|-------------|--------------|
|      | <p>highly similar to H.sapiens mRNA for p53-associated gene. /// Homo sapiens Mdm2 p53 binding protein homolog (mouse) (MDM2), transcript variant MDM2, mRNA. /// Homo sapiens Mdm2 p53 binding protein homolog (mouse) (MDM2), transcript variant MDM2a, mRNA. /// Homo sapiens Mdm2 p53 binding protein homolog (mouse) (MDM2), transcript variant MDM2e, mRNA. /// Homo sapiens Mdm2 p53 binding protein homolog (mouse) (MDM2), transcript variant MDM2b, mRNA. /// Homo sapiens Mdm2 p53 binding protein homolog (mouse) (MDM2), transcript variant MDM2d, mRNA.</p> |                            |             |              |
| LNX1 | <p>Isoform 2 of E3 ubiquitin-protein ligase LNX gene:ENSG00000072201<br/> /// Isoform 1 of E3 ubiquitin-protein ligase LNX gene:ENSG00000072201<br/> /// Isoform 1 of E3 ubiquitin-protein ligase LNX gene:ENSG00000072201<br/> /// Homo sapiens multi-PDZ-domain-containing protein mRNA, complete cds. /// Homo sapiens ligand of numb-protein X 1 (LNx1), transcript variant 1, mRNA. /// Homo sapiens ligand of numb-protein X 1 (LNx1), transcript variant 2, mRNA.</p>                                                                                              | ligand of numb-protein X 1 | 0.001422811 | -1.346032277 |

|         |                                                                                                                                                                                                                                                                                                                                                                                                                                                                                                                                                                                                                                                                                                                                                                                                                                                                                                                                                                                                                                                                                                                                  |                                           |                 |                 |
|---------|----------------------------------------------------------------------------------------------------------------------------------------------------------------------------------------------------------------------------------------------------------------------------------------------------------------------------------------------------------------------------------------------------------------------------------------------------------------------------------------------------------------------------------------------------------------------------------------------------------------------------------------------------------------------------------------------------------------------------------------------------------------------------------------------------------------------------------------------------------------------------------------------------------------------------------------------------------------------------------------------------------------------------------------------------------------------------------------------------------------------------------|-------------------------------------------|-----------------|-----------------|
| ASB13   | <p>Putative uncharacterized protein ASB13 gene:ENSG00000196372 /// Isoform 1 of Ankyrin repeat and SOCS box protein 13 gene:ENSG00000196372 /// Isoform 2 of Ankyrin repeat and SOCS box protein 13 gene:ENSG00000196372 /// Homo sapiens ankyrin repeat and SOCS box-containing 13, mRNA (cDNA clone MGC:19879 IMAGE:4552643), complete cds. /// Homo sapiens ankyrin repeat and SOCS box-containing 13 (ASB13), mRNA.</p>                                                                                                                                                                                                                                                                                                                                                                                                                                                                                                                                                                                                                                                                                                      | ankyrin repeat and SOCS box-containing 13 | 0.001693<br>865 | 1.297897<br>898 |
| ANAPC11 | <p>cdna:known supercontig::NT_113944:146301:154840:1 gene:ENSG00000215639 /// Isoform 2 of Anaphase-promoting complex subunit 11 gene:ENSG00000141552 /// Isoform 1 of Anaphase-promoting complex subunit 11 gene:ENSG00000141552 /// Isoform 1 of Anaphase-promoting complex subunit 11 gene:ENSG00000141552 /// Isoform 1 of Anaphase-promoting complex subunit 11 gene:ENSG00000141552 /// Homo sapiens APC11 anaphase promoting complex subunit 11, mRNA (cDNA clone MGC:882 IMAGE:3346039), complete cds. /// Homo sapiens anaphase promoting complex subunit 11 (ANAPC11), transcript variant 2, mRNA. /// Homo sapiens anaphase promoting complex subunit 11 (ANAPC11), transcript variant 1, mRNA. /// Homo sapiens anaphase promoting complex subunit 11 (ANAPC11), transcript variant 3, mRNA. /// Homo sapiens anaphase promoting complex subunit 11 (ANAPC11), transcript variant 4, mRNA. /// Homo sapiens anaphase promoting complex subunit 11 (ANAPC11), transcript variant 5, mRNA. /// Homo sapiens anaphase promoting complex subunit 11 (ANAPC11), transcript variant 6, mRNA. /// Homo sapiens anaphase</p> | anaphase promoting complex subunit 11     | 0.007711<br>672 | 1.250778<br>357 |

|  |                                                                           |  |  |  |
|--|---------------------------------------------------------------------------|--|--|--|
|  | promoting complex subunit 11<br>(ANAPC11), transcript variant 7,<br>mRNA. |  |  |  |
|--|---------------------------------------------------------------------------|--|--|--|

|       |                                                                                                                                                                                                                                                                                                                                                                                                                                                                                                                                                                                                                                                                     |                                                |             |              |
|-------|---------------------------------------------------------------------------------------------------------------------------------------------------------------------------------------------------------------------------------------------------------------------------------------------------------------------------------------------------------------------------------------------------------------------------------------------------------------------------------------------------------------------------------------------------------------------------------------------------------------------------------------------------------------------|------------------------------------------------|-------------|--------------|
| FBXW7 | Isoform 4 of F-box/WD repeat-containing protein 7<br>gene:ENSG00000109670 /// Isoform 1 of F-box/WD repeat-containing protein 7 gene:ENSG00000109670 /// Isoform 2 of F-box/WD repeat-containing protein 7<br>gene:ENSG00000109670 /// Isoform 1 of F-box/WD repeat-containing protein 7 gene:ENSG00000109670 /// Homo sapiens archipelago alpha form mRNA, complete cds. /// Homo sapiens F-box and WD repeat domain containing 7 (FBXW7), transcript variant 1, mRNA. /// Homo sapiens F-box and WD repeat domain containing 7 (FBXW7), transcript variant 3, mRNA. /// Homo sapiens F-box and WD repeat domain containing 7 (FBXW7), transcript variant 2, mRNA. | F-box and WD repeat domain containing 7        | 0.000408298 | -1.278626563 |
| CDC20 | Cell division cycle protein 20 homolog gene:ENSG00000117399 /// Cell division cycle protein 20 homolog gene:ENSG00000117399 /// Homo sapiens cDNA FLJ51449 complete cds, highly similar to Cell division cycle protein 20 homolog. /// Homo sapiens cell division cycle 20 homolog (S. cerevisiae) (CDC20), mRNA.                                                                                                                                                                                                                                                                                                                                                   | cell division cycle 20 homolog (S. cerevisiae) | 0.006804429 | 1.15626757   |
| SEN1  | Isoform 2 of Sentrin-specific protease 1 gene:ENSG00000079387 /// Putative uncharacterized protein DKFZp686L1432 gene:ENSG00000079387 /// Homo sapiens SUMO1/sentrin specific peptidase 1, mRNA (cDNA clone MGC:41833 IMAGE:5298667), complete cds. /// Homo sapiens SUMO1/sentrin specific peptidase 1 (SEN1), mRNA.                                                                                                                                                                                                                                                                                                                                               | SUMO1/sentrin specific peptidase 1             | 0.004842029 | 1.195776698  |



|        |                                                                                                                                                                                                                                                                                                                                                                                                                        |                                        |                 |                      |
|--------|------------------------------------------------------------------------------------------------------------------------------------------------------------------------------------------------------------------------------------------------------------------------------------------------------------------------------------------------------------------------------------------------------------------------|----------------------------------------|-----------------|----------------------|
| KLHL9  | Kelch-like protein 9<br>gene:ENSG00000198642 /// Homo sapiens kelch-like 9 (Drosophila), mRNA (cDNA clone MGC:16975 IMAGE:4339111), complete cds. /// Homo sapiens kelch-like 9 (Drosophila) (KLHL9), mRNA.                                                                                                                                                                                                            | kelch-like 9 (Drosophila)              | 0.009409<br>303 | 1.164031<br>936      |
| USP44  | Ubiquitin carboxyl-terminal hydrolase 44 gene:ENSG00000136014 /// Ubiquitin carboxyl-terminal hydrolase 44 gene:ENSG00000136014 /// Homo sapiens ubiquitin specific peptidase 44, mRNA (cDNA clone MGC:26981 IMAGE:4825887), complete cds. /// Homo sapiens ubiquitin specific peptidase 44 (USP44), transcript variant 1, mRNA. /// Homo sapiens ubiquitin specific peptidase 44 (USP44), transcript variant 2, mRNA. | ubiquitin specific peptidase 44        | 0.006599<br>241 | 1.160784<br>088      |
| DUB4   | Ubiquitin carboxyl-terminal hydrolase 17-like protein 6<br>gene:ENSG00000205946 /// Homo sapiens deubiquitinating enzyme DUB4 mRNA, complete cds.                                                                                                                                                                                                                                                                      | deubiquitinating enzyme DUB4           | 0.000571<br>368 | -<br>1.350321<br>293 |
| RAD23A | UV excision repair protein RAD23 homolog A gene:ENSG00000179262 /// Homo sapiens RAD23 homolog A (S. cerevisiae), mRNA (cDNA clone MGC:111083 IMAGE:30389208), complete cds. /// Homo sapiens RAD23 homolog A (S. cerevisiae) (RAD23A), mRNA.                                                                                                                                                                          | RAD23 homolog A (S. cerevisiae)        | 6.02241E<br>-05 | 1.337419<br>968      |
| DZIP3  | Isoform 2 of E3 ubiquitin-protein ligase DZIP3 gene:ENSG00000198919 /// Isoform 1 of E3 ubiquitin-protein ligase DZIP3 gene:ENSG00000198919 /// Homo sapiens DAZ interacting protein 3, zinc finger, mRNA (cDNA clone MGC:75477 IMAGE:30387514), complete cds. /// Homo sapiens DAZ interacting protein 3, zinc finger (DZIP3), mRNA.                                                                                  | DAZ interacting protein 3, zinc finger | 0.000680<br>286 | -<br>1.196710<br>337 |

|         |                                                                                                                                                                                                                                                                                                                                                                                                                                                                                    |                                                |                 |                      |
|---------|------------------------------------------------------------------------------------------------------------------------------------------------------------------------------------------------------------------------------------------------------------------------------------------------------------------------------------------------------------------------------------------------------------------------------------------------------------------------------------|------------------------------------------------|-----------------|----------------------|
| FBXO9   | Isoform 3 of F-box only protein 9<br>gene:ENSG00000112146 /// Isoform 2 of F-box only protein 9<br>gene:ENSG00000112146 /// Isoform 1 of F-box only protein 9<br>gene:ENSG00000112146 /// Homo sapiens cross-immune reaction antigen (VCIA1) mRNA, complete cds. /// Homo sapiens F-box protein 9 (FBXO9), transcript variant 1, mRNA. /// Homo sapiens F-box protein 9 (FBXO9), transcript variant 2, mRNA. /// Homo sapiens F-box protein 9 (FBXO9), transcript variant 3, mRNA. | F-box protein 9                                | 0.004685<br>052 | 1.193559<br>82       |
| RNF144B | Putative uncharacterized protein RNF144B (Fragment)<br>gene:ENSG00000137393 /// E3 ubiquitin-protein ligase RNF144B<br>gene:ENSG00000137393 /// Homo sapiens p53RFP mRNA for p53-inducible RING finger protein, complete cds. /// Homo sapiens ring finger 144B (RNF144B), mRNA.                                                                                                                                                                                                   | ring finger protein 144B                       | 0.001492<br>364 | -<br>1.232445<br>743 |
| TTLL12  | Tubulin--tyrosine ligase-like protein 12<br>gene:ENSG00000100304 /// Putative uncharacterized protein<br>gene:ENSG00000100304 /// Tubulin tyrosine ligase-like family, member 12<br>gene:ENSG00000100304 /// Homo sapiens tubulin tyrosine ligase-like family, member 12, mRNA (cDNA clone MGC:2635 IMAGE:3504490), complete cds. /// Homo sapiens tubulin tyrosine ligase-like family, member 12 (TTLL12), mRNA.                                                                  | tubulin tyrosine ligase-like family, member 12 | 0.004687<br>885 | 1.159580<br>407      |
| UBE2T   | Ubiquitin-conjugating enzyme E2 T<br>gene:ENSG00000077152 /// Homo sapiens ubiquitin-conjugating enzyme E2 mRNA, complete cds. /// Homo sapiens ubiquitin-conjugating enzyme E2T (putative) (UBE2T), mRNA.                                                                                                                                                                                                                                                                         | ubiquitin-conjugating enzyme E2T (putative)    | 0.007508<br>601 | 1.176694<br>88       |

|        |                                                                                                                                                                                                                                                                                                                                                                                                                                                                                                                            |                                                           |             |                  |
|--------|----------------------------------------------------------------------------------------------------------------------------------------------------------------------------------------------------------------------------------------------------------------------------------------------------------------------------------------------------------------------------------------------------------------------------------------------------------------------------------------------------------------------------|-----------------------------------------------------------|-------------|------------------|
| RWDD4A | RWD domain-containing protein 4A<br>gene:ENSG00000182552 /// Homo sapiens RWD domain containing 4A, mRNA (cDNA clone MGC:10198 IMAGE:3909581), complete cds. /// Homo sapiens RWD domain containing 4A (RWDD4A), mRNA.                                                                                                                                                                                                                                                                                                     | RWD domain containing 4A                                  | 0.01070688  | 1.18168903       |
| UBE2J1 | Ubiquitin-conjugating enzyme E2 J1<br>gene:ENSG00000198833 /// Homo sapiens mRNA full length insert cDNA clone EUROIMAGE 1658099. /// Homo sapiens ubiquitin-conjugating enzyme E2, J1 (UBC6 homolog, yeast) (UBE2J1), mRNA.                                                                                                                                                                                                                                                                                               | ubiquitin-conjugating enzyme E2, J1 (UBC6 homolog, yeast) | 9.10548E-05 | 1.323235774      |
| UBE2W  | Putative uncharacterized protein UBE2W (Fragment)<br>gene:ENSG00000104343 /// Isoform 2 of Probable ubiquitin-conjugating enzyme E2 W<br>gene:ENSG00000104343 /// Isoform 1 of Probable ubiquitin-conjugating enzyme E2 W<br>gene:ENSG00000104343 /// Homo sapiens ubiquitin-conjugating enzyme 16 mRNA, complete cds. /// Homo sapiens ubiquitin-conjugating enzyme E2W (putative) (UBE2W), transcript variant 1, mRNA. /// Homo sapiens ubiquitin-conjugating enzyme E2W (putative) (UBE2W), transcript variant 2, mRNA. | ubiquitin-conjugating enzyme E2W (putative)               | 0.001379194 | -<br>1.173523405 |
| FBXL7  | F-box/LRR-repeat protein 7<br>gene:ENSG00000183580 /// Homo sapiens F-box and leucine-rich repeat protein 7, mRNA (cDNA clone MGC:104130 IMAGE:30915585), complete cds. /// Homo sapiens F-box and leucine-rich repeat protein 7 (FBXL7), mRNA.                                                                                                                                                                                                                                                                            | F-box and leucine-rich repeat protein 7                   | 0.004678404 | -<br>1.203793005 |
| HERC5  | hect domain and RLD 5<br>gene:ENSG00000138646 /// Homo sapiens HECT E3 ubiquitin ligase (HERC5) mRNA, complete cds. /// Homo sapiens hect domain and RLD 5 (HERC5), mRNA.                                                                                                                                                                                                                                                                                                                                                  | hect domain and RLD 5                                     | 2.58381E-05 | -<br>1.285115863 |

|        |                                                                                                                                                                                                                                                                                                                                                                                                                                                                                                                                                                                                                                                                                                                           |                                                                                                               |                 |                      |
|--------|---------------------------------------------------------------------------------------------------------------------------------------------------------------------------------------------------------------------------------------------------------------------------------------------------------------------------------------------------------------------------------------------------------------------------------------------------------------------------------------------------------------------------------------------------------------------------------------------------------------------------------------------------------------------------------------------------------------------------|---------------------------------------------------------------------------------------------------------------|-----------------|----------------------|
| UBE2E1 | Ubiquitin-conjugating enzyme E2 E1<br>gene:ENSG00000170142 ///<br>ubiquitin-conjugating enzyme E2E 1<br>isoform 2 gene:ENSG00000170142<br>/// Homo sapiens ubiquitin-<br>conjugating enzyme E2E 1 (UBC4/5<br>homolog, yeast), mRNA (cDNA clone<br>MGC:9268 IMAGE:3853408),<br>complete cds. /// Homo sapiens<br>ubiquitin-conjugating enzyme E2E 1<br>(UBC4/5 homolog, yeast) (UBE2E1),<br>transcript variant 2, mRNA. /// Homo<br>sapiens ubiquitin-conjugating enzyme<br>E2E 1 (UBC4/5 homolog, yeast)<br>(UBE2E1), transcript variant 1, mRNA.                                                                                                                                                                         | ubiquitin-conjugating<br>enzyme E2E 1 (UBC4/5<br>homolog, yeast)                                              | 0.004134<br>323 | 1.192105<br>972      |
| HLCS   | Biotin--protein ligase<br>gene:ENSG00000159267 /// Biotin--<br>protein ligase<br>gene:ENSG00000159267 /// Homo<br>sapiens mRNA for HCS, complete cds.<br>/// Homo sapiens holocarboxylase<br>synthetase (biotin-(propionyl-<br>Coenzyme A-carboxylase (ATP-<br>hydrolysing)) ligase) (HLCS), mRNA.                                                                                                                                                                                                                                                                                                                                                                                                                        | holocarboxylase<br>synthetase (biotin-<br>(propionyl-Coenzyme<br>A-carboxylase (ATP-<br>hydrolysing)) ligase) | 0.000262<br>767 | -<br>1.263342<br>262 |
| ATG4A  | 27 kDa protein<br>gene:ENSG00000101844 /// Isoform<br>1 of Cysteine protease ATG4A<br>gene:ENSG00000101844 /// Isoform<br>3 of Cysteine protease ATG4A<br>gene:ENSG00000101844 /// Isoform<br>2 of Cysteine protease ATG4A<br>gene:ENSG00000101844 /// 42 kDa<br>protein gene:ENSG00000101844 ///<br>49 kDa protein<br>gene:ENSG00000101844 /// Homo<br>sapiens ATG4 autophagy related 4<br>homolog A (S. cerevisiae), mRNA<br>(cDNA clone MGC:62085<br>IMAGE:4594225), complete cds. ///<br>Homo sapiens ATG4 autophagy<br>related 4 homolog A (S. cerevisiae)<br>(ATG4A), transcript variant 2, mRNA.<br>/// Homo sapiens ATG4 autophagy<br>related 4 homolog A (S. cerevisiae)<br>(ATG4A), transcript variant 1, mRNA. | ATG4 autophagy<br>related 4 homolog A<br>(S. cerevisiae)                                                      | 1.66894E<br>-06 | -<br>1.416409<br>983 |

|         |                                                                                                                                                                                                                                                                                                                                                      |                                                  |                 |                      |
|---------|------------------------------------------------------------------------------------------------------------------------------------------------------------------------------------------------------------------------------------------------------------------------------------------------------------------------------------------------------|--------------------------------------------------|-----------------|----------------------|
| ATG7    | Isoform 1 of Autophagy-related protein 7 gene:ENSG00000197548 /// Isoform 2 of Autophagy-related protein 7 gene:ENSG00000197548 /// Homo sapiens E1-like protein mRNA, complete cds. /// Homo sapiens ATG7 autophagy related 7 homolog (S. cerevisiae) (ATG7), mRNA. /// Homo sapiens ATG7 autophagy related 7 homolog (S. cerevisiae) (ATG7), mRNA. | ATG7 autophagy related 7 homolog (S. cerevisiae) | 0.002426<br>188 | -<br>1.208929<br>496 |
| TNFAIP3 | Tumor necrosis factor, alpha-induced protein 3 gene:ENSG00000118503 /// Human tumor necrosis factor alpha inducible protein A20 mRNA, complete cds. /// Homo sapiens tumor necrosis factor, alpha-induced protein 3 (TNFAIP3), mRNA.                                                                                                                 | tumor necrosis factor, alpha-induced protein 3   | 0.001615<br>021 | -<br>1.356807<br>131 |
| UFC1    | Ufm1-conjugating enzyme 1 gene:ENSG00000143222 /// Homo sapiens ubiquitin-fold modifier conjugating enzyme 1, mRNA (cDNA clone MGC:12182 IMAGE:3961569), complete cds. /// Homo sapiens ubiquitin-fold modifier conjugating enzyme 1 (UFC1), mRNA.                                                                                                   | ubiquitin-fold modifier conjugating enzyme 1     | 0.003160<br>85  | 1.189479<br>012      |
| FBXL4   | F-box/LRR-repeat protein 4 gene:ENSG00000112234 /// F-box/LRR-repeat protein 4 gene:ENSG00000112234 /// Homo sapiens F-box and leucine-rich repeat protein 4, mRNA (cDNA clone MGC:111014 IMAGE:6178874), complete cds. /// Homo sapiens F-box and leucine-rich repeat protein 4 (FBXL4), mRNA.                                                      | F-box and leucine-rich repeat protein 4          | 0.008299<br>585 | 1.207732<br>64       |
| RNF26   | RING finger protein 26 gene:ENSG00000173456 /// Homo sapiens ring finger protein 26, mRNA (cDNA clone MGC:2642 IMAGE:3507662), complete cds. /// Homo sapiens ring finger protein 26 (RNF26), mRNA.                                                                                                                                                  | ring finger protein 26                           | 0.002465<br>445 | 1.192581<br>632      |

|        |                                                                                                                                                                                                                                                                                                                                                                                                                                                                                                                                                                                  |                                         |                 |                      |
|--------|----------------------------------------------------------------------------------------------------------------------------------------------------------------------------------------------------------------------------------------------------------------------------------------------------------------------------------------------------------------------------------------------------------------------------------------------------------------------------------------------------------------------------------------------------------------------------------|-----------------------------------------|-----------------|----------------------|
| FANCL  | Putative uncharacterized protein FANCL gene:ENSG00000115392 /// E3 ubiquitin-protein ligase FANCL gene:ENSG00000115392 /// Fanconi anemia, complementation group L isoform 1 gene:ENSG00000115392 /// Putative uncharacterized protein FANCL gene:ENSG00000115392 /// Homo sapiens Fanconi anemia, complementation group L, mRNA (cDNA clone MGC:60295 IMAGE:5180184), complete cds. /// Homo sapiens Fanconi anemia, complementation group L (FANCL), transcript variant 2, mRNA. /// Homo sapiens Fanconi anemia, complementation group L (FANCL), transcript variant 1, mRNA. | Fanconi anemia, complementation group L | 0.006341<br>69  | 1.239930<br>586      |
| RNF138 | Isoform 1 of E3 ubiquitin-protein ligase RNF138 gene:ENSG00000134758 /// Isoform 2 of E3 ubiquitin-protein ligase RNF138 gene:ENSG00000134758 /// Isoform 1 of E3 ubiquitin-protein ligase RNF138 gene:ENSG00000134758 /// Homo sapiens ring finger protein 138, mRNA (cDNA clone MGC:8758 IMAGE:3914953), complete cds. /// Homo sapiens ring finger protein 138 (RNF138), transcript variant 1, mRNA. /// Homo sapiens ring finger protein 138 (RNF138), transcript variant 2, mRNA.                                                                                           | ring finger protein 138                 | 0.005227<br>981 | 1.167172<br>517      |
| UFM1   | Ubiquitin-fold modifier 1 gene:ENSG00000120686 /// Ubiquitin-fold modifier 1 gene:ENSG00000120686 /// Ubiquitin-fold modifier 1 gene:ENSG00000120686 /// Homo sapiens ubiquitin-fold modifier 1, mRNA (cDNA clone MGC:12198 IMAGE:3829206), complete cds. /// Homo sapiens ubiquitin-fold modifier 1 (UFM1), mRNA.                                                                                                                                                                                                                                                               | ubiquitin-fold modifier 1               | 2.28199E<br>-05 | -<br>1.317559<br>431 |

|                            |                                                                                                                                                                                                                                                                                                                                                                                                                                                |                                                    |                   |                      |
|----------------------------|------------------------------------------------------------------------------------------------------------------------------------------------------------------------------------------------------------------------------------------------------------------------------------------------------------------------------------------------------------------------------------------------------------------------------------------------|----------------------------------------------------|-------------------|----------------------|
| UBC                        | ubiquitin C gene:ENSG00000150991<br>/// 44 kDa protein<br>gene:ENSG00000150991 /// Ubiquitin C splice variant<br>gene:ENSG00000150991 /// 44 kDa protein<br>gene:ENSG00000150991 /// Ubiquitin C gene:ENSG00000150991<br>/// 44 kDa protein<br>gene:ENSG00000150991 /// Homo sapiens mRNA for polyubiquitin UbC, complete cds. /// Homo sapiens ubiquitin C (UBC), mRNA.                                                                       | ubiquitin C                                        | 0.007119<br>941   | -<br>1.112166<br>335 |
| RNF43                      | RING finger protein 43<br>gene:ENSG00000108375 /// RING finger protein 43<br>gene:ENSG00000108375 /// Homo sapiens cDNA FLJ77466 complete cds. /// Homo sapiens ring finger protein 43 (RNF43), mRNA.                                                                                                                                                                                                                                          | ring finger protein 43                             | 0.000262<br>242   | -<br>1.403402<br>441 |
| <b>Functional Group 36</b> | <b>Transcript Description</b>                                                                                                                                                                                                                                                                                                                                                                                                                  | <b>Gene Title</b>                                  | <b>Bayes.In p</b> | <b>Fold</b>          |
| AP1G2                      | AP-1 complex subunit gamma-like 2<br>gene:ENSG00000213983 /// AP-1 complex subunit gamma-like 2<br>gene:ENSG00000213983 /// Homo sapiens adaptor-related protein complex 1, gamma 2 subunit, mRNA (cDNA clone MGC:60125 IMAGE:5589077), complete cds. /// Homo sapiens adaptor-related protein complex 1, gamma 2 subunit (AP1G2), mRNA.                                                                                                       | adaptor-related protein complex 1, gamma 2 subunit | 0.006144<br>535   | 1.191765<br>245      |
| AP3M1                      | AP-3 complex subunit mu-1<br>gene:ENSG00000185009 /// AP-3 complex subunit mu-1<br>gene:ENSG00000185009 /// Homo sapiens adaptor-related protein complex 3, mu 1 subunit, mRNA (cDNA clone MGC:75195 IMAGE:6169822), complete cds. /// Homo sapiens adaptor-related protein complex 3, mu 1 subunit (AP3M1), transcript variant 1, mRNA. /// Homo sapiens adaptor-related protein complex 3, mu 1 subunit (AP3M1), transcript variant 2, mRNA. | adaptor-related protein complex 3, mu 1 subunit    | 0.001357<br>981   | 1.181431<br>132      |

|        |                                                                                                                                                                                                                                                                                                                                                                                                                                                                                                                                                                                                                                                                                                                                                                                       |                                                         |             |              |
|--------|---------------------------------------------------------------------------------------------------------------------------------------------------------------------------------------------------------------------------------------------------------------------------------------------------------------------------------------------------------------------------------------------------------------------------------------------------------------------------------------------------------------------------------------------------------------------------------------------------------------------------------------------------------------------------------------------------------------------------------------------------------------------------------------|---------------------------------------------------------|-------------|--------------|
| GPRC5A | Retinoic acid-induced protein 3<br>gene:ENSG0000013588 /// Homo sapiens cDNA FLJ16117 fis, clone ASTRO2003632, highly similar to Retinoic acid-induced protein 3 (G-proteincoupled receptor family C group 5 member A). /// Homo sapiens G protein-coupled receptor, family C, group 5, member A (GPRC5A), mRNA.                                                                                                                                                                                                                                                                                                                                                                                                                                                                      | G protein-coupled receptor, family C, group 5, member A | 4.48256E-06 | -1.572536281 |
| STXBP5 | Isoform 1 of Syntaxin-binding protein 5 gene:ENSG00000164506 /// Isoform 2 of Syntaxin-binding protein 5 gene:ENSG00000164506 /// Isoform 3 of Syntaxin-binding protein 5 gene:ENSG00000164506 /// Syntaxin binding protein 5 gene:ENSG00000164506 /// Syntaxin binding protein 5 gene:ENSG00000164506 /// Isoform 2 of Syntaxin-binding protein 5 gene:ENSG00000164506 /// Isoform 1 of Syntaxin-binding protein 5 gene:ENSG00000164506 /// Isoform 3 of Syntaxin-binding protein 5 gene:ENSG00000164506 /// Homo sapiens mRNA; cDNA DKFZp434L0335 (from clone DKFZp434L0335); complete cds. /// Homo sapiens syntaxin binding protein 5 (tomosyn) (STXBP5), transcript variant 1, mRNA. /// Homo sapiens syntaxin binding protein 5 (tomosyn) (STXBP5), transcript variant 2, mRNA. | syntaxin binding protein 5 (tomosyn)                    | 0.004403472 | -1.193162511 |
| SNAPIN | SNARE-associated protein Snapin gene:ENSG00000143553 /// Homo sapiens SNAP-associated protein, mRNA (cDNA clone MGC:11087 IMAGE:3830132), complete cds. /// Homo sapiens SNAP-associated protein (SNAPIN), mRNA.                                                                                                                                                                                                                                                                                                                                                                                                                                                                                                                                                                      | SNAP-associated protein                                 | 0.003472831 | 1.243222292  |



|                            |                                                                                                                                                                                                                                                                                                                                                                           |                                                                                |                   |              |
|----------------------------|---------------------------------------------------------------------------------------------------------------------------------------------------------------------------------------------------------------------------------------------------------------------------------------------------------------------------------------------------------------------------|--------------------------------------------------------------------------------|-------------------|--------------|
| NECAP1                     | Isoform 1 of Adaptin ear-binding coat-associated protein 1<br>gene:ENSG00000089818 /// Homo sapiens NECAP endocytosis associated 1, mRNA (cDNA clone IMAGE:3940703), complete cds. /// Homo sapiens NECAP endocytosis associated 1 (NECAP1), transcript variant 1, mRNA. /// Homo sapiens NECAP endocytosis associated 1 (NECAP1), transcript variant 2, transcribed RNA. | NECAP endocytosis associated 1                                                 | 0.009131076       | 1.17049267   |
| <b>Functional Group 37</b> | <b>Transcript Description</b>                                                                                                                                                                                                                                                                                                                                             | <b>Gene Title</b>                                                              | <b>Bayes.In p</b> | <b>Fold</b>  |
| CCL3                       | C-C motif chemokine 3<br>gene:ENSG0000006075 /// Human macrophage inflammatory protein (GOS19-1) mRNA, complete cds. /// Homo sapiens chemokine (C-C motif) ligand 3 (CCL3), mRNA.                                                                                                                                                                                        | chemokine (C-C motif) ligand 3                                                 | 0.008993586       | -1.26777808  |
| IL8                        | 11 kDa protein<br>gene:ENSG00000169429 /// Isoform 1 of Interleukin-8<br>gene:ENSG00000169429 /// 15 kDa protein<br>gene:ENSG00000169429 /// Human beta-thromboglobulin-like protein mRNA, complete cds. /// Homo sapiens interleukin 8 (IL8), mRNA.                                                                                                                      | interleukin 8                                                                  | 1.27948E-05       | -1.638323447 |
| CXCL1                      | Growth-regulated alpha protein<br>gene:ENSG00000163739 /// Homo sapiens chemokine (C-X-C motif) ligand 1 (melanoma growth stimulating activity, alpha), mRNA (cDNA clone MGC:9049 IMAGE:3856841), complete cds. /// Homo sapiens chemokine (C-X-C motif) ligand 1 (melanoma growth stimulating activity, alpha) (CXCL1), mRNA.                                            | chemokine (C-X-C motif) ligand 1 (melanoma growth stimulating activity, alpha) | 0.00095477        | -1.316125837 |

|                            |                                                                                                                                                                                                                                                                                                                      |                                   |                   |                      |
|----------------------------|----------------------------------------------------------------------------------------------------------------------------------------------------------------------------------------------------------------------------------------------------------------------------------------------------------------------|-----------------------------------|-------------------|----------------------|
| CXCL14                     | small inducible cytokine B14 precursor gene:ENSG00000145824 /// Homo sapiens clone DNA39523 SCYB14 (UNQ240) mRNA, complete cds. /// Homo sapiens chemokine (C-X-C motif) ligand 14 (CXCL14), mRNA.                                                                                                                   | chemokine (C-X-C motif) ligand 14 | 0.001461<br>12    | 1.254131<br>499      |
| CXCL5                      | C-X-C motif chemokine 5 gene:ENSG00000163735 /// 17 kDa protein gene:ENSG00000163735 /// Homo sapiens chemokine (C-X-C motif) ligand 5, mRNA (cDNA clone MGC:12304 IMAGE:3826939), complete cds. /// Homo sapiens chemokine (C-X-C motif) ligand 5 (CXCL5), mRNA.                                                    | chemokine (C-X-C motif) ligand 5  | 0.003204<br>862   | 1.212422<br>535      |
| <b>Functional Group 38</b> | <b>Transcript Description</b>                                                                                                                                                                                                                                                                                        | <b>Gene Title</b>                 | <b>Bayes.In p</b> | <b>Fold</b>          |
| HOXD1                      | Homeobox protein Hox-D1 gene:ENSG00000128645 /// HOXD1 protein (Fragment) gene:ENSG00000128645 /// cdna:known chromosome:NCBI36:2:176762257:176763880:1 gene:ENSG00000128645 /// Homo sapiens homeobox-containing transcription factor HOXD1 (HOXD1) mRNA, complete cds. /// Homo sapiens homeobox D1 (HOXD1), mRNA. | homeobox D1                       | 0.006838<br>952   | -<br>1.240254<br>45  |
| HMX2                       | Homeobox protein HMX2 gene:ENSG00000188816 /// Homo sapiens H6 family homeobox 2, mRNA (cDNA clone MGC:164389 IMAGE:40146780), complete cds. /// Homo sapiens H6 family homeobox 2 (HMX2), mRNA.                                                                                                                     | H6 family homeobox 2              | 0.007097<br>856   | -<br>1.292386<br>395 |

|       |                                                                                                                                                                                                                                                                                                                                                                                                                                        |                                   |             |              |
|-------|----------------------------------------------------------------------------------------------------------------------------------------------------------------------------------------------------------------------------------------------------------------------------------------------------------------------------------------------------------------------------------------------------------------------------------------|-----------------------------------|-------------|--------------|
| PRRX1 | Isoform PMX1-B of Paired mesoderm homeobox protein 1<br>gene:ENSG00000116132 /// Isoform PMX1-A of Paired mesoderm homeobox protein 1<br>gene:ENSG00000116132 /// Homo sapiens mRNA for paired mesoderm homeobox 1 isoform pmx-1b variant, clone: FCC113D08. /// Homo sapiens paired related homeobox 1 (PRRX1), transcript variant pmx-1b, mRNA. /// Homo sapiens paired related homeobox 1 (PRRX1), transcript variant pmx-1a, mRNA. | paired related homeobox 1         | 0.001019017 | -1.297168695 |
| GBX2  | Homeobox protein GBX-2<br>gene:ENSG00000168505 /// Homo sapiens gastrulation brain homeobox 2, mRNA (cDNA clone MGC:169071 IMAGE:9021448), complete cds. /// Homo sapiens gastrulation brain homeobox 2 (GBX2), mRNA.                                                                                                                                                                                                                  | gastrulation brain homeobox 2     | 0.002958203 | -1.262055554 |
| OTX2  | Isoform 2 of Homeobox protein OTX2<br>gene:ENSG00000165588 /// cdna:known<br>chromosome:NCBI36:14:56338206:56341927:-1 gene:ENSG00000165588<br>/// Homo sapiens orthodenticle homeobox 2, mRNA (cDNA clone MGC:45000 IMAGE:5493541), complete cds. /// Homo sapiens orthodenticle homeobox 2 (OTX2), transcript variant 1, mRNA. /// Homo sapiens orthodenticle homeobox 2 (OTX2), transcript variant 2, mRNA.                         | orthodenticle homeobox 2          | 0.000136851 | 1.300210245  |
| LASS6 | LASS6 protein<br>gene:ENSG00000172292 /// LAG1 longevity assurance homolog 6<br>gene:ENSG00000172292 /// Homo sapiens LAG1 homolog, ceramide synthase 6, mRNA (cDNA clone MGC:129949 IMAGE:40031838), complete cds. /// Homo sapiens LAG1 homolog, ceramide synthase 6 (LASS6), mRNA.                                                                                                                                                  | LAG1 homolog, ceramide synthase 6 | 0.00473864  | -1.155431587 |

|         |                                                                                                                                                                                                                                                                                                                                                                                                                                                                                                                                                                                                                |                                                                     |             |                  |
|---------|----------------------------------------------------------------------------------------------------------------------------------------------------------------------------------------------------------------------------------------------------------------------------------------------------------------------------------------------------------------------------------------------------------------------------------------------------------------------------------------------------------------------------------------------------------------------------------------------------------------|---------------------------------------------------------------------|-------------|------------------|
| KHDRBS1 | Isoform 3 of KH domain-containing, RNA-binding, signal transduction-associated protein 1<br>gene:ENSG00000121774 /// Isoform 1 of KH domain-containing, RNA-binding, signal transduction-associated protein 1<br>gene:ENSG00000121774 /// cDNA FLJ54590, highly similar to KH domain-containing, RNA-binding, signaltransduction-associated protein 1 gene:ENSG00000121774 /// Homo sapiens cDNA FLJ34027 fis, clone FCBBF2003549, highly similar to GAP-associated tyrosine phosphoprotein p62 (Sam68). /// Homo sapiens KH domain containing, RNA binding, signal transduction associated 1 (KHDRBS1), mRNA. | KH domain containing, RNA binding, signal transduction associated 1 | 0.001221063 | 1.178077995      |
| ZNF578  | cdna:known<br>chromosome:NCBI36:19:57648641:57711943:1 gene:ENSG00000221895<br>gene:ENSG00000167555 /// Homo sapiens cDNA FLJ54871 complete cds, moderately similar to Zinc finger protein 611. /// Homo sapiens zinc finger protein 578 (ZNF578), mRNA.                                                                                                                                                                                                                                                                                                                                                       | zinc finger protein 578                                             | 0.001014207 | -<br>1.420350247 |
| NARG1   | Isoform 1 of NMDA receptor-regulated protein 1<br>gene:ENSG00000164134 /// Isoform 2 of NMDA receptor-regulated protein 1 gene:ENSG00000164134 /// Homo sapiens gastric cancer antigen Ga19 mRNA, complete cds. /// Homo sapiens NMDA receptor regulated 1 (NARG1), mRNA.                                                                                                                                                                                                                                                                                                                                      | NMDA receptor regulated 1                                           | 0.008834882 | 1.149497243      |

|        |                                                                                                                                                                                                                                                                                                                                                                                                                                                                                                                                                     |                                                          |             |              |
|--------|-----------------------------------------------------------------------------------------------------------------------------------------------------------------------------------------------------------------------------------------------------------------------------------------------------------------------------------------------------------------------------------------------------------------------------------------------------------------------------------------------------------------------------------------------------|----------------------------------------------------------|-------------|--------------|
| AES    | amino-terminal enhancer of split isoform a gene:ENSG00000104964 /// Amino-terminal enhancer of split gene:ENSG00000104964 /// Homo sapiens cDNA FLJ37272 fis, clone BRAMY2012091, highly similar to Homo sapiens amino-terminal enhancer of split (AES), transcript variant 1, mRNA. /// Homo sapiens amino-terminal enhancer of split (AES), transcript variant 2, mRNA. /// Homo sapiens amino-terminal enhancer of split (AES), transcript variant 1, mRNA. /// Homo sapiens amino-terminal enhancer of split (AES), transcript variant 3, mRNA. | amino-terminal enhancer of split                         | 0.009996952 | 1.133735528  |
| EPAS1  | Endothelial PAS domain-containing protein 1 gene:ENSG00000116016 /// Homo sapiens endothelial PAS domain protein 1, mRNA (cDNA clone MGC:59860 IMAGE:6305604), complete cds. /// Homo sapiens endothelial PAS domain protein 1 (EPAS1), mRNA.                                                                                                                                                                                                                                                                                                       | endothelial PAS domain protein 1                         | 1.99014E-09 | -1.802249992 |
| UTF1   | Undifferentiated embryonic cell transcription factor 1 gene:ENSG00000171794 /// Homo sapiens mRNA for UTF1, complete cds. /// Homo sapiens undifferentiated embryonic cell transcription factor 1 (UTF1), mRNA.                                                                                                                                                                                                                                                                                                                                     | undifferentiated embryonic cell transcription factor 1   | 0.006904401 | -1.173181823 |
| TCF7L1 | Transcription factor 7-like 1 gene:ENSG00000152284 /// Homo sapiens mRNA for HMG-box transcription factor TCF-3, complete cds. /// Homo sapiens transcription factor 7-like 1 (T-cell specific, HMG-box) (TCF7L1), mRNA.                                                                                                                                                                                                                                                                                                                            | transcription factor 7-like 1 (T-cell specific, HMG-box) | 3.57799E-06 | 1.363561661  |
| PLAGL2 | Zinc finger protein PLAGL2 gene:ENSG00000126003 /// Homo sapiens zinc finger protein PLAGL2 (PLAGL2) mRNA, complete cds. /// Homo sapiens pleiomorphic adenoma gene-like 2 (PLAGL2), mRNA.                                                                                                                                                                                                                                                                                                                                                          | pleiomorphic adenoma gene-like 2                         | 0.009657829 | 1.170076945  |

|       |                                                                                                                                                                                                                                                                                                                                                                                                                                                                                                                                                                                         |                                                     |                 |                      |
|-------|-----------------------------------------------------------------------------------------------------------------------------------------------------------------------------------------------------------------------------------------------------------------------------------------------------------------------------------------------------------------------------------------------------------------------------------------------------------------------------------------------------------------------------------------------------------------------------------------|-----------------------------------------------------|-----------------|----------------------|
| MED14 | Mediator of RNA polymerase II transcription subunit 14<br>gene:ENSG00000180182 /// Homo sapiens vitamin D receptor-interacting protein complex component DRIP150 (DRIP150) mRNA, complete cds. /// Homo sapiens mediator complex subunit 14 (MED14), mRNA.                                                                                                                                                                                                                                                                                                                              | mediator complex subunit 14                         | 0.005748<br>327 | 1.173182<br>204      |
| FOSL1 | Fos-related antigen 1<br>gene:ENSG00000175592 /// Homo sapiens FOS-like antigen 1, mRNA (cDNA clone MGC:9264 IMAGE:3925241), complete cds. /// Homo sapiens FOS-like antigen 1 (FOSL1), mRNA.                                                                                                                                                                                                                                                                                                                                                                                           | FOS-like antigen 1                                  | 0.004718<br>702 | -<br>1.166432<br>491 |
| NR5A2 | Isoform 2 of Nuclear receptor subfamily 5 group A member 2<br>gene:ENSG00000116833 /// Isoform 1 of Nuclear receptor subfamily 5 group A member 2<br>gene:ENSG00000116833 /// Alpha1-fetoprotein transcription factor short variant gene:ENSG00000116833 /// Nuclear receptor NR5A2<br>gene:ENSG00000116833 /// Homo sapiens mRNA for FTZ-F1 related protein, complete cds. /// Homo sapiens nuclear receptor subfamily 5, group A, member 2 (NR5A2), transcript variant 2, mRNA. /// Homo sapiens nuclear receptor subfamily 5, group A, member 2 (NR5A2), transcript variant 1, mRNA. | nuclear receptor subfamily 5, group A, member 2     | 1.32405E<br>-05 | -<br>1.412950<br>191 |
| VPS36 | Isoform 1 of Vacuolar protein-sorting-associated protein 36<br>gene:ENSG00000136100 /// Homo sapiens vacuolar protein sorting 36 homolog (S. cerevisiae), mRNA (cDNA clone MGC:33029 IMAGE:4814999), complete cds. /// Homo sapiens vacuolar protein sorting 36 homolog (S. cerevisiae) (VPS36), mRNA.                                                                                                                                                                                                                                                                                  | vacuolar protein sorting 36 homolog (S. cerevisiae) | 0.000374<br>871 | 1.276504<br>481      |

|        |                                                                                                                                                                                                                                                                                                                                                                                                                                                                                                                                                                                                                                          |                                                                                   |                 |                      |
|--------|------------------------------------------------------------------------------------------------------------------------------------------------------------------------------------------------------------------------------------------------------------------------------------------------------------------------------------------------------------------------------------------------------------------------------------------------------------------------------------------------------------------------------------------------------------------------------------------------------------------------------------------|-----------------------------------------------------------------------------------|-----------------|----------------------|
| MMS19  | cDNA FLJ55586, highly similar to MMS19-like protein<br>gene:ENSG00000155229 /// Putative uncharacterized protein<br>gene:ENSG00000155229 /// Isoform 2 of MMS19 nucleotide excision repair protein homolog<br>gene:ENSG00000155229 /// cDNA FLJ55586, highly similar to MMS19-like protein gene:ENSG00000155229 /// Isoform 5 of MMS19 nucleotide excision repair protein homolog<br>gene:ENSG00000155229 /// Homo sapiens MMS19 nucleotide excision repair homolog (S. cerevisiae), mRNA (cDNA clone MGC:150738 IMAGE:40125680), complete cds. /// Homo sapiens MMS19 nucleotide excision repair homolog (S. cerevisiae) (MMS19), mRNA. | MMS19 nucleotide excision repair homolog (S. cerevisiae)                          | 0.008187<br>53  | 1.140107<br>85       |
| KLF5   | Kruppel-like factor 5<br>gene:ENSG00000102554 /// Homo sapiens colon Kruppel-like factor (CKLF) mRNA, complete cds. /// Homo sapiens Kruppel-like factor 5 (intestinal) (KLF5), mRNA.                                                                                                                                                                                                                                                                                                                                                                                                                                                    | Kruppel-like factor 5 (intestinal)                                                | 0.000341<br>289 | -<br>1.302502<br>438 |
| CITED2 | Isoform 1 of Cbp/p300-interacting transactivator 2<br>gene:ENSG00000164442 /// Isoform 2 of Cbp/p300-interacting transactivator 2<br>gene:ENSG00000164442 /// Homo sapiens Cbp/p300-interacting transactivator, with Glu/Asp-rich carboxy-terminal domain, 2, mRNA (cDNA clone MGC:10574 IMAGE:3640855), complete cds. /// Homo sapiens Cbp/p300-interacting transactivator, with Glu/Asp-rich carboxy-terminal domain, 2 (CITED2), mRNA.                                                                                                                                                                                                | Cbp/p300-interacting transactivator, with Glu/Asp-rich carboxy-terminal domain, 2 | 0.000282<br>325 | -<br>1.236838<br>276 |

|        |                                                                                                                                                                                                                                                                                                                                                                                                                    |                         |                 |                      |
|--------|--------------------------------------------------------------------------------------------------------------------------------------------------------------------------------------------------------------------------------------------------------------------------------------------------------------------------------------------------------------------------------------------------------------------|-------------------------|-----------------|----------------------|
| ZNF287 | zinc finger protein 287<br>gene:ENSG00000141040 /// zinc finger protein 287<br>gene:ENSG00000141040 /// zinc finger protein 287<br>gene:ENSG00000141040 /// Homo sapiens zinc finger protein ZNF287 (ZNF287) mRNA, complete cds. /// Homo sapiens zinc finger protein 287 (ZNF287), mRNA.                                                                                                                          | zinc finger protein 287 | 0.003039<br>452 | 1.437733<br>624      |
| EBF2   | cdna:known<br>chromosome:NCBI36:8:25758042:25958292:-1 gene:ENSG00000221818 /// Homo sapiens early B-cell factor 2 (EBF2) mRNA, complete cds, alternatively spliced. /// Homo sapiens early B-cell factor 2 (EBF2), mRNA.                                                                                                                                                                                          | early B-cell factor 2   | 0.004011<br>726 | 1.377185<br>453      |
| FOXO4  | Isoform 1 of Forkhead box protein O4<br>gene:ENSG00000184481 /// Isoform 1 of Forkhead box protein O4<br>gene:ENSG00000184481 /// Isoform Zeta of Forkhead box protein O4<br>gene:ENSG00000184481 /// Isoform Zeta of Forkhead box protein O4<br>gene:ENSG00000184481 /// Homo sapiens forkhead box O4, mRNA (cDNA clone MGC:120490 IMAGE:40025381), complete cds. /// Homo sapiens forkhead box O4 (FOXO4), mRNA. | forkhead box O4         | 0.005084<br>212 | 1.183502<br>061      |
| CA13   | Carbonic anhydrase 13<br>gene:ENSG00000185015 /// Homo sapiens carbonic anhydrase XIII, mRNA (cDNA clone MGC:59868 IMAGE:6083105), complete cds. /// Homo sapiens carbonic anhydrase XIII (CA13), mRNA.                                                                                                                                                                                                            | carbonic anhydrase XIII | 0.002780<br>801 | -<br>1.337627<br>917 |
| ZNF350 | Zinc finger protein 350<br>gene:ENSG00000171032 /// Homo sapiens KRAB zinc finger protein ZFQR mRNA, complete cds. /// Homo sapiens zinc finger protein 350 (ZNF350), mRNA.                                                                                                                                                                                                                                        | zinc finger protein 350 | 0.000321<br>715 | -<br>1.298051<br>552 |



|       |                                                                                                                                                                                                                                                                                                                                                                                                                                                                                                                                                                                                                        |                                                  |                 |                      |
|-------|------------------------------------------------------------------------------------------------------------------------------------------------------------------------------------------------------------------------------------------------------------------------------------------------------------------------------------------------------------------------------------------------------------------------------------------------------------------------------------------------------------------------------------------------------------------------------------------------------------------------|--------------------------------------------------|-----------------|----------------------|
| EID1  | Isoform 1 of EP300-interacting inhibitor of differentiation 1<br>gene:ENSG00000178558 /// Homo sapiens Rb- and p300-binding protein EID-1 mRNA, complete cds. /// Homo sapiens EP300 interacting inhibitor of differentiation 1 (EID1), mRNA.                                                                                                                                                                                                                                                                                                                                                                          | EP300 interacting inhibitor of differentiation 1 | 0.000375<br>162 | 1.223215<br>966      |
| MDM4  | Isoform 1 of Protein Mdm4<br>gene:ENSG00000198625 /// Mdm4 p53 binding protein homolog<br>gene:ENSG00000198625 /// MDM4 protein<br>gene:ENSG00000198625 /// Double minute 4 variant<br>gene:ENSG00000198625 /// Mdm4 p53 binding protein homolog<br>gene:ENSG00000198625 /// Mdm4 p53 binding protein homolog<br>gene:ENSG00000198625 /// Homo sapiens MDM2-like p53-binding protein (MDMX) mRNA, complete cds. /// Homo sapiens Mdm4 p53 binding protein homolog (mouse) (MDM4), transcript variant 1, mRNA. /// Homo sapiens Mdm4 p53 binding protein homolog (mouse) (MDM4), transcript variant 2, transcribed RNA. | Mdm4 p53 binding protein homolog (mouse)         | 0.000898<br>8   | -<br>1.253372<br>911 |
| RCOR2 | REST corepressor 2<br>gene:ENSG00000167771 /// Homo sapiens REST corepressor 2, mRNA (cDNA clone MGC:23462 IMAGE:4762190), complete cds. /// Homo sapiens REST corepressor 2 (RCOR2), mRNA.                                                                                                                                                                                                                                                                                                                                                                                                                            | REST corepressor 2                               | 0.003256<br>755 | 1.192863<br>771      |

|        |                                                                                                                                                                                                                                                                                                                                                                                                                                                                                                                                                               |                                                                        |             |              |
|--------|---------------------------------------------------------------------------------------------------------------------------------------------------------------------------------------------------------------------------------------------------------------------------------------------------------------------------------------------------------------------------------------------------------------------------------------------------------------------------------------------------------------------------------------------------------------|------------------------------------------------------------------------|-------------|--------------|
| ID1    | Isoform ID-B of DNA-binding protein inhibitor ID-1<br>gene:ENSG00000125968 /// Isoform ID-A of DNA-binding protein inhibitor ID-1 gene:ENSG00000125968 /// Homo sapiens inhibitor of DNA binding 1, dominant negative helix-loop-helix protein, mRNA (cDNA clone MGC:9178 IMAGE:3862019), complete cds. /// Homo sapiens inhibitor of DNA binding 1, dominant negative helix-loop-helix protein (ID1), transcript variant 2, mRNA. /// Homo sapiens inhibitor of DNA binding 1, dominant negative helix-loop-helix protein (ID1), transcript variant 1, mRNA. | inhibitor of DNA binding 1, dominant negative helix-loop-helix protein | 0.001705568 | 1.24362227   |
| HEXIM1 | Protein HEXIM1<br>gene:ENSG00000186834 /// Homo sapiens mRNA for HEXIM1 protein, complete cds. /// Homo sapiens hexamethylene bis-acetamide inducible 1 (HEXIM1), mRNA.                                                                                                                                                                                                                                                                                                                                                                                       | hexamethylene bis-acetamide inducible 1                                | 0.009376537 | -1.177238359 |
| ARID5B | Isoform 1 of AT-rich interactive domain-containing protein 5B<br>gene:ENSG00000150347 /// Isoform 2 of AT-rich interactive domain-containing protein 5B<br>gene:ENSG00000150347 /// Homo sapiens AT rich interactive domain 5B (MRF1-like), mRNA (cDNA clone IMAGE:3681098), partial cds. /// Homo sapiens AT rich interactive domain 5B (MRF1-like) (ARID5B), mRNA.                                                                                                                                                                                          | AT rich interactive domain 5B (MRF1-like)                              | 2.40718E-10 | -1.951024175 |
| SNAI2  | Zinc finger protein SNAI2<br>gene:ENSG00000019549 /// Zinc finger protein SNAI2<br>gene:ENSG00000019549 /// Homo sapiens snail homolog 2 (Drosophila), mRNA (cDNA clone MGC:10182 IMAGE:3908245), complete cds. /// Homo sapiens snail homolog 2 (Drosophila) (SNAI2), mRNA.                                                                                                                                                                                                                                                                                  | snail homolog 2 (Drosophila)                                           | 1.23517E-07 | -1.793109859 |

|         |                                                                                                                                                                                                                                                                                                                                                                                                                                                                                                                                                                                                                                                                                                                                                                                                                                                                                                                                                                                                                                                                              |                                                     |             |              |
|---------|------------------------------------------------------------------------------------------------------------------------------------------------------------------------------------------------------------------------------------------------------------------------------------------------------------------------------------------------------------------------------------------------------------------------------------------------------------------------------------------------------------------------------------------------------------------------------------------------------------------------------------------------------------------------------------------------------------------------------------------------------------------------------------------------------------------------------------------------------------------------------------------------------------------------------------------------------------------------------------------------------------------------------------------------------------------------------|-----------------------------------------------------|-------------|--------------|
| UIMC1   | gi 17981852 ref NC_001807.4 :c7517-7446; gene=TRNS1; product=tRNA-Ser /// Homo sapiens X2HRIP110 (X2HRIP110) mRNA, complete cds.                                                                                                                                                                                                                                                                                                                                                                                                                                                                                                                                                                                                                                                                                                                                                                                                                                                                                                                                             | ubiquitin interaction motif containing 1            | 0.009654337 | -1.151343323 |
| LRRFIP1 | leucine rich repeat (in FLII) interacting protein 1 isoform 1<br>gene:ENSG00000124831 /// Isoform 2 of Leucine-rich repeat flightless-interacting protein 1<br>gene:ENSG00000124831 /// Isoform 1 of Leucine-rich repeat flightless-interacting protein 1<br>gene:ENSG00000124831 /// Isoform 3 of Leucine-rich repeat flightless-interacting protein 1<br>gene:ENSG00000124831 /// Homo sapiens leucine rich repeat (in FLII) interacting protein 1, mRNA (cDNA clone MGC:119739 IMAGE:40027218), complete cds. /// Homo sapiens leucine rich repeat (in FLII) interacting protein 1 (LRRFIP1), transcript variant 2, mRNA. /// Homo sapiens leucine rich repeat (in FLII) interacting protein 1 (LRRFIP1), transcript variant 3, mRNA. /// Homo sapiens leucine rich repeat (in FLII) interacting protein 1 (LRRFIP1), transcript variant 5, mRNA. /// Homo sapiens leucine rich repeat (in FLII) interacting protein 1 (LRRFIP1), transcript variant 4, mRNA. /// Homo sapiens leucine rich repeat (in FLII) interacting protein 1 (LRRFIP1), transcript variant 1, mRNA. | leucine rich repeat (in FLII) interacting protein 1 | 0.970893984 | 1.001880254  |

|         |                                                                                                                                                                                                                                                                                                                                                                                                                                                                                                                                                                                      |                                             |             |              |
|---------|--------------------------------------------------------------------------------------------------------------------------------------------------------------------------------------------------------------------------------------------------------------------------------------------------------------------------------------------------------------------------------------------------------------------------------------------------------------------------------------------------------------------------------------------------------------------------------------|---------------------------------------------|-------------|--------------|
| PRDM1   | PR domain containing 1, with ZNF domain isoform 1<br>gene:ENSG00000057657 /// PR domain containing 1, with ZNF domain isoform 1<br>gene:ENSG00000057657 /// PR domain containing 1, with ZNF domain gene:ENSG00000057657 /// PR domain containing 1, with ZNF domain isoform 2<br>gene:ENSG00000057657 /// Homo sapiens PR domain-containing protein 1 alpha (PRDM1) mRNA, complete cds. /// Homo sapiens PR domain containing 1, with ZNF domain (PRDM1), transcript variant 2, mRNA. /// Homo sapiens PR domain containing 1, with ZNF domain (PRDM1), transcript variant 1, mRNA. | PR domain containing 1, with ZNF domain     | 5.57321E-05 | -1.419559737 |
| OVOL1   | Putative transcription factor Ovo-like 1 gene:ENSG00000172818 /// Homo sapiens ovo-like 1(Drosophila), mRNA (cDNA clone MGC:71812 IMAGE:30343789), complete cds. /// Homo sapiens ovo-like 1(Drosophila) (OVOL1), mRNA.                                                                                                                                                                                                                                                                                                                                                              | ovo-like 1(Drosophila)                      | 0.005165018 | -1.31341653  |
| RABGGTB | Geranylgeranyl transferase type-2 subunit beta gene:ENSG00000137955 /// Rab geranylgeranyltransferase, beta subunit variant (Fragment) gene:ENSG00000137955 /// Rab geranylgeranyltransferase, beta subunit gene:ENSG00000137955 /// Homo sapiens Rab geranylgeranyltransferase, beta subunit, mRNA (cDNA clone MGC:23688 IMAGE:4290610), complete cds. /// Homo sapiens Rab geranylgeranyltransferase, beta subunit (RABGGTB), mRNA.                                                                                                                                                | Rab geranylgeranyltransferase, beta subunit | 0.738662271 | 1.015725969  |

|        |                                                                                                                                                                                                                                                                                                                                                                                                                                                                                                                                                                                                                                                                                                                                                                                                                                                                                                                                                                                                                                                                                                                                                                                                                                                  |                                          |             |             |
|--------|--------------------------------------------------------------------------------------------------------------------------------------------------------------------------------------------------------------------------------------------------------------------------------------------------------------------------------------------------------------------------------------------------------------------------------------------------------------------------------------------------------------------------------------------------------------------------------------------------------------------------------------------------------------------------------------------------------------------------------------------------------------------------------------------------------------------------------------------------------------------------------------------------------------------------------------------------------------------------------------------------------------------------------------------------------------------------------------------------------------------------------------------------------------------------------------------------------------------------------------------------|------------------------------------------|-------------|-------------|
| HIPK1  | <p>Isoform 4 of Homeodomain-interacting protein kinase 1<br/> gene:ENSG00000163349 /// cDNA FLJ57817, highly similar to Homeodomain-interacting protein kinase 1 gene:ENSG00000163349 /// Homeodomain interacting protein kinase 1 gene:ENSG00000163349 /// Isoform 2 of Homeodomain-interacting protein kinase 1 gene:ENSG00000163349 /// cDNA FLJ57817, highly similar to Homeodomain-interacting protein kinase 1 gene:ENSG00000163349 /// Homeodomain interacting protein kinase 1 gene:ENSG00000163349 /// Isoform 3 of Homeodomain-interacting protein kinase 1 gene:ENSG00000163349 /// Isoform 4 of Homeodomain-interacting protein kinase 1 gene:ENSG00000163349 /// Isoform 4 of Homeodomain-interacting protein kinase 1 gene:ENSG00000163349 /// Homo sapiens HIPK1 mRNA for homeodomain-interacting protein kinase-1, complete cds. /// Homo sapiens homeodomain interacting protein kinase 1 (HIPK1), transcript variant 2, mRNA. /// Homo sapiens homeodomain interacting protein kinase 1 (HIPK1), transcript variant 1, mRNA. /// Homo sapiens homeodomain interacting protein kinase 1 (HIPK1), transcript variant 3, mRNA. /// Homo sapiens homeodomain interacting protein kinase 1 (HIPK1), transcript variant 4, mRNA.</p> | homeodomain interacting protein kinase 1 | 0.009937791 | 1.150503935 |
| ZNF624 | <p>zinc finger protein 624<br/> gene:ENSG00000197566 /// Homo sapiens zinc finger protein 624, mRNA (cDNA clone MGC:119602 IMAGE:40008882), complete cds. /// Homo sapiens zinc finger protein 624 (ZNF624), mRNA.</p>                                                                                                                                                                                                                                                                                                                                                                                                                                                                                                                                                                                                                                                                                                                                                                                                                                                                                                                                                                                                                           | zinc finger protein 624                  | 0.006764563 | 1.298925379 |

|        |                                                                                                                                                                                                                                                                                                                                                                                                                                                                                                                                                                                                                                      |                                                   |                 |                      |
|--------|--------------------------------------------------------------------------------------------------------------------------------------------------------------------------------------------------------------------------------------------------------------------------------------------------------------------------------------------------------------------------------------------------------------------------------------------------------------------------------------------------------------------------------------------------------------------------------------------------------------------------------------|---------------------------------------------------|-----------------|----------------------|
| ZFP36  | Similar to Butyrate response factor 2 gene:ENSG00000128016 /// H.sapiens zinc finger transcriptional regulator mRNA, complete cds. /// Homo sapiens zinc finger protein 36, C3H type, homolog (mouse) (ZFP36), mRNA.                                                                                                                                                                                                                                                                                                                                                                                                                 | zinc finger protein 36, C3H type, homolog (mouse) | 0.003252<br>593 | -<br>1.264515<br>417 |
| ZNF101 | Zinc finger protein 101 gene:ENSG00000181896 /// Homo sapiens cDNA FLJ39850 fis, clone SPLEN2014739, highly similar to Zinc finger protein 101. /// Homo sapiens zinc finger protein 101 (ZNF101), mRNA.                                                                                                                                                                                                                                                                                                                                                                                                                             | zinc finger protein 101                           | 0.002078<br>623 | -<br>1.156741<br>455 |
| ZNF79  | Zinc finger protein 79 gene:ENSG00000196152 /// Homo sapiens zinc finger protein 79, mRNA (cDNA clone MGC:71125 IMAGE:3944657), complete cds. /// Homo sapiens zinc finger protein 79 (ZNF79), mRNA.                                                                                                                                                                                                                                                                                                                                                                                                                                 | zinc finger protein 79                            | 0.001381<br>433 | -<br>1.246329<br>313 |
| RORA   | Isoform Alpha-3 of Nuclear receptor ROR-alpha gene:ENSG00000069667 /// Isoform Alpha-1 of Nuclear receptor ROR-alpha gene:ENSG00000069667 /// Isoform Alpha-2 of Nuclear receptor ROR-alpha gene:ENSG00000069667 /// Human orphan hormone nuclear receptor RORalpha2 mRNA, complete cds. /// Homo sapiens RAR-related orphan receptor A (RORA), transcript variant 2, mRNA. /// Homo sapiens RAR-related orphan receptor A (RORA), transcript variant 1, mRNA. /// Homo sapiens RAR-related orphan receptor A (RORA), transcript variant 4, mRNA. /// Homo sapiens RAR-related orphan receptor A (RORA), transcript variant 3, mRNA. | RAR-related orphan receptor A                     | 0.003579<br>702 | -<br>1.234817<br>67  |

|        |                                                                                                                                                                                                                                                                                                                                                                                                                                                                                                                                                                                                                                                                                                                 |                                                           |                 |                      |
|--------|-----------------------------------------------------------------------------------------------------------------------------------------------------------------------------------------------------------------------------------------------------------------------------------------------------------------------------------------------------------------------------------------------------------------------------------------------------------------------------------------------------------------------------------------------------------------------------------------------------------------------------------------------------------------------------------------------------------------|-----------------------------------------------------------|-----------------|----------------------|
| TP53I3 | <p>Isoform 1 of Putative quinone oxidoreductase<br/> gene:ENSG00000115129 /// Isoform 2 of Putative quinone oxidoreductase<br/> gene:ENSG00000115129 /// Isoform 1 of Putative quinone oxidoreductase<br/> gene:ENSG00000115129 /// Isoform 2 of Putative quinone oxidoreductase<br/> gene:ENSG00000115129 /// Homo sapiens mRNA for tumor protein p53 inducible protein 3 variant, clone: FCC106D10. /// Homo sapiens tumor protein p53 inducible protein 3 (TP53I3), transcript variant 2, mRNA. /// Homo sapiens tumor protein p53 inducible protein 3 (TP53I3), transcript variant 1, mRNA.</p>                                                                                                             | tumor protein p53 inducible protein 3                     | 0.000171<br>373 | -<br>1.284050<br>788 |
| RFXANK | <p>Isoform Long of DNA-binding protein RFXANK gene:ENSG00000064490 /// Regulatory factor X-associated ankyrin-containing protein gene:ENSG00000064490 /// Regulatory factor X-associated ankyrin-containing protein gene:ENSG00000064490 /// Isoform Long of DNA-binding protein RFXANK gene:ENSG00000064490 /// Homo sapiens regulatory factor X-associated ankyrin-containing protein, transcript variant 1, mRNA (cDNA clone MGC:138628 IMAGE:40032319), complete cds. /// Homo sapiens regulatory factor X-associated ankyrin-containing protein (RFXANK), transcript variant 2, mRNA. /// Homo sapiens regulatory factor X-associated ankyrin-containing protein (RFXANK), transcript variant 1, mRNA.</p> | regulatory factor X-associated ankyrin-containing protein | 0.000718<br>138 | 1.255361<br>495      |

|      |                                                                                                                                                                                                                                                                                                                                                                                                                                                                                                                                                              |                                   |                 |                      |
|------|--------------------------------------------------------------------------------------------------------------------------------------------------------------------------------------------------------------------------------------------------------------------------------------------------------------------------------------------------------------------------------------------------------------------------------------------------------------------------------------------------------------------------------------------------------------|-----------------------------------|-----------------|----------------------|
| TTC3 | Isoform TRPDI of Tetratricopeptide repeat protein 3<br>gene:ENSG00000182670 /// Putative uncharacterized protein TTC3<br>gene:ENSG00000182670 /// Isoform TRPDI of Tetratricopeptide repeat protein 3<br>gene:ENSG00000182670 /// Isoform TRPDI of Tetratricopeptide repeat protein 3<br>gene:ENSG00000182670 /// Homo sapiens mRNA for possible protein TPRDII, complete cds. /// Homo sapiens tetratricopeptide repeat domain 3 (TTC3), transcript variant 1, mRNA. /// Homo sapiens tetratricopeptide repeat domain 3 (TTC3), transcript variant 2, mRNA. | tetratricopeptide repeat domain 3 | 0.003725<br>363 | 1.197740<br>027      |
| AFF3 | AF4/FMR2 family, member 3 isoform 1<br>gene:ENSG00000144218 /// AF4/FMR2 family, member 3 isoform 2<br>gene:ENSG00000144218 /// cdna:known<br>chromosome:NCBI36:2:99534015:100089022:-1<br>gene:ENSG00000144218 /// cdna:known<br>chromosome:NCBI36:2:99534248:100087610:-1<br>gene:ENSG00000144218 /// Human lymphoid nuclear protein (LAF-4) mRNA, complete cds. /// Homo sapiens AF4/FMR2 family, member 3 (AFF3), transcript variant 1, mRNA. /// Homo sapiens AF4/FMR2 family, member 3 (AFF3), transcript variant 2, mRNA.                             | AF4/FMR2 family, member 3         | 0.007118<br>051 | -<br>1.315258<br>268 |
| AHR  | Aryl hydrocarbon receptor<br>gene:ENSG00000106546 /// Aryl hydrocarbon receptor<br>gene:ENSG00000106546 /// Homo sapiens aryl hydrocarbon receptor, mRNA (cDNA clone MGC:87401 IMAGE:30342582), complete cds. /// Homo sapiens aryl hydrocarbon receptor (AHR), mRNA.                                                                                                                                                                                                                                                                                        | aryl hydrocarbon receptor         | 0.000716<br>366 | -<br>1.279894<br>642 |



|        |                                                                                                                                                                                                                                                                                                                         |                                                                       |             |              |
|--------|-------------------------------------------------------------------------------------------------------------------------------------------------------------------------------------------------------------------------------------------------------------------------------------------------------------------------|-----------------------------------------------------------------------|-------------|--------------|
| LPP    | Lipoma-preferred partner gene:ENSG00000145012 /// Homo sapiens LIM domain containing preferred translocation partner in lipoma, mRNA (cDNA clone MGC:163456 IMAGE:40146615), complete cds. /// Homo sapiens LIM domain containing preferred translocation partner in lipoma (LPP), mRNA.                                | LIM domain containing preferred translocation partner in lipoma       | 0.000590115 | -1.2073213   |
| ZRSR1  | U2 small nuclear ribonucleoprotein auxiliary factor 35 kDa subunit-related protein 1 gene:ENSG00000212643 /// Homo sapiens zinc finger (CCCH type), RNA-binding motif and serine/arginine rich 1, mRNA (cDNA clone MGC:132471 IMAGE:8143814), complete cds.                                                             | zinc finger (CCCH type), RNA-binding motif and serine/arginine rich 1 | 2.41964E-06 | -1.590036605 |
| PRDM14 | PR domain zinc finger protein 14 gene:ENSG00000147596 /// Homo sapiens PR-domain containing protein 14 (PRDM14) mRNA, complete cds. /// Homo sapiens PR domain containing 14 (PRDM14), mRNA.                                                                                                                            | PR domain containing 14                                               | 1.30483E-05 | 1.316307536  |
| ZNF28  | Isoform 1 of Zinc finger protein 28 gene:ENSG00000198538 /// Homo sapiens cDNA FLJ58669 complete cds, highly similar to Zinc finger protein 28. /// Homo sapiens zinc finger protein 28 (ZNF28), mRNA.                                                                                                                  | zinc finger protein 28                                                | 0.002340631 | -1.179948066 |
| ZBED4  | Zinc finger BED domain-containing protein 4 gene:ENSG00000100426 /// Zinc finger BED domain-containing protein 4 gene:ENSG00000100426 /// Homo sapiens zinc finger, BED-type containing 4, mRNA (cDNA clone MGC:176685 IMAGE:8862564), complete cds. /// Homo sapiens zinc finger, BED-type containing 4 (ZBED4), mRNA. | zinc finger, BED-type containing 4                                    | 0.0012558   | 1.242612363  |

|        |                                                                                                                                                                                                                                                                                                                                                                                                                                                                                                                                                                                                                                           |                                                     |                 |                      |
|--------|-------------------------------------------------------------------------------------------------------------------------------------------------------------------------------------------------------------------------------------------------------------------------------------------------------------------------------------------------------------------------------------------------------------------------------------------------------------------------------------------------------------------------------------------------------------------------------------------------------------------------------------------|-----------------------------------------------------|-----------------|----------------------|
| DNAJA4 | DnaJ (Hsp40) homolog, subfamily A, member 4 isoform 1<br>gene:ENSG00000140403 /// DnaJ homolog subfamily A member 4<br>gene:ENSG00000140403 /// DnaJ homolog subfamily A member 4<br>gene:ENSG00000140403 /// Homo sapiens DnaJ (Hsp40) homolog, subfamily A, member 4, mRNA (cDNA clone MGC:33001 IMAGE:4831235), complete cds. /// Homo sapiens DnaJ (Hsp40) homolog, subfamily A, member 4 (DNAJA4), transcript variant 1, mRNA. /// Homo sapiens DnaJ (Hsp40) homolog, subfamily A, member 4 (DNAJA4), transcript variant 2, mRNA. /// Homo sapiens DnaJ (Hsp40) homolog, subfamily A, member 4 (DNAJA4), transcript variant 3, mRNA. | DnaJ (Hsp40) homolog, subfamily A, member 4         | 0.001458<br>55  | -<br>1.271389<br>224 |
| ASH1L  | Probable histone-lysine N-methyltransferase ASH1L<br>gene:ENSG00000116539 /// ash1 (absent, small, or homeotic)-like<br>gene:ENSG00000116539 /// Homo sapiens ASH1 mRNA, complete cds. /// Homo sapiens ash1 (absent, small, or homeotic)-like (Drosophila) (ASH1L), mRNA.                                                                                                                                                                                                                                                                                                                                                                | ash1 (absent, small, or homeotic)-like (Drosophila) | 0.006650<br>968 | -<br>1.182650<br>113 |

|        |                                                                                                                                                                                                                                                                                                                                                                                                                                                                                                                                                                                                                              |                                                  |                 |                      |
|--------|------------------------------------------------------------------------------------------------------------------------------------------------------------------------------------------------------------------------------------------------------------------------------------------------------------------------------------------------------------------------------------------------------------------------------------------------------------------------------------------------------------------------------------------------------------------------------------------------------------------------------|--------------------------------------------------|-----------------|----------------------|
| SMYD3  | Isoform 1 of SET and MYND domain-containing protein 3<br>gene:ENSG00000185420 /// Isoform 2 of SET and MYND domain-containing protein 3<br>gene:ENSG00000185420 /// Isoform 3 of SET and MYND domain-containing protein 3<br>gene:ENSG00000185420 /// Isoform 3 of SET and MYND domain-containing protein 3<br>gene:ENSG00000185420 /// Isoform 2 of SET and MYND domain-containing protein 3<br>gene:ENSG00000185420 /// SET and MYND domain containing 3<br>gene:ENSG00000185420 /// Homo sapiens SMYD3 mRNA for histone methyltransferase, complete cds. /// Homo sapiens SET and MYND domain containing 3 (SMYD3), mRNA. | SET and MYND domain containing 3                 | 0.007585<br>27  | 1.201479<br>429      |
| POLR2F | Polymerase (RNA) II (DNA directed) polypeptide F<br>gene:ENSG00000100142 /// DNA-directed RNA polymerases I, II, and III subunit RPABC2<br>gene:ENSG00000100142 /// Homo sapiens polymerase (RNA) II (DNA directed) polypeptide F, mRNA (cDNA clone MGC:2669 IMAGE:3546712), complete cds. /// Homo sapiens polymerase (RNA) II (DNA directed) polypeptide F (POLR2F), mRNA.                                                                                                                                                                                                                                                 | polymerase (RNA) II (DNA directed) polypeptide F | 0.002220<br>047 | 1.202293<br>818      |
| ZNF486 | Zinc finger protein 486<br>gene:ENSG00000160229 /// Homo sapiens zinc finger protein 486, mRNA (cDNA clone IMAGE:4829685), partial cds. /// Homo sapiens zinc finger protein 486 (ZNF486), mRNA.                                                                                                                                                                                                                                                                                                                                                                                                                             | zinc finger protein 486                          | 0.002249<br>4   | -<br>1.160571<br>819 |

|             |                                                                                                                                                                                                                                                                                                                                                                                                                                                                                                                                                                                                                                                                                                                                                                                                                                                                                                                                                                                                                                                                                                                                     |                                          |                         |                               |
|-------------|-------------------------------------------------------------------------------------------------------------------------------------------------------------------------------------------------------------------------------------------------------------------------------------------------------------------------------------------------------------------------------------------------------------------------------------------------------------------------------------------------------------------------------------------------------------------------------------------------------------------------------------------------------------------------------------------------------------------------------------------------------------------------------------------------------------------------------------------------------------------------------------------------------------------------------------------------------------------------------------------------------------------------------------------------------------------------------------------------------------------------------------|------------------------------------------|-------------------------|-------------------------------|
| <p>ATF3</p> | <p>Isoform 1 of Cyclic AMP-dependent transcription factor ATF-3<br/> gene:ENSG00000162772 /// Isoform 1 of Cyclic AMP-dependent transcription factor ATF-3<br/> gene:ENSG00000162772 /// activating transcription factor 3 isoform 2<br/> gene:ENSG00000162772 /// Activating transcription factor 3 delta<br/> Zip3 gene:ENSG00000162772 /// Activating transcription factor 3<br/> gene:ENSG00000162772 /// Activating transcription factor 3 delta<br/> Zip2c gene:ENSG00000162772 /// activating transcription factor 3<br/> isoform 2 gene:ENSG00000162772 /// Activating transcription factor 3<br/> delta Zip2c gene:ENSG00000162772 /// Homo sapiens mRNA for activating<br/> transcription factor 3 long isoform variant protein. /// Homo sapiens<br/> activating transcription factor 3 (ATF3), transcript variant 1, mRNA.<br/> /// Homo sapiens activating transcription factor 3 (ATF3), transcript<br/> variant 3, mRNA. /// Homo sapiens activating transcription factor 3<br/> (ATF3), transcript variant 2, mRNA. /// Homo sapiens activating<br/> transcription factor 3 (ATF3), transcript variant 4, mRNA.</p> | <p>activating transcription factor 3</p> | <p>0.000737<br/>282</p> | <p>-<br/>1.356703<br/>295</p> |
|-------------|-------------------------------------------------------------------------------------------------------------------------------------------------------------------------------------------------------------------------------------------------------------------------------------------------------------------------------------------------------------------------------------------------------------------------------------------------------------------------------------------------------------------------------------------------------------------------------------------------------------------------------------------------------------------------------------------------------------------------------------------------------------------------------------------------------------------------------------------------------------------------------------------------------------------------------------------------------------------------------------------------------------------------------------------------------------------------------------------------------------------------------------|------------------------------------------|-------------------------|-------------------------------|

|        |                                                                                                                                                                                                                                                                                                                                                                                                                                                                                                                                                                                  |                                           |                 |                 |
|--------|----------------------------------------------------------------------------------------------------------------------------------------------------------------------------------------------------------------------------------------------------------------------------------------------------------------------------------------------------------------------------------------------------------------------------------------------------------------------------------------------------------------------------------------------------------------------------------|-------------------------------------------|-----------------|-----------------|
| FANCL  | Putative uncharacterized protein FANCL gene:ENSG00000115392 /// E3 ubiquitin-protein ligase FANCL gene:ENSG00000115392 /// Fanconi anemia, complementation group L isoform 1 gene:ENSG00000115392 /// Putative uncharacterized protein FANCL gene:ENSG00000115392 /// Homo sapiens Fanconi anemia, complementation group L, mRNA (cDNA clone MGC:60295 IMAGE:5180184), complete cds. /// Homo sapiens Fanconi anemia, complementation group L (FANCL), transcript variant 2, mRNA. /// Homo sapiens Fanconi anemia, complementation group L (FANCL), transcript variant 1, mRNA. | Fanconi anemia, complementation group L   | 0.006341<br>69  | 1.239930<br>586 |
| NSMCE1 | Non-structural maintenance of chromosomes element 1 homolog gene:ENSG00000169189 /// Putative uncharacterized protein NSMCE1 (Fragment) gene:ENSG00000169189 /// Homo sapiens cDNA FLJ32233 fis, clone PLACE6004663. /// Homo sapiens non-SMC element 1 homolog (S. cerevisiae) (NSMCE1), mRNA.                                                                                                                                                                                                                                                                                  | non-SMC element 1 homolog (S. cerevisiae) | 0.005526<br>628 | 1.158631<br>589 |
| TBL1X  | transducin beta-like 1X isoform a gene:ENSG00000101849 /// F-box-like/WD repeat-containing protein TBL1X gene:ENSG00000101849 /// transducin beta-like 1X isoform a gene:ENSG00000101849 /// Homo sapiens transducin (beta)-like 1X-linked, mRNA (cDNA clone MGC:45225 IMAGE:5496758), complete cds. /// Homo sapiens transducin (beta)-like 1X-linked (TBL1X), mRNA.                                                                                                                                                                                                            | transducin (beta)-like 1X-linked          | 0.002114<br>75  | 1.234673<br>068 |

|        |                                                                                                                                                                                                                                                                                                                                                                                                                                                                                                                                                                                                                                                                                                                          |                                                                      |                 |                      |
|--------|--------------------------------------------------------------------------------------------------------------------------------------------------------------------------------------------------------------------------------------------------------------------------------------------------------------------------------------------------------------------------------------------------------------------------------------------------------------------------------------------------------------------------------------------------------------------------------------------------------------------------------------------------------------------------------------------------------------------------|----------------------------------------------------------------------|-----------------|----------------------|
| GTF3C1 | Putative uncharacterized protein<br>GTF3C1 gene:ENSG00000077235 ///<br>Isoform 1 of General transcription<br>factor 3C polypeptide 1<br>gene:ENSG00000077235 /// GTF3C1<br>protein gene:ENSG00000077235 ///<br>Homo sapiens general transcription<br>factor IIIC, polypeptide 1, alpha<br>220kDa, mRNA (cDNA clone<br>MGC:168849 IMAGE:9021226),<br>complete cds. /// Homo sapiens<br>general transcription factor IIIC,<br>polypeptide 1, alpha 220kDa<br>(GTF3C1), mRNA.                                                                                                                                                                                                                                               | general transcription<br>factor IIIC, polypeptide<br>1, alpha 220kDa | 0.009933<br>241 | -<br>1.140062<br>433 |
| PSIP1  | Isoform 1 of PC4 and SFRS1-<br>interacting protein<br>gene:ENSG00000164985 /// Isoform<br>1 of PC4 and SFRS1-interacting<br>protein gene:ENSG00000164985 ///<br>PSIP1 protein<br>gene:ENSG00000164985 /// PSIP1<br>protein gene:ENSG00000164985 ///<br>Isoform 2 of PC4 and SFRS1-<br>interacting protein<br>gene:ENSG00000164985 /// Homo<br>sapiens lens epithelium-derived<br>growth factor mRNA, complete cds.<br>/// Homo sapiens PC4 and SFRS1<br>interacting protein 1 (PSIP1),<br>transcript variant 2, mRNA. /// Homo<br>sapiens PC4 and SFRS1 interacting<br>protein 1 (PSIP1), transcript variant 1,<br>mRNA. /// Homo sapiens PC4 and<br>SFRS1 interacting protein 1 (PSIP1),<br>transcript variant 3, mRNA. | PC4 and SFRS1<br>interacting protein 1                               | 0.002345<br>201 | 1.189283<br>64       |
| ACTL6A | Isoform 2 of Actin-like protein 6A<br>gene:ENSG00000136518 /// Isoform<br>1 of Actin-like protein 6A<br>gene:ENSG00000136518 /// Homo<br>sapiens actin-like 6A, mRNA (cDNA<br>clone MGC:26443 IMAGE:4827785),<br>complete cds. /// Homo sapiens<br>actin-like 6A (ACTL6A), transcript<br>variant 1, mRNA. /// Homo sapiens<br>actin-like 6A (ACTL6A), transcript<br>variant 2, mRNA. /// Homo sapiens<br>actin-like 6A (ACTL6A), transcript<br>variant 3, mRNA.                                                                                                                                                                                                                                                          | actin-like 6A                                                        | 0.005685<br>442 | 1.184736<br>011      |

|        |                                                                                                                                                                                                                                                                                                                                                                            |                                                                   |             |              |
|--------|----------------------------------------------------------------------------------------------------------------------------------------------------------------------------------------------------------------------------------------------------------------------------------------------------------------------------------------------------------------------------|-------------------------------------------------------------------|-------------|--------------|
| TFAP4  | Transcription factor AP-4 (Activating enhancer binding protein 4) variant (Fragment) gene:ENSG00000090447 /// Transcription factor AP-4 gene:ENSG00000090447 /// AP-4=basic helix-loop-helix DNA-binding protein [human, cervical carcinoma, HeLa cells, mRNA, 2149 nt]. /// Homo sapiens transcription factor AP-4 (activating enhancer binding protein 4) (TFAP4), mRNA. | transcription factor AP-4 (activating enhancer binding protein 4) | 0.005101753 | 1.227006686  |
| ZNF440 | Zinc finger protein 440 gene:ENSG00000171295 /// Homo sapiens zinc finger protein 440, mRNA (cDNA clone MGC:46665 IMAGE:5556302), complete cds. /// Homo sapiens zinc finger protein 440 (ZNF440), mRNA.                                                                                                                                                                   | zinc finger protein 440                                           | 0.008568226 | -1.235795754 |
| ZMAT3  | Zinc finger matrin-type protein 3 gene:ENSG00000172667 /// Homo sapiens zinc finger, matrin type 3, mRNA (cDNA clone MGC:10613 IMAGE:3943641), complete cds. /// Homo sapiens zinc finger, matrin type 3 (ZMAT3), transcript variant 2, mRNA. /// Homo sapiens zinc finger, matrin type 3 (ZMAT3), transcript variant 1, mRNA.                                             | zinc finger, matrin type 3                                        | 0.003712906 | -1.21206409  |
| SP4    | Transcription factor Sp4 gene:ENSG00000105866 /// Homo sapiens cDNA FLJ76740 complete cds, highly similar to Homo sapiens Sp4 transcription factor (SP4), mRNA. /// Homo sapiens Sp4 transcription factor (SP4), mRNA.                                                                                                                                                     | Sp4 transcription factor                                          | 0.001577765 | 1.183771619  |
| ZBTB25 | Zinc finger and BTB domain-containing protein 25 gene:ENSG00000089775 /// Zinc finger and BTB domain-containing protein 25 gene:ENSG00000089775 /// Homo sapiens zinc finger and BTB domain containing 25, mRNA (cDNA clone MGC:46128 IMAGE:5745935), complete cds. /// Homo sapiens zinc finger and BTB domain containing 25 (ZBTB25), mRNA.                              | zinc finger and BTB domain containing 25                          | 0.008132439 | 1.220112727  |

|               |                                                                                                                                                                                                                                                                                                                                                                                                                                                                                                                                                                                                                                                                                                                                                                                                                                                                                                                                                                                                                                                                                                                                                                                                                                      |                                                                       |                         |                         |
|---------------|--------------------------------------------------------------------------------------------------------------------------------------------------------------------------------------------------------------------------------------------------------------------------------------------------------------------------------------------------------------------------------------------------------------------------------------------------------------------------------------------------------------------------------------------------------------------------------------------------------------------------------------------------------------------------------------------------------------------------------------------------------------------------------------------------------------------------------------------------------------------------------------------------------------------------------------------------------------------------------------------------------------------------------------------------------------------------------------------------------------------------------------------------------------------------------------------------------------------------------------|-----------------------------------------------------------------------|-------------------------|-------------------------|
| <p>TRIM13</p> | <p>Isoform Alpha of Tripartite motif-containing protein 13<br/> gene:ENSG00000204977 /// ret finger protein 2 isoform 2<br/> gene:ENSG00000204977 /// Isoform Alpha of Tripartite motif-containing protein 13<br/> gene:ENSG00000204977 /// Isoform Alpha of Tripartite motif-containing protein 13<br/> gene:ENSG00000204977 /// Isoform 2 of Putative potassium channel regulatory protein<br/> gene:ENSG00000198553 /// Isoform 1 of Putative potassium channel regulatory protein<br/> gene:ENSG00000198553 /// Homo sapiens putative potassium channel proteins regulator protein variant A (KCNRG) mRNA, complete cds; alternatively spliced. /// Homo sapiens leu5 (RFP2) mRNA, complete cds. /// Homo sapiens potassium channel regulator (KCNRG), transcript variant 1, mRNA. /// Homo sapiens tripartite motif-containing 13 (TRIM13), transcript variant 4, mRNA. /// Homo sapiens potassium channel regulator (KCNRG), transcript variant 2, mRNA. /// Homo sapiens tripartite motif-containing 13 (TRIM13), transcript variant 1, mRNA. /// Homo sapiens tripartite motif-containing 13 (TRIM13), transcript variant 2, mRNA. /// Homo sapiens tripartite motif-containing 13 (TRIM13), transcript variant 3, mRNA.</p> | <p>potassium channel regulator /// tripartite motif-containing 13</p> | <p>0.008562<br/>401</p> | <p>1.232643<br/>517</p> |
|---------------|--------------------------------------------------------------------------------------------------------------------------------------------------------------------------------------------------------------------------------------------------------------------------------------------------------------------------------------------------------------------------------------------------------------------------------------------------------------------------------------------------------------------------------------------------------------------------------------------------------------------------------------------------------------------------------------------------------------------------------------------------------------------------------------------------------------------------------------------------------------------------------------------------------------------------------------------------------------------------------------------------------------------------------------------------------------------------------------------------------------------------------------------------------------------------------------------------------------------------------------|-----------------------------------------------------------------------|-------------------------|-------------------------|



|           |                                                                                                                                                                                                                                                                                                                                                                                                                                                                                                                                                                                                                                                                                                                                                                         |                                                                 |                 |                      |
|-----------|-------------------------------------------------------------------------------------------------------------------------------------------------------------------------------------------------------------------------------------------------------------------------------------------------------------------------------------------------------------------------------------------------------------------------------------------------------------------------------------------------------------------------------------------------------------------------------------------------------------------------------------------------------------------------------------------------------------------------------------------------------------------------|-----------------------------------------------------------------|-----------------|----------------------|
| MAP3K7IP3 | Isoform 1 of Mitogen-activated protein kinase kinase kinase 7-interacting protein 3<br>gene:ENSG00000157625 /// Isoform 1 of Mitogen-activated protein kinase kinase kinase 7-interacting protein 3<br>gene:ENSG00000157625 /// Isoform 1 of Mitogen-activated protein kinase kinase kinase 7-interacting protein 3<br>gene:ENSG00000157625 /// cDNA FLJ60687, highly similar to Mitogen-activated protein kinase kinase kinase7-interacting protein 3<br>gene:ENSG00000157625 /// Putative uncharacterized protein MAP3K7IP3<br>gene:ENSG00000157625 /// Homo sapiens NFkB activating protein 1 isoform A (TAB3) mRNA, complete cds, alternatively spliced. /// Homo sapiens mitogen-activated protein kinase kinase kinase 7 interacting protein 3 (MAP3K7IP3), mRNA. | mitogen-activated protein kinase kinase 7 interacting protein 3 | 0.003752<br>719 | -<br>1.210958<br>631 |
| DZIP3     | Isoform 2 of E3 ubiquitin-protein ligase DZIP3<br>gene:ENSG00000198919 /// Isoform 1 of E3 ubiquitin-protein ligase DZIP3<br>gene:ENSG00000198919 /// Homo sapiens DAZ interacting protein 3, zinc finger, mRNA (cDNA clone MGC:75477 IMAGE:30387514), complete cds. /// Homo sapiens DAZ interacting protein 3, zinc finger (DZIP3), mRNA.                                                                                                                                                                                                                                                                                                                                                                                                                             | DAZ interacting protein 3, zinc finger                          | 0.000680<br>286 | -<br>1.196710<br>337 |
| MYOCD     | cDNA FLJ78477, highly similar to Homo sapiens myocardin<br>gene:ENSG00000141052 /// Putative uncharacterized protein DKFZp686O15128<br>gene:ENSG00000141052 /// Isoform 1 of Myocardin<br>gene:ENSG00000141052 /// Isoform 2 of Myocardin<br>gene:ENSG00000141052 /// Homo sapiens myocardin mRNA, complete cds, alternatively spliced. /// Homo sapiens myocardin (MYOCD), mRNA.                                                                                                                                                                                                                                                                                                                                                                                       | myocardin                                                       | 0.001318<br>582 | -<br>1.320402<br>281 |

|         |                                                                                                                                                                                                                                                                                                                                                                                                                                                                                                                                                                                                                                                                                                                                                                                                              |                                      |                 |                      |
|---------|--------------------------------------------------------------------------------------------------------------------------------------------------------------------------------------------------------------------------------------------------------------------------------------------------------------------------------------------------------------------------------------------------------------------------------------------------------------------------------------------------------------------------------------------------------------------------------------------------------------------------------------------------------------------------------------------------------------------------------------------------------------------------------------------------------------|--------------------------------------|-----------------|----------------------|
| TRIM14  | Isoform Alpha of Tripartite motif-containing protein 14 gene:ENSG00000106785 /// Isoform Beta of Tripartite motif-containing protein 14 gene:ENSG00000106785 /// Isoform Alpha of Tripartite motif-containing protein 14 gene:ENSG00000106785 /// Isoform Alpha of Tripartite motif-containing protein 14 gene:ENSG00000106785 /// Tripartite motif protein TRIM14 alpha gene:ENSG00000106785 /// Homo sapiens mRNA for KIAA0129 gene, complete cds. /// Homo sapiens tripartite motif-containing 14 (TRIM14), transcript variant 3, mRNA. /// Homo sapiens tripartite motif-containing 14 (TRIM14), transcript variant 4, mRNA. /// Homo sapiens tripartite motif-containing 14 (TRIM14), transcript variant 2, mRNA. /// Homo sapiens tripartite motif-containing 14 (TRIM14), transcript variant 1, mRNA. | tripartite motif-containing 14       | 0.006973<br>195 | -<br>1.185822<br>344 |
| ZC3H11A | Zinc finger CCCH domain-containing protein 11A gene:ENSG00000058673 /// Homo sapiens zinc finger CCCH-type containing 11A, mRNA (cDNA clone IMAGE:5262797). /// Homo sapiens zinc finger CCCH-type containing 11A (ZC3H11A), mRNA.                                                                                                                                                                                                                                                                                                                                                   | zinc finger CCCH-type containing 11A | 0.587235<br>771 | 1.027739<br>519      |
| HMG20A  | Isoform 1 of High mobility group protein 20A gene:ENSG00000140382 /// Isoform 1 of High mobility group protein 20A gene:ENSG00000140382 /// Homo sapiens high-mobility group 20A, mRNA (cDNA clone MGC:8813 IMAGE:3908842), complete cds. /// Homo sapiens high-mobility group 20A (HMG20A), mRNA.                                                                                                                                                                                                                                                                                                                                                                                                                                                                                                           | high-mobility group 20A              | 0.008452<br>154 | 1.152143<br>821      |

|        |                                                                                                                                                                                                                                                                                                                                                                                                                                                                                                        |                                    |                 |                      |
|--------|--------------------------------------------------------------------------------------------------------------------------------------------------------------------------------------------------------------------------------------------------------------------------------------------------------------------------------------------------------------------------------------------------------------------------------------------------------------------------------------------------------|------------------------------------|-----------------|----------------------|
| TRAIP  | TRAF-interacting protein<br>gene:ENSG00000183763 /// Homo sapiens TRAF interacting protein, mRNA (cDNA clone MGC:3999 IMAGE:2821007), complete cds. /// Homo sapiens TRAF interacting protein (TRAIP), mRNA.                                                                                                                                                                                                                                                                                           | TRAF interacting protein           | 0.004638<br>021 | 1.182918<br>593      |
| ZC3H6  | cdna:known<br>chromosome:NCBI36:2:112749642:112814105:1 gene:ENSG00000188177 /// Zinc finger CCCH domain-containing protein 6<br>gene:ENSG00000188177 /// Homo sapiens zinc finger CCCH-type containing 6 (ZC3H6), mRNA.                                                                                                                                                                                                                                                                               | zinc finger CCCH-type containing 6 | 0.005746<br>652 | 1.300183<br>92       |
| PHF21B | Isoform 2 of PHD finger protein 21B<br>gene:ENSG00000056487 /// PHD finger protein 21B, isoform CRA_c<br>gene:ENSG00000056487 /// Isoform 1 of PHD finger protein 21B<br>gene:ENSG00000056487 /// 46 kDa protein<br>gene:ENSG00000056487 /// Homo sapiens PHD finger protein 21B, mRNA (cDNA clone MGC:20476 IMAGE:4634631), complete cds. /// Homo sapiens PHD finger protein 21B (PHF21B), transcript variant 1, mRNA. /// Homo sapiens PHD finger protein 21B (PHF21B), transcript variant 2, mRNA. | PHD finger protein 21B             | 0.000924<br>157 | -<br>1.245954<br>349 |

|       |                                                                                                                                                                                                                                                                                                                                                                                                                                                                                                                                                                                                                                                     |                                   |             |              |
|-------|-----------------------------------------------------------------------------------------------------------------------------------------------------------------------------------------------------------------------------------------------------------------------------------------------------------------------------------------------------------------------------------------------------------------------------------------------------------------------------------------------------------------------------------------------------------------------------------------------------------------------------------------------------|-----------------------------------|-------------|--------------|
| BRDT  | <p>Isoform 2 of Bromodomain testis-specific protein<br/> gene:ENSG00000137948 /// Isoform 1 of Bromodomain testis-specific protein<br/> gene:ENSG00000137948 /// Isoform 2 of Bromodomain testis-specific protein<br/> gene:ENSG00000137948 /// Isoform 1 of Bromodomain testis-specific protein<br/> gene:ENSG00000137948 /// Isoform 1 of Bromodomain testis-specific protein<br/> gene:ENSG00000137948 /// Homo sapiens testis-specific BRDT protein mRNA, complete cds. /// Homo sapiens bromodomain, testis-specific (BRDT), transcript variant 2, mRNA. /// Homo sapiens bromodomain, testis-specific (BRDT), transcript variant 1, mRNA.</p> | bromodomain, testis-specific      | 4.80202E-05 | -1.685988704 |
| MORC4 | <p>MORC family CW-type zinc finger protein 4<br/> gene:ENSG00000133131 /// zinc finger, CW type with coiled-coil domain 2 isoform b<br/> gene:ENSG00000133131 /// MORC family CW-type zinc finger protein 4<br/> gene:ENSG00000133131 /// Homo sapiens clone IMAGE: IMGCL030344723 MORC family CW-type zinc finger protein 4 (MORC4) mRNA, complete cds, alternatively spliced. /// Homo sapiens MORC family CW-type zinc finger 4 (MORC4), transcript variant 1, mRNA. /// Homo sapiens MORC family CW-type zinc finger 4 (MORC4), transcript variant 2, mRNA.</p>                                                                                 | MORC family CW-type zinc finger 4 | 0.00331424  | -1.332075391 |

|         |                                                                                                                                                                                                                                                                                                                                                                                                                                                                                                                                                                                                                                                                                                                                                                                                                                                                                                                                                              |                                                                                                   |                 |                 |
|---------|--------------------------------------------------------------------------------------------------------------------------------------------------------------------------------------------------------------------------------------------------------------------------------------------------------------------------------------------------------------------------------------------------------------------------------------------------------------------------------------------------------------------------------------------------------------------------------------------------------------------------------------------------------------------------------------------------------------------------------------------------------------------------------------------------------------------------------------------------------------------------------------------------------------------------------------------------------------|---------------------------------------------------------------------------------------------------|-----------------|-----------------|
| HDAC6   | <p>cDNA FLJ14021 fis, clone HEMBA1002513, highly similar to Histone deacetylase 6 (Fragment)<br/> gene:ENSG00000094631 /// cDNA FLJ14021 fis, clone HEMBA1002513, highly similar to Histone deacetylase 6 (Fragment)<br/> gene:ENSG00000094631 /// cDNA FLJ56474, highly similar to Histone deacetylase 6<br/> gene:ENSG00000094631 /// cDNA FLJ56474, highly similar to Histone deacetylase 6<br/> gene:ENSG00000094631 /// Homo sapiens histone deacetylase 6, mRNA (cDNA clone MGC:78509 IMAGE:6584427), complete cds. /// Homo sapiens histone deacetylase 6 (HDAC6), mRNA.</p>                                                                                                                                                                                                                                                                                                                                                                          | histone deacetylase 6                                                                             | 0.001852<br>969 | 1.237739<br>731 |
| SMARCB1 | <p>Isoform A of SWI/SNF-related matrix-associated actin-dependent regulator of chromatin subfamily B member 1<br/> gene:ENSG00000099956 /// cDNA FLJ13963 fis, clone Y79AA1001299, highly similar to Homo sapiens integrase interactor 1b protein<br/> gene:ENSG00000099956 /// Isoform B of SWI/SNF-related matrix-associated actin-dependent regulator of chromatin subfamily B member 1<br/> gene:ENSG00000099956 /// Putative uncharacterized protein SMARCB1<br/> gene:ENSG00000099956 /// Homo sapiens cDNA FLJ13963 fis, clone Y79AA1001299, highly similar to Homo sapiens mRNA for integrase interactor 1b protein (INI1B). /// Homo sapiens SWI/SNF related, matrix associated, actin dependent regulator of chromatin, subfamily b, member 1 (SMARCB1), transcript variant 1, mRNA. /// Homo sapiens SWI/SNF related, matrix associated, actin dependent regulator of chromatin, subfamily b, member 1 (SMARCB1), transcript variant 2, mRNA.</p> | SWI/SNF related, matrix associated, actin dependent regulator of chromatin, subfamily b, member 1 | 0.005212<br>506 | 1.159324<br>321 |

|        |                                                                                                                                                                                                                                                                                                                                                                                                                                                                                                                                                                                                                                            |                                              |                 |                      |
|--------|--------------------------------------------------------------------------------------------------------------------------------------------------------------------------------------------------------------------------------------------------------------------------------------------------------------------------------------------------------------------------------------------------------------------------------------------------------------------------------------------------------------------------------------------------------------------------------------------------------------------------------------------|----------------------------------------------|-----------------|----------------------|
| ZBTB5  | Zinc finger and BTB domain-containing protein 5<br>gene:ENSG00000168795 /// Homo sapiens cDNA FLJ77230 complete cds, highly similar to Homo sapiens zinc finger and BTB domain containing 5 (ZBTB5), mRNA. /// Homo sapiens zinc finger and BTB domain containing 5 (ZBTB5), mRNA.                                                                                                                                                                                                                                                                                                                                                         | zinc finger and BTB domain containing 5      | 0.002886<br>046 | -<br>1.255032<br>589 |
| ZRANB3 | Isoform 2 of Zinc finger Ran-binding domain-containing protein 3<br>gene:ENSG00000121988 /// Isoform 2 of Zinc finger Ran-binding domain-containing protein 3<br>gene:ENSG00000121988 /// Isoform 1 of Zinc finger Ran-binding domain-containing protein 3<br>gene:ENSG00000121988 /// Isoform 1 of Zinc finger Ran-binding domain-containing protein 3<br>gene:ENSG00000121988 /// cDNA FLJ38043 fis, clone CTONG2014058, weakly similar to HepA-related protein gene:ENSG00000121988 /// Homo sapiens mRNA; cDNA DKFZp686D0128 (from clone DKFZp686D0128). /// Homo sapiens zinc finger, RAN-binding domain containing 3 (ZRANB3), mRNA. | zinc finger, RAN-binding domain containing 3 | 0.060927<br>073 | 1.149254<br>077      |
| HELZ   | Probable helicase with zinc finger domain gene:ENSG00000198265 /// Homo sapiens helicase with zinc finger, mRNA (cDNA clone MGC:163454 IMAGE:40146613), complete cds. /// Homo sapiens helicase with zinc finger (HELZ), mRNA.                                                                                                                                                                                                                                                                                                                                                                                                             | helicase with zinc finger                    | 1.11093E<br>-07 | -<br>1.384436<br>629 |

|         |                                                                                                                                                                                                                                                                                                                                                                                                                                                                                                                                |                                                    |                 |                      |
|---------|--------------------------------------------------------------------------------------------------------------------------------------------------------------------------------------------------------------------------------------------------------------------------------------------------------------------------------------------------------------------------------------------------------------------------------------------------------------------------------------------------------------------------------|----------------------------------------------------|-----------------|----------------------|
| ZNF385A | zinc finger protein 385A isoform b<br>gene:ENSG00000161642 /// Isoform 1 of Zinc finger protein 385A<br>gene:ENSG00000161642 /// Isoform 1 of Zinc finger protein 385A<br>gene:ENSG00000161642 /// Homo sapiens hematopoietic zinc finger protein (HZF) mRNA, complete cds. /// Homo sapiens zinc finger protein 385A (ZNF385A), transcript variant 1, mRNA. /// Homo sapiens zinc finger protein 385A (ZNF385A), transcript variant 2, mRNA. /// Homo sapiens zinc finger protein 385A (ZNF385A), transcript variant 3, mRNA. | zinc finger protein 385A                           | 0.006703<br>349 | -<br>1.184322<br>958 |
| FOXJ1   | Forkhead box protein J1<br>gene:ENSG00000129654 /// Homo sapiens forkhead box J1, mRNA (cDNA clone MGC:35202 IMAGE:5171637), complete cds. /// Homo sapiens forkhead box J1 (FOXJ1), mRNA.                                                                                                                                                                                                                                                                                                                                     | forkhead box J1                                    | 0.000604<br>848 | -<br>1.290465<br>848 |
| LCORL   | Isoform 3 of Ligand-dependent nuclear receptor corepressor-like protein gene:ENSG00000178177 /// Isoform 1 of Ligand-dependent nuclear receptor corepressor-like protein gene:ENSG00000178177 /// Isoform 1 of Ligand-dependent nuclear receptor corepressor-like protein gene:ENSG00000178177 /// Homo sapiens ligand dependent nuclear receptor corepressor-like, mRNA (cDNA clone MGC:43101 IMAGE:5260413), complete cds. /// Homo sapiens ligand dependent nuclear receptor corepressor-like (LCORL), mRNA.                | ligand dependent nuclear receptor corepressor-like | 0.007581<br>431 | 1.212379<br>527      |

|       |                                                                                                                                                                                                                                                                                                                                                                                                                                                                                                                                                            |                                      |                 |                      |
|-------|------------------------------------------------------------------------------------------------------------------------------------------------------------------------------------------------------------------------------------------------------------------------------------------------------------------------------------------------------------------------------------------------------------------------------------------------------------------------------------------------------------------------------------------------------------|--------------------------------------|-----------------|----------------------|
| LMO3  | LIM domain only protein 3<br>gene:ENSG00000048540 /// Neuronal specific transcription factor DAT1<br>gene:ENSG00000048540 /// LIM domain only protein 3<br>gene:ENSG00000048540 /// Putative uncharacterized protein Nbla03267<br>gene:ENSG00000048540 /// Homo sapiens LIM domain only 3 (rhombotin-like 2), mRNA (cDNA clone MGC:26081 IMAGE:4799836), complete cds. /// Homo sapiens LIM domain only 3 (rhombotin-like 2) (LMO3), transcript variant 1, mRNA. /// Homo sapiens LIM domain only 3 (rhombotin-like 2) (LMO3), transcript variant 2, mRNA. | LIM domain only 3 (rhombotin-like 2) | 0.003242<br>393 | 1.343951<br>303      |
| NSBP1 | Nucleosome-binding protein 1<br>gene:ENSG00000198157 ///<br>Nucleosomal binding protein 1<br>gene:ENSG00000198157 ///<br>Nucleosomal binding protein 1<br>gene:ENSG00000198157 ///<br>Nucleosome-binding protein 1<br>gene:ENSG00000198157 /// Homo sapiens cDNA FLJ36739 fis, clone UTERU2013262. /// Homo sapiens nucleosomal binding protein 1 (NSBP1), mRNA.                                                                                                                                                                                           | nucleosomal binding protein 1        | 0.008542<br>632 | 1.222686<br>506      |
| E2F7  | Isoform 1 of Transcription factor E2F7<br>gene:ENSG00000165891 /// Putative uncharacterized protein E2F7<br>gene:ENSG00000165891 /// Homo sapiens E2F transcription factor 7, mRNA (cDNA clone MGC:167976 IMAGE:9020353), complete cds. /// Homo sapiens E2F transcription factor 7 (E2F7), mRNA.                                                                                                                                                                                                                                                          | E2F transcription factor 7           | 1.68088E<br>-05 | -<br>1.315656<br>104 |



|        |                                                                                                                                                                                                                                                                                                                                                                                                                                                        |                                                                |                 |                      |
|--------|--------------------------------------------------------------------------------------------------------------------------------------------------------------------------------------------------------------------------------------------------------------------------------------------------------------------------------------------------------------------------------------------------------------------------------------------------------|----------------------------------------------------------------|-----------------|----------------------|
| FMNL2  | cdna:known<br>chromosome:NCBI36:2:152899997:15<br>3214594:1 gene:ENSG00000157827<br>/// Isoform 3 of Formin-like protein 2<br>gene:ENSG00000157827 /// Homo<br>sapiens formin-like 2, mRNA (cDNA<br>clone MGC:176702 IMAGE:8862581),<br>complete cds. /// Homo sapiens<br>formin-like 2 (FMNL2), mRNA.                                                                                                                                                 | formin-like 2                                                  | 0.007124<br>974 | -<br>1.189287<br>247 |
| POLR2L | DNA-directed RNA polymerases I, II,<br>and III subunit RPABC5<br>gene:ENSG00000177700 /// Homo<br>sapiens polymerase (RNA) II (DNA<br>directed) polypeptide L, 7.6kDa,<br>mRNA (cDNA clone MGC:2137<br>IMAGE:2958832), complete cds. ///<br>Homo sapiens polymerase (RNA) II<br>(DNA directed) polypeptide L, 7.6kDa<br>(POLR2L), mRNA.                                                                                                                | polymerase (RNA) II<br>(DNA directed)<br>polypeptide L, 7.6kDa | 0.002227<br>826 | 1.192438<br>112      |
| NKX2-4 | Homeobox protein Nkx-2.4<br>gene:ENSG00000125816 /// Homo<br>sapiens NK2 homeobox 4 (NKX2-4),<br>mRNA.                                                                                                                                                                                                                                                                                                                                                 | NK2 homeobox 4                                                 | 0.000665<br>485 | -<br>1.265204<br>559 |
| TXNIP  | Thioredoxin-interacting protein<br>gene:ENSG00000117289 /// Homo<br>sapiens brain-expressed HHCPA78<br>homolog VDUP1 (Gene) mRNA,<br>complete cds. /// Homo sapiens<br>thioredoxin interacting protein<br>(TXNIP), mRNA.                                                                                                                                                                                                                               | thioredoxin interacting<br>protein                             | 0.000113<br>579 | 1.270264<br>433      |
| PARP14 | PARP14 protein<br>gene:ENSG00000173193 /// poly<br>(ADP-ribose) polymerase family,<br>member 14 gene:ENSG00000173193<br>/// Isoform 1 of Poly [ADP-ribose]<br>polymerase 14<br>gene:ENSG00000173193 /// Isoform<br>5 of Poly [ADP-ribose] polymerase 14<br>gene:ENSG00000173193 /// Homo<br>sapiens mRNA; cDNA<br>DKFZp686O21109 (from clone<br>DKFZp686O21109). /// Homo sapiens<br>poly (ADP-ribose) polymerase family,<br>member 14 (PARP14), mRNA. | poly (ADP-ribose)<br>polymerase family,<br>member 14           | 0.004544<br>963 | -<br>1.202786<br>113 |

|        |                                                                                                                                                                                                                                                                                                                                                                                                                                                                                                                                                                                                                                                                                                                                                                                                                                                                                                 |                                            |                 |                      |
|--------|-------------------------------------------------------------------------------------------------------------------------------------------------------------------------------------------------------------------------------------------------------------------------------------------------------------------------------------------------------------------------------------------------------------------------------------------------------------------------------------------------------------------------------------------------------------------------------------------------------------------------------------------------------------------------------------------------------------------------------------------------------------------------------------------------------------------------------------------------------------------------------------------------|--------------------------------------------|-----------------|----------------------|
| SCML1  | <p>Sex comb on midleg-like protein 1<br/> gene:ENSG00000047634 /// Sex<br/> comb on midleg-like protein 1<br/> gene:ENSG00000047634 /// sex comb<br/> on midleg-like 1 isoform b<br/> gene:ENSG00000047634 /// sex comb<br/> on midleg-like 1 isoform a<br/> gene:ENSG00000047634 /// Sex<br/> comb on midleg-like protein 1<br/> gene:ENSG00000047634 /// Homo<br/> sapiens mRNA; cDNA<br/> DKFZp686H0231 (from clone<br/> DKFZp686H0231). /// Homo sapiens<br/> sex comb on midleg-like 1<br/> (Drosophila) (SCML1), transcript<br/> variant 2, mRNA. /// Homo sapiens<br/> sex comb on midleg-like 1<br/> (Drosophila) (SCML1), transcript<br/> variant 3, mRNA. /// Homo sapiens<br/> sex comb on midleg-like 1<br/> (Drosophila) (SCML1), transcript<br/> variant 4, mRNA. /// Homo sapiens<br/> sex comb on midleg-like 1<br/> (Drosophila) (SCML1), transcript<br/> variant 1, mRNA.</p> | sex comb on midleg-<br>like 1 (Drosophila) | 3.55161E<br>-05 | -<br>1.563168<br>667 |
| ZNF468 | <p>Isoform 1 of Zinc finger protein 468<br/> gene:ENSG00000204604 /// Isoform<br/> 2 of Zinc finger protein 468<br/> gene:ENSG00000204604 /// Homo<br/> sapiens zinc finger protein ZNF468.2<br/> mRNA, complete cds. /// Homo<br/> sapiens zinc finger protein 468<br/> (ZNF468), transcript variant 2, mRNA.<br/> /// Homo sapiens zinc finger protein<br/> 468 (ZNF468), transcript variant 1,<br/> mRNA.</p>                                                                                                                                                                                                                                                                                                                                                                                                                                                                                | zinc finger protein 468                    | 5.52971E<br>-05 | -<br>1.313398<br>464 |

|       |                                                                                                                                                                                                                                                                                                                                                                                                                                                                                                                                                                                                                                                                                                                                                                                                                                                                                                                                                                                                                                                                                                         |                                 |             |             |
|-------|---------------------------------------------------------------------------------------------------------------------------------------------------------------------------------------------------------------------------------------------------------------------------------------------------------------------------------------------------------------------------------------------------------------------------------------------------------------------------------------------------------------------------------------------------------------------------------------------------------------------------------------------------------------------------------------------------------------------------------------------------------------------------------------------------------------------------------------------------------------------------------------------------------------------------------------------------------------------------------------------------------------------------------------------------------------------------------------------------------|---------------------------------|-------------|-------------|
| ZNRD1 | <p>DNA-directed RNA polymerase I subunit RPA12<br/> gene:ENSG00000206429 /// DNA-directed RNA polymerase I subunit RPA12 gene:ENSG00000206429 /// DNA-directed RNA polymerase I subunit RPA12<br/> gene:ENSG00000206429 /// DNA-directed RNA polymerase I subunit RPA12 gene:ENSG00000206429 /// DNA-directed RNA polymerase I subunit RPA12<br/> gene:ENSG00000206502 /// DNA-directed RNA polymerase I subunit RPA12 gene:ENSG00000206502 /// DNA-directed RNA polymerase I subunit RPA12<br/> gene:ENSG00000206502 /// DNA-directed RNA polymerase I subunit RPA12 gene:ENSG00000206502 /// DNA-directed RNA polymerase I subunit RPA12<br/> gene:ENSG00000066379 /// DNA-directed RNA polymerase I subunit RPA12 gene:ENSG00000066379 /// DNA-directed RNA polymerase I subunit RPA12<br/> gene:ENSG00000066379 /// DNA-directed RNA polymerase I subunit RPA12 gene:ENSG00000066379 /// Homo sapiens unknown mRNA. /// Homo sapiens zinc ribbon domain containing 1 (ZNRD1), transcript variant a, mRNA. /// Homo sapiens zinc ribbon domain containing 1 (ZNRD1), transcript variant b, mRNA.</p> | zinc ribbon domain containing 1 | 0.022210689 | 1.223992444 |
|-------|---------------------------------------------------------------------------------------------------------------------------------------------------------------------------------------------------------------------------------------------------------------------------------------------------------------------------------------------------------------------------------------------------------------------------------------------------------------------------------------------------------------------------------------------------------------------------------------------------------------------------------------------------------------------------------------------------------------------------------------------------------------------------------------------------------------------------------------------------------------------------------------------------------------------------------------------------------------------------------------------------------------------------------------------------------------------------------------------------------|---------------------------------|-------------|-------------|

|         |                                                                                                                                                                                                                                                                                                                                                                                                                                                                                                                                                                                                              |                                                                           |                 |                      |
|---------|--------------------------------------------------------------------------------------------------------------------------------------------------------------------------------------------------------------------------------------------------------------------------------------------------------------------------------------------------------------------------------------------------------------------------------------------------------------------------------------------------------------------------------------------------------------------------------------------------------------|---------------------------------------------------------------------------|-----------------|----------------------|
| ALS2CR8 | Isoform 1 of Amyotrophic lateral sclerosis 2 chromosomal region candidate gene 8 protein gene:ENSG00000138380 /// Isoform 1 of Amyotrophic lateral sclerosis 2 chromosomal region candidate gene 8 protein gene:ENSG00000138380 /// Homo sapiens amyotrophic lateral sclerosis 2 (juvenile) chromosome region, candidate 8, mRNA (cDNA clone MGC:44837 IMAGE:4521845), complete cds. /// Homo sapiens amyotrophic lateral sclerosis 2 (juvenile) chromosome region, candidate 8 (ALS2CR8), mRNA. /// Homo sapiens amyotrophic lateral sclerosis 2 (juvenile) chromosome region, candidate 8 (ALS2CR8), mRNA. | amyotrophic lateral sclerosis 2 (juvenile) chromosome region, candidate 8 | 0.005081<br>142 | 1.390537<br>787      |
| MAFA    | v-maf musculoaponeurotic fibrosarcoma oncogene homolog A gene:ENSG00000182759 /// Homo sapiens v-maf musculoaponeurotic fibrosarcoma oncogene homolog A (avian) (MAFA), mRNA.                                                                                                                                                                                                                                                                                                                                                                                                                                | v-maf musculoaponeurotic fibrosarcoma oncogene homolog A (avian)          | 0.006853<br>041 | -<br>1.260242<br>866 |
| ANKRD1  | Ankyrin repeat domain-containing protein 1 gene:ENSG00000148677 /// Homo sapiens ankyrin repeat domain 1 (cardiac muscle), mRNA (cDNA clone MGC:27140 IMAGE:4245591), complete cds. /// Homo sapiens ankyrin repeat domain 1 (cardiac muscle) (ANKRD1), mRNA.                                                                                                                                                                                                                                                                                                                                                | ankyrin repeat domain 1 (cardiac muscle)                                  | 0.002642<br>587 | -<br>1.185271<br>645 |
| ZNF660  | Zinc finger protein 660 gene:ENSG00000144792 /// Homo sapiens zinc finger protein 660, mRNA (cDNA clone MGC:103985 IMAGE:30915393), complete cds. /// Homo sapiens zinc finger protein 660 (ZNF660), mRNA.                                                                                                                                                                                                                                                                                                                                                                                                   | zinc finger protein 660                                                   | 0.000553<br>86  | 1.348738<br>12       |

|        |                                                                                                                                                                                                                                                                                                                                                                     |                          |                 |                      |
|--------|---------------------------------------------------------------------------------------------------------------------------------------------------------------------------------------------------------------------------------------------------------------------------------------------------------------------------------------------------------------------|--------------------------|-----------------|----------------------|
| FEZF1  | Isoform 3 of Fez family zinc finger protein 1 gene:ENSG00000128610 /// Homo sapiens cDNA FLJ54502 complete cds, highly similar to Homo sapiens zinc finger protein 312-like (LOC389549), mRNA. /// Homo sapiens FEZ family zinc finger 1 (FEZF1), mRNA.                                                                                                             | FEZ family zinc finger 1 | 0.002294<br>603 | -<br>1.354659<br>296 |
| PHF20  | Isoform 1 of PHD finger protein 20 gene:ENSG00000025293 /// 18 kDa protein gene:ENSG00000025293 /// Isoform 2 of PHD finger protein 20 gene:ENSG00000025293 /// PHD finger protein 20 gene:ENSG00000025293 /// Homo sapiens PHD finger protein 20, mRNA (cDNA clone MGC:164895 IMAGE:40148074), complete cds. /// Homo sapiens PHD finger protein 20 (PHF20), mRNA. | PHD finger protein 20    | 0.001217<br>769 | 1.240176<br>021      |
| BTG2   | Protein BTG2 gene:ENSG00000159388 /// Human BTG2 (BTG2) mRNA, complete cds. /// Homo sapiens BTG family, member 2 (BTG2), mRNA.                                                                                                                                                                                                                                     | BTG family, member 2     | 0.000131<br>374 | -<br>1.338043<br>485 |
| ZNF790 | Zinc finger protein 790 gene:ENSG00000197863 /// Homo sapiens zinc finger protein 790, mRNA (cDNA clone IMAGE:6712908). /// Homo sapiens zinc finger protein 790 (ZNF790), mRNA.                                                                                                                                                                                    | zinc finger protein 790  | 0.001199<br>618 | -<br>1.239368<br>069 |

|        |                                                                                                                                                                                                                                                                                                                                                                                                                                                                                                                                                                                                                                  |                                                                                  |                 |                      |
|--------|----------------------------------------------------------------------------------------------------------------------------------------------------------------------------------------------------------------------------------------------------------------------------------------------------------------------------------------------------------------------------------------------------------------------------------------------------------------------------------------------------------------------------------------------------------------------------------------------------------------------------------|----------------------------------------------------------------------------------|-----------------|----------------------|
| MTA3   | 61 kDa protein<br>gene:ENSG00000057935 /// 61 kDa protein gene:ENSG00000057935 /// Isoform 2 of Metastasis-associated protein MTA3<br>gene:ENSG00000057935 /// Isoform 1 of Metastasis-associated protein MTA3 gene:ENSG00000057935 /// 59 kDa protein gene:ENSG00000057935 /// cdna:known<br>chromosome:NCBI36:2:42649382:42834704:1 gene:ENSG00000057935 /// Isoform 1 of Metastasis-associated protein MTA3<br>gene:ENSG00000057935 /// Homo sapiens cDNA FLJ45312 fis, clone BRHIP3005037, moderately similar to Metastasis-associated protein MTA1. /// Homo sapiens metastasis associated 1 family, member 3 (MTA3), mRNA. | metastasis associated 1 family, member 3                                         | 0.001439<br>493 | 1.188019<br>482      |
| ZNF559 | Zinc finger protein 559<br>gene:ENSG00000188321 /// Zinc finger protein 559<br>gene:ENSG00000188321 /// Homo sapiens zinc finger protein 559, mRNA (cDNA clone MGC:13105 IMAGE:3957973), complete cds. /// Homo sapiens zinc finger protein 559 (ZNF559), mRNA.                                                                                                                                                                                                                                                                                                                                                                  | zinc finger protein 559                                                          | 0.004642<br>251 | 1.173094<br>787      |
| TAF13  | cdna:known<br>supercontig::NT_113870:35367:37336:-1 gene:ENSG00000215719 /// Transcription initiation factor TFIID subunit 13 gene:ENSG00000197780 /// Homo sapiens TAF13 RNA polymerase II, TATA box binding protein (TBP)-associated factor, 18kDa, mRNA (cDNA clone MGC:150596 IMAGE:40123243), complete cds. /// Homo sapiens TAF13 RNA polymerase II, TATA box binding protein (TBP)-associated factor, 18kDa (TAF13), mRNA.                                                                                                                                                                                                | TAF13 RNA polymerase II, TATA box binding protein (TBP)-associated factor, 18kDa | 0.000303<br>924 | -<br>1.237284<br>517 |

|        |                                                                                                                                                                                                                                                                                                                                                                                                                                   |                                                                                               |                 |                      |
|--------|-----------------------------------------------------------------------------------------------------------------------------------------------------------------------------------------------------------------------------------------------------------------------------------------------------------------------------------------------------------------------------------------------------------------------------------|-----------------------------------------------------------------------------------------------|-----------------|----------------------|
| ZNF721 | zinc finger protein 721<br>gene:ENSG00000182903 /// Homo sapiens cDNA clone IMAGE:3882186, partial cds. /// Homo sapiens zinc finger protein 721 (ZNF721), mRNA.                                                                                                                                                                                                                                                                  | ATP-binding cassette, sub-family A (ABC1), member 11 (pseudogene) /// zinc finger protein 721 | 0.000544<br>553 | -<br>1.208580<br>354 |
| ZNF121 | Zinc finger protein 121<br>gene:ENSG00000197961 /// Homo sapiens cDNA FLJ59039 complete cds, highly similar to Homo sapiens zinc finger protein 121 (ZNF121), mRNA. /// Homo sapiens zinc finger protein 121 (ZNF121), mRNA.                                                                                                                                                                                                      | zinc finger protein 121                                                                       | 0.000947<br>076 | -<br>1.196408<br>101 |
| ZNF682 | Isoform 1 of Zinc finger protein 682<br>gene:ENSG00000197124 /// zinc finger protein 682 isoform 2<br>gene:ENSG00000197124 /// BC39498_2 gene:ENSG00000197124<br>/// Homo sapiens cDNA FLJ40845 fis, clone TRACH2014483, highly similar to Zinc finger protein 682. /// Homo sapiens zinc finger protein 682 (ZNF682), transcript variant 1, mRNA. /// Homo sapiens zinc finger protein 682 (ZNF682), transcript variant 2, mRNA. | zinc finger protein 682                                                                       | 1.03864E<br>-08 | -<br>1.503956<br>443 |
| ZNF542 | Zinc finger protein 542<br>gene:ENSG00000197025 /// Homo sapiens zinc finger protein 542, mRNA (cDNA clone MGC:105006 IMAGE:3078727), complete cds. /// Homo sapiens zinc finger protein 542 (ZNF542), non-coding RNA. /// Homo sapiens zinc finger protein 542 (ZNF542), non-coding RNA. /// Homo sapiens zinc finger protein 542 (ZNF542), non-coding RNA. /// Homo sapiens zinc finger protein 542 (ZNF542), non-coding RNA.   | zinc finger protein 542                                                                       | 0.006894<br>357 | -<br>1.196802<br>555 |

|           |                                                                                                                                                                                                                                                                                                                                       |                                                                                                       |             |                  |
|-----------|---------------------------------------------------------------------------------------------------------------------------------------------------------------------------------------------------------------------------------------------------------------------------------------------------------------------------------------|-------------------------------------------------------------------------------------------------------|-------------|------------------|
| NFE2L3    | Nuclear factor erythroid 2-related factor 3 gene:ENSG0000050344 /// Homo sapiens nuclear factor (erythroid-derived 2)-like 3, mRNA (cDNA clone MGC:87043 IMAGE:30347127), complete cds. /// Homo sapiens nuclear factor (erythroid-derived 2)-like 3 (NFE2L3), mRNA.                                                                  | nuclear factor (erythroid-derived 2)-like 3                                                           | 0.000711581 | 1.257435284      |
| PTOV1     | Isoform 2 of Prostate tumor overexpressed gene 1 protein gene:ENSG00000104960 /// Isoform 1 of Prostate tumor overexpressed gene 1 protein gene:ENSG00000104960 /// Homo sapiens cDNA FLJ25088 fis, clone CBL08845, highly similar to Homo sapiens PTOV1 (PTOV1) gene. /// Homo sapiens prostate tumor overexpressed 1 (PTOV1), mRNA. | prostate tumor overexpressed 1                                                                        | 0.00280995  | 1.191462401      |
| LOC339742 | full-length cDNA clone CS0DF033YF19 of Fetal brain of Homo sapiens (human). /// PREDICTED: Homo sapiens hypothetical protein LOC100134157 (LOC100134157), mRNA. /// PREDICTED: Homo sapiens similar to LOC339742 protein (LOC100134240), mRNA. /// PREDICTED: Homo sapiens hypothetical protein LOC339742 (LOC339742), mRNA.          | hypothetical protein LOC100134157 /// similar to LOC339742 protein /// hypothetical protein LOC339742 | 0.009613021 | -<br>1.206233407 |
| ZFP36L1   | Butyrate response factor 1 gene:ENSG00000185650 /// Homo sapiens cDNA FLJ14140 fis, clone MAMMA1002858, highly similar to Butyrate response factor 1. /// Homo sapiens zinc finger protein 36, C3H type-like 1 (ZFP36L1), mRNA.                                                                                                       | zinc finger protein 36, C3H type-like 1                                                               | 0.008789807 | 1.143767204      |



|        |                                                                                                                                                                                                                                                                                                                                                                                                    |                              |             |              |
|--------|----------------------------------------------------------------------------------------------------------------------------------------------------------------------------------------------------------------------------------------------------------------------------------------------------------------------------------------------------------------------------------------------------|------------------------------|-------------|--------------|
| JMJD1A | <p>cdna:known<br/> chromosome:NCBI36:2:86521435:86573350:1 gene:ENSG00000115548 /// JmjC domain-containing histone demethylation protein 2A gene:ENSG00000115548 ///</p> <p>cdna:known<br/> chromosome:NCBI36:2:86522095:86573350:1 gene:ENSG00000115548 /// Homo sapiens mRNA; cDNA DKFZp686B22109 (from clone DKFZp686B22109). /// Homo sapiens jumonji domain containing 1A (JMJD1A), mRNA.</p> | jumonji domain containing 1A | 0.008568719 | 1.175489124  |
| FOXG1  | <p>Forkhead box protein G1<br/> gene:ENSG00000176165 /// Forkhead box protein G1<br/> gene:ENSG00000176165 /// Homo sapiens forkhead box G1, mRNA (cDNA clone MGC:48322 IMAGE:5284335), complete cds. /// Homo sapiens forkhead box G1 (FOXG1), mRNA.</p>                                                                                                                                          | forkhead box G1              | 0.001909934 | -1.280015942 |
| ZNF383 | <p>Zinc finger protein 383<br/> gene:ENSG00000188283 /// Zinc finger protein 383<br/> gene:ENSG00000188283 /// Homo sapiens zinc finger protein 383 mRNA, complete cds. /// Homo sapiens zinc finger protein 383 (ZNF383), mRNA.</p>                                                                                                                                                               | zinc finger protein 383      | 1.82504E-05 | -1.373579211 |
| ZNF600 | <p>Zinc finger protein 600<br/> gene:ENSG00000189190 /// 14 kDa protein gene:ENSG00000189190 /// Human zinc finger protein (kr-znf1) mRNA, partial cds. /// Homo sapiens zinc finger protein 600 (ZNF600), mRNA.</p>                                                                                                                                                                               | zinc finger protein 600      | 0.000129022 | -1.335911933 |

|        |                                                                                                                                                                                                                                                                                                                                                                                                                                                                                                                                                                                                                                                                                                                                                             |                                                  |             |              |
|--------|-------------------------------------------------------------------------------------------------------------------------------------------------------------------------------------------------------------------------------------------------------------------------------------------------------------------------------------------------------------------------------------------------------------------------------------------------------------------------------------------------------------------------------------------------------------------------------------------------------------------------------------------------------------------------------------------------------------------------------------------------------------|--------------------------------------------------|-------------|--------------|
| TES    | <p>Isoform 1 of Testin<br/> gene:ENSG00000135269 /// Isoform 2 of Testin gene:ENSG00000135269 /// 48 kDa protein<br/> gene:ENSG00000135269 /// Isoform 2 of Testin gene:ENSG00000135269 /// Homo sapiens TESTIN 2 mRNA, complete cds. /// Homo sapiens testis derived transcript (3 LIM domains) (TES), transcript variant 2, mRNA. /// Homo sapiens testis derived transcript (3 LIM domains) (TES), transcript variant 1, mRNA.</p>                                                                                                                                                                                                                                                                                                                       | testis derived transcript (3 LIM domains)        | 0.003543198 | -1.142458099 |
| CHN1   | <p>cdna:known<br/> chromosome:NCBI36:2:175372337:175578200:-1 gene:ENSG00000128656 /// Isoform Alpha-2 of N-chimaerin gene:ENSG00000128656 /// Chimerin (Chimaerin) 1 variant (Fragment) gene:ENSG00000128656 ///<br/> cdna:known<br/> chromosome:NCBI36:2:175372466:175420523:-1 gene:ENSG00000128656 /// cdna:known<br/> chromosome:NCBI36:2:175372489:175419379:-1 gene:ENSG00000128656 /// cdna:known<br/> chromosome:NCBI36:2:175372963:175578343:-1 gene:ENSG00000128656 /// Homo sapiens cDNA FLJ76755 complete cds, highly similar to Homo sapiens chimerin (chimaerin) 1 (CHN1), mRNA. /// Homo sapiens chimerin (chimaerin) 1 (CHN1), transcript variant 2, mRNA. /// Homo sapiens chimerin (chimaerin) 1 (CHN1), transcript variant 1, mRNA.</p> | chimerin (chimaerin) 1                           | 1.11385E-05 | 1.329098757  |
| POLR2G | <p>DNA-directed RNA polymerase II subunit RPB7<br/> gene:ENSG00000168002 /// Human RNA polymerase II subunit hSRPB7 mRNA, complete cds. /// Homo sapiens polymerase (RNA) II (DNA directed) polypeptide G (POLR2G), mRNA.</p>                                                                                                                                                                                                                                                                                                                                                                                                                                                                                                                               | polymerase (RNA) II (DNA directed) polypeptide G | 0.001797464 | 1.27458602   |

|         |                                                                                                                                                                                                                                                                                                                                                                                                                                                                                                                                                                                                                                                                                                                                                                                       |                                          |                 |                 |
|---------|---------------------------------------------------------------------------------------------------------------------------------------------------------------------------------------------------------------------------------------------------------------------------------------------------------------------------------------------------------------------------------------------------------------------------------------------------------------------------------------------------------------------------------------------------------------------------------------------------------------------------------------------------------------------------------------------------------------------------------------------------------------------------------------|------------------------------------------|-----------------|-----------------|
| POLR1E  | Isoform 2 of DNA-directed RNA polymerase I subunit RPA49<br>gene:ENSG00000137054 /// Isoform 1 of DNA-directed RNA polymerase I subunit RPA49<br>gene:ENSG00000137054 /// Homo sapiens polymerase (RNA) I polypeptide E, 53kDa, mRNA (cDNA clone MGC:5609 IMAGE:3461710), complete cds. /// Homo sapiens polymerase (RNA) I polypeptide E, 53kDa (POLR1E), mRNA.                                                                                                                                                                                                                                                                                                                                                                                                                      | polymerase (RNA) I polypeptide E, 53kDa  | 0.005571<br>166 | 1.163774<br>111 |
| OSGEPL1 | Isoform 3 of Probable O-sialoglycoprotein endopeptidase 2<br>gene:ENSG00000128694 /// Homo sapiens O-sialoglycoprotein endopeptidase-like 1, mRNA (cDNA clone MGC:20293 IMAGE:4121450), complete cds. /// Homo sapiens O-sialoglycoprotein endopeptidase-like 1 (OSGEPL1), mRNA.                                                                                                                                                                                                                                                                                                                                                                                                                                                                                                      | O-sialoglycoprotein endopeptidase-like 1 | 0.007468<br>574 | 1.235325<br>034 |
| ZMYM3   | Isoform 2 of Zinc finger MYM-type protein 3 gene:ENSG00000147130 /// Isoform 1 of Zinc finger MYM-type protein 3 gene:ENSG00000147130 /// Isoform 1 of Zinc finger MYM-type protein 3 gene:ENSG00000147130 /// Putative uncharacterized protein ZMYM3 gene:ENSG00000147130 /// Putative uncharacterized protein ZMYM3 gene:ENSG00000147130 /// Putative uncharacterized protein ZMYM3 gene:ENSG00000147130 /// Zinc finger protein 261 gene:ENSG00000147130 /// Putative uncharacterized protein ZMYM3 gene:ENSG00000147130 /// H.sapiens mRNA for protein encoded by a candidate gene, DXS6673E, for mental retardation. /// Homo sapiens zinc finger, MYM-type 3 (ZMYM3), transcript variant 1, mRNA. /// Homo sapiens zinc finger, MYM-type 3 (ZMYM3), transcript variant 2, mRNA. | zinc finger, MYM-type 3                  | 0.002351<br>868 | 1.173522<br>542 |

|          |                                                                                                                                                                                                                                                                                                                                                                                                                                                                                              |                                |             |              |
|----------|----------------------------------------------------------------------------------------------------------------------------------------------------------------------------------------------------------------------------------------------------------------------------------------------------------------------------------------------------------------------------------------------------------------------------------------------------------------------------------------------|--------------------------------|-------------|--------------|
| PRICKLE1 | Prickle-like protein 1<br>gene:ENSG00000139174 /// Homo sapiens REST/NRSF-interacting lim domain protein (RILP) mRNA, complete cds. /// Homo sapiens prickle homolog 1 (Drosophila) (PRICKLE1), mRNA.                                                                                                                                                                                                                                                                                        | prickle homolog 1 (Drosophila) | 7.83665E-09 | 1.620483371  |
| RPS27L   | 40S ribosomal protein S27-like protein gene:ENSG00000185088 /// 13 kDa protein<br>gene:ENSG00000185088 /// Homo sapiens ribosomal protein S27-like, mRNA (cDNA clone MGC:12175 IMAGE:3827362), complete cds. /// Homo sapiens ribosomal protein S27-like (RPS27L), mRNA.                                                                                                                                                                                                                     | ribosomal protein S27-like     | 0.001063446 | -1.254328897 |
| RNF43    | RING finger protein 43<br>gene:ENSG00000108375 /// RING finger protein 43<br>gene:ENSG00000108375 /// Homo sapiens cDNA FLJ77466 complete cds. /// Homo sapiens ring finger protein 43 (RNF43), mRNA.                                                                                                                                                                                                                                                                                        | ring finger protein 43         | 0.000262242 | -1.403402441 |
| RNF26    | RING finger protein 26<br>gene:ENSG00000173456 /// Homo sapiens ring finger protein 26, mRNA (cDNA clone MGC:2642 IMAGE:3507662), complete cds. /// Homo sapiens ring finger protein 26 (RNF26), mRNA.                                                                                                                                                                                                                                                                                       | ring finger protein 26         | 0.002465445 | 1.192581632  |
| RNF138   | Isoform 1 of E3 ubiquitin-protein ligase RNF138<br>gene:ENSG00000134758 /// Isoform 2 of E3 ubiquitin-protein ligase RNF138 gene:ENSG00000134758 /// Isoform 1 of E3 ubiquitin-protein ligase RNF138<br>gene:ENSG00000134758 /// Homo sapiens ring finger protein 138, mRNA (cDNA clone MGC:8758 IMAGE:3914953), complete cds. /// Homo sapiens ring finger protein 138 (RNF138), transcript variant 1, mRNA. /// Homo sapiens ring finger protein 138 (RNF138), transcript variant 2, mRNA. | ring finger protein 138        | 0.005227981 | 1.167172517  |

|          |                                                                                                                                                                                                                                                                                                                                                                                                                                                                                     |                                                                             |                 |                      |
|----------|-------------------------------------------------------------------------------------------------------------------------------------------------------------------------------------------------------------------------------------------------------------------------------------------------------------------------------------------------------------------------------------------------------------------------------------------------------------------------------------|-----------------------------------------------------------------------------|-----------------|----------------------|
| PLEKHF1  | cDNA FLJ55258, highly similar to Homo sapiens pleckstrin homology domain containing, family F member 1, mRNA gene:ENSG00000166289 /// Homo sapiens apoptosis-inducing protein (APPD) mRNA, complete cds. /// Homo sapiens pleckstrin homology domain containing, family F (with FYVE domain) member 1 (PLEKHF1), mRNA.                                                                                                                                                              | pleckstrin homology domain containing, family F (with FYVE domain) member 1 | 0.002726<br>793 | -<br>1.207098<br>368 |
| ZMAT4    | Isoform 1 of Zinc finger matrin-type protein 4 gene:ENSG00000165061 /// Putative uncharacterized protein ZMAT4 gene:ENSG00000165061 /// Isoform 2 of Zinc finger matrin-type protein 4 gene:ENSG00000165061 /// Homo sapiens zinc finger, matrin type 4, mRNA (cDNA clone MGC:24845 IMAGE:4934088), complete cds. /// Homo sapiens zinc finger, matrin type 4 (ZMAT4), transcript variant 1, mRNA. /// Homo sapiens zinc finger, matrin type 4 (ZMAT4), transcript variant 2, mRNA. | zinc finger, matrin type 4                                                  | 0.003094<br>951 | -<br>1.227431<br>955 |
| TP53INP1 | Isoform 1 of Tumor protein p53-inducible nuclear protein 1 gene:ENSG00000164938 /// Isoform 2 of Tumor protein p53-inducible nuclear protein 1 gene:ENSG00000164938 /// Homo sapiens p53-induced protein SIP18 mRNA, complete cds, alternatively spliced. /// Homo sapiens tumor protein p53 inducible nuclear protein 1 (TP53INP1), transcript variant 1, mRNA. /// Homo sapiens tumor protein p53 inducible nuclear protein 1 (TP53INP1), transcript variant 2, mRNA.             | tumor protein p53 inducible nuclear protein 1                               | 0.003404<br>145 | -<br>1.184735<br>098 |

|          |                                                                                                                                                                                                                                                                                                                                                                                                                                     |                                                      |                 |                      |
|----------|-------------------------------------------------------------------------------------------------------------------------------------------------------------------------------------------------------------------------------------------------------------------------------------------------------------------------------------------------------------------------------------------------------------------------------------|------------------------------------------------------|-----------------|----------------------|
| ZFAND2A  | cDNA FLJ76351, highly similar to Homo sapiens zinc finger, AN1-type domain 2A (ZFAND2A), mRNA<br>gene:ENSG00000178381 /// Putative uncharacterized protein ZFAND2A<br>gene:ENSG00000178381 /// AN1-type zinc finger protein 2A<br>gene:ENSG00000178381 /// Homo sapiens zinc finger, AN1-type domain 2A, mRNA (cDNA clone MGC:39501 IMAGE:5263788), complete cds. /// Homo sapiens zinc finger, AN1-type domain 2A (ZFAND2A), mRNA. | zinc finger, AN1-type domain 2A                      | 0.000191<br>425 | -<br>1.355119<br>998 |
| NOB1     | RNA-binding protein NOB1<br>gene:ENSG00000141101 /// Homo sapiens RNA-binding protein NOB1 mRNA, complete cds. /// Homo sapiens NIN1/RPN12 binding protein 1 homolog (S. cerevisiae) (NOB1), mRNA.                                                                                                                                                                                                                                  | NIN1/RPN12 binding protein 1 homolog (S. cerevisiae) | 0.003266<br>145 | 1.192903<br>08       |
| ZNF808   | Isoform 2 of Zinc finger protein 808<br>gene:ENSG00000198482 /// Homo sapiens zinc finger protein 808, mRNA (cDNA clone IMAGE:3542548), complete cds. /// Homo sapiens zinc finger protein 808 (ZNF808), mRNA.                                                                                                                                                                                                                      | zinc finger protein 808                              | 0.000347<br>744 | -<br>1.234566<br>821 |
| SNAI3    | Zinc finger protein SNAI3<br>gene:ENSG00000185669 /// Homo sapiens snail homolog 3 (Drosophila), mRNA (cDNA clone MGC:129606 IMAGE:40005947), complete cds. /// Homo sapiens snail homolog 3 (Drosophila) (SNAI3), mRNA.                                                                                                                                                                                                            | snail homolog 3 (Drosophila)                         | 0.002000<br>567 | -<br>1.227756<br>685 |
| LOC91431 | Isoform 1 of Uncharacterized protein FLJ44066 gene:ENSG00000188014 /// Homo sapiens mRNA; cDNA DKFZp313L226 (from clone DKFZp313L226). /// Homo sapiens prematurely terminated mRNA decay factor-like (LOC91431), mRNA.                                                                                                                                                                                                             | prematurely terminated mRNA decay factor-like        | 0.000309<br>304 | -<br>1.283344<br>003 |

|                                |                                                                                                                                                                                                                                                                                                                                                                                           |                                                                      |                       |                      |
|--------------------------------|-------------------------------------------------------------------------------------------------------------------------------------------------------------------------------------------------------------------------------------------------------------------------------------------------------------------------------------------------------------------------------------------|----------------------------------------------------------------------|-----------------------|----------------------|
| RNF170                         | Isoform 3 of RING finger protein 170<br>gene:ENSG00000120925 /// 37 kDa<br>protein gene:ENSG00000120925 ///<br>Isoform 4 of RING finger protein 170<br>gene:ENSG00000120925 /// Isoform<br>1 of RING finger protein 170<br>gene:ENSG00000120925 /// Homo<br>sapiens cDNA FLJ33545 fis, clone<br>BRAMY2008382. /// Homo sapiens<br>ring finger protein 170 (RNF170),<br>mRNA.              | ring finger protein 170                                              | 0.003313<br>338       | 1.229727<br>891      |
| SLC39A11                       | Isoform 1 of Zinc transporter ZIP11<br>gene:ENSG00000133195 /// Isoform<br>2 of Zinc transporter ZIP11<br>gene:ENSG00000133195 /// Homo<br>sapiens solute carrier family 39 (metal<br>ion transporter), member 11, mRNA<br>(cDNA clone MGC:45399<br>IMAGE:5219031), complete cds. ///<br>Homo sapiens solute carrier family 39<br>(metal ion transporter), member 11<br>(SLC39A11), mRNA. | solute carrier family 39<br>(metal ion<br>transporter), member<br>11 | 0.009180<br>741       | 1.219528<br>08       |
| ZNF654                         | Zinc finger protein 654<br>gene:ENSG00000175105 /// Homo<br>sapiens zinc finger protein 654<br>(ZNF654), mRNA.                                                                                                                                                                                                                                                                            | zinc finger protein 654                                              | 2.52882E<br>-05       | -<br>1.397907<br>68  |
| RNF168                         | RING finger protein 168<br>gene:ENSG00000163961 /// Homo<br>sapiens ring finger protein 168, mRNA<br>(cDNA clone MGC:45398<br>IMAGE:5163887), complete cds. ///<br>Homo sapiens ring finger protein 168<br>(RNF168), mRNA.                                                                                                                                                                | ring finger protein 168                                              | 0.004412<br>193       | -<br>1.155658<br>324 |
| <b>Functional<br/>Group 39</b> | <b>Transcript Description</b>                                                                                                                                                                                                                                                                                                                                                             | <b>Gene Title</b>                                                    | <b>Bayes.In<br/>p</b> | <b>Fold</b>          |

|         |                                                                                                                                                                                                                                                                                                                                                                                                                                                                                                                                                                                                                                                                                                                                                 |                                                               |                 |                      |
|---------|-------------------------------------------------------------------------------------------------------------------------------------------------------------------------------------------------------------------------------------------------------------------------------------------------------------------------------------------------------------------------------------------------------------------------------------------------------------------------------------------------------------------------------------------------------------------------------------------------------------------------------------------------------------------------------------------------------------------------------------------------|---------------------------------------------------------------|-----------------|----------------------|
| PRKG1   | cGMP-dependent protein kinase 1, alpha isozyme<br>gene:ENSG00000185532 /// cGMP-dependent protein kinase 1, alpha isozyme gene:ENSG00000185532 /// cGMP-dependent protein kinase 1, beta isozyme<br>gene:ENSG00000185532 /// Protein kinase, cGMP-dependent, type I<br>gene:ENSG00000185532 /// Protein kinase, cGMP-dependent, type I<br>gene:ENSG00000185532 /// Protein kinase, cGMP-dependent, type I<br>gene:ENSG00000185532 /// Homo sapiens protein kinase, cGMP-dependent, type I, mRNA (cDNA clone MGC:150609 IMAGE:40123332), complete cds. /// Homo sapiens protein kinase, cGMP-dependent, type I (PRKG1), transcript variant 1, mRNA. /// Homo sapiens protein kinase, cGMP-dependent, type I (PRKG1), transcript variant 2, mRNA. | protein kinase, cGMP-dependent, type I                        | 0.006091<br>131 | -<br>1.261068<br>44  |
| KATNAL2 | 40 kDa protein<br>gene:ENSG00000167216 /// Isoform 2 of Katanin p60 ATPase-containing subunit A-like 2<br>gene:ENSG00000167216 /// Homo sapiens katanin p60 subunit A-like 2, mRNA (cDNA clone MGC:33211 IMAGE:4829800), complete cds. /// Homo sapiens katanin p60 subunit A-like 2 (KATNAL2), mRNA.                                                                                                                                                                                                                                                                                                                                                                                                                                           | katanin p60 subunit A-like 2                                  | 0.006896<br>265 | -<br>1.186175<br>082 |
| KIT     | Mast/stem cell growth factor receptor gene:ENSG00000157404 /// Homo sapiens v-kit Hardy-Zuckerman 4 feline sarcoma viral oncogene homolog, mRNA (cDNA clone MGC:87427 IMAGE:4375615), complete cds. /// Homo sapiens v-kit Hardy-Zuckerman 4 feline sarcoma viral oncogene homolog (KIT), transcript variant 1, mRNA. /// Homo sapiens v-kit Hardy-Zuckerman 4 feline sarcoma viral oncogene homolog (KIT), transcript variant 2, mRNA.                                                                                                                                                                                                                                                                                                         | v-kit Hardy-Zuckerman 4 feline sarcoma viral oncogene homolog | 0.001851<br>755 | 1.266088<br>114      |



|       |                                                                                                                                                                                                                                                                                                                                                                                                                                                                                                                                                                                                                                                                                                                                                                                                                                                                                                                                                                                                                                                                                                                                                                                                                                                                                                                              |                                     |                 |                 |
|-------|------------------------------------------------------------------------------------------------------------------------------------------------------------------------------------------------------------------------------------------------------------------------------------------------------------------------------------------------------------------------------------------------------------------------------------------------------------------------------------------------------------------------------------------------------------------------------------------------------------------------------------------------------------------------------------------------------------------------------------------------------------------------------------------------------------------------------------------------------------------------------------------------------------------------------------------------------------------------------------------------------------------------------------------------------------------------------------------------------------------------------------------------------------------------------------------------------------------------------------------------------------------------------------------------------------------------------|-------------------------------------|-----------------|-----------------|
| PIM2  | Serine/threonine-protein kinase Pim-2 gene:ENSG00000102096 /// Homo sapiens pim-2 oncogene, mRNA (cDNA clone MGC:8925 IMAGE:3913552), complete cds. /// Homo sapiens pim-2 oncogene (PIM2), mRNA.                                                                                                                                                                                                                                                                                                                                                                                                                                                                                                                                                                                                                                                                                                                                                                                                                                                                                                                                                                                                                                                                                                                            | pim-2 oncogene                      | 0.005706<br>315 | 1.165492<br>577 |
| FGFR2 | Isoform 17 of Fibroblast growth factor receptor 2 gene:ENSG00000066468 /// fibroblast growth factor receptor 2 isoform 2 precursor gene:ENSG00000066468 /// fibroblast growth factor receptor 2 isoform 1 precursor gene:ENSG00000066468 /// Isoform 16 of Fibroblast growth factor receptor 2 gene:ENSG00000066468 /// Isoform 1 of Fibroblast growth factor receptor 2 gene:ENSG00000066468 /// Isoform 18 of Fibroblast growth factor receptor 2 gene:ENSG00000066468 /// Isoform of FGFR2 gene:ENSG00000066468 /// Isoform 15 of Fibroblast growth factor receptor 2 gene:ENSG00000066468 /// Isoform 20 of Fibroblast growth factor receptor 2 gene:ENSG00000066468 /// 79 kDa protein gene:ENSG00000066468 /// Isoform 5 of Fibroblast growth factor receptor 2 gene:ENSG00000066468 /// fibroblast growth factor receptor 2 isoform 2 precursor gene:ENSG00000066468 /// Isoform 6 of Fibroblast growth factor receptor 2 gene:ENSG00000066468 /// Isoform 18 of Fibroblast growth factor receptor 2 gene:ENSG00000066468 /// Isoform 17 of Fibroblast growth factor receptor 2 gene:ENSG00000066468 /// Isoform 14 of Fibroblast growth factor receptor 2 gene:ENSG00000066468 /// Human fibroblast growth factor receptor (K-sam) mRNA, complete cds. /// Homo sapiens fibroblast growth factor receptor 2 (FGFR2), | fibroblast growth factor receptor 2 | 0.000420<br>397 | 1.229409<br>481 |

|  |                                                                                                                              |  |  |  |
|--|------------------------------------------------------------------------------------------------------------------------------|--|--|--|
|  | <p>transcript variant 2, mRNA. /// Homo sapiens fibroblast growth factor receptor 2 (FGFR2), transcript variant 1, mRNA.</p> |  |  |  |
|--|------------------------------------------------------------------------------------------------------------------------------|--|--|--|

|              |                                                                                                                                                                                                                                                                                                                                                                                                                                                                                                                                                                                                                                                                                                                                                                                                                                                                                                                                                                                                                                                                                                                                                                                                                                                                                                                                                                                                                                                                                                                                                                                                                                                       |                                            |                    |                    |
|--------------|-------------------------------------------------------------------------------------------------------------------------------------------------------------------------------------------------------------------------------------------------------------------------------------------------------------------------------------------------------------------------------------------------------------------------------------------------------------------------------------------------------------------------------------------------------------------------------------------------------------------------------------------------------------------------------------------------------------------------------------------------------------------------------------------------------------------------------------------------------------------------------------------------------------------------------------------------------------------------------------------------------------------------------------------------------------------------------------------------------------------------------------------------------------------------------------------------------------------------------------------------------------------------------------------------------------------------------------------------------------------------------------------------------------------------------------------------------------------------------------------------------------------------------------------------------------------------------------------------------------------------------------------------------|--------------------------------------------|--------------------|--------------------|
| <p>FGFR1</p> | <p>Isoform 1 of Basic fibroblast growth factor receptor 1<br/> gene:ENSG00000077782 /// Isoform 2 of Basic fibroblast growth factor receptor 1 gene:ENSG00000077782 /// Isoform 6 of Basic fibroblast growth factor receptor 1 gene:ENSG00000077782 /// Isoform 14 of Basic fibroblast growth factor receptor 1 gene:ENSG00000077782 /// Isoform 14 of Basic fibroblast growth factor receptor 1 gene:ENSG00000077782 /// Isoform 4 of Basic fibroblast growth factor receptor 1 gene:ENSG00000077782 /// Isoform 8 of Basic fibroblast growth factor receptor 1 gene:ENSG00000077782 /// Isoform 15 of Basic fibroblast growth factor receptor 1 gene:ENSG00000077782 /// Fibroblast growth factor receptor 1 THIRD immunoglobulin domain, FGFR 1 IG domain III gene:ENSG00000077782 /// Isoform 16 of Basic fibroblast growth factor receptor 1 gene:ENSG00000077782 /// Isoform 3 of Basic fibroblast growth factor receptor 1 gene:ENSG00000077782 /// Homo sapiens fibroblast growth factor receptor 1, mRNA (cDNA clone MGC:9218 IMAGE:3896359), complete cds. /// Homo sapiens fibroblast growth factor receptor 1 (FGFR1), transcript variant 2, mRNA. /// Homo sapiens fibroblast growth factor receptor 1 (FGFR1), transcript variant 3, mRNA. /// Homo sapiens fibroblast growth factor receptor 1 (FGFR1), transcript variant 4, mRNA. /// Homo sapiens fibroblast growth factor receptor 1 (FGFR1), transcript variant 1, mRNA. /// Homo sapiens fibroblast growth factor receptor 1 (FGFR1), transcript variant 5, mRNA. /// Homo sapiens fibroblast growth factor receptor 1 (FGFR1), transcript variant 6, mRNA. /// Homo sapiens</p> | <p>fibroblast growth factor receptor 1</p> | <p>0.000142033</p> | <p>1.291247488</p> |
|--------------|-------------------------------------------------------------------------------------------------------------------------------------------------------------------------------------------------------------------------------------------------------------------------------------------------------------------------------------------------------------------------------------------------------------------------------------------------------------------------------------------------------------------------------------------------------------------------------------------------------------------------------------------------------------------------------------------------------------------------------------------------------------------------------------------------------------------------------------------------------------------------------------------------------------------------------------------------------------------------------------------------------------------------------------------------------------------------------------------------------------------------------------------------------------------------------------------------------------------------------------------------------------------------------------------------------------------------------------------------------------------------------------------------------------------------------------------------------------------------------------------------------------------------------------------------------------------------------------------------------------------------------------------------------|--------------------------------------------|--------------------|--------------------|

|        |                                                                                                                                                                                                                                                                                                                                                                                                                                                                                                                                                                                 |                                                         |                 |                 |
|--------|---------------------------------------------------------------------------------------------------------------------------------------------------------------------------------------------------------------------------------------------------------------------------------------------------------------------------------------------------------------------------------------------------------------------------------------------------------------------------------------------------------------------------------------------------------------------------------|---------------------------------------------------------|-----------------|-----------------|
|        | fibroblast growth factor receptor 1 (FGFR1), transcript variant 9, mRNA.                                                                                                                                                                                                                                                                                                                                                                                                                                                                                                        |                                                         |                 |                 |
| TGFBR2 | <p>Isoform 2 of TGF-beta receptor type-2<br/> gene:ENSG00000163513 /// Isoform 1 of TGF-beta receptor type-2<br/> gene:ENSG00000163513 ///<br/> Transforming growth factor beta receptor type IIC<br/> gene:ENSG00000163513 /// Homo sapiens cDNA FLJ53920 complete cds, highly similar to TGF-beta receptor type-2 precursor (EC 2.7.11.30). /// Homo sapiens transforming growth factor, beta receptor II (70/80kDa) (TGFBR2), transcript variant 1, mRNA. /// Homo sapiens transforming growth factor, beta receptor II (70/80kDa) (TGFBR2), transcript variant 2, mRNA.</p> | transforming growth factor, beta receptor II (70/80kDa) | 0.001114<br>476 | 1.270866<br>649 |

|       |                                                                                                                                                                                                                                                     |                                                                     |                 |                      |
|-------|-----------------------------------------------------------------------------------------------------------------------------------------------------------------------------------------------------------------------------------------------------|---------------------------------------------------------------------|-----------------|----------------------|
| DAPK3 | Death-associated protein kinase 3 gene:ENSG00000167657 /// Homo sapiens cDNA FLJ14684 fis, clone NT2RP2004933, highly similar to Death-associated protein kinase 3 (EC 2.7.11.1). /// Homo sapiens death-associated protein kinase 3 (DAPK3), mRNA. | death-associated protein kinase 3                                   | 0.002658<br>432 | -<br>1.192977<br>254 |
| UCK2  | Isoform 1 of Uridine-cytidine kinase 2 gene:ENSG00000143179 /// Homo sapiens uridine-cytidine kinase 2, mRNA (cDNA clone MGC:10318 IMAGE:3940564), complete cds. /// Homo sapiens uridine-cytidine kinase 2 (UCK2), mRNA.                           | uridine-cytidine kinase 2                                           | 0.001546<br>214 | 1.170690<br>178      |
| IGF1R | Insulin-like growth factor 1 receptor gene:ENSG00000140443 /// Homo sapiens IGF1R mRNA for insulin-like growth factor 1 receptor, partial cds. /// Homo sapiens insulin-like growth factor 1 receptor (IGF1R), mRNA.                                | insulin-like growth factor 1 receptor                               | 0.955932<br>191 | 1.001369<br>574      |
| HELZ  | Probable helicase with zinc finger domain gene:ENSG00000198265 /// Homo sapiens helicase with zinc finger, mRNA (cDNA clone MGC:163454 IMAGE:40146613), complete cds. /// Homo sapiens helicase with zinc finger (HELZ), mRNA.                      | helicase with zinc finger                                           | 1.11093E<br>-07 | -<br>1.384436<br>629 |
| KDR   | Vascular endothelial growth factor receptor 2 gene:ENSG00000128052 /// Homo sapiens KDR/flk-1 protein mRNA, complete cds. /// Homo sapiens kinase insert domain receptor (a type III receptor tyrosine kinase) (KDR), mRNA.                         | kinase insert domain receptor (a type III receptor tyrosine kinase) | 0.002021<br>804 | -<br>1.176761<br>484 |
| TYRO3 | Tyrosine-protein kinase receptor TYRO3 gene:ENSG00000092445 /// Homo sapiens mRNA for Sky, complete cds. /// Homo sapiens TYRO3 protein tyrosine kinase (TYRO3), mRNA.                                                                              | TYRO3 protein tyrosine kinase                                       | 0.000354<br>804 | 1.231611<br>604      |

|        |                                                                                                                                                                                                                                                                                                                                                                                                                                                                                                                                                                                                                                                                                                                                                |                                                             |                 |                      |
|--------|------------------------------------------------------------------------------------------------------------------------------------------------------------------------------------------------------------------------------------------------------------------------------------------------------------------------------------------------------------------------------------------------------------------------------------------------------------------------------------------------------------------------------------------------------------------------------------------------------------------------------------------------------------------------------------------------------------------------------------------------|-------------------------------------------------------------|-----------------|----------------------|
| JAK1   | Tyrosine-protein kinase JAK1<br>gene:ENSG00000162434 /// Homo sapiens Janus kinase 1 (a protein tyrosine kinase), mRNA (cDNA clone MGC:164360 IMAGE:40146751), complete cds. /// Homo sapiens Janus kinase 1 (a protein tyrosine kinase) (JAK1), mRNA.                                                                                                                                                                                                                                                                                                                                                                                                                                                                                         | Janus kinase 1 (a protein tyrosine kinase)                  | 0.004514<br>96  | -<br>1.142309<br>634 |
| AURKB  | Serine/threonine-protein kinase 12<br>gene:ENSG00000178999 /// Homo sapiens aurora kinase B, mRNA (cDNA clone MGC:8406 IMAGE:2820719), complete cds. /// Homo sapiens aurora kinase B (AURKB), mRNA.                                                                                                                                                                                                                                                                                                                                                                                                                                                                                                                                           | aurora kinase B                                             | 0.000561<br>556 | 1.227580<br>402      |
| DDX43  | Probable ATP-dependent RNA helicase DDX43<br>gene:ENSG00000080007 /// Homo sapiens mRNA for DEAD-box protein (HAGE gene). /// Homo sapiens DEAD (Asp-Glu-Ala-Asp) box polypeptide 43 (DDX43), mRNA.                                                                                                                                                                                                                                                                                                                                                                                                                                                                                                                                            | DEAD (Asp-Glu-Ala-Asp) box polypeptide 43                   | 2.80542E<br>-06 | -<br>1.812446<br>668 |
| HSPA1B | Heat shock 70 kDa protein 1<br>gene:ENSG00000215292 /// cDNA FLJ54389, highly similar to Heat shock 70 kDa protein 1<br>gene:ENSG00000215292 /// cDNA FLJ54392, highly similar to Heat shock 70 kDa protein 1<br>gene:ENSG00000215328 /// cDNA FLJ54389, highly similar to Heat shock 70 kDa protein 1<br>gene:ENSG00000215328 /// cDNA FLJ54389, highly similar to Heat shock 70 kDa protein 1<br>gene:ENSG00000204389 /// Heat shock 70 kDa protein 1<br>gene:ENSG00000204389 /// Homo sapiens cDNA FLJ54328 complete cds, highly similar to Heat shock 70 kDa protein 1. /// Homo sapiens heat shock 70kDa protein 1A, mRNA (cDNA clone MGC:1309 IMAGE:3345864), complete cds. /// Homo sapiens heat shock 70kDa protein 1A (HSPA1A), mRNA. | heat shock 70kDa protein 1B /// heat shock 70kDa protein 1A | 2.08E-10        | -<br>1.825669<br>476 |

|          |                                                                                                                                                                                                                                                                                                                                                                                                                                                                                                                                                                                        |                                                              |                 |                      |
|----------|----------------------------------------------------------------------------------------------------------------------------------------------------------------------------------------------------------------------------------------------------------------------------------------------------------------------------------------------------------------------------------------------------------------------------------------------------------------------------------------------------------------------------------------------------------------------------------------|--------------------------------------------------------------|-----------------|----------------------|
| INSR     | insulin receptor isoform Short precursor gene:ENSG00000171105<br>/// Insulin receptor precursor gene:ENSG00000171105 /// Human insulin receptor mRNA, complete cds. /// Homo sapiens insulin receptor (INSR), transcript variant 1, mRNA. /// Homo sapiens insulin receptor (INSR), transcript variant 2, mRNA.                                                                                                                                                                                                                                                                        | insulin receptor                                             | 0.007080<br>331 | -<br>1.171137<br>68  |
| CDC42BPG | Serine/threonine-protein kinase MRCK gamma gene:ENSG00000171219 /// Homo sapiens myotonic dystrophy kinase-related CDC42-binding kinase gamma mRNA, complete cds. /// Homo sapiens CDC42 binding protein kinase gamma (DMPK-like) (CDC42BPG), mRNA.                                                                                                                                                                                                                                                                                                                                    | CDC42 binding protein kinase gamma (DMPK-like)               | 0.001831<br>502 | -<br>1.274942<br>688 |
| PRKD3    | Isoform 1 of Serine/threonine-protein kinase D3 gene:ENSG00000115825<br>/// Isoform 1 of Serine/threonine-protein kinase D3 gene:ENSG00000115825 /// Homo sapiens EPK2 mRNA for serine/threonine kinase, complete cds. /// Homo sapiens protein kinase D3 (PRKD3), mRNA.                                                                                                                                                                                                                                                                                                               | protein kinase D3                                            | 0.009198<br>204 | 1.286906<br>608      |
| PRKAG1   | cDNA FLJ40287 fis, clone TESTI2027909, highly similar to 5'-AMP-ACTIVATED PROTEIN KINASE, GAMMA-1 SUBUNIT gene:ENSG00000181929 /// 5'-AMP-activated protein kinase subunit gamma-1 gene:ENSG00000181929 /// Homo sapiens protein kinase, AMP-activated, gamma 1 non-catalytic subunit, mRNA (cDNA clone MGC:8666 IMAGE:2964434), complete cds. /// Homo sapiens protein kinase, AMP-activated, gamma 1 non-catalytic subunit (PRKAG1), transcript variant 1, mRNA. /// Homo sapiens protein kinase, AMP-activated, gamma 1 non-catalytic subunit (PRKAG1), transcript variant 2, mRNA. | protein kinase, AMP-activated, gamma 1 non-catalytic subunit | 0.000357<br>63  | 1.212655<br>185      |

|         |                                                                                                                                                                                                                                                                                                                                                                                                                                                           |                                                           |              |                |
|---------|-----------------------------------------------------------------------------------------------------------------------------------------------------------------------------------------------------------------------------------------------------------------------------------------------------------------------------------------------------------------------------------------------------------------------------------------------------------|-----------------------------------------------------------|--------------|----------------|
| CSNK1G1 | Isoform 1L of Casein kinase I isoform gamma-1 gene:ENSG00000169118 /// Isoform 1S of Casein kinase I isoform gamma-1 gene:ENSG00000169118 /// Homo sapiens casein kinase 1, gamma 1, mRNA (cDNA clone MGC:163485 IMAGE:40146644), complete cds. /// Homo sapiens casein kinase 1, gamma 1 (CSNK1G1), mRNA.                                                                                                                                                | casein kinase 1, gamma 1                                  | 2.72735E-05  | - 1.352555 123 |
| EIF2AK3 | eukaryotic translation initiation factor 2-alpha kinase 3 gene:ENSG00000172071 /// Homo sapiens eukaryotic translation initiation factor 2 alpha kinase PEK mRNA, complete cds. /// Homo sapiens eukaryotic translation initiation factor 2-alpha kinase 3 (EIF2AK3), mRNA.                                                                                                                                                                               | eukaryotic translation initiation factor 2-alpha kinase 3 | 0.001124 391 | - 1.228300 76  |
| PFKM    | cDNA FLJ44241 fis, clone THYMU3008436, highly similar to 6-phosphofructokinase, muscle type gene:ENSG00000152556 /// Isoform 1 of 6-phosphofructokinase, muscle type gene:ENSG00000152556 /// Isoform 2 of 6-phosphofructokinase, muscle type gene:ENSG00000152556 /// Homo sapiens cDNA FLJ44241 fis, clone THYMU3008436, highly similar to 6-phosphofructokinase, muscle type (EC 2.7.1.11). /// Homo sapiens phosphofructokinase, muscle (PFKM), mRNA. | phosphofructokinase, muscle                               | 0.008182 424 | 1.169155 28    |
| HSPA2   | Heat shock-related 70 kDa protein 2 gene:ENSG00000126803 /// Heat shock-related 70 kDa protein 2 gene:ENSG00000126803 /// Homo sapiens heat shock 70kDa protein 2, mRNA (cDNA clone MGC:33922 IMAGE:5276121), complete cds. /// Homo sapiens heat shock 70kDa protein 2 (HSPA2), mRNA.                                                                                                                                                                    | heat shock 70kDa protein 2                                | 0.006917 989 | - 1.155762 729 |



|       |                                                                                                                                                                                                                                                                                                                                                                                                                                                                                                                                                                                                                                                                                                                                                                           |                                                                              |                 |                      |
|-------|---------------------------------------------------------------------------------------------------------------------------------------------------------------------------------------------------------------------------------------------------------------------------------------------------------------------------------------------------------------------------------------------------------------------------------------------------------------------------------------------------------------------------------------------------------------------------------------------------------------------------------------------------------------------------------------------------------------------------------------------------------------------------|------------------------------------------------------------------------------|-----------------|----------------------|
| CDC2  | cell division cycle 2 protein isoform 1<br>gene:ENSG00000170312 /// cell division cycle 2 protein isoform 1<br>gene:ENSG00000170312 /// Isoform 2 of Cell division control protein 2 homolog gene:ENSG00000170312 /// Putative uncharacterized protein DKFZp686L20222<br>gene:ENSG00000170312 /// Isoform 2 of Cell division control protein 2 homolog gene:ENSG00000170312 /// Homo sapiens cell division cycle 2, G1 to S and G2 to M, mRNA (cDNA clone IMAGE:6710672). /// Homo sapiens cell division cycle 2, G1 to S and G2 to M (CDC2), transcript variant 2, mRNA. /// Homo sapiens cell division cycle 2, G1 to S and G2 to M (CDC2), transcript variant 3, mRNA. /// Homo sapiens cell division cycle 2, G1 to S and G2 to M (CDC2), transcript variant 1, mRNA. | cell division cycle 2, G1 to S and G2 to M                                   | 0.008860<br>211 | 1.220305<br>846      |
| NUAK2 | cDNA FLJ56013, highly similar to NUA family SNF1-like kinase 2<br>gene:ENSG00000163545 /// Homo sapiens cDNA FLJ56013 complete cds, highly similar to NUA family SNF1-like kinase 2 (EC 2.7.11.1). /// Homo sapiens NUA family, SNF1-like kinase, 2 (NUAK2), mRNA.                                                                                                                                                                                                                                                                                                                                                                                                                                                                                                        | NUAK family, SNF1-like kinase, 2                                             | 0.003552<br>75  | -<br>1.223639<br>628 |
| PLK2  | Serine/threonine-protein kinase PLK2<br>gene:ENSG00000145632 /// Homo sapiens serum-inducible kinase (SNK) mRNA, complete cds. /// Homo sapiens polo-like kinase 2 (Drosophila) (PLK2), mRNA.                                                                                                                                                                                                                                                                                                                                                                                                                                                                                                                                                                             | polo-like kinase 2 (Drosophila)                                              | 0.001472<br>681 | -<br>1.230231<br>76  |
| HSPA7 | Heat shock 70 kDa protein 6<br>gene:ENSG00000173110 /// Homo sapiens heat shock 70kDa protein 6 (HSP70B'), mRNA (cDNA clone MGC:46216 IMAGE:5723718), complete cds. /// Homo sapiens heat shock 70kDa protein 6 (HSP70B') (HSPA6), mRNA. /// Homo sapiens heat shock 70kDa protein 7 (HSP70B) (HSPA7), non-coding RNA.                                                                                                                                                                                                                                                                                                                                                                                                                                                    | heat shock 70kDa protein 6 (HSP70B') /// heat shock 70kDa protein 7 (HSP70B) | 8.65E-05        | -<br>1.420883<br>396 |

|          |                                                                                                                                                                                                                                                                                                                                                                                                                                                                                                                                         |                                                             |             |                  |
|----------|-----------------------------------------------------------------------------------------------------------------------------------------------------------------------------------------------------------------------------------------------------------------------------------------------------------------------------------------------------------------------------------------------------------------------------------------------------------------------------------------------------------------------------------------|-------------------------------------------------------------|-------------|------------------|
| DQX1     | Isoform 1 of ATP-dependent RNA helicase DQX1<br>gene:ENSG00000144045 /// Isoform 1 of ATP-dependent RNA helicase DQX1 gene:ENSG00000144045 /// Isoform 2 of ATP-dependent RNA helicase DQX1<br>gene:ENSG00000144045 /// Homo sapiens DEAQ box polypeptide 1 (RNA-dependent ATPase), mRNA (cDNA clone MGC:104000 IMAGE:30915408), complete cds. /// Homo sapiens DEAQ box polypeptide 1 (RNA-dependent ATPase) (DQX1), mRNA.                                                                                                             | DEAQ box polypeptide 1 (RNA-dependent ATPase)               | 1.18422E-05 | -<br>1.604766031 |
| MAPKAPK2 | Isoform 1 of MAP kinase-activated protein kinase 2<br>gene:ENSG00000162889 /// Isoform 2 of MAP kinase-activated protein kinase 2 gene:ENSG00000162889 /// Homo sapiens mitogen-activated protein kinase-activated protein kinase 2, mRNA (cDNA clone MGC:59706 IMAGE:6267183), complete cds. /// Homo sapiens mitogen-activated protein kinase-activated protein kinase 2 (MAPKAPK2), transcript variant 1, mRNA. /// Homo sapiens mitogen-activated protein kinase-activated protein kinase 2 (MAPKAPK2), transcript variant 2, mRNA. | mitogen-activated protein kinase-activated protein kinase 2 | 0.008088491 | 1.14559268       |
| MAPKAPK3 | MAP kinase-activated protein kinase 3 gene:ENSG00000114738 /// Homo sapiens MAPKAP kinase (3pK) mRNA, complete cds. /// Homo sapiens mitogen-activated protein kinase-activated protein kinase 3 (MAPKAPK3), mRNA.                                                                                                                                                                                                                                                                                                                      | mitogen-activated protein kinase-activated protein kinase 3 | 0.001820874 | 1.193094365      |
| EPHB1    | Isoform 1 of Ephrin type-B receptor 1<br>gene:ENSG00000154928 /// Isoform 4 of Ephrin type-B receptor 1<br>gene:ENSG00000154928 /// Homo sapiens (clone FBK III 16) protein tyrosine kinase (NET PTK) mRNA, complete cds. /// Homo sapiens EPH receptor B1 (EPHB1), mRNA.                                                                                                                                                                                                                                                               | EPH receptor B1                                             | 0.000880803 | -<br>1.270478492 |

|        |                                                                                                                                                                                                                                                                                                                                                         |                                 |                 |                      |
|--------|---------------------------------------------------------------------------------------------------------------------------------------------------------------------------------------------------------------------------------------------------------------------------------------------------------------------------------------------------------|---------------------------------|-----------------|----------------------|
| EPHA2  | <p>ephrin receptor EphA2<br/> gene:ENSG00000142627 /// ephrin receptor EphA2<br/> gene:ENSG00000142627 /// Homo sapiens EPH receptor A2, mRNA (cDNA clone MGC:29717 IMAGE:5090654), complete cds. /// Homo sapiens EPH receptor A2 (EPHA2), mRNA.</p>                                                                                                   | EPH receptor A2                 | 3.16267E-05     | -<br>1.358836<br>438 |
| SEPHS1 | <p>Selenophosphate synthetase 1<br/> gene:ENSG00000086475 /// Selenide, water dikinase 1<br/> gene:ENSG00000086475 /// Selenophosphate synthetase 1<br/> gene:ENSG00000086475 /// Homo sapiens selenophosphate synthetase 1, mRNA (cDNA clone MGC:74471 IMAGE:6186560), complete cds. /// Homo sapiens selenophosphate synthetase 1 (SEPHS1), mRNA.</p> | selenophosphate synthetase 1    | 0.004247<br>486 | 1.150551<br>013      |
| PLK1   | <p>Serine/threonine-protein kinase PLK1<br/> gene:ENSG00000166851 /// Polo-like kinase 1 delta<br/> gene:ENSG00000166851 /// Homo sapiens mRNA for polo-like kinase variant protein. /// Homo sapiens polo-like kinase 1 (Drosophila) (PLK1), mRNA.</p>                                                                                                 | polo-like kinase 1 (Drosophila) | 0.000696<br>133 | 1.218092<br>061      |
| WEE1   | <p>Wee1-like protein kinase<br/> gene:ENSG00000166483 /// Homo sapiens WEE1 homolog (S. pombe), mRNA (cDNA clone MGC:60116 IMAGE:6147695), complete cds. /// Homo sapiens WEE1 homolog (S. pombe) (WEE1), mRNA.</p>                                                                                                                                     | WEE1 homolog (S. pombe)         | 0.146954<br>219 | -<br>1.075687<br>97  |
| HK2    | <p>Hexokinase-2<br/> gene:ENSG00000159399 ///<br/> cdna:known<br/> chromosome:NCBI36:2:74915805:74973994:1 gene:ENSG00000159399 ///<br/> Homo sapiens hexokinase 2, mRNA (cDNA clone MGC:74789 IMAGE:5586773), complete cds. /// Homo sapiens hexokinase 2 (HK2), mRNA.</p>                                                                             | hexokinase 2                    | 9.23437E-09     | 1.598668<br>999      |

|       |                                                                                                                                                                                                                                                                                                                                                                                                                                                                                                                                                 |                                                        |             |                  |
|-------|-------------------------------------------------------------------------------------------------------------------------------------------------------------------------------------------------------------------------------------------------------------------------------------------------------------------------------------------------------------------------------------------------------------------------------------------------------------------------------------------------------------------------------------------------|--------------------------------------------------------|-------------|------------------|
| DCLK1 | Isoform 3 of Serine/threonine-protein kinase DCLK1<br>gene:ENSG00000133083 /// Isoform 1 of Serine/threonine-protein kinase DCLK1 gene:ENSG00000133083 /// Isoform 2 of Serine/threonine-protein kinase DCLK1<br>gene:ENSG00000133083 /// Isoform 4 of Serine/threonine-protein kinase DCLK1 gene:ENSG00000133083 /// Doublecortin and CaM kinase-like 1 gene:ENSG00000133083 /// Homo sapiens doublecortin-like kinase 1, mRNA (cDNA clone MGC:176710 IMAGE:8862589), complete cds. /// Homo sapiens doublecortin-like kinase 1 (DCLK1), mRNA. | doublecortin-like kinase 1                             | 3.20356E-08 | -<br>1.537273858 |
| STK39 | STE20/SPS1-related proline-alanine-rich protein kinase<br>gene:ENSG00000198648 /// Homo sapiens Ste-20 related kinase SPAK mRNA, complete cds. /// Homo sapiens serine threonine kinase 39 (STE20/SPS1 homolog, yeast) (STK39), mRNA.                                                                                                                                                                                                                                                                                                           | serine threonine kinase 39 (STE20/SPS1 homolog, yeast) | 0.000889872 | 1.182857802      |
| BMP2K | Isoform 1 of BMP-2-inducible protein kinase gene:ENSG00000138756 /// Isoform 2 of BMP-2-inducible protein kinase gene:ENSG00000138756 /// Isoform 3 of BMP-2-inducible protein kinase gene:ENSG00000138756 /// Homo sapiens mRNA; cDNA DKFZp434P0116 (from clone DKFZp434P0116). /// Homo sapiens BMP2 inducible kinase (BMP2K), transcript variant 2, mRNA. /// Homo sapiens BMP2 inducible kinase (BMP2K), transcript variant 1, mRNA.                                                                                                        | BMP2 inducible kinase                                  | 0.008509011 | -<br>1.165971055 |

|       |                                                                                                                                                                                                                                                                                                                                                                                                                                                                                                                                                                                                                                                                                                                                                                                                                                                                                                                                                                                                                                                                                                                                                                                                                                                  |                                          |                 |                      |
|-------|--------------------------------------------------------------------------------------------------------------------------------------------------------------------------------------------------------------------------------------------------------------------------------------------------------------------------------------------------------------------------------------------------------------------------------------------------------------------------------------------------------------------------------------------------------------------------------------------------------------------------------------------------------------------------------------------------------------------------------------------------------------------------------------------------------------------------------------------------------------------------------------------------------------------------------------------------------------------------------------------------------------------------------------------------------------------------------------------------------------------------------------------------------------------------------------------------------------------------------------------------|------------------------------------------|-----------------|----------------------|
| HIPK1 | <p>Isoform 4 of Homeodomain-interacting protein kinase 1<br/> gene:ENSG00000163349 /// cDNA FLJ57817, highly similar to Homeodomain-interacting protein kinase 1 gene:ENSG00000163349 /// Homeodomain interacting protein kinase 1 gene:ENSG00000163349 /// Isoform 2 of Homeodomain-interacting protein kinase 1 gene:ENSG00000163349 /// cDNA FLJ57817, highly similar to Homeodomain-interacting protein kinase 1 gene:ENSG00000163349 /// Homeodomain interacting protein kinase 1 gene:ENSG00000163349 /// Isoform 3 of Homeodomain-interacting protein kinase 1 gene:ENSG00000163349 /// Isoform 4 of Homeodomain-interacting protein kinase 1 gene:ENSG00000163349 /// Isoform 4 of Homeodomain-interacting protein kinase 1 gene:ENSG00000163349 /// Homo sapiens HIPK1 mRNA for homeodomain-interacting protein kinase-1, complete cds. /// Homo sapiens homeodomain interacting protein kinase 1 (HIPK1), transcript variant 2, mRNA. /// Homo sapiens homeodomain interacting protein kinase 1 (HIPK1), transcript variant 1, mRNA. /// Homo sapiens homeodomain interacting protein kinase 1 (HIPK1), transcript variant 3, mRNA. /// Homo sapiens homeodomain interacting protein kinase 1 (HIPK1), transcript variant 4, mRNA.</p> | homeodomain interacting protein kinase 1 | 0.009937<br>791 | 1.150503<br>935      |
| PLK3  | <p>Serine/threonine-protein kinase PLK3<br/> gene:ENSG00000173846 /// Homo sapiens mRNA for FNK serine/threonine protein kinase. /// Homo sapiens polo-like kinase 3 (Drosophila) (PLK3), mRNA.</p>                                                                                                                                                                                                                                                                                                                                                                                                                                                                                                                                                                                                                                                                                                                                                                                                                                                                                                                                                                                                                                              | polo-like kinase 3 (Drosophila)          | 0.002562<br>24  | -<br>1.228146<br>892 |

|       |                                                                                                                                                                                                                                                                                                                                                                                                                                                                                                                                                                                                                                                                                                                                                     |                                                        |                         |                               |
|-------|-----------------------------------------------------------------------------------------------------------------------------------------------------------------------------------------------------------------------------------------------------------------------------------------------------------------------------------------------------------------------------------------------------------------------------------------------------------------------------------------------------------------------------------------------------------------------------------------------------------------------------------------------------------------------------------------------------------------------------------------------------|--------------------------------------------------------|-------------------------|-------------------------------|
| NEK3  | <p>NIMA (Never in mitosis gene a)-related kinase 3, isoform CRA_a<br/> gene:ENSG00000136098 /// NIMA (Never in mitosis gene a)-related kinase 3, isoform CRA_a<br/> gene:ENSG00000136098 /// Isoform 2 of Serine/threonine-protein kinase Nek3<br/> gene:ENSG00000136098 /// NIMA (Never in mitosis gene a)-related kinase 3, isoform CRA_a<br/> gene:ENSG00000136098 /// Homo sapiens cDNA FLJ75370 complete cds, highly similar to Homo sapiens NIMA (never in mitosis gene a)-related kinase 3 (NEK3), transcript variant 2, mRNA. /// Homo sapiens NIMA (never in mitosis gene a)-related kinase 3 (NEK3), transcript variant 1, mRNA. /// Homo sapiens NIMA (never in mitosis gene a)-related kinase 3 (NEK3), transcript variant 2, mRNA.</p> | <p>NIMA (never in mitosis gene a)-related kinase 3</p> | <p>0.003582<br/>46</p>  | <p>1.187510<br/>726</p>       |
| HSPH1 | <p>cDNA FLJ52364, highly similar to Heat-shock protein 105 kDa<br/> gene:ENSG00000120694 /// Isoform 3 of Heat shock protein 105 kDa<br/> gene:ENSG00000120694 /// Isoform Beta of Heat shock protein 105 kDa<br/> gene:ENSG00000120694 /// Heat shock 105kDa/110kDa protein 1<br/> gene:ENSG00000120694 /// Homo sapiens heat shock 105kDa/110kDa protein 1, mRNA (cDNA clone MGC:40320 IMAGE:4540927), complete cds. /// Homo sapiens heat shock 105kDa/110kDa protein 1 (HSPH1), mRNA.</p>                                                                                                                                                                                                                                                       | <p>heat shock 105kDa/110kDa protein 1</p>              | <p>0.000133<br/>782</p> | <p>-<br/>1.228477<br/>359</p> |

|       |                                                                                                                                                                                                                                                                                                                                                                                                                                                                                                                                                                                                                   |                                               |                 |                      |
|-------|-------------------------------------------------------------------------------------------------------------------------------------------------------------------------------------------------------------------------------------------------------------------------------------------------------------------------------------------------------------------------------------------------------------------------------------------------------------------------------------------------------------------------------------------------------------------------------------------------------------------|-----------------------------------------------|-----------------|----------------------|
| TLK1  | Isoform 2 of Serine/threonine-protein kinase tousled-like 1<br>gene:ENSG00000198586 /// Isoform 1 of Serine/threonine-protein kinase tousled-like 1<br>gene:ENSG00000198586 ///<br>cdna:known<br>chromosome:NCBI36:2:171558483:171631729:-1 gene:ENSG00000198586 /// Homo sapiens cDNA FLJ77613 complete cds, highly similar to Homo sapiens tousled-like kinase 1 (TLK1), mRNA. /// Homo sapiens tousled-like kinase 1 (TLK1), transcript variant 1, mRNA. /// Homo sapiens tousled-like kinase 1 (TLK1), transcript variant 2, mRNA. /// Homo sapiens tousled-like kinase 1 (TLK1), transcript variant 3, mRNA. | tousled-like kinase 1                         | 0.009455<br>382 | 1.137161<br>626      |
| PASK  | Isoform 2 of PAS domain-containing serine/threonine-protein kinase<br>gene:ENSG00000115687 /// Isoform 1 of PAS domain-containing serine/threonine-protein kinase<br>gene:ENSG00000115687 /// Isoform 1 of PAS domain-containing serine/threonine-protein kinase<br>gene:ENSG00000115687 /// PASK protein<br>gene:ENSG00000115687 /// Homo sapiens PAS-kinase (PASK) mRNA, complete cds. /// Homo sapiens PAS domain containing serine/threonine kinase (PASK), mRNA.                                                                                                                                             | PAS domain containing serine/threonine kinase | 0.006873<br>993 | 1.193090<br>479      |
| GK    | #N/A                                                                                                                                                                                                                                                                                                                                                                                                                                                                                                                                                                                                              | #N/A                                          | #N/A            | #N/A                 |
| STYK1 | Tyrosine protein-kinase STYK1<br>gene:ENSG00000060140 /// Homo sapiens kinase domain protein mRNA, complete cds. /// Homo sapiens serine/threonine/tyrosine kinase 1 (STYK1), mRNA.                                                                                                                                                                                                                                                                                                                                                                                                                               | serine/threonine/tyrosine kinase 1            | 0.000979<br>519 | -<br>1.342514<br>754 |
| GK3P  | Homo sapiens glycerol kinase 3 pseudogene, mRNA (cDNA clone MGC:87453 IMAGE:4821051), complete cds.                                                                                                                                                                                                                                                                                                                                                                                                                                                                                                               | glycerol kinase 3 pseudogene                  | 0.708098<br>968 | -<br>1.036486<br>798 |

|        |                                                                                                                                                                                                                                                                                                                                                                                                                                                                                                                                                                                                                                |                                              |                 |                      |
|--------|--------------------------------------------------------------------------------------------------------------------------------------------------------------------------------------------------------------------------------------------------------------------------------------------------------------------------------------------------------------------------------------------------------------------------------------------------------------------------------------------------------------------------------------------------------------------------------------------------------------------------------|----------------------------------------------|-----------------|----------------------|
| RIOK3  | Isoform 1 of Serine/threonine-protein kinase RIO3 gene:ENSG00000101782 /// Homo sapiens RIO kinase 3 (yeast), mRNA (cDNA clone IMAGE:4828351). /// Homo sapiens RIO kinase 3 (yeast) (RIOK3), mRNA.                                                                                                                                                                                                                                                                                                                                                                                                                            | RIO kinase 3 (yeast)                         | 0.000166<br>833 | -<br>1.244652<br>245 |
| NLRP10 | NACHT, LRR and PYD domains-containing protein 10 gene:ENSG00000182261 /// Homo sapiens NLR family, pyrin domain containing 10, mRNA (cDNA clone MGC:132617 IMAGE:8143960), complete cds. /// Homo sapiens NLR family, pyrin domain containing 10 (NLRP10), mRNA.                                                                                                                                                                                                                                                                                                                                                               | NLR family, pyrin domain containing 10       | 0.004550<br>419 | -<br>1.334584<br>327 |
| ZRANB3 | Isoform 2 of Zinc finger Ran-binding domain-containing protein 3 gene:ENSG00000121988 /// Isoform 2 of Zinc finger Ran-binding domain-containing protein 3 gene:ENSG00000121988 /// Isoform 1 of Zinc finger Ran-binding domain-containing protein 3 gene:ENSG00000121988 /// Isoform 1 of Zinc finger Ran-binding domain-containing protein 3 gene:ENSG00000121988 /// cDNA FLJ38043 fis, clone CTONG2014058, weakly similar to HepA-related protein gene:ENSG00000121988 /// Homo sapiens mRNA; cDNA DKFZp686D0128 (from clone DKFZp686D0128). /// Homo sapiens zinc finger, RAN-binding domain containing 3 (ZRANB3), mRNA. | zinc finger, RAN-binding domain containing 3 | 0.060927<br>073 | 1.149254<br>077      |
| NRBP2  | cDNA FLJ60460, moderately similar to Nuclear receptor-binding protein gene:ENSG00000185189 /// Homo sapiens nuclear receptor binding protein 2, mRNA (cDNA clone IMAGE:4375917). /// Homo sapiens nuclear receptor binding protein 2 (NRBP2), mRNA.                                                                                                                                                                                                                                                                                                                                                                            | nuclear receptor binding protein 2           | 0.005356<br>912 | -<br>1.224520<br>969 |



|                            |                                                                                                                                                                                                                                                                                                                                               |                                                            |                   |                      |
|----------------------------|-----------------------------------------------------------------------------------------------------------------------------------------------------------------------------------------------------------------------------------------------------------------------------------------------------------------------------------------------|------------------------------------------------------------|-------------------|----------------------|
| HSPA6                      | Heat shock 70 kDa protein 6<br>gene:ENSG00000173110 /// Homo sapiens heat shock 70kDa protein 6 (HSP70B'), mRNA (cDNA clone MGC:46216 IMAGE:5723718), complete cds. /// Homo sapiens heat shock 70kDa protein 6 (HSP70B') (HSPA6), mRNA.                                                                                                      | heat shock 70kDa protein 6 (HSP70B')                       | 2.08988E-08       | -<br>1.740985<br>354 |
| STC1                       | Stanniocalcin-1<br>gene:ENSG00000159167 /// Homo sapiens stanniocalcin precursor (STC) mRNA, complete cds. /// Homo sapiens stanniocalcin 1 (STC1), mRNA.                                                                                                                                                                                     | stanniocalcin 1                                            | 0.000182<br>276   | 1.474049<br>406      |
| HSPA4L                     | cDNA FLJ55529, highly similar to Heat shock 70 kDa protein 4L<br>gene:ENSG00000164070 /// Homo sapiens heat shock protein apg-1 mRNA, complete cds. /// Homo sapiens heat shock 70kDa protein 4-like (HSPA4L), mRNA.                                                                                                                          | heat shock 70kDa protein 4-like                            | 0.000679<br>124   | -<br>1.242054<br>577 |
| <b>Functional Group 40</b> | <b>Transcript Description</b>                                                                                                                                                                                                                                                                                                                 | <b>Gene Title</b>                                          | <b>Bayes.In p</b> | <b>Fold</b>          |
| SYNCRIP                    | Isoform 3 of Heterogeneous nuclear ribonucleoprotein Q<br>gene:ENSG00000135316 /// Isoform 1 of Heterogeneous nuclear ribonucleoprotein Q<br>gene:ENSG00000135316 /// Homo sapiens RRM RNA binding protein Gry-rbp (GRY-RBP) mRNA, complete cds. /// Homo sapiens synaptotagmin binding, cytoplasmic RNA interacting protein (SYNCRIP), mRNA. | synaptotagmin binding, cytoplasmic RNA interacting protein | 0.009866<br>41    | 1.134711<br>189      |

|        |                                                                                                                                                                                                                                                                                                                                                                                                                                                                                                                                                                                                                                                                                                                                                                                                                                                                                                                                                                                                       |                                                       |             |              |
|--------|-------------------------------------------------------------------------------------------------------------------------------------------------------------------------------------------------------------------------------------------------------------------------------------------------------------------------------------------------------------------------------------------------------------------------------------------------------------------------------------------------------------------------------------------------------------------------------------------------------------------------------------------------------------------------------------------------------------------------------------------------------------------------------------------------------------------------------------------------------------------------------------------------------------------------------------------------------------------------------------------------------|-------------------------------------------------------|-------------|--------------|
| CUGBP2 | <p>Isoform 3 of CUG-BP- and ETR-3-like factor 2 gene:ENSG00000048740 ///</p> <p>Isoform 2 of CUG-BP- and ETR-3-like factor 2 gene:ENSG00000048740 ///</p> <p>Isoform 2 of CUG-BP- and ETR-3-like factor 2 gene:ENSG00000048740 ///</p> <p>Isoform 1 of CUG-BP- and ETR-3-like factor 2 gene:ENSG00000048740 ///</p> <p>Isoform 1 of CUG-BP- and ETR-3-like factor 2 gene:ENSG00000048740 ///</p> <p>Isoform 2 of CUG-BP- and ETR-3-like factor 2 gene:ENSG00000048740 ///</p> <p>Homo sapiens apoptosis-related RNA binding protein (NAPOR-3) mRNA, complete cds. ///</p> <p>Homo sapiens CUG triplet repeat, RNA binding protein 2 (CUGBP2), transcript variant 1, mRNA. ///</p> <p>Homo sapiens CUG triplet repeat, RNA binding protein 2 (CUGBP2), transcript variant 4, mRNA. ///</p> <p>Homo sapiens CUG triplet repeat, RNA binding protein 2 (CUGBP2), transcript variant 3, mRNA. ///</p> <p>Homo sapiens CUG triplet repeat, RNA binding protein 2 (CUGBP2), transcript variant 2, mRNA.</p> | CUG triplet repeat, RNA binding protein 2             | 0.001933061 | -1.228518213 |
| SNRPB  | <p>Isoform SM-B of Small nuclear ribonucleoprotein-associated proteins B and B' gene:ENSG00000125835 ///</p> <p>30 kDa protein gene:ENSG00000125835 ///</p> <p>Isoform SM-B' of Small nuclear ribonucleoprotein-associated proteins B and B' gene:ENSG00000125835 ///</p> <p>Putative uncharacterized protein SNRPB gene:ENSG00000125835 ///</p> <p>Homo sapiens small nuclear ribonucleoprotein polypeptides B and B1, mRNA (cDNA clone MGC:99669 IMAGE:2822685), complete cds. ///</p> <p>Homo sapiens small nuclear ribonucleoprotein polypeptides B and B1 (SNRPB), transcript variant 2, mRNA. ///</p> <p>Homo sapiens small nuclear ribonucleoprotein</p>                                                                                                                                                                                                                                                                                                                                       | small nuclear ribonucleoprotein polypeptides B and B1 | 0.003451924 | 1.183670243  |

|                            |                                                                                                                                                                                                                                                                                                                                                                   |                                                               |                   |                      |
|----------------------------|-------------------------------------------------------------------------------------------------------------------------------------------------------------------------------------------------------------------------------------------------------------------------------------------------------------------------------------------------------------------|---------------------------------------------------------------|-------------------|----------------------|
|                            | polypeptides B and B1 (SNRPB), transcript variant 1, mRNA.                                                                                                                                                                                                                                                                                                        |                                                               |                   |                      |
| LSM6                       | U6 snRNA-associated Sm-like protein LSm6 gene:ENSG00000164167 /// Homo sapiens, Sm protein F, clone IMAGE:4390329, mRNA. /// Homo sapiens LSM6 homolog, U6 small nuclear RNA associated (S. cerevisiae) (LSM6), mRNA.                                                                                                                                             | LSM6 homolog, U6 small nuclear RNA associated (S. cerevisiae) | 0.000822<br>123   | 1.436021<br>997      |
| <b>Functional Group 41</b> | <b>Transcript Description</b>                                                                                                                                                                                                                                                                                                                                     | <b>Gene Title</b>                                             | <b>Bayes.In p</b> | <b>Fold</b>          |
| PLAU                       | urokinase plasminogen activator preproprotein gene:ENSG00000122861 /// Plasminogen activator, urokinase gene:ENSG00000122861 /// Plasminogen activator, urokinase gene:ENSG00000122861 /// Homo sapiens plasminogen activator, urokinase, mRNA (cDNA clone MGC:9223 IMAGE:3890980), complete cds. /// Homo sapiens plasminogen activator, urokinase (PLAU), mRNA. | plasminogen activator, urokinase                              | 0.003780<br>029   | -<br>1.172106<br>338 |

|                            |                                                                                                                                                                                                                                                                                                                                                                                                                                                                                                                                                                                                              |                                                                            |                   |                      |
|----------------------------|--------------------------------------------------------------------------------------------------------------------------------------------------------------------------------------------------------------------------------------------------------------------------------------------------------------------------------------------------------------------------------------------------------------------------------------------------------------------------------------------------------------------------------------------------------------------------------------------------------------|----------------------------------------------------------------------------|-------------------|----------------------|
| TMPRSS11E                  | Transmembrane protease, serine 11E<br>gene:ENSG00000087128 ///<br>Transmembrane protease, serine 11E2 gene:ENSG00000173487 ///<br>Homo sapiens cDNA FLJ75331 complete cds, highly similar to Homo sapiens serine protease mRNA. ///<br>Homo sapiens clone DNA68871 serine protease (UNQ742) mRNA, complete cds. /// Homo sapiens transmembrane protease, serine 11E (TMPRSS11E), mRNA.                                                                                                                                                                                                                       | transmembrane protease, serine 11E2 /// transmembrane protease, serine 11E | 2.20E-06          | -<br>1.554814<br>264 |
| PCSK1                      | Neuroendocrine convertase 1<br>gene:ENSG00000175426 ///<br>H.sapiens PC1 (NEC1) mRNA, complete cds. /// Homo sapiens proprotein convertase subtilisin/kexin type 1 (PCSK1), mRNA.                                                                                                                                                                                                                                                                                                                                                                                                                            | proprotein convertase subtilisin/kexin type 1                              | 0.001541<br>315   | -<br>1.474321<br>169 |
| PLAT                       | Isoform 2 of Tissue-type plasminogen activator gene:ENSG00000104368 ///<br>cDNA FLJ59358, highly similar to Tissue-type plasminogen activator gene:ENSG00000104368 ///<br>Isoform 1 of Tissue-type plasminogen activator gene:ENSG00000104368 ///<br>Isoform 3 of Tissue-type plasminogen activator gene:ENSG00000104368 ///<br>Homo sapiens plasminogen activator, tissue, mRNA (cDNA clone MGC:110886 IMAGE:30528441), complete cds. /// Homo sapiens plasminogen activator, tissue (PLAT), transcript variant 3, mRNA. /// Homo sapiens plasminogen activator, tissue (PLAT), transcript variant 1, mRNA. | plasminogen activator, tissue                                              | 1.12245E<br>-05   | -<br>1.317797<br>286 |
| <b>Functional Group 42</b> | <b>Transcript Description</b>                                                                                                                                                                                                                                                                                                                                                                                                                                                                                                                                                                                | <b>Gene Title</b>                                                          | <b>Bayes.In p</b> | <b>Fold</b>          |

|      |                                                                                                                                                                                                                                                                                                                                                                                                                                                                                                                                                                                                                                                                                                                                                                                                                                                                                                                                                                                                                                                                                                                                                                                                                  |                                                           |             |             |
|------|------------------------------------------------------------------------------------------------------------------------------------------------------------------------------------------------------------------------------------------------------------------------------------------------------------------------------------------------------------------------------------------------------------------------------------------------------------------------------------------------------------------------------------------------------------------------------------------------------------------------------------------------------------------------------------------------------------------------------------------------------------------------------------------------------------------------------------------------------------------------------------------------------------------------------------------------------------------------------------------------------------------------------------------------------------------------------------------------------------------------------------------------------------------------------------------------------------------|-----------------------------------------------------------|-------------|-------------|
| CMAS | Isoform 1 of N-acylneuraminatyltransferase<br>gene:ENSG00000111726 /// Homo sapiens cytidine monophosphate N-acetylneuraminic acid synthetase, mRNA (cDNA clone MGC:5424 IMAGE:3448277), complete cds. /// Homo sapiens cytidine monophosphate N-acetylneuraminic acid synthetase (CMAS), mRNA.                                                                                                                                                                                                                                                                                                                                                                                                                                                                                                                                                                                                                                                                                                                                                                                                                                                                                                                  | cytidine monophosphate N-acetylneuraminic acid synthetase | 0.00042861  | 1.199287134 |
| AGL  | Isoform 1 of Glycogen debranching enzyme gene:ENSG00000162688 /// Putative uncharacterized protein AGL (Fragment) gene:ENSG00000162688 /// Isoform 1 of Glycogen debranching enzyme gene:ENSG00000162688 /// Isoform 1 of Glycogen debranching enzyme gene:ENSG00000162688 /// amylo-1, 6-glucosidase, 4-alpha-glucanotransferase isoform 3 gene:ENSG00000162688 /// amylo-1, 6-glucosidase, 4-alpha-glucanotransferase isoform 3 gene:ENSG00000162688 /// Isoform 5 of Glycogen debranching enzyme gene:ENSG00000162688 /// Human glycogen debranching enzyme isoform 4 (AGL) mRNA, alternatively spliced isoform, complete cds. /// Homo sapiens amylo-1, 6-glucosidase, 4-alpha-glucanotransferase (AGL), transcript variant 5, mRNA. /// Homo sapiens amylo-1, 6-glucosidase, 4-alpha-glucanotransferase (AGL), transcript variant 6, mRNA. /// Homo sapiens amylo-1, 6-glucosidase, 4-alpha-glucanotransferase (AGL), transcript variant 3, mRNA. /// Homo sapiens amylo-1, 6-glucosidase, 4-alpha-glucanotransferase (AGL), transcript variant 2, mRNA. /// Homo sapiens amylo-1, 6-glucosidase, 4-alpha-glucanotransferase (AGL), transcript variant 4, mRNA. /// Homo sapiens amylo-1, 6-glucosidase, 4- | amylo-1, 6-glucosidase, 4-alpha-glucanotransferase        | 0.007199741 | 1.175440036 |

|      |                                                                                                                                                                                                                                                                                                                                                                                                                                                                                                                        |              |             |             |
|------|------------------------------------------------------------------------------------------------------------------------------------------------------------------------------------------------------------------------------------------------------------------------------------------------------------------------------------------------------------------------------------------------------------------------------------------------------------------------------------------------------------------------|--------------|-------------|-------------|
|      | alpha-glucanotransferase (AGL), transcript variant 1, mRNA.                                                                                                                                                                                                                                                                                                                                                                                                                                                            |              |             |             |
| GYG2 | <p>Isoform Beta of Glycogenin-2<br/> gene:ENSG00000056998 /// Isoform Alpha of Glycogenin-2<br/> gene:ENSG00000056998 /// Isoform Delta of Glycogenin-2<br/> gene:ENSG00000056998 /// Isoform Gamma of Glycogenin-2<br/> gene:ENSG00000056998 /// Isoform Zeta of Glycogenin-2<br/> gene:ENSG00000056998 /// Isoform Delta of Glycogenin-2<br/> gene:ENSG00000056998 /// Homo sapiens glycogenin-2 alpha (glycogenin-2) mRNA, complete cds.<br/> /// Homo sapiens glycogenin 2 (GYG2), transcript variant 2, mRNA.</p> | glycogenin 2 | 0.008784861 | 1.158471866 |

|                            |                                                                                                                                                                                                                                                                         |                                            |                   |                      |
|----------------------------|-------------------------------------------------------------------------------------------------------------------------------------------------------------------------------------------------------------------------------------------------------------------------|--------------------------------------------|-------------------|----------------------|
|                            | /// Homo sapiens glycogenin 2 (GYG2), transcript variant 1, mRNA.                                                                                                                                                                                                       |                                            |                   |                      |
| GYG1                       | Isoform GN-1 of Glycogenin-1<br>gene:ENSG00000163754 /// Isoform GN-1L of Glycogenin-1<br>gene:ENSG00000163754 /// Isoform GN-1S of Glycogenin-1<br>gene:ENSG00000163754 /// Homo sapiens glycogenin-1L mRNA, complete cds. /// Homo sapiens glycogenin 1 (GYG1), mRNA. | glycogenin 1                               | 0.001347<br>231   | 1.198090<br>579      |
| GBE1                       | 1,4-alpha-glucan-branching enzyme<br>gene:ENSG00000114480 /// Homo sapiens cDNA FLJ43930 fis, clone TESTI4013441, highly similar to 1,4-alpha-glucan branching enzyme (EC 2.4.1.18). /// Homo sapiens glucan (1,4-alpha-), branching enzyme 1 (GBE1), mRNA.             | glucan (1,4-alpha-),<br>branching enzyme 1 | 0.001161<br>591   | -<br>1.181464<br>145 |
| <b>Functional Group 43</b> | <b>Transcript Description</b>                                                                                                                                                                                                                                           | <b>Gene Title</b>                          | <b>Bayes.In p</b> | <b>Fold</b>          |

|         |                                                                                                                                                                                                                                                                                                                                                                                                                                                                                                                                                                                                                                           |                                              |             |              |
|---------|-------------------------------------------------------------------------------------------------------------------------------------------------------------------------------------------------------------------------------------------------------------------------------------------------------------------------------------------------------------------------------------------------------------------------------------------------------------------------------------------------------------------------------------------------------------------------------------------------------------------------------------------|----------------------------------------------|-------------|--------------|
| DNAJA4  | DnaJ (Hsp40) homolog, subfamily A, member 4 isoform 1<br>gene:ENSG00000140403 /// DnaJ homolog subfamily A member 4<br>gene:ENSG00000140403 /// DnaJ homolog subfamily A member 4<br>gene:ENSG00000140403 /// Homo sapiens DnaJ (Hsp40) homolog, subfamily A, member 4, mRNA (cDNA clone MGC:33001 IMAGE:4831235), complete cds. /// Homo sapiens DnaJ (Hsp40) homolog, subfamily A, member 4 (DNAJA4), transcript variant 1, mRNA. /// Homo sapiens DnaJ (Hsp40) homolog, subfamily A, member 4 (DNAJA4), transcript variant 2, mRNA. /// Homo sapiens DnaJ (Hsp40) homolog, subfamily A, member 4 (DNAJA4), transcript variant 3, mRNA. | DnaJ (Hsp40) homolog, subfamily A, member 4  | 0.00145855  | -1.271389224 |
| DNAJB1  | DnaJ homolog subfamily B member 1<br>gene:ENSG00000132002 /// Homo sapiens hsp40 mRNA for heat-shock protein 40, complete cds. /// Homo sapiens DnaJ (Hsp40) homolog, subfamily B, member 1 (DNAJB1), mRNA.                                                                                                                                                                                                                                                                                                                                                                                                                               | DnaJ (Hsp40) homolog, subfamily B, member 1  | 1.03457E-07 | -1.545182101 |
| DNAJC15 | DnaJ homolog subfamily C member 15<br>gene:ENSG00000120675 /// Homo sapiens DnaJ (Hsp40) homolog, subfamily C, member 15, mRNA (cDNA clone MGC:110875 IMAGE:30530999), complete cds. /// Homo sapiens DnaJ (Hsp40) homolog, subfamily C, member 15 (DNAJC15), mRNA.                                                                                                                                                                                                                                                                                                                                                                       | DnaJ (Hsp40) homolog, subfamily C, member 15 | 0.002111086 | 1.248706673  |
| DNAJB4  | DnaJ homolog subfamily B member 4<br>gene:ENSG00000162616 /// Homo sapiens DnaJ (Hsp40) homolog, subfamily B, member 4, mRNA (cDNA clone MGC:17027 IMAGE:4340658), complete cds. /// Homo sapiens DnaJ (Hsp40) homolog, subfamily B, member 4 (DNAJB4), mRNA.                                                                                                                                                                                                                                                                                                                                                                             | DnaJ (Hsp40) homolog, subfamily B, member 4  | 0.008889347 | -1.17899242  |



| Functional Group 44 | Transcript Description                                                                                                                                                                                                                                                                       | Gene Title                       | Bayes.In p      | Fold                 |
|---------------------|----------------------------------------------------------------------------------------------------------------------------------------------------------------------------------------------------------------------------------------------------------------------------------------------|----------------------------------|-----------------|----------------------|
| MYO1D               | Isoform 1 of Myosin-Id<br>gene:ENSG00000176658 /// Isoform 2 of Myosin-Id<br>gene:ENSG00000176658 /// Homo sapiens myosin ID, mRNA (cDNA clone MGC:166833 IMAGE:9007203), complete cds. /// Homo sapiens myosin ID (MYO1D), mRNA.                                                            | myosin ID                        | 0.004287<br>663 | -<br>1.170542<br>076 |
| KIF20A              | Kinesin-like protein KIF20A<br>gene:ENSG00000112984 /// Kinesin-like protein KIF20A<br>gene:ENSG00000112984 /// Homo sapiens kinesin family member 20A, mRNA (cDNA clone MGC:3571 IMAGE:3604291), complete cds. /// Homo sapiens kinesin family member 20A (KIF20A), mRNA.                   | kinesin family member 20A        | 0.000390<br>543 | 1.232560<br>547      |
| DNAL4               | Dynein light chain 4, axonemal<br>gene:ENSG00000100246 /// Dynein, axonemal, light chain 4<br>gene:ENSG00000100246 /// Homo sapiens dynein, axonemal, light chain 4, mRNA (cDNA clone MGC:1838 IMAGE:3543962), complete cds. /// Homo sapiens dynein, axonemal, light chain 4 (DNAL4), mRNA. | dynein, axonemal, light chain 4  | 0.006784<br>268 | 1.230144<br>814      |
| MAP7                | Isoform 1 of Ensconsin<br>gene:ENSG00000135525 /// Putative uncharacterized protein MAP7<br>gene:ENSG00000135525 /// Homo sapiens microtubule-associated protein 7, mRNA (cDNA clone MGC:34092 IMAGE:5222987), complete cds. /// Homo sapiens microtubule-associated protein 7 (MAP7), mRNA. | microtubule-associated protein 7 | 0.000184<br>608 | 1.255111<br>882      |
| KIF3C               | Kinesin-like protein KIF3C<br>gene:ENSG00000084731 /// Kinesin-like protein KIF3C<br>gene:ENSG00000084731 /// Homo sapiens kinesin-related protein (KIF3C) mRNA, complete cds. ///                                                                                                           | kinesin family member 3C         | 0.005222<br>742 | 1.217588<br>424      |

|          |                                                                                                                                                                                                                                                                                                                                                                                                                               |                                                                                                    |             |             |
|----------|-------------------------------------------------------------------------------------------------------------------------------------------------------------------------------------------------------------------------------------------------------------------------------------------------------------------------------------------------------------------------------------------------------------------------------|----------------------------------------------------------------------------------------------------|-------------|-------------|
|          | Homo sapiens kinesin family member 3C (KIF3C), mRNA.                                                                                                                                                                                                                                                                                                                                                                          |                                                                                                    |             |             |
| KIF21A   | Isoform 1 of Kinesin-like protein KIF21A gene:ENSG00000139116 /// Isoform 4 of Kinesin-like protein KIF21A gene:ENSG00000139116 /// Isoform 3 of Kinesin-like protein KIF21A gene:ENSG00000139116 /// Isoform 2 of Kinesin-like protein KIF21A gene:ENSG00000139116 /// Homo sapiens kinesin family member 21A (KIF21A) mRNA, complete cds, alternatively spliced. /// Homo sapiens kinesin family member 21A (KIF21A), mRNA. | kinesin family member 21A                                                                          | 0.008568736 | 1.197613115 |
| KIF4A    | Isoform 2 of Chromosome-associated kinesin KIF4A gene:ENSG00000090889 /// Isoform 1 of Chromosome-associated kinesin KIF4A gene:ENSG00000090889 /// Homo sapiens kinesin superfamily motor KIF4 mRNA, complete cds. /// Homo sapiens kinesin family member 4A (KIF4A), mRNA.                                                                                                                                                  | kinesin family member 4A                                                                           | 0.00023618  | 1.303272785 |
| DYNC1LI1 | Cytoplasmic dynein 1 light intermediate chain 1 gene:ENSG00000144635 /// Homo sapiens zinc finger, RAN-binding domain containing 3, mRNA (cDNA clone IMAGE:5575956), complete cds. /// Homo sapiens dynein, cytoplasmic 1, light intermediate chain 1, mRNA (cDNA clone MGC:149683 IMAGE:40117391), complete cds. /// Homo sapiens dynein, cytoplasmic 1, light intermediate chain 1 (DYNC1LI1), mRNA.                        | zinc finger, RAN-binding domain containing 3 /// dynein, cytoplasmic 1, light intermediate chain 1 | 0.008493891 | 1.164885701 |

|                                |                                                                                                                                                                                                                                                                                                                                                             |                                 |                       |                      |
|--------------------------------|-------------------------------------------------------------------------------------------------------------------------------------------------------------------------------------------------------------------------------------------------------------------------------------------------------------------------------------------------------------|---------------------------------|-----------------------|----------------------|
| KIF22                          | cdna:known<br>supercontig::NT_113929:89369:9744<br>3:1 gene:ENSG00000215670 /// OriP<br>binding protein like gene product<br>gene:ENSG00000215669 /// Kinesin-<br>like protein KIF22<br>gene:ENSG00000079616 /// Homo<br>sapiens mRNA for kinesin-like DNA<br>binding protein, complete cds. ///<br>Homo sapiens kinesin family member<br>22 (KIF22), mRNA. | kinesin family member<br>22     | 0.003496<br>917       | 1.172558<br>89       |
| <b>Functional<br/>Group 45</b> | <b>Transcript Description</b>                                                                                                                                                                                                                                                                                                                               | <b>Gene Title</b>               | <b>Bayes.In<br/>p</b> | <b>Fold</b>          |
| UNC5B                          | Isoform 1 of Netrin receptor UNC5B<br>gene:ENSG00000107731 /// Isoform<br>2 of Netrin receptor UNC5B<br>gene:ENSG00000107731 /// Homo<br>sapiens p53RDL1 mRNA for p53-<br>regulated receptor for death and life,<br>complete cds. /// Homo sapiens unc-5<br>homolog B (C. elegans) (UNC5B),<br>mRNA.                                                        | unc-5 homolog B (C.<br>elegans) | 0.001325<br>655       | -<br>1.218302<br>468 |
| IL7R                           | Isoform H20 of Interleukin-7 receptor<br>subunit alpha<br>gene:ENSG00000168685 /// Isoform<br>H6 of Interleukin-7 receptor subunit<br>alpha gene:ENSG00000168685 ///<br>Homo sapiens interleukin 7 receptor,<br>mRNA (cDNA clone MGC:79450<br>IMAGE:6971846), complete cds. ///<br>Homo sapiens interleukin 7 receptor<br>(IL7R), mRNA.                     | interleukin 7 receptor          | 3.25743E<br>-05       | -<br>1.560892<br>995 |

|         |                                                                                                                                                                                                                                                                                                                                                                                                                                                                                                                                                                                                                                                                                                                                                                                                                                                                                                                                                    |                                                                                     |                 |                      |
|---------|----------------------------------------------------------------------------------------------------------------------------------------------------------------------------------------------------------------------------------------------------------------------------------------------------------------------------------------------------------------------------------------------------------------------------------------------------------------------------------------------------------------------------------------------------------------------------------------------------------------------------------------------------------------------------------------------------------------------------------------------------------------------------------------------------------------------------------------------------------------------------------------------------------------------------------------------------|-------------------------------------------------------------------------------------|-----------------|----------------------|
| IL6ST   | <p>Isoform 1 of Interleukin-6 receptor subunit beta gene:ENSG00000134352<br/> /// Isoform 1 of Interleukin-6 receptor subunit beta gene:ENSG00000134352<br/> /// IL6ST nirs variant 4 gene:ENSG00000134352<br/> /// IL6ST nirs variant 3 gene:ENSG00000134352<br/> /// Isoform 1 of Interleukin-6 receptor subunit beta gene:ENSG00000134352<br/> /// IL6ST nirs variant 6 gene:ENSG00000134352<br/> /// Isoform 2 of Interleukin-6 receptor subunit beta gene:ENSG00000134352<br/> /// IL6ST nirs variant 5 gene:ENSG00000134352<br/> /// IL6ST nirs variant 1 gene:ENSG00000134352<br/> /// IL6ST nirs variant 2 gene:ENSG00000134352<br/> /// Human membrane glycoprotein gp130 mRNA, complete cds. // Homo sapiens interleukin 6 signal transducer (gp130, oncostatin M receptor) (IL6ST), transcript variant 2, mRNA. // Homo sapiens interleukin 6 signal transducer (gp130, oncostatin M receptor) (IL6ST), transcript variant 1, mRNA.</p> | interleukin 6 signal transducer (gp130, oncostatin M receptor)                      | 0.004311<br>509 | -<br>1.202321<br>214 |
| SLC11A2 | <p>Isoform 2 of Natural resistance-associated macrophage protein 2 gene:ENSG00000110911<br/> /// Isoform 1 of Natural resistance-associated macrophage protein 2 gene:ENSG00000110911<br/> /// Divalent metal transporter gene:ENSG00000110911<br/> /// Homo sapiens cDNA FLJ46799 fis, clone TRACH3031678, highly similar to Natural resistance-associated macrophage protein 2. // Homo sapiens solute carrier family 11 (proton-coupled divalent metal ion transporters), member 2 (SLC11A2), mRNA.</p>                                                                                                                                                                                                                                                                                                                                                                                                                                         | solute carrier family 11 (proton-coupled divalent metal ion transporters), member 2 | 0.001989<br>436 | 1.200926<br>252      |

|        |                                                                                                                                                                                                                                                                                                                                                                                                                                                                         |                                                              |             |                      |
|--------|-------------------------------------------------------------------------------------------------------------------------------------------------------------------------------------------------------------------------------------------------------------------------------------------------------------------------------------------------------------------------------------------------------------------------------------------------------------------------|--------------------------------------------------------------|-------------|----------------------|
| GABRE  | Gamma-aminobutyric acid receptor subunit epsilon<br>gene:ENSG00000102287 /// Putative uncharacterized protein GABRE<br>gene:ENSG00000102287 /// Putative uncharacterized protein GABRE<br>gene:ENSG00000102287 /// 42 kDa protein gene:ENSG00000102287 /// Homo sapiens gamma-aminobutyric acid (GABA) A receptor, epsilon, mRNA (cDNA clone MGC:26504 IMAGE:4798754), complete cds. /// Homo sapiens gamma-aminobutyric acid (GABA) A receptor, epsilon (GABRE), mRNA. | gamma-aminobutyric acid (GABA) A receptor, epsilon           | 4.29924E-10 | -<br>2.024622<br>21  |
| CHRNA9 | Neuronal acetylcholine receptor subunit alpha-9<br>gene:ENSG00000174343 /// Homo sapiens cholinergic receptor, nicotinic, alpha 9, mRNA (cDNA clone MGC:142109 IMAGE:8322601), complete cds. /// Homo sapiens cholinergic receptor, nicotinic, alpha 9 (CHRNA9), mRNA.                                                                                                                                                                                                  | cholinergic receptor, nicotinic, alpha 9                     | 0.008365153 | -<br>1.272045<br>213 |
| ITGA2  | Integrin alpha-2<br>gene:ENSG00000164171 /// Homo sapiens integrin, alpha 2 (CD49B, alpha 2 subunit of VLA-2 receptor) (ITGA2), mRNA.                                                                                                                                                                                                                                                                                                                                   | integrin, alpha 2 (CD49B, alpha 2 subunit of VLA-2 receptor) | 1.87799E-05 | -<br>1.323995<br>521 |

|          |                                                                                                                                                                                                                                                                                                                                                                                                                                                                                                                                                                                                                                                                                                                                                                                                                                                                                                                                                                                                                                                                                                                                                                                                                                                                                                            |                                                       |             |              |
|----------|------------------------------------------------------------------------------------------------------------------------------------------------------------------------------------------------------------------------------------------------------------------------------------------------------------------------------------------------------------------------------------------------------------------------------------------------------------------------------------------------------------------------------------------------------------------------------------------------------------------------------------------------------------------------------------------------------------------------------------------------------------------------------------------------------------------------------------------------------------------------------------------------------------------------------------------------------------------------------------------------------------------------------------------------------------------------------------------------------------------------------------------------------------------------------------------------------------------------------------------------------------------------------------------------------------|-------------------------------------------------------|-------------|--------------|
| HLA-DQB2 | <p>Major histocompatibility complex, class II, DQ beta 2<br/> gene:ENSG00000215008 /// Major histocompatibility complex, class II, DQ beta 2<br/> gene:ENSG00000215008 /// Major histocompatibility complex, class II, DQ beta 2<br/> gene:ENSG00000215008 /// Major histocompatibility complex, class II, DQ beta 2<br/> gene:ENSG00000215008 /// Major histocompatibility complex, class II, DQ beta 2<br/> gene:ENSG00000196610 /// Major histocompatibility complex, class II, DQ beta 2<br/> gene:ENSG00000196610 /// Major histocompatibility complex, class II, DQ beta 2<br/> gene:ENSG00000196610 /// cdna:known<br/> chromosome:NCBI36:c6_QBL:327954 51:32802909:-1<br/> gene:ENSG00000196610 /// Major histocompatibility complex, class II, DQ beta 2<br/> gene:ENSG00000204275 /// Major histocompatibility complex, class II, DQ beta 2<br/> gene:ENSG00000204275 /// Major histocompatibility complex, class II, DQ beta 2<br/> gene:ENSG00000204275 /// Major histocompatibility complex, class II, DQ beta 2<br/> gene:ENSG00000204275 /// Homo sapiens cDNA FLJ40688 fis, clone THYMU2024185, highly similar to HLA class II histocompatibility antigen, DX beta chain precursor. /// Homo sapiens major histocompatibility complex, class II, DQ beta 2 (HLA-DQB2), non-coding RNA.</p> | major histocompatibility complex, class II, DQ beta 2 | 0.003586271 | -1.177848967 |
|----------|------------------------------------------------------------------------------------------------------------------------------------------------------------------------------------------------------------------------------------------------------------------------------------------------------------------------------------------------------------------------------------------------------------------------------------------------------------------------------------------------------------------------------------------------------------------------------------------------------------------------------------------------------------------------------------------------------------------------------------------------------------------------------------------------------------------------------------------------------------------------------------------------------------------------------------------------------------------------------------------------------------------------------------------------------------------------------------------------------------------------------------------------------------------------------------------------------------------------------------------------------------------------------------------------------------|-------------------------------------------------------|-------------|--------------|

|             |                                                                                                                                                                                                                                                                                                                                                                                                                                                                                                                                                                                                                                                                                                                                                                                                                                                                                                                                                                                                                                                                                                                                                                                                       |                                                   |                    |                    |
|-------------|-------------------------------------------------------------------------------------------------------------------------------------------------------------------------------------------------------------------------------------------------------------------------------------------------------------------------------------------------------------------------------------------------------------------------------------------------------------------------------------------------------------------------------------------------------------------------------------------------------------------------------------------------------------------------------------------------------------------------------------------------------------------------------------------------------------------------------------------------------------------------------------------------------------------------------------------------------------------------------------------------------------------------------------------------------------------------------------------------------------------------------------------------------------------------------------------------------|---------------------------------------------------|--------------------|--------------------|
| <p>MICA</p> | <p>MHC class I polypeptide-related sequence A gene:ENSG00000184444<br/> /// Putative uncharacterized protein gene:ENSG00000184444 /// MHC class I polypeptide-related sequence A gene:ENSG00000184444 ///<br/> cdna:known<br/> chromosome:NCBI36:c6_COX:31509120:31520840:1<br/> gene:ENSG00000184444 /// MHC class I polypeptide-related sequence A gene:ENSG00000183214 /// MHC class I polypeptide-related sequence A gene:ENSG00000204520 ///<br/> Putative uncharacterized protein gene:ENSG00000204520 /// MHC class I polypeptide-related sequence A gene:ENSG00000204520 ///<br/> cdna:known<br/> chromosome:NCBI36:6:31479389:31490895:1 gene:ENSG00000204520 ///<br/> cdna:known<br/> chromosome:NCBI36:6:31484427:31491015:1 gene:ENSG00000204520 ///<br/> Homo sapiens cDNA FLJ60820 complete cds, highly similar to Homo sapiens MHC class I polypeptide-related sequence A (MICA), mRNA.<br/> /// Homo sapiens MHC class I polypeptide-related sequence A (MICA), mRNA.</p> | <p>MHC class I polypeptide-related sequence A</p> | <p>0.405683878</p> | <p>1.047499821</p> |
|-------------|-------------------------------------------------------------------------------------------------------------------------------------------------------------------------------------------------------------------------------------------------------------------------------------------------------------------------------------------------------------------------------------------------------------------------------------------------------------------------------------------------------------------------------------------------------------------------------------------------------------------------------------------------------------------------------------------------------------------------------------------------------------------------------------------------------------------------------------------------------------------------------------------------------------------------------------------------------------------------------------------------------------------------------------------------------------------------------------------------------------------------------------------------------------------------------------------------------|---------------------------------------------------|--------------------|--------------------|

|       |                                                                                                                                                                                                                                                                                                                                                                                                                                                                                                                                                                                                                                                                                                                                                                                                                                                                                                                                                                                                                                                                                                                                                                                                                                                                                                                                                                                                                                                                                                                                                                                                                                  |                                                                                                                                                                                                                           |                 |                      |
|-------|----------------------------------------------------------------------------------------------------------------------------------------------------------------------------------------------------------------------------------------------------------------------------------------------------------------------------------------------------------------------------------------------------------------------------------------------------------------------------------------------------------------------------------------------------------------------------------------------------------------------------------------------------------------------------------------------------------------------------------------------------------------------------------------------------------------------------------------------------------------------------------------------------------------------------------------------------------------------------------------------------------------------------------------------------------------------------------------------------------------------------------------------------------------------------------------------------------------------------------------------------------------------------------------------------------------------------------------------------------------------------------------------------------------------------------------------------------------------------------------------------------------------------------------------------------------------------------------------------------------------------------|---------------------------------------------------------------------------------------------------------------------------------------------------------------------------------------------------------------------------|-----------------|----------------------|
| HLA-A | <p>Major histocompatibility complex, class I, C gene:ENSG00000206435 ///</p> <p>cdna:known<br/>chromosome:NCBI36:c6_COX:313748 64:31378212:-1<br/>gene:ENSG00000206435 /// HLA class I histocompatibility antigen, B-8 alpha chain gene:ENSG00000206341 ///</p> <p>Major histocompatibility complex class I C gene:ENSG00000206452 ///</p> <p>MHC class I antigen<br/>gene:ENSG00000206452 /// Major histocompatibility complex class I C gene:ENSG00000206452 /// Major histocompatibility complex class I C gene:ENSG00000206452 /// MHC class I antigen<br/>gene:ENSG00000206452 /// MHC class I antigen<br/>gene:ENSG00000206452 /// HLA-Cw12 gene:ENSG00000206452 ///</p> <p>HLA class I histocompatibility antigen, B-18 alpha chain<br/>gene:ENSG00000206450 ///</p> <p>cdna:known<br/>chromosome:NCBI36:c6_QBL:314569 16:31457994:-1<br/>gene:ENSG00000206450 /// Major histocompatibility complex, class I, C gene:ENSG00000204525 /// Major histocompatibility complex, class I, C gene:ENSG00000204525 /// HLA class I histocompatibility antigen, Cw-7 alpha chain gene:ENSG00000204525 ///</p> <p>Major histocompatibility complex, class I, C gene:ENSG00000204525 ///</p> <p>HLA class I histocompatibility antigen, B-7 alpha chain<br/>gene:ENSG00000204525 /// Homo sapiens major histocompatibility complex, class I, C, mRNA (cDNA clone MGC:2285 IMAGE:3345005),</p> | <p>major histocompatibility complex, class I, C ///</p> <p>major histocompatibility complex, class I, B ///</p> <p>MHC class I polypeptide-related sequence A ///</p> <p>major histocompatibility complex, class I, A</p> | 0.006852<br>189 | -<br>1.144039<br>305 |
|-------|----------------------------------------------------------------------------------------------------------------------------------------------------------------------------------------------------------------------------------------------------------------------------------------------------------------------------------------------------------------------------------------------------------------------------------------------------------------------------------------------------------------------------------------------------------------------------------------------------------------------------------------------------------------------------------------------------------------------------------------------------------------------------------------------------------------------------------------------------------------------------------------------------------------------------------------------------------------------------------------------------------------------------------------------------------------------------------------------------------------------------------------------------------------------------------------------------------------------------------------------------------------------------------------------------------------------------------------------------------------------------------------------------------------------------------------------------------------------------------------------------------------------------------------------------------------------------------------------------------------------------------|---------------------------------------------------------------------------------------------------------------------------------------------------------------------------------------------------------------------------|-----------------|----------------------|



|  |                                                                                                                                                                                                                                                                                                                                                                                                                                                                               |  |  |  |
|--|-------------------------------------------------------------------------------------------------------------------------------------------------------------------------------------------------------------------------------------------------------------------------------------------------------------------------------------------------------------------------------------------------------------------------------------------------------------------------------|--|--|--|
|  | <p>complete cds. /// Homo sapiens major histocompatibility complex, class I, B, mRNA (cDNA clone MGC:17189 IMAGE:4344323), complete cds. /// Homo sapiens MHC class I polypeptide-related sequence A, mRNA (cDNA clone MGC:111087 IMAGE:30386550), complete cds. /// Homo sapiens HLA-A24AK mRNA, complete cds. /// Homo sapiens major histocompatibility complex, class I, C (HLA-C), mRNA. /// Homo sapiens major histocompatibility complex, class I, B (HLA-B), mRNA.</p> |  |  |  |
|--|-------------------------------------------------------------------------------------------------------------------------------------------------------------------------------------------------------------------------------------------------------------------------------------------------------------------------------------------------------------------------------------------------------------------------------------------------------------------------------|--|--|--|

|       |                                                                                                                                                                                                                                                                                                                                                                                                                                                                                                                                                                                                                                                                                                                                                                                                                                                                                                                                                                                                                                                                                                                                                                                                                                                                                                                                                                                                                                                                                                                                                                                                                                                                                             |                                                                                                                                                                   |            |                  |
|-------|---------------------------------------------------------------------------------------------------------------------------------------------------------------------------------------------------------------------------------------------------------------------------------------------------------------------------------------------------------------------------------------------------------------------------------------------------------------------------------------------------------------------------------------------------------------------------------------------------------------------------------------------------------------------------------------------------------------------------------------------------------------------------------------------------------------------------------------------------------------------------------------------------------------------------------------------------------------------------------------------------------------------------------------------------------------------------------------------------------------------------------------------------------------------------------------------------------------------------------------------------------------------------------------------------------------------------------------------------------------------------------------------------------------------------------------------------------------------------------------------------------------------------------------------------------------------------------------------------------------------------------------------------------------------------------------------|-------------------------------------------------------------------------------------------------------------------------------------------------------------------|------------|------------------|
| HLA-C | <p>Major histocompatibility complex, class I, C gene:ENSG00000206435 ///</p> <p>cdna:known<br/>chromosome:NCBI36:c6_COX:313748 64:31378212:-1<br/>gene:ENSG00000206435 ///</p> <p>cdna:known<br/>chromosome:NCBI36:c6_COX:313748 64:31378212:-1<br/>gene:ENSG00000206435 ///</p> <p>HLA class I histocompatibility antigen, B-8 alpha chain gene:ENSG00000206341 ///</p> <p>Major histocompatibility complex class I C gene:ENSG00000206452 ///</p> <p>MHC class I antigen<br/>gene:ENSG00000206452 ///</p> <p>Major histocompatibility complex class I C gene:ENSG00000206452 ///</p> <p>Major histocompatibility complex class I C gene:ENSG00000206452 ///</p> <p>MHC class I antigen<br/>gene:ENSG00000206452 ///</p> <p>MHC class I antigen<br/>gene:ENSG00000206452 ///</p> <p>HLA-Cw12 gene:ENSG00000206452 ///</p> <p>Major histocompatibility complex, class I, C gene:ENSG00000204525 ///</p> <p>Major histocompatibility complex, class I, C gene:ENSG00000204525 ///</p> <p>HLA class I histocompatibility antigen, Cw-7 alpha chain<br/>gene:ENSG00000204525 ///</p> <p>Major histocompatibility complex, class I, C gene:ENSG00000204525 ///</p> <p>Homo sapiens major histocompatibility complex, class I, B, mRNA (cDNA clone MGC:17189 IMAGE:4344323), complete cds. ///</p> <p>Homo sapiens major histocompatibility complex, class I, C, mRNA (cDNA clone MGC:24960 IMAGE:4780246), complete cds. ///</p> <p>Homo sapiens MHC</p> | <p>major histocompatibility complex, class I, B ///</p> <p>major histocompatibility complex, class I, C ///</p> <p>MHC class I polypeptide-related sequence A</p> | 0.05510185 | -<br>1.114334938 |
|-------|---------------------------------------------------------------------------------------------------------------------------------------------------------------------------------------------------------------------------------------------------------------------------------------------------------------------------------------------------------------------------------------------------------------------------------------------------------------------------------------------------------------------------------------------------------------------------------------------------------------------------------------------------------------------------------------------------------------------------------------------------------------------------------------------------------------------------------------------------------------------------------------------------------------------------------------------------------------------------------------------------------------------------------------------------------------------------------------------------------------------------------------------------------------------------------------------------------------------------------------------------------------------------------------------------------------------------------------------------------------------------------------------------------------------------------------------------------------------------------------------------------------------------------------------------------------------------------------------------------------------------------------------------------------------------------------------|-------------------------------------------------------------------------------------------------------------------------------------------------------------------|------------|------------------|

|        |                                                                                                                                                                                                                                                                                                                                                            |                                                    |                         |                               |
|--------|------------------------------------------------------------------------------------------------------------------------------------------------------------------------------------------------------------------------------------------------------------------------------------------------------------------------------------------------------------|----------------------------------------------------|-------------------------|-------------------------------|
|        | <p>class I polypeptide-related sequence A, mRNA (cDNA clone MGC:111087 IMAGE:30386550), complete cds. /// Homo sapiens major histocompatibility complex, class I, C (HLA-C), mRNA.</p>                                                                                                                                                                     |                                                    |                         |                               |
| DCBLD2 | <p>Isoform 1 of Discoidin, CUB and LCCL domain-containing protein 2 gene:ENSG00000057019 /// Isoform 2 of Discoidin, CUB and LCCL domain-containing protein 2 gene:ENSG00000057019 /// 42 kDa protein gene:ENSG00000057019 /// Homo sapiens mRNA for CLCP1, complete cds. /// Homo sapiens discoidin, CUB and LCCL domain containing 2 (DCBLD2), mRNA.</p> | <p>discoidin, CUB and LCCL domain containing 2</p> | <p>0.004394<br/>744</p> | <p>-<br/>1.154840<br/>632</p> |

|         |                                                                                                                                                                                                                                                                                                                                                                                                      |                                                           |             |              |
|---------|------------------------------------------------------------------------------------------------------------------------------------------------------------------------------------------------------------------------------------------------------------------------------------------------------------------------------------------------------------------------------------------------------|-----------------------------------------------------------|-------------|--------------|
| COL17A1 | Isoform 2 of Collagen alpha-1(XVII) chain gene:ENSG00000065618 /// Isoform 1 of Collagen alpha-1(XVII) chain gene:ENSG00000065618 /// Collagen type XVII alpha 1 gene:ENSG00000065618 /// Homo sapiens collagen, type XVII, alpha 1 (COL17A1), mRNA.                                                                                                                                                 | collagen, type XVII, alpha 1                              | 2.82636E-11 | -1.968830888 |
| SLC19A2 | Solute carrier family 19 (Thiamine transporter), member 2 gene:ENSG00000117479 /// Thiamine transporter 1 gene:ENSG00000117479 /// Solute carrier family 19 (Thiamine transporter), member 2, isoform CRA_c gene:ENSG00000117479 /// Homo sapiens high affinity thiamine transporter mRNA, complete cds. /// Homo sapiens solute carrier family 19 (thiamine transporter), member 2 (SLC19A2), mRNA. | solute carrier family 19 (thiamine transporter), member 2 | 0.009821935 | 1.173602075  |
| PTAFR   | Platelet-activating factor receptor gene:ENSG00000169403 /// Platelet-activating factor receptor gene:ENSG00000169403 /// cdna:known chromosome:NCBI36:1:28392629:28393024:-1 gene:ENSG00000215903 /// platelet-activating factor receptor [human, heart ventricle, mRNA Partial, 1541 nt]. /// Homo sapiens platelet-activating factor receptor (PTAFR), mRNA.                                      | platelet-activating factor receptor                       | 0.007269296 | -1.226927777 |
| PCDHB5  | Protocadherin beta-5 gene:ENSG00000113209 /// Homo sapiens protocadherin beta 5, mRNA (cDNA clone MGC:2649 IMAGE:3528826), complete cds. /// Homo sapiens protocadherin beta 5 (PCDHB5), mRNA.                                                                                                                                                                                                       | protocadherin beta 5                                      | 0.004059543 | 1.170733987  |
| CCKBR   | Isoform 1 of Gastrin/cholecystokinin type B receptor gene:ENSG00000110148 /// Homo sapiens CCK-B/gastrin receptor mRNA, complete cds; alternatively spliced. /// Homo sapiens cholecystokinin B receptor (CCKBR), mRNA.                                                                                                                                                                              | cholecystokinin B receptor                                | 0.007359642 | 1.256475897  |

|        |                                                                                                                                                                                                                                                                                                                           |                                                      |             |              |
|--------|---------------------------------------------------------------------------------------------------------------------------------------------------------------------------------------------------------------------------------------------------------------------------------------------------------------------------|------------------------------------------------------|-------------|--------------|
| MCHR1  | G-protein coupled receptor 24 isoform 1 gene:ENSG00000128285 /// Melanin-concentrating hormone receptor 1 gene:ENSG00000128285 /// Homo sapiens G protein-coupled receptor 24 (GPR24) mRNA, complete cds. /// Homo sapiens melanin-concentrating hormone receptor 1 (MCHR1), mRNA.                                        | melanin-concentrating hormone receptor 1             | 0.004686217 | -1.230678471 |
| ICAM1  | Intercellular adhesion molecule 1 gene:ENSG00000090339 /// Human major group rhinovirus receptor (HRV) mRNA, complete cds. /// Homo sapiens intercellular adhesion molecule 1 (ICAM1), mRNA.                                                                                                                              | intercellular adhesion molecule 1                    | 7.61225E-05 | -1.515303835 |
| PODXL  | Podocalyxin-like protein 1 gene:ENSG00000128567 /// podocalyxin-like isoform 1 precursor gene:ENSG00000128567 /// Homo sapiens podocalyxin-like protein mRNA, complete cds. /// Homo sapiens podocalyxin-like (PODXL), transcript variant 1, mRNA. /// Homo sapiens podocalyxin-like (PODXL), transcript variant 2, mRNA. | podocalyxin-like                                     | 0.001142461 | 1.219198904  |
| LGI2   | Leucine-rich repeat LGI family member 2 gene:ENSG00000153012 /// 22 kDa protein gene:ENSG00000153012 /// Homo sapiens leucine-rich repeat LGI family, member 2, mRNA (cDNA clone MGC:126808 IMAGE:8069265), complete cds. /// Homo sapiens leucine-rich repeat LGI family, member 2 (LGI2), mRNA.                         | leucine-rich repeat LGI family, member 2             | 0.005632471 | 1.219235768  |
| TNFSF9 | Tumor necrosis factor ligand superfamily member 9 gene:ENSG00000125657 /// Human receptor 4-1BB ligand mRNA, complete cds. /// Homo sapiens tumor necrosis factor (ligand) superfamily, member 9 (TNFSF9), mRNA.                                                                                                          | tumor necrosis factor (ligand) superfamily, member 9 | 6.73812E-05 | -1.368642193 |

|        |                                                                                                                                                                                                                                                                                                                |                                                         |                 |                      |
|--------|----------------------------------------------------------------------------------------------------------------------------------------------------------------------------------------------------------------------------------------------------------------------------------------------------------------|---------------------------------------------------------|-----------------|----------------------|
| GPC1   | Glypican-1 gene:ENSG00000063660<br>/// Human mRNA for heparan sulfate proteoglycan (glypican). /// Homo sapiens glypican 1 (GPC1), mRNA.                                                                                                                                                                       | glypican 1                                              | 0.000536<br>077 | -<br>1.254215<br>314 |
| EPHB1  | Isoform 1 of Ephrin type-B receptor 1 gene:ENSG00000154928 /// Isoform 4 of Ephrin type-B receptor 1 gene:ENSG00000154928 /// Homo sapiens (clone FBK III 16) protein tyrosine kinase (NET PTK) mRNA, complete cds. /// Homo sapiens EPH receptor B1 (EPHB1), mRNA.                                            | EPH receptor B1                                         | 0.000880<br>803 | -<br>1.270478<br>492 |
| CDH11  | Isoform 2 of Cadherin-11 gene:ENSG00000140937 /// Isoform 1 of Cadherin-11 gene:ENSG00000140937 /// Isoform 2 of Cadherin-11 gene:ENSG00000140937 /// Homo sapiens mRNA for OB-cadherin-2, complete cds. /// Homo sapiens cadherin 11, type 2, OB-cadherin (osteoblast) (CDH11), mRNA.                         | cadherin 11, type 2, OB-cadherin (osteoblast)           | 0.000459<br>146 | -<br>1.256076<br>8   |
| SELPLG | P-selectin glycoprotein ligand 1 gene:ENSG00000110876 /// selectin P ligand gene:ENSG00000110876 /// Homo sapiens selectin P ligand, mRNA (cDNA clone MGC:34401 IMAGE:5180824), complete cds. /// Homo sapiens selectin P ligand (SELPLG), mRNA.                                                               | selectin P ligand                                       | 1.53006E<br>-05 | -<br>1.545134<br>17  |
| CDH10  | Cadherin-10 gene:ENSG00000040731 /// Homo sapiens CDH10 mRNA for cadherin-10, complete cds. /// Homo sapiens cadherin 10, type 2 (T2-cadherin) (CDH10), mRNA.                                                                                                                                                  | cadherin 10, type 2 (T2-cadherin)                       | 0.000193<br>699 | -<br>1.496845<br>555 |
| GPRC5A | Retinoic acid-induced protein 3 gene:ENSG00000013588 /// Homo sapiens cDNA FLJ16117 fis, clone ASTRO2003632, highly similar to Retinoic acid-induced protein 3 (G-proteincoupled receptor family C group 5 member A). /// Homo sapiens G protein-coupled receptor, family C, group 5, member A (GPRC5A), mRNA. | G protein-coupled receptor, family C, group 5, member A | 4.48256E<br>-06 | -<br>1.572536<br>281 |

|        |                                                                                                                                                                                                                                                                        |                                                      |                 |                      |
|--------|------------------------------------------------------------------------------------------------------------------------------------------------------------------------------------------------------------------------------------------------------------------------|------------------------------------------------------|-----------------|----------------------|
| NPY1R  | Neuropeptide Y receptor type 1<br>gene:ENSG00000164128 /// Human neuropeptide Y receptor Y1 (NPYY1) mRNA, exon 2-3 and complete cds. /// Homo sapiens neuropeptide Y receptor Y1 (NPY1R), mRNA.                                                                        | neuropeptide Y receptor Y1                           | 0.001569<br>123 | -<br>1.244647<br>364 |
| OR52N4 | Olfactory receptor 52N4<br>gene:ENSG00000181074 /// Homo sapiens olfactory receptor, family 52, subfamily N, member 4, mRNA (cDNA clone MGC:168654 IMAGE:9021031), complete cds. /// Homo sapiens olfactory receptor, family 52, subfamily N, member 4 (OR52N4), mRNA. | olfactory receptor, family 52, subfamily N, member 4 | 0.000471<br>799 | -<br>1.489677<br>33  |
| AREG   | Amphiregulin<br>gene:ENSG00000109321 /// Amphiregulin<br>gene:ENSG00000109321 /// Amphiregulin<br>gene:ENSG00000205595 /// Homo sapiens amphiregulin, mRNA (cDNA clone MGC:13647 IMAGE:4277616), complete cds. /// Homo sapiens amphiregulin (AREG), mRNA.             | amphiregulin                                         | 7.1454E-<br>13  | -<br>2.274668<br>861 |
| GPR39  | Probable G-protein coupled receptor 39<br>gene:ENSG00000183840 /// Homo sapiens G protein-coupled receptor 39 (GPR39) mRNA, complete cds. /// Homo sapiens G protein-coupled receptor 39 (GPR39), mRNA.                                                                | G protein-coupled receptor 39                        | 1.90394E<br>-05 | 1.580011<br>466      |

|       |                                                                                                                                                                                                                                                                                                                                                                                                                                                                                                                                                                                                                                                                                                                                                                                                                                                                                                                                                                                                                                 |                                             |                 |                      |
|-------|---------------------------------------------------------------------------------------------------------------------------------------------------------------------------------------------------------------------------------------------------------------------------------------------------------------------------------------------------------------------------------------------------------------------------------------------------------------------------------------------------------------------------------------------------------------------------------------------------------------------------------------------------------------------------------------------------------------------------------------------------------------------------------------------------------------------------------------------------------------------------------------------------------------------------------------------------------------------------------------------------------------------------------|---------------------------------------------|-----------------|----------------------|
| CD44  | <p>CD44 antigen isoform 5 precursor<br/> gene:ENSG00000026508 /// Isoform<br/> CD44 of CD44 antigen<br/> gene:ENSG00000026508 /// Isoform<br/> 4 of CD44 antigen<br/> gene:ENSG00000026508 /// Isoform<br/> 10 of CD44 antigen<br/> gene:ENSG00000026508 /// Isoform<br/> 12 of CD44 antigen<br/> gene:ENSG00000026508 /// Putative<br/> uncharacterized protein CD44<br/> gene:ENSG00000026508 /// Homo<br/> sapiens mRNA; cDNA DKFZp451K1918<br/> (from clone DKFZp451K1918);<br/> complete cds. /// Homo sapiens CD44<br/> molecule (Indian blood group)<br/> (CD44), transcript variant 1, mRNA.<br/> /// Homo sapiens CD44 molecule<br/> (Indian blood group) (CD44),<br/> transcript variant 2, mRNA. /// Homo<br/> sapiens CD44 molecule (Indian blood<br/> group) (CD44), transcript variant 3,<br/> mRNA. /// Homo sapiens CD44<br/> molecule (Indian blood group)<br/> (CD44), transcript variant 4, mRNA.<br/> /// Homo sapiens CD44 molecule<br/> (Indian blood group) (CD44),<br/> transcript variant 5, mRNA.</p> | CD44 molecule (Indian blood group)          | 0.000512<br>308 | -<br>1.224125<br>799 |
| GPC4  | <p>Glypican-4 gene:ENSG00000076716<br/> /// Homo sapiens glypican-4 (GPC4)<br/> mRNA, complete cds. /// Homo<br/> sapiens glypican 4 (GPC4), mRNA.</p>                                                                                                                                                                                                                                                                                                                                                                                                                                                                                                                                                                                                                                                                                                                                                                                                                                                                          | glypican 4                                  | 0.000462<br>664 | 1.248198<br>109      |
| HTR1D | <p>5-hydroxytryptamine receptor 1D<br/> gene:ENSG00000179546 /// 5-<br/> hydroxytryptamine receptor 1D<br/> gene:ENSG00000179546 /// Homo<br/> sapiens 5-hydroxytryptamine<br/> (serotonin) receptor 1D, mRNA (cDNA<br/> clone MGC:12645 IMAGE:4299633),<br/> complete cds. /// Homo sapiens 5-<br/> hydroxytryptamine (serotonin)<br/> receptor 1D (HTR1D), mRNA.</p>                                                                                                                                                                                                                                                                                                                                                                                                                                                                                                                                                                                                                                                          | 5-hydroxytryptamine (serotonin) receptor 1D | 0.002215<br>237 | 1.333056<br>646      |



|        |                                                                                                                                                                                                                                                                                                                                                                                                                                                                                                                                                                                                                                                |                                        |                 |                 |
|--------|------------------------------------------------------------------------------------------------------------------------------------------------------------------------------------------------------------------------------------------------------------------------------------------------------------------------------------------------------------------------------------------------------------------------------------------------------------------------------------------------------------------------------------------------------------------------------------------------------------------------------------------------|----------------------------------------|-----------------|-----------------|
| BTN3A2 | <p>Butyrophilin subfamily 3 member A2<br/> gene:ENSG00000186470 ///</p> <p>Butyrophilin subfamily 3 member A2<br/> gene:ENSG00000186470 ///</p> <p>Butyrophilin subfamily 3 member A2<br/> gene:ENSG00000186470 /// Homo sapiens butyrophilin, subfamily 3, member A2, mRNA (cDNA clone MGC:31880 IMAGE:4870774), complete cds. /// Homo sapiens butyrophilin, subfamily 3, member A2 (BTN3A2), mRNA.</p>                                                                                                                                                                                                                                      | butyrophilin, subfamily 3, member A2   | 0.003331<br>506 | 1.332230<br>205 |
| EDNRA  | <p>21 kDa protein<br/> gene:ENSG00000151617 /// Isoform 2 of Endothelin-1 receptor<br/> gene:ENSG00000151617 /// Isoform 1 of Endothelin-1 receptor<br/> gene:ENSG00000151617 /// Isoform 4 of Endothelin-1 receptor<br/> gene:ENSG00000151617 /// Homo sapiens mRNA for endothelin-1 receptor, complete cds. /// Homo sapiens endothelin receptor type A (EDNRA), mRNA.</p>                                                                                                                                                                                                                                                                   | endothelin receptor type A             | 0.002523<br>627 | 1.370171        |
| SEZ6L  | <p>Seizure related 6 homolog (Mouse)-like<br/> gene:ENSG00000100095 ///</p> <p>Isoform 4 of Seizure 6-like protein<br/> gene:ENSG00000100095 /// Isoform 3 of Seizure 6-like protein<br/> gene:ENSG00000100095 /// Seizure related 6 homolog (Mouse)-like<br/> gene:ENSG00000100095 /// Isoform 5 of Seizure 6-like protein<br/> gene:ENSG00000100095 /// Seizure related 6 homolog (Mouse)-like<br/> gene:ENSG00000100095 /// Seizure related 6 homolog (Mouse)-like<br/> gene:ENSG00000100095 /// Homo sapiens clone DNA96995 SEZ6L (UNQ2542) mRNA, complete cds. /// Homo sapiens seizure related 6 homolog (mouse)-like (SEZ6L), mRNA.</p> | seizure related 6 homolog (mouse)-like | 0.006239<br>4   | 1.333996<br>711 |

|        |                                                                                                                                                                                                                                                                                                                                                                                                                                                                                                                             |                                                                                                         |                 |                      |
|--------|-----------------------------------------------------------------------------------------------------------------------------------------------------------------------------------------------------------------------------------------------------------------------------------------------------------------------------------------------------------------------------------------------------------------------------------------------------------------------------------------------------------------------------|---------------------------------------------------------------------------------------------------------|-----------------|----------------------|
| SLC1A1 | Excitatory amino acid transporter 3<br>gene:ENSG00000106688 /// Solute carrier family 1 (Neuronal/epithelial high affinity glutamate transporter, system Xag), member 1<br>gene:ENSG00000106688 /// Homo sapiens solute carrier family 1 (neuronal/epithelial high affinity glutamate transporter, system Xag), member 1, mRNA (cDNA clone MGC:33786 IMAGE:5261168), complete cds. /// Homo sapiens solute carrier family 1 (neuronal/epithelial high affinity glutamate transporter, system Xag), member 1 (SLC1A1), mRNA. | solute carrier family 1 (neuronal/epithelial high affinity glutamate transporter, system Xag), member 1 | 0.000392<br>958 | 1.343599<br>293      |
| NGFR   | Tumor necrosis factor receptor superfamily member 16<br>gene:ENSG0000064300 /// Homo sapiens nerve growth factor receptor (TNFR superfamily, member 16), mRNA (cDNA clone MGC:48326 IMAGE:5263715), complete cds. /// Homo sapiens nerve growth factor receptor (TNFR superfamily, member 16) (NGFR), mRNA.                                                                                                                                                                                                                 | nerve growth factor receptor (TNFR superfamily, member 16)                                              | 4.39467E<br>-06 | -<br>1.399029<br>99  |
| GPR87  | Probable G-protein coupled receptor 87<br>gene:ENSG00000138271 /// Homo sapiens KPG_002 mRNA, complete cds. /// Homo sapiens G protein-coupled receptor 87 (GPR87), mRNA.                                                                                                                                                                                                                                                                                                                                                   | G protein-coupled receptor 87                                                                           | 9.09167E<br>-05 | -<br>1.493376<br>242 |

|         |                                                                                                                                                                                                                                                                                                                                                                                                                                                                                                                                                                                                                                                                                                                                                                                                                                                                                                     |                                                      |             |              |
|---------|-----------------------------------------------------------------------------------------------------------------------------------------------------------------------------------------------------------------------------------------------------------------------------------------------------------------------------------------------------------------------------------------------------------------------------------------------------------------------------------------------------------------------------------------------------------------------------------------------------------------------------------------------------------------------------------------------------------------------------------------------------------------------------------------------------------------------------------------------------------------------------------------------------|------------------------------------------------------|-------------|--------------|
| PTPRU   | <p>Receptor-type tyrosine-protein phosphatase U<br/> gene:ENSG00000060656 /// protein tyrosine phosphatase, receptor type, U isoform 2 precursor<br/> gene:ENSG00000060656 /// protein tyrosine phosphatase, receptor type, U isoform 3 precursor<br/> gene:ENSG00000060656 /// cDNA FLJ37530 fis, clone BRCAN2012713, highly similar to Receptor-type tyrosine-protein phosphatase U<br/> gene:ENSG00000060656 /// FMI protein gene:ENSG00000060656 /// Homo sapiens protein tyrosine phosphatase, receptor type, U, mRNA (cDNA clone MGC:164848 IMAGE:40147934), complete cds. /// Homo sapiens protein tyrosine phosphatase, receptor type, U (PTPRU), transcript variant 3, mRNA. /// Homo sapiens protein tyrosine phosphatase, receptor type, U (PTPRU), transcript variant 2, mRNA. /// Homo sapiens protein tyrosine phosphatase, receptor type, U (PTPRU), transcript variant 1, mRNA.</p> | protein tyrosine phosphatase, receptor type, U       | 0.004666787 | -1.191944005 |
| TNFRSF9 | <p>Tumor necrosis factor receptor superfamily member 9<br/> gene:ENSG00000049249 /// Human activation dependent T cell mRNA, complete cds. /// Homo sapiens tumor necrosis factor receptor superfamily, member 9 (TNFRSF9), mRNA.</p>                                                                                                                                                                                                                                                                                                                                                                                                                                                                                                                                                                                                                                                               | tumor necrosis factor receptor superfamily, member 9 | 3.28208E-06 | -1.98832707  |
| FZD7    | <p>Frizzled-7 gene:ENSG00000155760 /// Homo sapiens mRNA for frizzled-7, complete cds. /// Homo sapiens frizzled homolog 7 (Drosophila) (FZD7), mRNA.</p>                                                                                                                                                                                                                                                                                                                                                                                                                                                                                                                                                                                                                                                                                                                                           | frizzled homolog 7 (Drosophila)                      | 0.000402709 | 1.210947967  |

|           |                                                                                                                                                                                                                                                                                                                                                                                                                                                                                                                                                                                                                                                                                       |                                                                                           |                 |                      |
|-----------|---------------------------------------------------------------------------------------------------------------------------------------------------------------------------------------------------------------------------------------------------------------------------------------------------------------------------------------------------------------------------------------------------------------------------------------------------------------------------------------------------------------------------------------------------------------------------------------------------------------------------------------------------------------------------------------|-------------------------------------------------------------------------------------------|-----------------|----------------------|
| EDNRB     | Isoform A of Endothelin B receptor gene:ENSG00000136160 /// Isoform C of Endothelin B receptor gene:ENSG00000136160 /// Homo sapiens endothelin ET-B receptor mRNA, complete cds. /// Homo sapiens endothelin receptor type B (EDNRB), transcript variant 2, mRNA. /// Homo sapiens endothelin receptor type B (EDNRB), transcript variant 1, mRNA. /// Homo sapiens endothelin receptor type B (EDNRB), transcript variant 3, mRNA.                                                                                                                                                                                                                                                  | endothelin receptor type B                                                                | 0.007709<br>296 | 1.213146<br>514      |
| TNFRSF10D | Tumor necrosis factor receptor superfamily member 10D gene:ENSG00000173530 /// Homo sapiens clone DNA35663 DcR2-TNFR (UNQ251) mRNA, complete cds. /// Homo sapiens tumor necrosis factor receptor superfamily, member 10d, decoy with truncated death domain (TNFRSF10D), mRNA.                                                                                                                                                                                                                                                                                                                                                                                                       | tumor necrosis factor receptor superfamily, member 10d, decoy with truncated death domain | 9.2738E-06      | -<br>1.372480<br>179 |
| CD36      | Platelet glycoprotein 4 gene:ENSG00000135218 /// Platelet glycoprotein 4 gene:ENSG00000135218 /// Platelet glycoprotein 4 gene:ENSG00000135218 /// Human antigen CD36 (clone 13) mRNA, complete cds. /// Homo sapiens CD36 molecule (thrombospondin receptor) (CD36), transcript variant 1, mRNA. /// Homo sapiens CD36 molecule (thrombospondin receptor) (CD36), transcript variant 2, mRNA. /// Homo sapiens CD36 molecule (thrombospondin receptor) (CD36), transcript variant 3, mRNA. /// Homo sapiens CD36 molecule (thrombospondin receptor) (CD36), transcript variant 4, mRNA. /// Homo sapiens CD36 molecule (thrombospondin receptor) (CD36), transcript variant 5, mRNA. | CD36 molecule (thrombospondin receptor)                                                   | 0.002137<br>002 | -<br>1.364933<br>341 |

|        |                                                                                                                                                                                                                                                                                                                                                                                                                                                                                                                                                                      |                                                                     |             |              |
|--------|----------------------------------------------------------------------------------------------------------------------------------------------------------------------------------------------------------------------------------------------------------------------------------------------------------------------------------------------------------------------------------------------------------------------------------------------------------------------------------------------------------------------------------------------------------------------|---------------------------------------------------------------------|-------------|--------------|
| ANTXR2 | Isoform 4 of Anthrax toxin receptor 2 gene:ENSG00000163297 /// ANTXR2 protein gene:ENSG00000163297 /// Isoform 4 of Anthrax toxin receptor 2 gene:ENSG00000163297 /// Isoform 1 of Anthrax toxin receptor 2 gene:ENSG00000163297 /// Isoform 2 of Anthrax toxin receptor 2 gene:ENSG00000163297 /// Isoform 3 of Anthrax toxin receptor 2 gene:ENSG00000163297 /// Homo sapiens cDNA FLJ31074 fis, clone HSYRA2001476. /// Homo sapiens anthrax toxin receptor 2 (ANTXR2), mRNA.                                                                                     | anthrax toxin receptor 2                                            | 0.000582301 | -1.248326997 |
| OR10P1 | Seven transmembrane helix receptor gene:ENSG00000175398 /// Homo sapiens olfactory receptor, family 10, subfamily P, member 1 (OR10P1), mRNA.                                                                                                                                                                                                                                                                                                                                                                                                                        | olfactory receptor, family 10, subfamily P, member 1                | 0.000510633 | 1.428520049  |
| SLC2A9 | Isoform 1 of Solute carrier family 2, facilitated glucose transporter member 9 gene:ENSG00000109667 /// Isoform 2 of Solute carrier family 2, facilitated glucose transporter member 9 gene:ENSG00000109667 /// Homo sapiens facilitative glucose transporter family member GLUT9 (SLC2A9) mRNA, complete cds. /// Homo sapiens solute carrier family 2 (facilitated glucose transporter), member 9 (SLC2A9), transcript variant 1, mRNA. /// Homo sapiens solute carrier family 2 (facilitated glucose transporter), member 9 (SLC2A9), transcript variant 2, mRNA. | solute carrier family 2 (facilitated glucose transporter), member 9 | 0.004482523 | -1.385852195 |
| IL8RB  | High affinity interleukin-8 receptor B gene:ENSG00000180871 /// Homo sapiens interleukin 8 receptor beta (IL8RB) mRNA, complete cds. /// Homo sapiens interleukin 8 receptor, beta (IL8RB), mRNA.                                                                                                                                                                                                                                                                                                                                                                    | interleukin 8 receptor, beta                                        | 0.001773824 | -1.457311024 |

|         |                                                                                                                                                                                                                                                                                                                                                                                                                                  |                                                   |             |              |
|---------|----------------------------------------------------------------------------------------------------------------------------------------------------------------------------------------------------------------------------------------------------------------------------------------------------------------------------------------------------------------------------------------------------------------------------------|---------------------------------------------------|-------------|--------------|
| HTR2C   | 5-hydroxytryptamine receptor 2C<br>gene:ENSG00000147246 /// 5-hydroxytryptamine receptor 2C<br>gene:ENSG00000147246 /// 5-hydroxytryptamine (Serotonin) receptor 2C<br>gene:ENSG00000147246 /// Human serotonin 5-HT1C receptor mRNA, complete cds. /// Homo sapiens 5-hydroxytryptamine (serotonin) receptor 2C (HTR2C), mRNA.                                                                                                  | 5-hydroxytryptamine (serotonin) receptor 2C       | 7.31336E-06 | -1.562541147 |
| PLSCR3  | cdna:known<br>chromosome:NCBI36:17:7233779:7238567:-1<br>gene:ENSG00000187838 ///<br>cdna:known<br>chromosome:NCBI36:17:7233779:7238572:-1<br>gene:ENSG00000187838 ///<br>cdna:known<br>chromosome:NCBI36:17:7234428:7238153:-1<br>gene:ENSG00000187838 ///<br>Homo sapiens phospholipid scramblase 3, mRNA (cDNA clone MGC:110921 IMAGE:30341717), complete cds. /// Homo sapiens phospholipid scramblase 3 (PLSCR3), mRNA.     | phospholipid scramblase 3                         | 0.2369122   | 1.083089441  |
| ERVWE1  | HERV-W_7q21.2 provirus ancestral Env polyprotein<br>gene:ENSG00000197604 /// HERV-W_7q21.2 provirus ancestral Env polyprotein<br>gene:ENSG00000197604 /// Homo sapiens syncytin precursor, mRNA, complete cds. /// Homo sapiens endogenous retroviral family W, env(C7), member 1 (ERVWE1), transcript variant 2, mRNA. /// Homo sapiens endogenous retroviral family W, env(C7), member 1 (ERVWE1), transcript variant 1, mRNA. | endogenous retroviral family W, env(C7), member 1 | 4.70755E-05 | -1.633324962 |
| SLITRK1 | SLIT and NTRK-like protein 1<br>gene:ENSG00000178235 /// Homo sapiens SLIT and NTRK-like family, member 1, mRNA (cDNA clone MGC:51091 IMAGE:4816570), complete cds. /// Homo sapiens SLIT and NTRK-like family, member 1 (SLITRK1), mRNA.                                                                                                                                                                                        | SLIT and NTRK-like family, member 1               | 0.001538595 | -1.29836266  |

|            |                                                                                                                                                                                                                                                                                                                                                                                                                                                                                                                                                                                                                                                                                                                                                                                                                                                                                                                                                                                                                                                                                                                                                                                                                                                                                                                                                                                                                                                                                                                                                               |                                                 |                    |                          |
|------------|---------------------------------------------------------------------------------------------------------------------------------------------------------------------------------------------------------------------------------------------------------------------------------------------------------------------------------------------------------------------------------------------------------------------------------------------------------------------------------------------------------------------------------------------------------------------------------------------------------------------------------------------------------------------------------------------------------------------------------------------------------------------------------------------------------------------------------------------------------------------------------------------------------------------------------------------------------------------------------------------------------------------------------------------------------------------------------------------------------------------------------------------------------------------------------------------------------------------------------------------------------------------------------------------------------------------------------------------------------------------------------------------------------------------------------------------------------------------------------------------------------------------------------------------------------------|-------------------------------------------------|--------------------|--------------------------|
| <p>FAS</p> | <p>Tumor necrosis factor receptor superfamily, member 6 isoform 1 variant (Fragment)<br/> gene:ENSG00000026103 /// Isoform 6 of Tumor necrosis factor receptor superfamily member 6<br/> gene:ENSG00000026103 /// 38 kDa protein gene:ENSG00000026103 /// Isoform 4 of Tumor necrosis factor receptor superfamily member 6<br/> gene:ENSG00000026103 /// Isoform 4 of Tumor necrosis factor receptor superfamily member 6<br/> gene:ENSG00000026103 /// Isoform 2 of Tumor necrosis factor receptor superfamily member 6<br/> gene:ENSG00000026103 /// Isoform 5 of Tumor necrosis factor receptor superfamily member 6<br/> gene:ENSG00000026103 /// Truncated tumor necrosis factor receptor superfamily member 6<br/> gene:ENSG00000026103 /// Isoform 1 of Tumor necrosis factor receptor superfamily member 6<br/> gene:ENSG00000026103 /// Isoform 3 of Tumor necrosis factor receptor superfamily member 6<br/> gene:ENSG00000026103 /// Homo sapiens Fas (TNF receptor superfamily, member 6), mRNA (cDNA clone MGC:21432 IMAGE:4514272), complete cds. /// Homo sapiens Fas (TNF receptor superfamily, member 6) (FAS), transcript variant 1, mRNA. /// Homo sapiens Fas (TNF receptor superfamily, member 6) (FAS), transcript variant 2, mRNA. /// Homo sapiens Fas (TNF receptor superfamily, member 6) (FAS), transcript variant 3, mRNA. /// Homo sapiens Fas (TNF receptor superfamily, member 6) (FAS), transcript variant 4, mRNA. /// Homo sapiens Fas (TNF receptor superfamily, member 6) (FAS), transcript variant 8, mRNA. /// Homo</p> | <p>Fas (TNF receptor superfamily, member 6)</p> | <p>8.13415E-06</p> | <p>-<br/>1.318693504</p> |
|------------|---------------------------------------------------------------------------------------------------------------------------------------------------------------------------------------------------------------------------------------------------------------------------------------------------------------------------------------------------------------------------------------------------------------------------------------------------------------------------------------------------------------------------------------------------------------------------------------------------------------------------------------------------------------------------------------------------------------------------------------------------------------------------------------------------------------------------------------------------------------------------------------------------------------------------------------------------------------------------------------------------------------------------------------------------------------------------------------------------------------------------------------------------------------------------------------------------------------------------------------------------------------------------------------------------------------------------------------------------------------------------------------------------------------------------------------------------------------------------------------------------------------------------------------------------------------|-------------------------------------------------|--------------------|--------------------------|

|        |                                                                                                                                                                                                                                                                               |                                              |                 |                      |
|--------|-------------------------------------------------------------------------------------------------------------------------------------------------------------------------------------------------------------------------------------------------------------------------------|----------------------------------------------|-----------------|----------------------|
|        | sapiens Fas (TNF receptor superfamily, member 6) (FAS), transcript variant 5, mRNA. /// Homo sapiens Fas (TNF receptor superfamily, member 6) (FAS), transcript variant 6, mRNA. /// Homo sapiens Fas (TNF receptor superfamily, member 6) (FAS), transcript variant 7, mRNA. |                                              |                 |                      |
| GABBR2 | Gamma-aminobutyric acid type B receptor subunit 2<br>gene:ENSG00000136928 /// Homo sapiens GABA-B receptor mRNA, complete cds. /// Homo sapiens gamma-aminobutyric acid (GABA) B receptor, 2 (GABBR2), mRNA.                                                                  | gamma-aminobutyric acid (GABA) B receptor, 2 | 0.000211<br>238 | -<br>1.423400<br>991 |
| CD83   | CD83 antigen<br>gene:ENSG00000112149 /// Homo sapiens CD83 molecule, mRNA (cDNA clone MGC:26322 IMAGE:4818856), complete cds. /// Homo sapiens CD83 molecule (CD83), transcript variant 1, mRNA. /// Homo sapiens CD83 molecule (CD83), transcript variant 2, mRNA.           | CD83 molecule                                | 0.009333<br>693 | -<br>1.200761<br>833 |



|           |                                                                                                                                                                                                                                                                                                                                                                            |                                                                            |             |                  |
|-----------|----------------------------------------------------------------------------------------------------------------------------------------------------------------------------------------------------------------------------------------------------------------------------------------------------------------------------------------------------------------------------|----------------------------------------------------------------------------|-------------|------------------|
| KDR       | Vascular endothelial growth factor receptor 2 gene:ENSG00000128052 /// Homo sapiens KDR/flk-1 protein mRNA, complete cds. /// Homo sapiens kinase insert domain receptor (a type III receptor tyrosine kinase) (KDR), mRNA.                                                                                                                                                | kinase insert domain receptor (a type III receptor tyrosine kinase)        | 0.002021804 | -<br>1.176761484 |
| TNFRSF10A | Tumor necrosis factor receptor superfamily member 10A gene:ENSG00000104689 /// Homo sapiens tumor necrosis factor receptor superfamily, member 10a, mRNA (cDNA clone MGC:9365 IMAGE:3857315), complete cds. /// Homo sapiens tumor necrosis factor receptor superfamily, member 10a (TNFRSF10A), mRNA.                                                                     | tumor necrosis factor receptor superfamily, member 10a                     | 0.000301718 | -<br>1.327680885 |
| GP1BB     | Human glycoprotein Ib beta mRNA, complete cds.                                                                                                                                                                                                                                                                                                                             | glycoprotein Ib (platelet), beta polypeptide                               | 0.390110093 | -<br>1.073658187 |
| TMPRSS11E | Transmembrane protease, serine 11E gene:ENSG00000087128 /// Transmembrane protease, serine 11E2 gene:ENSG00000173487 /// Homo sapiens cDNA FLJ75331 complete cds, highly similar to Homo sapiens serine protease mRNA. /// Homo sapiens clone DNA68871 serine protease (UNQ742) mRNA, complete cds. /// Homo sapiens transmembrane protease, serine 11E (TMPRSS11E), mRNA. | transmembrane protease, serine 11E2 /// transmembrane protease, serine 11E | 2.20E-06    | -<br>1.554814264 |
| DSC3      | Isoform 3A of Desmocollin-3 gene:ENSG00000134762 /// Isoform 3B of Desmocollin-3 gene:ENSG00000134762 /// Homo sapiens mRNA for desmocollin type 4, complete cds. /// Homo sapiens desmocollin 3 (DSC3), transcript variant Dsc3a, mRNA. /// Homo sapiens desmocollin 3 (DSC3), transcript variant Dsc3b, mRNA.                                                            | desmocollin 3                                                              | 5.21652E-09 | -<br>1.8865042   |

|        |                                                                                                                                                                                                                                                                                                                                                                                                                                                                             |                                          |                 |                      |
|--------|-----------------------------------------------------------------------------------------------------------------------------------------------------------------------------------------------------------------------------------------------------------------------------------------------------------------------------------------------------------------------------------------------------------------------------------------------------------------------------|------------------------------------------|-----------------|----------------------|
| GPR50  | G protein-coupled receptor 50<br>gene:ENSG00000102195 /// Human melatonin-related receptor mRNA, complete cds. /// Homo sapiens G protein-coupled receptor 50 (GPR50), mRNA.                                                                                                                                                                                                                                                                                                | G protein-coupled receptor 50            | 0.000133<br>863 | -<br>1.454577<br>025 |
| GRPR   | Gastrin-releasing peptide receptor<br>gene:ENSG00000126010 /// Human gastrin releasing peptide receptor (GRPR) mRNA, complete cds. /// Homo sapiens gastrin-releasing peptide receptor (GRPR), mRNA.                                                                                                                                                                                                                                                                        | gastrin-releasing peptide receptor       | 1.80275E<br>-05 | 1.367066<br>636      |
| PTGER4 | Prostaglandin E2 receptor EP4<br>subtype gene:ENSG00000171522 /// Homo sapiens prostaglandin E2 receptor EP2 subtype mRNA, complete cds. /// Homo sapiens prostaglandin E receptor 4 (subtype EP4) (PTGER4), mRNA.                                                                                                                                                                                                                                                          | prostaglandin E receptor 4 (subtype EP4) | 0.000576<br>642 | -<br>1.373257<br>41  |
| CXCR4  | cdna:known<br>chromosome:NCBI36:2:136588389:13<br>6590283:-1 gene:ENSG00000121966<br>/// Isoform 2 of C-X-C chemokine<br>receptor type 4<br>gene:ENSG00000121966 /// Homo<br>sapiens chemokine receptor CXCR4-<br>Lo (CXCR4) mRNA, alternatively<br>spliced, complete cds. /// Homo<br>sapiens chemokine (C-X-C motif)<br>receptor 4 (CXCR4), transcript variant<br>1, mRNA. /// Homo sapiens<br>chemokine (C-X-C motif) receptor 4<br>(CXCR4), transcript variant 2, mRNA. | chemokine (C-X-C motif) receptor 4       | 0.000686<br>099 | 1.285260<br>181      |
| GPR25  | Probable G-protein coupled receptor<br>25 gene:ENSG00000170128 /// Homo<br>sapiens G protein-coupled receptor<br>25, mRNA (cDNA clone MGC:161664<br>IMAGE:8992102), complete cds. ///<br>Homo sapiens G protein-coupled<br>receptor 25 (GPR25), mRNA.                                                                                                                                                                                                                       | G protein-coupled receptor 25            | 0.000683<br>671 | -<br>1.402211<br>558 |

|         |                                                                                                                                                                                                                                                                                                                                                                                                                                                                                                                                                                                                                                                                                                                                                                                                                                                                                                                                                                                                                                        |                                                                                  |                 |                      |
|---------|----------------------------------------------------------------------------------------------------------------------------------------------------------------------------------------------------------------------------------------------------------------------------------------------------------------------------------------------------------------------------------------------------------------------------------------------------------------------------------------------------------------------------------------------------------------------------------------------------------------------------------------------------------------------------------------------------------------------------------------------------------------------------------------------------------------------------------------------------------------------------------------------------------------------------------------------------------------------------------------------------------------------------------------|----------------------------------------------------------------------------------|-----------------|----------------------|
| CA14    | Carbonic anhydrase 14<br>gene:ENSG00000118298 /// Homo sapiens cDNA FLJ90284 fis, clone NT2RP1000613, weakly similar to CARBONIC ANHYDRASE VI (EC 4.2.1.1). /// Homo sapiens carbonic anhydrase XIV (CA14), mRNA.                                                                                                                                                                                                                                                                                                                                                                                                                                                                                                                                                                                                                                                                                                                                                                                                                      | carbonic anhydrase XIV                                                           | 0.000351<br>389 | 1.233556<br>271      |
| GLIPR1  | Glioma pathogenesis-related protein 1 gene:ENSG00000139278 /// Homo sapiens GLI pathogenesis-related 1, mRNA (cDNA clone MGC:21203 IMAGE:4453841), complete cds. /// Homo sapiens GLI pathogenesis-related 1 (GLIPR1), mRNA.                                                                                                                                                                                                                                                                                                                                                                                                                                                                                                                                                                                                                                                                                                                                                                                                           | GLI pathogenesis-related 1                                                       | 0.001216<br>405 | -<br>1.219278<br>501 |
| CEACAM1 | Putative uncharacterized protein CEACAM1 gene:ENSG00000079385 /// Isoform D of Carcinoembryonic antigen-related cell adhesion molecule 1 gene:ENSG00000079385 /// Isoform C of Carcinoembryonic antigen-related cell adhesion molecule 1 gene:ENSG00000079385 /// Isoform B of Carcinoembryonic antigen-related cell adhesion molecule 1 gene:ENSG00000079385 /// Isoform A of Carcinoembryonic antigen-related cell adhesion molecule 1 gene:ENSG00000079385 /// Biliary glycoprotein gene:ENSG00000079385 /// carcinoembryonic antigen-related cell adhesion molecule 1 isoform 2 precursor gene:ENSG00000079385 /// Putative carcinoembryonic antigen-related cell adhesion molecule 1 short form 3 gene:ENSG00000079385 /// BGP protein gene:ENSG00000079385 /// Carcinoembryonic antigen-related cell adhesion molecule 1 (Biliary glycoprotein), isoform CRA_g gene:ENSG00000079385 /// Putative uncharacterized protein CEACAM1 gene:ENSG00000079385 /// Isoform I of Carcinoembryonic antigen-related cell adhesion molecule 1 | carcinoembryonic antigen-related cell adhesion molecule 1 (biliary glycoprotein) | 1.21086E<br>-05 | -<br>1.484050<br>255 |

|      |                                                                                                                                                                                                                                                                                                                                                                                                                                                                                                                                                                                |               |                 |                 |
|------|--------------------------------------------------------------------------------------------------------------------------------------------------------------------------------------------------------------------------------------------------------------------------------------------------------------------------------------------------------------------------------------------------------------------------------------------------------------------------------------------------------------------------------------------------------------------------------|---------------|-----------------|-----------------|
|      | <p>gene:ENSG00000079385 /// Isoform H of Carcinoembryonic antigen-related cell adhesion molecule 1</p> <p>gene:ENSG00000079385 /// Human biliary glycoprotein I (BGP I) mRNA, complete cds. /// Homo sapiens carcinoembryonic antigen-related cell adhesion molecule 1 (biliary glycoprotein) (CEACAM1), transcript variant 1, mRNA. /// Homo sapiens carcinoembryonic antigen-related cell adhesion molecule 1 (biliary glycoprotein) (CEACAM1), transcript variant 2, mRNA.</p>                                                                                              |               |                 |                 |
| CD99 | <p>Isoform I of CD99 antigen</p> <p>gene:ENSG00000002586 /// Putative uncharacterized protein CD99</p> <p>gene:ENSG00000002586 /// CD99 antigen isoform b precursor</p> <p>gene:ENSG00000002586 /// Putative uncharacterized protein CD99</p> <p>gene:ENSG00000002586 /// Putative uncharacterized protein CD99</p> <p>gene:ENSG00000002586 /// Homo sapiens CD99 molecule, mRNA (cDNA clone MGC:19734 IMAGE:3606974), complete cds. /// Homo sapiens CD99 molecule (CD99), transcript variant 1, mRNA. /// Homo sapiens CD99 molecule (CD99), transcript variant 2, mRNA.</p> | CD99 molecule | 0.004074<br>288 | 1.190899<br>882 |

|               |                                                                                                                                                                                                                                                                                                                                                                                                                                                                                                                                         |                                                            |             |                  |
|---------------|-----------------------------------------------------------------------------------------------------------------------------------------------------------------------------------------------------------------------------------------------------------------------------------------------------------------------------------------------------------------------------------------------------------------------------------------------------------------------------------------------------------------------------------------|------------------------------------------------------------|-------------|------------------|
| NETO2         | Isoform 1 of Neuropilin and tolloid-like protein 2<br>gene:ENSG00000171208 /// Homo sapiens clone DNA84912 Neto2 (UNQ1926) mRNA, complete cds. /// Homo sapiens neuropilin (NRP) and tolloid (TLL)-like 2 (NETO2), mRNA.                                                                                                                                                                                                                                                                                                                | neuropilin (NRP) and tolloid (TLL)-like 2                  | 1.91967E-06 | -<br>1.335000414 |
| LANCL1        | LanC-like protein 1<br>gene:ENSG00000115365 /// Homo sapiens LanC lantibiotic synthetase component C-like 1 (bacterial), mRNA (cDNA clone MGC:26280 IMAGE:4829574), complete cds. /// Homo sapiens LanC lantibiotic synthetase component C-like 1 (bacterial) (LANCL1), transcript variant 3, mRNA. /// Homo sapiens LanC lantibiotic synthetase component C-like 1 (bacterial) (LANCL1), transcript variant 1, mRNA. /// Homo sapiens LanC lantibiotic synthetase component C-like 1 (bacterial) (LANCL1), transcript variant 2, mRNA. | LanC lantibiotic synthetase component C-like 1 (bacterial) | 0.005249954 | 1.171764212      |
| DKFZP564O0823 | Protein PARM-1<br>gene:ENSG00000169116 /// Homo sapiens clone DNA92223 VYKT1879 (UNQ1879) mRNA, complete cds. /// Homo sapiens DKFZP564O0823 protein (DKFZP564O0823), mRNA.                                                                                                                                                                                                                                                                                                                                                             | DKFZP564O0823 protein                                      | 5.61324E-05 | -<br>1.348721612 |
| CD9           | CD9 antigen gene:ENSG00000010278 /// CD9 antigen<br>gene:ENSG00000010278 /// Bladder cancer related CD9 variant<br>gene:ENSG00000010278 /// Putative uncharacterized protein CD9<br>gene:ENSG00000010278 /// Homo sapiens bladder cancer related CD9 variant (BTCC-1) mRNA, complete cds. /// Homo sapiens CD9 molecule (CD9), mRNA.                                                                                                                                                                                                    | CD9 molecule                                               | 0.005874662 | 1.178748245      |

|       |                                                                                                                                                                                                                                                                                                                                                                                                                                                                                                                 |                                 |                 |                 |
|-------|-----------------------------------------------------------------------------------------------------------------------------------------------------------------------------------------------------------------------------------------------------------------------------------------------------------------------------------------------------------------------------------------------------------------------------------------------------------------------------------------------------------------|---------------------------------|-----------------|-----------------|
| LRRN1 | Leucine-rich repeat neuronal protein 1 gene:ENSG00000175928 /// Homo sapiens leucine rich repeat neuronal 1, mRNA (cDNA clone MGC:26098 IMAGE:4826337), complete cds. /// Homo sapiens leucine rich repeat neuronal 1 (LRRN1), mRNA.                                                                                                                                                                                                                                                                            | leucine rich repeat neuronal 1  | 0.002870<br>616 | 1.177947<br>33  |
| MPZL1 | Isoform 3 of Myelin protein zero-like protein 1 gene:ENSG00000197965 /// Isoform 1 of Myelin protein zero-like protein 1 gene:ENSG00000197965 /// Myelin protein zero-like 1 gene:ENSG00000197965 /// Isoform 3 of Myelin protein zero-like protein 1 gene:ENSG00000197965 /// Homo sapiens clone DNA76510 MPZL1 (UNQ849) mRNA, complete cds. /// Homo sapiens myelin protein zero-like 1 (MPZL1), transcript variant 1, mRNA. /// Homo sapiens myelin protein zero-like 1 (MPZL1), transcript variant 2, mRNA. | myelin protein zero-like 1      | 0.003136<br>446 | 1.168400<br>169 |
| FZD5  | Frizzled-5 gene:ENSG00000163251 /// Homo sapiens FZD5 mRNA for seven-transmembrane receptor Frizzled-5, complete cds. /// Homo sapiens frizzled homolog 5 (Drosophila) (FZD5), mRNA.                                                                                                                                                                                                                                                                                                                            | frizzled homolog 5 (Drosophila) | 0.000188<br>846 | 1.237215<br>483 |

|        |                                                                                                                                                                                                                                                                                                                                                                                                                                                                                                                                                                                                                                                                                                                                                                                                                                                                                                                                                                                                                                                                                                                                                                                                                                                                                                                                                                                                                                                                                                                                                                                                                   |                                                                                             |                 |                 |
|--------|-------------------------------------------------------------------------------------------------------------------------------------------------------------------------------------------------------------------------------------------------------------------------------------------------------------------------------------------------------------------------------------------------------------------------------------------------------------------------------------------------------------------------------------------------------------------------------------------------------------------------------------------------------------------------------------------------------------------------------------------------------------------------------------------------------------------------------------------------------------------------------------------------------------------------------------------------------------------------------------------------------------------------------------------------------------------------------------------------------------------------------------------------------------------------------------------------------------------------------------------------------------------------------------------------------------------------------------------------------------------------------------------------------------------------------------------------------------------------------------------------------------------------------------------------------------------------------------------------------------------|---------------------------------------------------------------------------------------------|-----------------|-----------------|
| SEMA6D | <p>Isoform 7 of Semaphorin-6D<br/> gene:ENSG00000137872 ///<br/> semaphorin 6D isoform 5 precursor<br/> gene:ENSG00000137872 /// Isoform<br/> 4 of Semaphorin-6D<br/> gene:ENSG00000137872 /// Isoform<br/> 1 of Semaphorin-6D<br/> gene:ENSG00000137872 /// Isoform<br/> 5 of Semaphorin-6D<br/> gene:ENSG00000137872 /// Isoform<br/> 6 of Semaphorin-6D<br/> gene:ENSG00000137872 /// Isoform<br/> 3 of Semaphorin-6D<br/> gene:ENSG00000137872 /// Isoform<br/> 2 of Semaphorin-6D<br/> gene:ENSG00000137872 /// Homo<br/> sapiens semaphorin 6D isoform 4<br/> (SEMA6D) mRNA, complete cds;<br/> alternatively spliced. /// Homo<br/> sapiens sema domain,<br/> transmembrane domain (TM), and<br/> cytoplasmic domain, (semaphorin) 6D<br/> (SEMA6D), transcript variant 6,<br/> mRNA. /// Homo sapiens sema<br/> domain, transmembrane domain<br/> (TM), and cytoplasmic domain,<br/> (semaphorin) 6D (SEMA6D),<br/> transcript variant 2, mRNA. /// Homo<br/> sapiens sema domain,<br/> transmembrane domain (TM), and<br/> cytoplasmic domain, (semaphorin) 6D<br/> (SEMA6D), transcript variant 3,<br/> mRNA. /// Homo sapiens sema<br/> domain, transmembrane domain<br/> (TM), and cytoplasmic domain,<br/> (semaphorin) 6D (SEMA6D),<br/> transcript variant 1, mRNA. /// Homo<br/> sapiens sema domain,<br/> transmembrane domain (TM), and<br/> cytoplasmic domain, (semaphorin) 6D<br/> (SEMA6D), transcript variant 4,<br/> mRNA. /// Homo sapiens sema<br/> domain, transmembrane domain<br/> (TM), and cytoplasmic domain,<br/> (semaphorin) 6D (SEMA6D),<br/> transcript variant 5, mRNA.</p> | sema domain,<br>transmembrane<br>domain (TM), and<br>cytoplasmic domain,<br>(semaphorin) 6D | 0.000561<br>386 | 1.445633<br>375 |
|--------|-------------------------------------------------------------------------------------------------------------------------------------------------------------------------------------------------------------------------------------------------------------------------------------------------------------------------------------------------------------------------------------------------------------------------------------------------------------------------------------------------------------------------------------------------------------------------------------------------------------------------------------------------------------------------------------------------------------------------------------------------------------------------------------------------------------------------------------------------------------------------------------------------------------------------------------------------------------------------------------------------------------------------------------------------------------------------------------------------------------------------------------------------------------------------------------------------------------------------------------------------------------------------------------------------------------------------------------------------------------------------------------------------------------------------------------------------------------------------------------------------------------------------------------------------------------------------------------------------------------------|---------------------------------------------------------------------------------------------|-----------------|-----------------|

|       |                                                                                                                                                                                                                                                                                                                                                                                 |                                                             |                 |                      |
|-------|---------------------------------------------------------------------------------------------------------------------------------------------------------------------------------------------------------------------------------------------------------------------------------------------------------------------------------------------------------------------------------|-------------------------------------------------------------|-----------------|----------------------|
| GRM4  | Metabotropic glutamate receptor 4<br>gene:ENSG00000124493 /// cDNA FLJ16766 fis, clone BRAWH3013197, highly similar to Metabotropic glutamate receptor 4<br>gene:ENSG00000124493 /// Homo sapiens cDNA FLJ78562 complete cds, highly similar to Homo sapiens glutamate receptor, metabotropic 4 (GRM4), mRNA. /// Homo sapiens glutamate receptor, metabotropic 4 (GRM4), mRNA. | glutamate receptor, metabotropic 4                          | 0.002429<br>438 | -<br>1.219287<br>61  |
| DSG3  | Desmoglein-3<br>gene:ENSG00000134757 /// Human 130-kD pemphigus vulgaris antigen mRNA, complete cds. /// Homo sapiens desmoglein 3 (pemphigus vulgaris antigen) (DSG3), mRNA.                                                                                                                                                                                                   | desmoglein 3 (pemphigus vulgaris antigen)                   | 0.000556<br>576 | -<br>1.547738<br>515 |
| CDH8  | Cadherin-8 gene:ENSG00000150394 /// Putative uncharacterized protein CDH8 gene:ENSG00000150394 /// Homo sapiens cDNA FLJ42744 fis, clone BRAWH3000088, highly similar to CADHERIN-8 PRECURSOR. /// Homo sapiens cadherin 8, type 2 (CDH8), mRNA.                                                                                                                                | cadherin 8, type 2                                          | 1.36429E<br>-05 | -<br>1.344971<br>305 |
| PRRG4 | Transmembrane gamma-carboxyglutamic acid protein 4<br>gene:ENSG00000135378 /// Homo sapiens proline rich Gla (G-carboxyglutamic acid) 4 (transmembrane), mRNA (cDNA clone MGC:74683 IMAGE:5183337), complete cds. /// Homo sapiens proline rich Gla (G-carboxyglutamic acid) 4 (transmembrane) (PRRG4), mRNA.                                                                   | proline rich Gla (G-carboxyglutamic acid) 4 (transmembrane) | 0.007345<br>094 | -<br>1.283143<br>148 |
| TYRO3 | Tyrosine-protein kinase receptor TYRO3 gene:ENSG00000092445 /// Homo sapiens mRNA for Sky, complete cds. /// Homo sapiens TYRO3 protein tyrosine kinase (TYRO3), mRNA.                                                                                                                                                                                                          | TYRO3 protein tyrosine kinase                               | 0.000354<br>804 | 1.231611<br>604      |



|       |                                                                                                                                                                                                                                                                                                                                                                                                                                                                                                                                                                                                                                                                                    |                                                              |                 |                      |
|-------|------------------------------------------------------------------------------------------------------------------------------------------------------------------------------------------------------------------------------------------------------------------------------------------------------------------------------------------------------------------------------------------------------------------------------------------------------------------------------------------------------------------------------------------------------------------------------------------------------------------------------------------------------------------------------------|--------------------------------------------------------------|-----------------|----------------------|
| RPRM  | Protein reprimo<br>gene:ENSG00000177519 /// Homo sapiens reprimo, TP53 dependent G2 arrest mediator candidate, mRNA (cDNA clone MGC:11260 IMAGE:3942270), complete cds. /// Homo sapiens reprimo, TP53 dependent G2 arrest mediator candidate (RPRM), mRNA.                                                                                                                                                                                                                                                                                                                                                                                                                        | reprimo, TP53 dependent G2 arrest mediator candidate         | 0.005161<br>311 | 1.194146<br>899      |
| PVRL1 | Isoform Alpha of Poliovirus receptor-related protein 1<br>gene:ENSG00000110400 /// Isoform Delta of Poliovirus receptor-related protein 1 gene:ENSG00000110400 /// Isoform Gamma of Poliovirus receptor-related protein 1<br>gene:ENSG00000110400 /// Homo sapiens herpesvirus entry protein C (HVEC) mRNA, complete cds. /// Homo sapiens poliovirus receptor-related 1 (herpesvirus entry mediator C) (PVRL1), transcript variant 1, mRNA. /// Homo sapiens poliovirus receptor-related 1 (herpesvirus entry mediator C) (PVRL1), transcript variant 2, mRNA. /// Homo sapiens poliovirus receptor-related 1 (herpesvirus entry mediator C) (PVRL1), transcript variant 3, mRNA. | poliovirus receptor-related 1 (herpesvirus entry mediator C) | 0.004707<br>814 | -<br>1.182618<br>931 |
| LPHN3 | Isoform 3 of Latrophilin-3<br>gene:ENSG00000150471 /// Isoform 1 of Latrophilin-3<br>gene:ENSG00000150471 /// latrophilin 3 precursor<br>gene:ENSG00000150471 /// Homo sapiens latrophilin 3 (LPHN3), mRNA.                                                                                                                                                                                                                                                                                                                                                                                                                                                                        | latrophilin 3                                                | 0.005154<br>898 | -<br>1.217792<br>516 |
| HAS1  | Hyaluronan synthase 1<br>gene:ENSG00000105509 /// Hyaluronan synthase 1 variant Va<br>gene:ENSG00000105509 /// Hyaluronan synthase 1 variant Vb<br>gene:ENSG00000105509 /// Homo sapiens hyaluronan synthase 1, mRNA (cDNA clone MGC:46218 IMAGE:5589083), complete cds. /// Homo sapiens hyaluronan synthase 1 (HAS1), mRNA.                                                                                                                                                                                                                                                                                                                                                      | hyaluronan synthase 1                                        | 0.003500<br>202 | -<br>1.247958<br>981 |

|       |                                                                                                                                                                                                                                                                                                                                                                                                                                                                                                                                                              |                                                |                 |                      |
|-------|--------------------------------------------------------------------------------------------------------------------------------------------------------------------------------------------------------------------------------------------------------------------------------------------------------------------------------------------------------------------------------------------------------------------------------------------------------------------------------------------------------------------------------------------------------------|------------------------------------------------|-----------------|----------------------|
| HAS2  | Hyaluronan synthase 2<br>gene:ENSG00000170961 /// Human Has2 mRNA, complete cds. /// Homo sapiens hyaluronan synthase 2 (HAS2), mRNA.                                                                                                                                                                                                                                                                                                                                                                                                                        | hyaluronan synthase 2                          | 0.000787<br>201 | -<br>1.275012<br>183 |
| PTPRM | Receptor-type tyrosine-protein phosphatase mu<br>gene:ENSG00000173482 /// PTPRM protein gene:ENSG00000173482 /// cDNA FLJ55898, highly similar to Receptor-type tyrosine-protein phosphatase mu<br>gene:ENSG00000173482 /// Homo sapiens protein tyrosine phosphatase, receptor type, M, mRNA (cDNA clone MGC:166994 IMAGE:8860327), complete cds. /// Homo sapiens protein tyrosine phosphatase, receptor type, M (PTPRM), transcript variant 2, mRNA. /// Homo sapiens protein tyrosine phosphatase, receptor type, M (PTPRM), transcript variant 1, mRNA. | protein tyrosine phosphatase, receptor type, M | 0.001477<br>125 | -<br>1.226370<br>184 |
| PTPRE | Receptor-type tyrosine-protein phosphatase epsilon precursor<br>gene:ENSG00000132334 /// Isoform 2 of Receptor-type tyrosine-protein phosphatase epsilon<br>gene:ENSG00000132334 /// Homo sapiens protein tyrosine phosphatase, receptor type, E, mRNA (cDNA clone MGC:48280 IMAGE:5274802), complete cds. /// Homo sapiens protein tyrosine phosphatase, receptor type, E (PTPRE), transcript variant 2, mRNA. /// Homo sapiens protein tyrosine phosphatase, receptor type, E (PTPRE), transcript variant 1, mRNA.                                         | protein tyrosine phosphatase, receptor type, E | 3.81593E<br>-06 | -<br>1.667249<br>907 |

|       |                                                                                                                                                                                                                                                                                                                                                                                                                                                                                                                                                             |                                                             |             |              |
|-------|-------------------------------------------------------------------------------------------------------------------------------------------------------------------------------------------------------------------------------------------------------------------------------------------------------------------------------------------------------------------------------------------------------------------------------------------------------------------------------------------------------------------------------------------------------------|-------------------------------------------------------------|-------------|--------------|
| MDGA2 | MAM domain-containing glycosylphosphatidylinositol anchor protein 2 gene:ENSG00000139915 /// MAM domain containing 1 isoform 2 gene:ENSG00000139915 /// MAM domain containing 1 isoform 2 gene:ENSG00000139915 /// Homo sapiens MAM domain-containing glycosylphosphatidylinositol anchor 2 (MDGA2) mRNA, complete cds. /// Homo sapiens MAM domain containing glycosylphosphatidylinositol anchor 2 (MDGA2), transcript variant 2, mRNA. /// Homo sapiens MAM domain containing glycosylphosphatidylinositol anchor 2 (MDGA2), transcript variant 1, mRNA. | MAM domain containing glycosylphosphatidylinositol anchor 2 | 0.002967012 | -1.356547479 |
| PVRL3 | Isoform 1 of Poliovirus receptor-related protein 3 gene:ENSG00000177707 /// cDNA FLJ90624 fis, clone PLACE1002911, weakly similar to POLIOVIRUS RECEPTOR HOMOLOG gene:ENSG00000177707 /// Homo sapiens cDNA FLJ90624 fis, clone PLACE1002911, weakly similar to POLIOVIRUS RECEPTOR HOMOLOG PRECURSOR. /// Homo sapiens poliovirus receptor-related 3 (PVRL3), mRNA.                                                                                                                                                                                        | poliovirus receptor-related 3                               | 0.008995663 | 1.155047855  |

|         |                                                                                                                                                                                                                                                                                                                                                                                                                                                                                                                                                                                                                                               |                                                             |             |              |
|---------|-----------------------------------------------------------------------------------------------------------------------------------------------------------------------------------------------------------------------------------------------------------------------------------------------------------------------------------------------------------------------------------------------------------------------------------------------------------------------------------------------------------------------------------------------------------------------------------------------------------------------------------------------|-------------------------------------------------------------|-------------|--------------|
| SLC44A5 | <p>Isoform 2 of Choline transporter-like protein 5 gene:ENSG00000137968 ///</p> <p>Isoform 2 of Choline transporter-like protein 5 gene:ENSG00000137968 ///</p> <p>Isoform 1 of Choline transporter-like protein 5 gene:ENSG00000137968 ///</p> <p>Putative uncharacterized protein SLC44A5 gene:ENSG00000137968 ///</p> <p>Homo sapiens solute carrier family 44, member 5, mRNA (cDNA clone MGC:42574 IMAGE:4824861), complete cds. ///</p> <p>Homo sapiens solute carrier family 44, member 5 (SLC44A5), transcript variant 1, mRNA. ///</p> <p>Homo sapiens solute carrier family 44, member 5 (SLC44A5), transcript variant 2, mRNA.</p> | solute carrier family 44, member 5                          | 0.001243544 | -1.364925707 |
| TMEM9   | <p>Transmembrane protein 9 gene:ENSG00000116857 ///</p> <p>Transmembrane protein 9 gene:ENSG00000116857 /// 16 kDa protein gene:ENSG00000116857 ///</p> <p>Homo sapiens cDNA FLJ34407 fis, clone HEART1000173. ///</p> <p>Homo sapiens transmembrane protein 9 (TMEM9), mRNA.</p>             | transmembrane protein 9                                     | 0.001251575 | 1.213576556  |
| LGR5    | <p>Leucine-rich repeat-containing G-protein coupled receptor 5 gene:ENSG00000139292 ///</p> <p>Homo sapiens orphan G protein-coupled receptor HG38 mRNA, complete cds. ///</p> <p>Homo sapiens leucine-rich repeat-containing G protein-coupled receptor 5 (LGR5), mRNA.</p>                                                                                                                                                                                                                                                                                                                                                                  | leucine-rich repeat-containing G protein-coupled receptor 5 | 4.09021E-05 | 1.573148422  |

|        |                                                                                                                                                                                                                                                                                                                                                                                                                                                                                                                                                                                                                                                                                    |                                                      |                 |                      |
|--------|------------------------------------------------------------------------------------------------------------------------------------------------------------------------------------------------------------------------------------------------------------------------------------------------------------------------------------------------------------------------------------------------------------------------------------------------------------------------------------------------------------------------------------------------------------------------------------------------------------------------------------------------------------------------------------|------------------------------------------------------|-----------------|----------------------|
| EMP3   | Epithelial membrane protein 3<br>gene:ENSG00000142227 /// Homo sapiens epithelial membrane protein 3, mRNA (cDNA clone MGC:9511 IMAGE:3891050), complete cds. /// Homo sapiens epithelial membrane protein 3 (EMP3), mRNA.                                                                                                                                                                                                                                                                                                                                                                                                                                                         | epithelial membrane protein 3                        | 0.006650<br>587 | 1.189978<br>91       |
| SEZ6L2 | Isoform 3 of Seizure 6-like protein 2<br>gene:ENSG00000174938 /// Isoform 1 of Seizure 6-like protein 2<br>gene:ENSG00000174938 /// seizure related 6 homolog (mouse)-like 2 isoform 4<br>gene:ENSG00000174938 /// Homo sapiens clone DNA84909 PSK-1 (UNQ1903) mRNA, complete cds. /// Homo sapiens seizure related 6 homolog (mouse)-like 2 (SEZ6L2), transcript variant 2, mRNA. /// Homo sapiens seizure related 6 homolog (mouse)-like 2 (SEZ6L2), transcript variant 4, mRNA. /// Homo sapiens seizure related 6 homolog (mouse)-like 2 (SEZ6L2), transcript variant 3, mRNA. /// Homo sapiens seizure related 6 homolog (mouse)-like 2 (SEZ6L2), transcript variant 1, mRNA. | seizure related 6 homolog (mouse)-like 2             | 0.005945<br>588 | 1.180542<br>277      |
| ASAM   | Adipocyte adhesion molecule<br>gene:ENSG00000166250 /// Uncharacterized protein ENSP00000376525 (Fragment)<br>gene:ENSG00000166250 /// Homo sapiens adipocyte adhesion molecule mRNA, complete cds. /// Homo sapiens adipocyte-specific adhesion molecule (ASAM), mRNA.                                                                                                                                                                                                                                                                                                                                                                                                            | adipocyte-specific adhesion molecule                 | 0.004035<br>831 | 1.172514<br>888      |
| OR52A1 | Olfactory receptor 52A1<br>gene:ENSG00000182070 /// Olfactory receptor 52A1<br>gene:ENSG00000182070 /// Homo sapiens olfactory receptor, family 52, subfamily A, member 1 (OR52A1), mRNA.                                                                                                                                                                                                                                                                                                                                                                                                                                                                                          | olfactory receptor, family 52, subfamily A, member 1 | 0.000979<br>942 | -<br>1.468881<br>348 |

|         |                                                                                                                                                                                                                                                                                                                                                                                                                                                                                                                                                                                                                                                                                                                                                                                                                                                                                                                                                                                                                                                                                                                                                                                                                                                                                                                                                                                                                                                                                                                                                                                                                                                                                                                           |                                                                                                                |                          |                                 |
|---------|---------------------------------------------------------------------------------------------------------------------------------------------------------------------------------------------------------------------------------------------------------------------------------------------------------------------------------------------------------------------------------------------------------------------------------------------------------------------------------------------------------------------------------------------------------------------------------------------------------------------------------------------------------------------------------------------------------------------------------------------------------------------------------------------------------------------------------------------------------------------------------------------------------------------------------------------------------------------------------------------------------------------------------------------------------------------------------------------------------------------------------------------------------------------------------------------------------------------------------------------------------------------------------------------------------------------------------------------------------------------------------------------------------------------------------------------------------------------------------------------------------------------------------------------------------------------------------------------------------------------------------------------------------------------------------------------------------------------------|----------------------------------------------------------------------------------------------------------------|--------------------------|---------------------------------|
| CNTNAP3 | <p>cdna:known<br/> supercontig::NT_113912:33219:1431<br/> 76:-1 gene:ENSG00000219070 ///<br/> Isoform 1 of Contactin-associated<br/> protein-like 3<br/> gene:ENSG00000106714 /// Putative<br/> uncharacterized protein CNTNAP3<br/> gene:ENSG00000106714 /// cDNA<br/> FLJ58810, highly similar to Contactin-<br/> associated protein-like 3<br/> gene:ENSG00000106714 ///<br/> Contactin associated protein-like 3<br/> gene:ENSG00000106714 /// Putative<br/> uncharacterized protein CNTNAP3<br/> gene:ENSG00000106714 ///<br/> Contactin associated protein-like 3<br/> gene:ENSG00000106714 ///<br/> Contactin associated protein-like 3<br/> gene:ENSG00000106714 ///<br/> cdna:known<br/> chromosome:NCBI36:9:40297346:403<br/> 29528:1 gene:ENSG00000185020 ///<br/> 81 kDa protein<br/> gene:ENSG00000154529 /// Protein<br/> gene:ENSG00000154529 /// Isoform<br/> 1 of Contactin-associated protein-like<br/> 3B gene:ENSG00000154529 ///<br/> hypothetical protein<br/> gene:ENSG00000154529 /// Isoform<br/> 3 of Contactin-associated protein-like<br/> 3B gene:ENSG00000154529 ///<br/> Isoform 2 of Contactin-associated<br/> protein-like 3B<br/> gene:ENSG00000154529 ///<br/> hypothetical protein<br/> gene:ENSG00000188377 /// similar to<br/> cell recognition molecule CASPR3<br/> gene:ENSG00000188377 ///<br/> hypothetical protein<br/> gene:ENSG00000204798 /// similar to<br/> cell recognition molecule CASPR3<br/> gene:ENSG00000204798 /// Homo<br/> sapiens cell recognition molecule<br/> CASPR3 mRNA, complete cds. ///<br/> Homo sapiens cDNA FLJ30083 fis,<br/> clone BGGI12001097, weakly similar<br/> to Homo sapiens contactin associated<br/> protein (Caspr) mRNA. /// Homo</p> | <p>contactin associated<br/> protein-like 3 ///<br/> similar to cell<br/> recognition molecule<br/> CASPR3</p> | <p>0.025225<br/> 101</p> | <p>-<br/> 1.147983<br/> 011</p> |
|---------|---------------------------------------------------------------------------------------------------------------------------------------------------------------------------------------------------------------------------------------------------------------------------------------------------------------------------------------------------------------------------------------------------------------------------------------------------------------------------------------------------------------------------------------------------------------------------------------------------------------------------------------------------------------------------------------------------------------------------------------------------------------------------------------------------------------------------------------------------------------------------------------------------------------------------------------------------------------------------------------------------------------------------------------------------------------------------------------------------------------------------------------------------------------------------------------------------------------------------------------------------------------------------------------------------------------------------------------------------------------------------------------------------------------------------------------------------------------------------------------------------------------------------------------------------------------------------------------------------------------------------------------------------------------------------------------------------------------------------|----------------------------------------------------------------------------------------------------------------|--------------------------|---------------------------------|

|  |                                                              |  |  |  |
|--|--------------------------------------------------------------|--|--|--|
|  | sapiens contactin associated protein-like 3 (CNTNAP3), mRNA. |  |  |  |
|--|--------------------------------------------------------------|--|--|--|

|         |                                                                                                                                                                                                                                                                                                                                                                                                                                                                                                                                                                                                                                                                                                                                              |                                                                                                                                                                                                                                       |                 |                      |
|---------|----------------------------------------------------------------------------------------------------------------------------------------------------------------------------------------------------------------------------------------------------------------------------------------------------------------------------------------------------------------------------------------------------------------------------------------------------------------------------------------------------------------------------------------------------------------------------------------------------------------------------------------------------------------------------------------------------------------------------------------------|---------------------------------------------------------------------------------------------------------------------------------------------------------------------------------------------------------------------------------------|-----------------|----------------------|
| OR4F3   | <p>Olfactory receptor 4F21<br/> gene:ENSG00000176269 /// Olfactory receptor 4F3/4F16/4F29<br/> gene:ENSG00000183127 /// Olfactory receptor 4F3/4F16/4F29<br/> gene:ENSG00000177799 /// Olfactory receptor 4F3/4F16/4F29<br/> gene:ENSG00000185097 /// Homo sapiens olfactory receptor, family 4, subfamily F, member 29, mRNA (cDNA clone MGC:169170 IMAGE:9021547), complete cds. /// Homo sapiens olfactory receptor, family 4, subfamily F, member 21 (OR4F21), mRNA. /// Homo sapiens olfactory receptor, family 4, subfamily F, member 29 (OR4F29), mRNA. /// Homo sapiens olfactory receptor, family 4, subfamily F, member 3 (OR4F3), mRNA. /// Homo sapiens olfactory receptor, family 4, subfamily F, member 16 (OR4F16), mRNA.</p> | <p>olfactory receptor, family 4, subfamily F, member 3 /// olfactory receptor, family 4, subfamily F, member 16 /// olfactory receptor, family 4, subfamily F, member 29 /// olfactory receptor, family 4, subfamily F, member 21</p> | 0.002942<br>496 | -<br>1.387172<br>027 |
| SLC24A6 | <p>Isoform 1 of Sodium/potassium/calcium exchanger 6 gene:ENSG00000089060 /// Isoform 2 of Sodium/potassium/calcium exchanger 6 gene:ENSG00000089060 /// Homo sapiens solute carrier family 24 (sodium/potassium/calcium exchanger), member 6, mRNA (cDNA clone MGC:120605 IMAGE:40026360), complete cds. /// Homo sapiens solute carrier family 24 (sodium/potassium/calcium exchanger), member 6 (SLC24A6), mRNA.</p>                                                                                                                                                                                                                                                                                                                      | <p>solute carrier family 24 (sodium/potassium/calcium exchanger), member 6</p>                                                                                                                                                        | 0.008297<br>168 | -<br>1.172206<br>281 |
| TMED4   | <p>Isoform 1 of Transmembrane emp24 domain-containing protein 4 gene:ENSG00000158604 /// Homo sapiens transmembrane emp24 protein transport domain containing 4, mRNA (cDNA clone IMAGE:5184403). /// Homo sapiens transmembrane emp24 protein transport domain containing 4 (TMED4), mRNA.</p>                                                                                                                                                                                                                                                                                                                                                                                                                                              | <p>transmembrane emp24 protein transport domain containing 4</p>                                                                                                                                                                      | 0.006377<br>635 | 1.175563<br>905      |



|        |                                                                                                                                                                                                                                                                                                                                                                                                                                                                                                            |                                                                  |                 |                     |
|--------|------------------------------------------------------------------------------------------------------------------------------------------------------------------------------------------------------------------------------------------------------------------------------------------------------------------------------------------------------------------------------------------------------------------------------------------------------------------------------------------------------------|------------------------------------------------------------------|-----------------|---------------------|
| LRFN5  | Leucine-rich repeat and fibronectin type-III domain-containing protein 5<br>gene:ENSG00000165379 /// Putative uncharacterized protein LRFN5<br>gene:ENSG00000165379 /// Homo sapiens cDNA FLJ56792 complete cds, highly similar to Leucine-rich repeat and fibronectin type-III domain-containing protein 5 precursor. /// Homo sapiens leucine rich repeat and fibronectin type III domain containing 5 (LRFN5), mRNA.                                                                                    | leucine rich repeat and fibronectin type III domain containing 5 | 0.000362<br>11  | -<br>1.416485<br>26 |
| LRIG3  | Isoform 1 of Leucine-rich repeats and immunoglobulin-like domains protein 3<br>gene:ENSG00000139263 /// Isoform 2 of Leucine-rich repeats and immunoglobulin-like domains protein 3<br>gene:ENSG00000139263 /// Homo sapiens clone DNA37140 SAPS287 (UNQ287) mRNA, complete cds. /// Homo sapiens leucine-rich repeats and immunoglobulin-like domains 3 (LRIG3), transcript variant 1, mRNA. /// Homo sapiens leucine-rich repeats and immunoglobulin-like domains 3 (LRIG3), transcript variant 2, mRNA. | leucine-rich repeats and immunoglobulin-like domains 3           | 6.0119E-<br>05  | 1.364636<br>467     |
| ICOSLG | Isoform 1 of ICOS ligand<br>gene:ENSG00000160223 /// Isoform 2 of ICOS ligand<br>gene:ENSG00000160223 /// Isoform 2 of ICOS ligand<br>gene:ENSG00000160223 /// Putative uncharacterized protein ICOSLG<br>gene:ENSG00000160223 /// Putative uncharacterized protein ICOSLG<br>gene:ENSG00000160223 /// Isoform 1 of ICOS ligand<br>gene:ENSG00000160223 /// Homo sapiens mRNA for KIAA0653 protein, partial cds. /// Homo sapiens inducible T-cell co-stimulator ligand (ICOSLG), mRNA.                    | inducible T-cell co-stimulator ligand                            | 0.009116<br>454 | -<br>1.216412<br>06 |

|         |                                                                                                                                                                                                                                                                                                                                                                                                                                                                                                                                                                                                                                                                                                                                                                                                                                                                                                                                   |                                                    |                 |                      |
|---------|-----------------------------------------------------------------------------------------------------------------------------------------------------------------------------------------------------------------------------------------------------------------------------------------------------------------------------------------------------------------------------------------------------------------------------------------------------------------------------------------------------------------------------------------------------------------------------------------------------------------------------------------------------------------------------------------------------------------------------------------------------------------------------------------------------------------------------------------------------------------------------------------------------------------------------------|----------------------------------------------------|-----------------|----------------------|
| LRRTM4  | <p>cdna:known<br/> chromosome:NCBI36:2:76828353:776<br/> 02973:-1 gene:ENSG00000176204 ///</p> <p>cdna:known<br/> chromosome:NCBI36:2:76829187:776<br/> 02907:-1 gene:ENSG00000176204 ///</p> <p>cdna:known<br/> chromosome:NCBI36:2:76829192:776<br/> 03002:-1 gene:ENSG00000176204 ///</p> <p>Isoform 1 of Leucine-rich repeat<br/> transmembrane neuronal protein 4<br/> gene:ENSG00000176204 ///</p> <p>cdna:known<br/> chromosome:NCBI36:2:77597302:776<br/> 03010:-1 gene:ENSG00000176204 ///</p> <p>cdna:known<br/> chromosome:NCBI36:2:77598150:776<br/> 02844:-1 gene:ENSG00000176204 ///</p> <p>Homo sapiens clone DNA142392<br/> GFHL3075 (UNQ3075) mRNA,<br/> complete cds. /// Homo sapiens<br/> leucine rich repeat transmembrane<br/> neuronal 4 (LRRTM4), transcript<br/> variant 1, mRNA. /// Homo sapiens<br/> leucine rich repeat transmembrane<br/> neuronal 4 (LRRTM4), transcript<br/> variant 2, mRNA.</p> | leucine rich repeat<br>transmembrane<br>neuronal 4 | 0.003274<br>88  | -<br>1.221016<br>835 |
| GPR158  | <p>Probable G-protein coupled receptor<br/> 158 gene:ENSG00000151025 ///</p> <p>Homo sapiens G protein coupled<br/> receptor 158 (GPR158) mRNA,<br/> complete cds. /// Homo sapiens G<br/> protein-coupled receptor 158<br/> (GPR158), mRNA.</p>                                                                                                                                                                                                                                                                                                                                                                                                                                                                                                                                                                                                                                                                                  | G protein-coupled<br>receptor 158                  | 0.008561<br>092 | -<br>1.287914<br>435 |
| C9orf46 | <p>Transmembrane protein C9orf46<br/> gene:ENSG00000107020 /// Homo<br/> sapiens uncharacterized<br/> hematopoietic stem/progenitor cells<br/> protein MDS030 mRNA, complete<br/> cds. /// Homo sapiens AD025 mRNA,<br/> complete cds.</p>                                                                                                                                                                                                                                                                                                                                                                                                                                                                                                                                                                                                                                                                                        | chromosome 9 open<br>reading frame 46              | 0.003702<br>152 | 1.261456<br>637      |
| TCTN2   | <p>Tectonic-2 gene:ENSG00000168778<br/> /// Homo sapiens TECT2 (TECT2)<br/> mRNA, complete cds. /// Homo<br/> sapiens tectonic family member 2<br/> (TCTN2), mRNA.</p>                                                                                                                                                                                                                                                                                                                                                                                                                                                                                                                                                                                                                                                                                                                                                            | tectonic family<br>member 2                        | 0.003700<br>585 | 1.224374<br>462      |

|                            |                                                                                                                                                                                                                                                                                                                                                                                                                          |                                     |                   |                 |
|----------------------------|--------------------------------------------------------------------------------------------------------------------------------------------------------------------------------------------------------------------------------------------------------------------------------------------------------------------------------------------------------------------------------------------------------------------------|-------------------------------------|-------------------|-----------------|
| C6orf162                   | Uncharacterized protein C6orf162 gene:ENSG00000111850 /// Uncharacterized protein C6orf162 gene:ENSG00000111850 /// Homo sapiens chromosome 6 open reading frame 162, mRNA (cDNA clone MGC:88247 IMAGE:6452586), complete cds. /// Homo sapiens chromosome 6 open reading frame 162 (C6orf162), transcript variant 2, mRNA. /// Homo sapiens chromosome 6 open reading frame 162 (C6orf162), transcript variant 1, mRNA. | chromosome 6 open reading frame 162 | 0.003066<br>727   | 1.199326<br>745 |
| GPR63                      | Probable G-protein coupled receptor 63 gene:ENSG00000112218 /// Probable G-protein coupled receptor 63 gene:ENSG00000112218 /// Homo sapiens mRNA for PSP24, complete cds. /// Homo sapiens G protein-coupled receptor 63 (GPR63), mRNA.                                                                                                                                                                                 | G protein-coupled receptor 63       | 0.006011<br>659   | 1.188591<br>54  |
| GPR172A                    | Porcine endogenous retrovirus A receptor 1 gene:ENSG00000185803 /// Porcine endogenous retrovirus A receptor 1 gene:ENSG00000185803 /// Homo sapiens cDNA FLJ11856 fis, clone HEMBA1006789. /// Homo sapiens G protein-coupled receptor 172A (GPR172A), mRNA.                                                                                                                                                            | G protein-coupled receptor 172A     | 0.002766<br>543   | 1.174820<br>046 |
| <b>Functional Group 46</b> | <b>Transcript Description</b>                                                                                                                                                                                                                                                                                                                                                                                            | <b>Gene Title</b>                   | <b>Bayes.In p</b> | <b>Fold</b>     |

|       |                                                                                                                                                                                                                                                                                                                                                                                                                                                                                                                                                                                                                                                                                |                                         |                 |                      |
|-------|--------------------------------------------------------------------------------------------------------------------------------------------------------------------------------------------------------------------------------------------------------------------------------------------------------------------------------------------------------------------------------------------------------------------------------------------------------------------------------------------------------------------------------------------------------------------------------------------------------------------------------------------------------------------------------|-----------------------------------------|-----------------|----------------------|
| FBXW7 | <p>Isoform 4 of F-box/WD repeat-containing protein 7<br/> gene:ENSG00000109670 /// Isoform 1 of F-box/WD repeat-containing protein 7 gene:ENSG00000109670 /// Isoform 2 of F-box/WD repeat-containing protein 7<br/> gene:ENSG00000109670 /// Isoform 1 of F-box/WD repeat-containing protein 7 gene:ENSG00000109670 /// Homo sapiens archipelago alpha form mRNA, complete cds. /// Homo sapiens F-box and WD repeat domain containing 7 (FBXW7), transcript variant 1, mRNA. /// Homo sapiens F-box and WD repeat domain containing 7 (FBXW7), transcript variant 3, mRNA. /// Homo sapiens F-box and WD repeat domain containing 7 (FBXW7), transcript variant 2, mRNA.</p> | F-box and WD repeat domain containing 7 | 0.000408<br>298 | -<br>1.278626<br>563 |
| WDR6  | <p>WD repeat domain 6 protein<br/> gene:ENSG00000178252 /// WD repeat-containing protein 6<br/> gene:ENSG00000178252 /// cDNA FLJ10218 fis, clone HEMBA1006936<br/> gene:ENSG00000178252 /// Homo sapiens WD-repeat protein 6 (WDR6) mRNA, complete cds. /// Homo sapiens WD repeat domain 6 (WDR6), mRNA.</p>                                                                                                                                                                                                                                                                                                                                                                 | WD repeat domain 6                      | 0.001638<br>454 | 1.179558<br>541      |

|         |                                                                                                                                                                                                                                                                                                                                                                                                                                                                                                                                                                                                                                                                                                        |                                                                                 |                    |                     |
|---------|--------------------------------------------------------------------------------------------------------------------------------------------------------------------------------------------------------------------------------------------------------------------------------------------------------------------------------------------------------------------------------------------------------------------------------------------------------------------------------------------------------------------------------------------------------------------------------------------------------------------------------------------------------------------------------------------------------|---------------------------------------------------------------------------------|--------------------|---------------------|
| PPP2R2C | <p>gamma isoform of regulatory subunit B55, protein phosphatase 2 isoform b<br/> gene:ENSG00000074211 /// Protein phosphatase 2 (Formerly 2A), regulatory subunit B (PR 52), gamma isoform, isoform CRA_b<br/> gene:ENSG00000074211 /// Serine/threonine-protein phosphatase 2A 55 kDa regulatory subunit B gamma isoform<br/> gene:ENSG00000074211 /// Homo sapiens protein phosphatase 2A1 B gamma subunit mRNA, complete cds. /// Homo sapiens protein phosphatase 2 (formerly 2A), regulatory subunit B, gamma isoform (PPP2R2C), transcript variant 1, mRNA. /// Homo sapiens protein phosphatase 2 (formerly 2A), regulatory subunit B, gamma isoform (PPP2R2C), transcript variant 2, mRNA.</p> | <p>protein phosphatase 2 (formerly 2A), regulatory subunit B, gamma isoform</p> | <p>0.000746615</p> | <p>-1.256320113</p> |
|---------|--------------------------------------------------------------------------------------------------------------------------------------------------------------------------------------------------------------------------------------------------------------------------------------------------------------------------------------------------------------------------------------------------------------------------------------------------------------------------------------------------------------------------------------------------------------------------------------------------------------------------------------------------------------------------------------------------------|---------------------------------------------------------------------------------|--------------------|---------------------|

|         |                                                                                                                                                                                                                                                                                                                                                                                                                                                                                                                                                                                                                                                                                                                                                                                                                                                                                                                                                                                                                                                                                                                                                                                                                                                                                                                                                                                                                                                                                                                                                                                  |                                                                         |                 |                 |
|---------|----------------------------------------------------------------------------------------------------------------------------------------------------------------------------------------------------------------------------------------------------------------------------------------------------------------------------------------------------------------------------------------------------------------------------------------------------------------------------------------------------------------------------------------------------------------------------------------------------------------------------------------------------------------------------------------------------------------------------------------------------------------------------------------------------------------------------------------------------------------------------------------------------------------------------------------------------------------------------------------------------------------------------------------------------------------------------------------------------------------------------------------------------------------------------------------------------------------------------------------------------------------------------------------------------------------------------------------------------------------------------------------------------------------------------------------------------------------------------------------------------------------------------------------------------------------------------------|-------------------------------------------------------------------------|-----------------|-----------------|
| PPP2R2B | <p>Serine/threonine-protein phosphatase 2A 55 kDa regulatory subunit B beta isoform<br/> gene:ENSG00000156475 ///</p> <p>Serine/threonine-protein phosphatase 2A 55 kDa regulatory subunit B beta isoform<br/> gene:ENSG00000156475 ///</p> <p>Serine/threonine-protein phosphatase 2A 55 kDa regulatory subunit B beta isoform<br/> gene:ENSG00000156475 /// beta isoform of regulatory subunit B55, protein phosphatase 2 isoform d<br/> gene:ENSG00000156475 ///</p> <p>Serine/threonine-protein phosphatase 2A 55 kDa regulatory subunit B beta isoform<br/> gene:ENSG00000156475 ///</p> <p>Serine/threonine-protein phosphatase 2A 55 kDa regulatory subunit B beta isoform<br/> gene:ENSG00000156475 /// beta isoform of regulatory subunit B55, protein phosphatase 2 isoform b<br/> gene:ENSG00000156475 /// Human protein phosphatase 2A beta subunit mRNA, complete cds. /// Homo sapiens protein phosphatase 2 (formerly 2A), regulatory subunit B, beta isoform (PPP2R2B), transcript variant 6, mRNA. /// Homo sapiens protein phosphatase 2 (formerly 2A), regulatory subunit B, beta isoform (PPP2R2B), transcript variant 7, mRNA. /// Homo sapiens protein phosphatase 2 (formerly 2A), regulatory subunit B, beta isoform (PPP2R2B), transcript variant 1, mRNA. /// Homo sapiens protein phosphatase 2 (formerly 2A), regulatory subunit B, beta isoform (PPP2R2B), transcript variant 2, mRNA. /// Homo sapiens protein phosphatase 2 (formerly 2A), regulatory subunit B, beta isoform (PPP2R2B), transcript variant 3, mRNA. /// Homo sapiens protein</p> | protein phosphatase 2 (formerly 2A), regulatory subunit B, beta isoform | 0.000647<br>202 | 1.272802<br>742 |
|---------|----------------------------------------------------------------------------------------------------------------------------------------------------------------------------------------------------------------------------------------------------------------------------------------------------------------------------------------------------------------------------------------------------------------------------------------------------------------------------------------------------------------------------------------------------------------------------------------------------------------------------------------------------------------------------------------------------------------------------------------------------------------------------------------------------------------------------------------------------------------------------------------------------------------------------------------------------------------------------------------------------------------------------------------------------------------------------------------------------------------------------------------------------------------------------------------------------------------------------------------------------------------------------------------------------------------------------------------------------------------------------------------------------------------------------------------------------------------------------------------------------------------------------------------------------------------------------------|-------------------------------------------------------------------------|-----------------|-----------------|

|       |                                                                                                                                                                                                                                                                                                                                                                                                                                                                                           |                     |                 |                 |
|-------|-------------------------------------------------------------------------------------------------------------------------------------------------------------------------------------------------------------------------------------------------------------------------------------------------------------------------------------------------------------------------------------------------------------------------------------------------------------------------------------------|---------------------|-----------------|-----------------|
|       | <p>phosphatase 2 (formerly 2A), regulatory subunit B, beta isoform (PPP2R2B), transcript variant 4, mRNA. /// Homo sapiens protein phosphatase 2 (formerly 2A), regulatory subunit B, beta isoform (PPP2R2B), transcript variant 5, mRNA.</p>                                                                                                                                                                                                                                             |                     |                 |                 |
| WDR23 | <p>Isoform 1 of WD repeat-containing protein 23 gene:ENSG00000100897 /// Isoform 3 of WD repeat-containing protein 23 gene:ENSG00000100897 /// Isoform 3 of WD repeat-containing protein 23 gene:ENSG00000100897 /// Isoform 2 of WD repeat-containing protein 23 gene:ENSG00000100897 /// Homo sapiens GLO14 mRNA, complete cds. /// Homo sapiens WD repeat domain 23 (WDR23), transcript variant 2, mRNA. /// Homo sapiens WD repeat domain 23 (WDR23), transcript variant 1, mRNA.</p> | WD repeat domain 23 | 0.007992<br>413 | 1.194928<br>291 |

|                            |                                                                                                                                                                                                                                                                                                                                                                                                                                                                                                                                                                                                                   |                                                                   |                   |              |
|----------------------------|-------------------------------------------------------------------------------------------------------------------------------------------------------------------------------------------------------------------------------------------------------------------------------------------------------------------------------------------------------------------------------------------------------------------------------------------------------------------------------------------------------------------------------------------------------------------------------------------------------------------|-------------------------------------------------------------------|-------------------|--------------|
| WIPI1                      | Isoform 1 of WD repeat domain phosphoinositide-interacting protein 1 gene:ENSG00000070540 /// Homo sapiens WD repeat domain, phosphoinositide interacting 1, mRNA (cDNA clone MGC:49021 IMAGE:6055425), complete cds. /// Homo sapiens WD repeat domain, phosphoinositide interacting 1 (WIPI1), mRNA.                                                                                                                                                                                                                                                                                                            | WD repeat domain, phosphoinositide interacting 1                  | 0.008353017       | 1.185284565  |
| NEDD1                      | Protein NEDD1 gene:ENSG00000139350 /// Homo sapiens cDNA, FLJ79470 complete cds, highly similar to Protein NEDD1. /// Homo sapiens neural precursor cell expressed, developmentally down-regulated 1 (NEDD1), transcript variant 1, mRNA. /// Homo sapiens neural precursor cell expressed, developmentally down-regulated 1 (NEDD1), transcript variant 2, mRNA. /// Homo sapiens neural precursor cell expressed, developmentally down-regulated 1 (NEDD1), transcript variant 3, mRNA. /// Homo sapiens neural precursor cell expressed, developmentally down-regulated 1 (NEDD1), transcript variant 4, mRNA. | neural precursor cell expressed, developmentally down-regulated 1 | 0.003434285       | 1.195487635  |
| <b>Functional Group 47</b> | <b>Transcript Description</b>                                                                                                                                                                                                                                                                                                                                                                                                                                                                                                                                                                                     | <b>Gene Title</b>                                                 | <b>Bayes.In p</b> | <b>Fold</b>  |
| TNFAIP1                    | BTB/POZ domain-containing protein TNFAIP1 gene:ENSG00000109079 /// Human B12 protein mRNA, complete cds. /// Homo sapiens tumor necrosis factor, alpha-induced protein 1 (endothelial) (TNFAIP1), mRNA.                                                                                                                                                                                                                                                                                                                                                                                                           | tumor necrosis factor, alpha-induced protein 1 (endothelial)      | 0.000362902       | -1.234772617 |



|       |                                                                                                                                                                                                                                                                                                                                                                                                                                                                                                                                                                                                                                                                                                                                                                                                                                                                                                                                                                                                                                                                                                                                                                                                                                                                                                                                                                                                                                                                                                                                                                                                                  |                                                                    |                |                      |
|-------|------------------------------------------------------------------------------------------------------------------------------------------------------------------------------------------------------------------------------------------------------------------------------------------------------------------------------------------------------------------------------------------------------------------------------------------------------------------------------------------------------------------------------------------------------------------------------------------------------------------------------------------------------------------------------------------------------------------------------------------------------------------------------------------------------------------------------------------------------------------------------------------------------------------------------------------------------------------------------------------------------------------------------------------------------------------------------------------------------------------------------------------------------------------------------------------------------------------------------------------------------------------------------------------------------------------------------------------------------------------------------------------------------------------------------------------------------------------------------------------------------------------------------------------------------------------------------------------------------------------|--------------------------------------------------------------------|----------------|----------------------|
| TRPC4 | <p>transient receptor potential cation channel, subfamily C, member 4 isoform epsilon<br/> gene:ENSG00000133107 /// Transient receptor potential cation channel, subfamily C, member 4, isoform CRA_b gene:ENSG00000133107 /// transient receptor potential cation channel, subfamily C, member 4 isoform zeta gene:ENSG00000133107 /// Isoform Alpha of Short transient receptor potential channel 4 gene:ENSG00000133107 /// transient receptor potential cation channel, subfamily C, member 4 isoform zeta gene:ENSG00000133107 /// Isoform Delta of Short transient receptor potential channel 4 gene:ENSG00000133107 /// Isoform Gamma of Short transient receptor potential channel 4 gene:ENSG00000133107 /// Isoform Beta of Short transient receptor potential channel 4 gene:ENSG00000133107 /// Homo sapiens mRNA; cDNA DKFZp686M09131 (from clone DKFZp686M09131). /// Homo sapiens transient receptor potential cation channel, subfamily C, member 4 (TRPC4), transcript variant alpha, mRNA. /// Homo sapiens transient receptor potential cation channel, subfamily C, member 4 (TRPC4), transcript variant epsilon, mRNA. /// Homo sapiens transient receptor potential cation channel, subfamily C, member 4 (TRPC4), transcript variant beta, mRNA. /// Homo sapiens transient receptor potential cation channel, subfamily C, member 4 (TRPC4), transcript variant gamma, mRNA. /// Homo sapiens transient receptor potential cation channel, subfamily C, member 4 (TRPC4), transcript variant delta, mRNA. /// Homo sapiens transient receptor potential cation channel, subfamily C,</p> | transient receptor potential cation channel, subfamily C, member 4 | 0.008809<br>03 | -<br>1.183446<br>434 |
|-------|------------------------------------------------------------------------------------------------------------------------------------------------------------------------------------------------------------------------------------------------------------------------------------------------------------------------------------------------------------------------------------------------------------------------------------------------------------------------------------------------------------------------------------------------------------------------------------------------------------------------------------------------------------------------------------------------------------------------------------------------------------------------------------------------------------------------------------------------------------------------------------------------------------------------------------------------------------------------------------------------------------------------------------------------------------------------------------------------------------------------------------------------------------------------------------------------------------------------------------------------------------------------------------------------------------------------------------------------------------------------------------------------------------------------------------------------------------------------------------------------------------------------------------------------------------------------------------------------------------------|--------------------------------------------------------------------|----------------|----------------------|

|  |                                                  |  |  |  |
|--|--------------------------------------------------|--|--|--|
|  | member 4 (TRPC4), transcript variant zeta, mRNA. |  |  |  |
|--|--------------------------------------------------|--|--|--|

|         |                                                                                                                                                                                                                                                                                                                                                                                                                                                                                                                                                                                                                                                                                                                                                                                                                                                                                                                                                      |                                                              |                 |                      |
|---------|------------------------------------------------------------------------------------------------------------------------------------------------------------------------------------------------------------------------------------------------------------------------------------------------------------------------------------------------------------------------------------------------------------------------------------------------------------------------------------------------------------------------------------------------------------------------------------------------------------------------------------------------------------------------------------------------------------------------------------------------------------------------------------------------------------------------------------------------------------------------------------------------------------------------------------------------------|--------------------------------------------------------------|-----------------|----------------------|
| CACNA1B | <p>Isoform Alpha-1B-1 of Voltage-dependent N-type calcium channel subunit alpha-1B<br/> gene:ENSG00000148408 /// Calcium channel, voltage-dependent, N type, alpha 1B subunit<br/> gene:ENSG00000148408 /// Calcium channel, voltage-dependent, N type, alpha 1B subunit<br/> gene:ENSG00000148408 /// Calcium channel, voltage-dependent, N type, alpha 1B subunit<br/> gene:ENSG00000148408 /// Isoform Alpha-1B-1 of Voltage-dependent N-type calcium channel subunit alpha-1B<br/> gene:ENSG00000148408 /// Calcium channel, voltage-dependent, N type, alpha 1B subunit<br/> gene:ENSG00000148408 /// Calcium channel alpha12.2 subunit (Fragment)<br/> gene:ENSG00000148408 /// Calcium channel, voltage-dependent, N type, alpha 1B subunit<br/> gene:ENSG00000148408 /// Human N-type calcium channel alpha-1 subunit mRNA, complete cds. /// Homo sapiens calcium channel, voltage-dependent, N type, alpha 1B subunit (CACNA1B), mRNA.</p> | calcium channel, voltage-dependent, N type, alpha 1B subunit | 0.008512<br>488 | -<br>1.218059<br>768 |
| CNGB1   | <p>cyclic nucleotide gated channel beta 1 isoform a<br/> gene:ENSG00000070729 /// cyclic nucleotide gated channel beta 1 isoform b<br/> gene:ENSG00000070729 /// Human cGMP-gated cation channel beta subunit (CNCG2) mRNA, complete cds. /// Homo sapiens cyclic nucleotide gated channel beta 1 (CNGB1), transcript variant 1, mRNA. /// Homo sapiens cyclic nucleotide gated channel beta 1 (CNGB1), transcript variant 2, mRNA.</p>                                                                                                                                                                                                                                                                                                                                                                                                                                                                                                              | cyclic nucleotide gated channel beta 1                       | 0.008471<br>151 | -<br>1.237879<br>459 |

|          |                                                                                                                                                                                                                                                                                                                                                                                                                                                                                  |                                                                      |             |              |
|----------|----------------------------------------------------------------------------------------------------------------------------------------------------------------------------------------------------------------------------------------------------------------------------------------------------------------------------------------------------------------------------------------------------------------------------------------------------------------------------------|----------------------------------------------------------------------|-------------|--------------|
| KCNH8    | Potassium voltage-gated channel subfamily H member 8<br>gene:ENSG00000183960 /// Homo sapiens mRNA for potassium voltage-gated channel, subfamily H, member 8 variant protein. /// Homo sapiens potassium voltage-gated channel, subfamily H (eag-related), member 8 (KCNH8), mRNA.                                                                                                                                                                                              | potassium voltage-gated channel, subfamily H (eag-related), member 8 | 0.00168409  | -1.34383154  |
| CACNA2D1 | Voltage-dependent calcium channel subunit alpha-2/delta-1<br>gene:ENSG00000153956 /// Dihydropyridine receptor alpha 2 subunit gene:ENSG00000153956 /// Neuronal voltage-dependent calcium channel alpha 2A subunit gene:ENSG00000153956 /// Homo sapiens calcium channel, voltage-dependent, alpha 2/delta subunit 1, mRNA (cDNA clone MGC:151077 IMAGE:40126019), complete cds. /// Homo sapiens calcium channel, voltage-dependent, alpha 2/delta subunit 1 (CACNA2D1), mRNA. | calcium channel, voltage-dependent, alpha 2/delta subunit 1          | 0.003043243 | -1.170202839 |
| CHRNA9   | Neuronal acetylcholine receptor subunit alpha-9<br>gene:ENSG00000174343 /// Homo sapiens cholinergic receptor, nicotinic, alpha 9, mRNA (cDNA clone MGC:142109 IMAGE:8322601), complete cds. /// Homo sapiens cholinergic receptor, nicotinic, alpha 9 (CHRNA9), mRNA.                                                                                                                                                                                                           | cholinergic receptor, nicotinic, alpha 9                             | 0.008365153 | -1.272045213 |
| GABRE    | Gamma-aminobutyric acid receptor subunit epsilon<br>gene:ENSG00000102287 /// Putative uncharacterized protein GABRE<br>gene:ENSG00000102287 /// Putative uncharacterized protein GABRE<br>gene:ENSG00000102287 /// 42 kDa protein gene:ENSG00000102287 /// Homo sapiens gamma-aminobutyric acid (GABA) A receptor, epsilon, mRNA (cDNA clone MGC:26504 IMAGE:4798754), complete cds. /// Homo sapiens gamma-aminobutyric                                                         | gamma-aminobutyric acid (GABA) A receptor, epsilon                   | 4.29924E-10 | -2.02462221  |

|      |                                                                                                                                                                                                                                                                  |                                           |                 |                      |
|------|------------------------------------------------------------------------------------------------------------------------------------------------------------------------------------------------------------------------------------------------------------------|-------------------------------------------|-----------------|----------------------|
|      | acid (GABA) A receptor, epsilon (GABRE), mRNA.                                                                                                                                                                                                                   |                                           |                 |                      |
| PLLP | Plasmolipin gene:ENSG00000102934<br>/// Homo sapiens plasma membrane proteolipid (plasmolipin), mRNA (cDNA clone MGC:3357 IMAGE:3633345), complete cds. /// Homo sapiens plasma membrane proteolipid (plasmolipin) (PLLP), mRNA.                                 | plasma membrane proteolipid (plasmolipin) | 0.009037<br>296 | -<br>1.203153<br>59  |
| CD83 | CD83 antigen gene:ENSG00000112149 /// Homo sapiens CD83 molecule, mRNA (cDNA clone MGC:26322 IMAGE:4818856), complete cds. /// Homo sapiens CD83 molecule (CD83), transcript variant 1, mRNA. /// Homo sapiens CD83 molecule (CD83), transcript variant 2, mRNA. | CD83 molecule                             | 0.009333<br>693 | -<br>1.200761<br>833 |

|       |                                                                                                                                                                                                                                                                                                                                                                                                                                                                                                                                                                                                                                                                                                                                                                                                                                                                                                                                                                                                                                                                                                                                                                                                                                      |                                                                |                 |                 |
|-------|--------------------------------------------------------------------------------------------------------------------------------------------------------------------------------------------------------------------------------------------------------------------------------------------------------------------------------------------------------------------------------------------------------------------------------------------------------------------------------------------------------------------------------------------------------------------------------------------------------------------------------------------------------------------------------------------------------------------------------------------------------------------------------------------------------------------------------------------------------------------------------------------------------------------------------------------------------------------------------------------------------------------------------------------------------------------------------------------------------------------------------------------------------------------------------------------------------------------------------------|----------------------------------------------------------------|-----------------|-----------------|
| KCNRG | <p>Isoform Alpha of Tripartite motif-containing protein 13<br/> gene:ENSG00000204977 /// ret finger protein 2 isoform 2<br/> gene:ENSG00000204977 /// Isoform Alpha of Tripartite motif-containing protein 13<br/> gene:ENSG00000204977 /// Isoform Alpha of Tripartite motif-containing protein 13<br/> gene:ENSG00000204977 /// Isoform 2 of Putative potassium channel regulatory protein<br/> gene:ENSG00000198553 /// Isoform 1 of Putative potassium channel regulatory protein<br/> gene:ENSG00000198553 /// Homo sapiens putative potassium channel proteins regulator protein variant A (KCNRG) mRNA, complete cds; alternatively spliced. /// Homo sapiens leu5 (RFP2) mRNA, complete cds. /// Homo sapiens potassium channel regulator (KCNRG), transcript variant 1, mRNA. /// Homo sapiens tripartite motif-containing 13 (TRIM13), transcript variant 4, mRNA. /// Homo sapiens potassium channel regulator (KCNRG), transcript variant 2, mRNA. /// Homo sapiens tripartite motif-containing 13 (TRIM13), transcript variant 1, mRNA. /// Homo sapiens tripartite motif-containing 13 (TRIM13), transcript variant 2, mRNA. /// Homo sapiens tripartite motif-containing 13 (TRIM13), transcript variant 3, mRNA.</p> | potassium channel regulator /// tripartite motif-containing 13 | 0.008562<br>401 | 1.232643<br>517 |
|-------|--------------------------------------------------------------------------------------------------------------------------------------------------------------------------------------------------------------------------------------------------------------------------------------------------------------------------------------------------------------------------------------------------------------------------------------------------------------------------------------------------------------------------------------------------------------------------------------------------------------------------------------------------------------------------------------------------------------------------------------------------------------------------------------------------------------------------------------------------------------------------------------------------------------------------------------------------------------------------------------------------------------------------------------------------------------------------------------------------------------------------------------------------------------------------------------------------------------------------------------|----------------------------------------------------------------|-----------------|-----------------|

|         |                                                                                                                                                                                                                                                                                                                                                                                                                                                                                                                                                                                                                                                                                                  |                                                               |                 |                      |
|---------|--------------------------------------------------------------------------------------------------------------------------------------------------------------------------------------------------------------------------------------------------------------------------------------------------------------------------------------------------------------------------------------------------------------------------------------------------------------------------------------------------------------------------------------------------------------------------------------------------------------------------------------------------------------------------------------------------|---------------------------------------------------------------|-----------------|----------------------|
| SLC4A11 | cDNA FLJ56098, highly similar to Sodium bicarbonate transporter-like protein11 gene:ENSG00000088836 /// Isoform 1 of Sodium bicarbonate transporter-like protein 11 gene:ENSG00000088836 /// Homo sapiens solute carrier family 4, sodium borate transporter, member 11, mRNA (cDNA clone IMAGE:40035523), complete cds. /// Homo sapiens solute carrier family 4, sodium borate transporter, member 11 (SLC4A11), mRNA.                                                                                                                                                                                                                                                                         | solute carrier family 4, sodium borate transporter, member 11 | 0.001164<br>745 | -<br>1.202804<br>336 |
| KCNJ2   | Inward rectifier potassium channel 2 gene:ENSG00000123700 /// Homo sapiens inwardly-rectifying potassium channel Kir2.1 (KCNJ2) mRNA, complete cds. /// Homo sapiens potassium inwardly-rectifying channel, subfamily J, member 2 (KCNJ2), mRNA.                                                                                                                                                                                                                                                                                                                                                                                                                                                 | potassium inwardly-rectifying channel, subfamily J, member 2  | 0.000274<br>911 | -<br>1.367730<br>218 |
| KCNJ16  | Inward rectifier potassium channel 16 gene:ENSG00000153822 /// Inward rectifier potassium channel 16 gene:ENSG00000153822 /// Inward rectifier potassium channel 16 gene:ENSG00000153822 /// Homo sapiens potassium inwardly-rectifying channel, subfamily J, member 16, mRNA (cDNA clone MGC:33717 IMAGE:5262150), complete cds. /// Homo sapiens potassium inwardly-rectifying channel, subfamily J, member 16 (KCNJ16), transcript variant 2, mRNA. /// Homo sapiens potassium inwardly-rectifying channel, subfamily J, member 16 (KCNJ16), transcript variant 3, mRNA. /// Homo sapiens potassium inwardly-rectifying channel, subfamily J, member 16 (KCNJ16), transcript variant 1, mRNA. | potassium inwardly-rectifying channel, subfamily J, member 16 | 0.009416<br>39  | 1.352781<br>385      |

|       |                                                                                                                                                                                                                                                                                                                                                                                                                                                                                                                                                                                                                                                                                                                                                                                                                                                                                                                                                                                                                                                                                                                                                                                                                                                            |                                                  |                 |                      |
|-------|------------------------------------------------------------------------------------------------------------------------------------------------------------------------------------------------------------------------------------------------------------------------------------------------------------------------------------------------------------------------------------------------------------------------------------------------------------------------------------------------------------------------------------------------------------------------------------------------------------------------------------------------------------------------------------------------------------------------------------------------------------------------------------------------------------------------------------------------------------------------------------------------------------------------------------------------------------------------------------------------------------------------------------------------------------------------------------------------------------------------------------------------------------------------------------------------------------------------------------------------------------|--------------------------------------------------|-----------------|----------------------|
| CLCA2 | Calcium-activated chloride channel regulator 2 gene:ENSG00000137975<br>/// Homo sapiens CLCA family member 2, chloride channel regulator, mRNA (cDNA clone MGC:46036 IMAGE:5752653), complete cds. /// Homo sapiens CLCA family member 2, chloride channel regulator (CLCA2), mRNA.                                                                                                                                                                                                                                                                                                                                                                                                                                                                                                                                                                                                                                                                                                                                                                                                                                                                                                                                                                        | chloride channel regulator 2                     | 0.001357<br>236 | -<br>1.486668<br>361 |
| FXYD3 | Isoform 2 of FXYP domain-containing ion transport regulator 3 gene:ENSG00000089356 /// Isoform 1 of FXYP domain-containing ion transport regulator 3 gene:ENSG00000089356 /// Isoform 2 of FXYP domain-containing ion transport regulator 3 gene:ENSG00000089356 /// Isoform 1 of FXYP domain-containing ion transport regulator 3 gene:ENSG00000089356 /// Human 11kd protein mRNA, complete cds. /// Homo sapiens FXYP domain containing ion transport regulator 3 (FXYP3), transcript variant 1, mRNA. /// Homo sapiens FXYP domain containing ion transport regulator 3 (FXYP3), transcript variant 2, mRNA. /// Homo sapiens FXYP domain containing ion transport regulator 3 (FXYP3), transcript variant 3, mRNA. /// Homo sapiens FXYP domain containing ion transport regulator 3 (FXYP3), transcript variant 4, mRNA. /// Homo sapiens FXYP domain containing ion transport regulator 3 (FXYP3), transcript variant 5, mRNA. /// Homo sapiens FXYP domain containing ion transport regulator 3 (FXYP3), transcript variant 6, mRNA. /// Homo sapiens FXYP domain containing ion transport regulator 3 (FXYP3), transcript variant 7, mRNA. /// Homo sapiens FXYP domain containing ion transport regulator 3 (FXYP3), transcript variant 8, mRNA. | FXYP domain containing ion transport regulator 3 | 2.12739E<br>-05 | -<br>1.394300<br>248 |



|       |                                                                                                                                                                                                                                                                                                                                                                                                                                                                     |                                   |                 |                      |
|-------|---------------------------------------------------------------------------------------------------------------------------------------------------------------------------------------------------------------------------------------------------------------------------------------------------------------------------------------------------------------------------------------------------------------------------------------------------------------------|-----------------------------------|-----------------|----------------------|
| VDAC3 | Isoform 1 of Voltage-dependent anion-selective channel protein 3<br>gene:ENSG00000078668 /// Homo sapiens voltage-dependent anion channel 3, mRNA (cDNA clone MGC:64870 IMAGE:6163890), complete cds. /// Homo sapiens voltage-dependent anion channel 3 (VDAC3), transcript variant 2, mRNA. /// Homo sapiens voltage-dependent anion channel 3 (VDAC3), transcript variant 1, mRNA.                                                                               | voltage-dependent anion channel 3 | 0.003217<br>151 | 1.182094<br>071      |
| PODXL | Podocalyxin-like protein 1<br>gene:ENSG00000128567 /// podocalyxin-like isoform 1 precursor<br>gene:ENSG00000128567 /// Homo sapiens podocalyxin-like protein mRNA, complete cds. /// Homo sapiens podocalyxin-like (PODXL), transcript variant 1, mRNA. /// Homo sapiens podocalyxin-like (PODXL), transcript variant 2, mRNA.                                                                                                                                     | podocalyxin-like                  | 0.001142<br>461 | 1.219198<br>904      |
| HEPH  | hephaestin isoform b<br>gene:ENSG00000089472 /// hephaestin isoform a<br>gene:ENSG00000089472 /// hephaestin isoform b<br>gene:ENSG00000089472 /// hephaestin isoform a<br>gene:ENSG00000089472 /// Homo sapiens clone DNA104875 HEPH (UNQ2562) mRNA, complete cds. /// Homo sapiens hephaestin (HEPH), transcript variant 3, mRNA. /// Homo sapiens hephaestin (HEPH), transcript variant 1, mRNA. /// Homo sapiens hephaestin (HEPH), transcript variant 2, mRNA. | hephaestin                        | 0.003484<br>698 | -<br>1.159984<br>964 |

|                            |                                                                                                                                                                                                                                                                                                                                                                                                                                                                                       |                                                                                     |                   |                      |
|----------------------------|---------------------------------------------------------------------------------------------------------------------------------------------------------------------------------------------------------------------------------------------------------------------------------------------------------------------------------------------------------------------------------------------------------------------------------------------------------------------------------------|-------------------------------------------------------------------------------------|-------------------|----------------------|
| SLC11A2                    | Isoform 2 of Natural resistance-associated macrophage protein 2 gene:ENSG00000110911 /// Isoform 1 of Natural resistance-associated macrophage protein 2 gene:ENSG00000110911 /// Divalent metal transporter gene:ENSG00000110911 /// Homo sapiens cDNA FLJ46799 fis, clone TRACH3031678, highly similar to Natural resistance-associated macrophage protein 2. /// Homo sapiens solute carrier family 11 (proton-coupled divalent metal ion transporters), member 2 (SLC11A2), mRNA. | solute carrier family 11 (proton-coupled divalent metal ion transporters), member 2 | 0.001989<br>436   | 1.200926<br>252      |
| SLC9A1                     | Solute carrier family 9 (Sodium/hydrogen exchanger), member 1 gene:ENSG00000090020 /// Isoform 1 of Sodium/hydrogen exchanger 1 gene:ENSG00000090020 /// Isoform 2 of Sodium/hydrogen exchanger 1 gene:ENSG00000090020 /// Human Na/H antiporter (APNH1) mRNA, complete cds. /// Homo sapiens solute carrier family 9 (sodium/hydrogen exchanger), member 1 (SLC9A1), mRNA.                                                                                                           | solute carrier family 9 (sodium/hydrogen exchanger), member 1                       | 0.001554<br>104   | -<br>1.242202<br>257 |
| SLC24A6                    | Isoform 1 of Sodium/potassium/calcium exchanger 6 gene:ENSG00000089060 /// Isoform 2 of Sodium/potassium/calcium exchanger 6 gene:ENSG00000089060 /// Homo sapiens solute carrier family 24 (sodium/potassium/calcium exchanger), member 6, mRNA (cDNA clone MGC:120605 IMAGE:40026360), complete cds. /// Homo sapiens solute carrier family 24 (sodium/potassium/calcium exchanger), member 6 (SLC24A6), mRNA.                                                                      | solute carrier family 24 (sodium/potassium/calcium exchanger), member 6             | 0.008297<br>168   | -<br>1.172206<br>281 |
| <b>Functional Group 48</b> | <b>Transcript Description</b>                                                                                                                                                                                                                                                                                                                                                                                                                                                         | <b>Gene Title</b>                                                                   | <b>Bayes.In p</b> | <b>Fold</b>          |

|          |                                                                                                                                                                                                                                                                                                                                                                                                                                                                                                                                        |                                                                                                                |                         |                         |
|----------|----------------------------------------------------------------------------------------------------------------------------------------------------------------------------------------------------------------------------------------------------------------------------------------------------------------------------------------------------------------------------------------------------------------------------------------------------------------------------------------------------------------------------------------|----------------------------------------------------------------------------------------------------------------|-------------------------|-------------------------|
| SLC1A1   | <p>Excitatory amino acid transporter 3<br/> gene:ENSG00000106688 /// Solute carrier family 1 (Neuronal/epithelial high affinity glutamate transporter, system Xag), member 1<br/> gene:ENSG00000106688 /// Homo sapiens solute carrier family 1 (neuronal/epithelial high affinity glutamate transporter, system Xag), member 1, mRNA (cDNA clone MGC:33786 IMAGE:5261168), complete cds. /// Homo sapiens solute carrier family 1 (neuronal/epithelial high affinity glutamate transporter, system Xag), member 1 (SLC1A1), mRNA.</p> | <p>solute carrier family 1 (neuronal/epithelial high affinity glutamate transporter, system Xag), member 1</p> | <p>0.000392<br/>958</p> | <p>1.343599<br/>293</p> |
| SLC25A12 | <p>cDNA FLJ33752 fis, clone BRCAN2000364, highly similar to Calcium-binding mitochondrial carrier protein Aralar1<br/> gene:ENSG00000115840 /// Calcium-binding mitochondrial carrier protein Aralar1 gene:ENSG00000115840 /// Homo sapiens mRNA for mitochondrial aspartate-glutamate carrier protein (SLC25A12 gene). /// Homo sapiens solute carrier family 25 (mitochondrial carrier, Aralar), member 12 (SLC25A12), nuclear gene encoding mitochondrial protein, mRNA.</p>                                                        | <p>solute carrier family 25 (mitochondrial carrier, Aralar), member 12</p>                                     | <p>0.007177<br/>625</p> | <p>1.196424<br/>029</p> |

|                            |                                                                                                                                                                                                                                                                                                                                                                                                                                                                                                                                                                                                                                                                                                                                  |                                                                                   |                   |              |
|----------------------------|----------------------------------------------------------------------------------------------------------------------------------------------------------------------------------------------------------------------------------------------------------------------------------------------------------------------------------------------------------------------------------------------------------------------------------------------------------------------------------------------------------------------------------------------------------------------------------------------------------------------------------------------------------------------------------------------------------------------------------|-----------------------------------------------------------------------------------|-------------------|--------------|
| SLC7A8                     | Integral membrane protein E16H<br>gene:ENSG00000092068 /// Putative uncharacterized protein (Fragment)<br>gene:ENSG00000092068 /// solute carrier family 7 (cationic amino acid transporter, y+ system), member 8 isoform b<br>gene:ENSG00000092068 /// Large neutral amino acids transporter small subunit 2<br>gene:ENSG00000092068 /// TA1<br>gene:ENSG00000092068 /// Homo sapiens hLAT2 mRNA for L-type amino acid transporter 2, complete cds. /// Homo sapiens solute carrier family 7 (cationic amino acid transporter, y+ system), member 8 (SLC7A8), transcript variant 1, mRNA. /// Homo sapiens solute carrier family 7 (cationic amino acid transporter, y+ system), member 8 (SLC7A8), transcript variant 2, mRNA. | solute carrier family 7 (cationic amino acid transporter, y+ system), member 8    | 5.26602E-05       | -1.276203738 |
| SLC7A14                    | Homo sapiens solute carrier family 7 (cationic amino acid transporter, y+ system), member 14 (SLC7A14), mRNA.                                                                                                                                                                                                                                                                                                                                                                                                                                                                                                                                                                                                                    | solute carrier family 7 (cationic amino acid transporter, y+ system), member 14   | 0.724825055       | -1.037307393 |
| SLC25A15                   | Mitochondrial ornithine transporter 1<br>gene:ENSG00000102743 /// Solute carrier family 25 (Mitochondrial carrier<br>gene:ENSG00000102743 /// Homo sapiens ornithine transporter (ORNT1) mRNA, complete cds; nuclear gene for mitochondrial product. /// Homo sapiens solute carrier family 25 (mitochondrial carrier; ornithine transporter) member 15 (SLC25A15), nuclear gene encoding mitochondrial protein, mRNA.                                                                                                                                                                                                                                                                                                           | solute carrier family 25 (mitochondrial carrier; ornithine transporter) member 15 | 0.00683359        | 1.178797763  |
| <b>Functional Group 49</b> | <b>Transcript Description</b>                                                                                                                                                                                                                                                                                                                                                                                                                                                                                                                                                                                                                                                                                                    | <b>Gene Title</b>                                                                 | <b>Bayes.In p</b> | <b>Fold</b>  |

|        |                                                                                                                                                                                                                                                                                                                                                                                                                                                                                                                                                                          |                                                              |                 |                      |
|--------|--------------------------------------------------------------------------------------------------------------------------------------------------------------------------------------------------------------------------------------------------------------------------------------------------------------------------------------------------------------------------------------------------------------------------------------------------------------------------------------------------------------------------------------------------------------------------|--------------------------------------------------------------|-----------------|----------------------|
| BCS1L  | Mitochondrial chaperone BCS1<br>gene:ENSG00000074582 ///<br>Mitochondrial chaperone BCS1<br>gene:ENSG00000074582 ///<br>Mitochondrial chaperone BCS1<br>gene:ENSG00000074582 ///<br>Mitochondrial chaperone BCS1<br>gene:ENSG00000074582 /// Homo<br>sapiens cDNA FLJ38891 fis, clone<br>NHNPC2000062, highly similar to<br>Mitochondrial chaperone BCS1. ///<br>Homo sapiens BCS1-like (yeast)<br>(BCS1L), transcript variant 1, mRNA.<br>/// Homo sapiens BCS1-like (yeast)<br>(BCS1L), nuclear gene encoding<br>mitochondrial protein, transcript<br>variant 2, mRNA. | BCS1-like (yeast)                                            | 0.006166<br>574 | 1.209016<br>657      |
| ABCB1  | Multidrug resistance protein 1<br>gene:ENSG00000085563 /// P-<br>glycoprotein 1 (Fragment)<br>gene:ENSG00000085563 /// Homo<br>sapiens P-glycoprotein (PGY1) mRNA,<br>complete cds. /// Homo sapiens ATP-<br>binding cassette, sub-family B<br>(MDR/TAP), member 1 (ABCB1),<br>mRNA.                                                                                                                                                                                                                                                                                     | ATP-binding cassette,<br>sub-family B<br>(MDR/TAP), member 1 | 0.000687<br>05  | -<br>1.506968<br>833 |
| ABCA12 | Isoform 1 of ATP-binding cassette<br>sub-family A member 12<br>gene:ENSG00000144452 /// Isoform<br>2 of ATP-binding cassette sub-family<br>A member 12<br>gene:ENSG00000144452 /// Homo<br>sapiens ABCA12 transporter<br>subfamily A mRNA, complete cds. ///<br>Homo sapiens ATP-binding cassette,<br>sub-family A (ABC1), member 12<br>(ABCA12), transcript variant 2, mRNA.<br>/// Homo sapiens ATP-binding<br>cassette, sub-family A (ABC1),<br>member 12 (ABCA12), transcript<br>variant 1, mRNA.                                                                    | ATP-binding cassette,<br>sub-family A (ABC1),<br>member 12   | 1.23056E<br>-05 | -<br>1.767430<br>322 |

|                            |                                                                                                                                                                                                                                                                                                       |                                                                                 |                   |                      |
|----------------------------|-------------------------------------------------------------------------------------------------------------------------------------------------------------------------------------------------------------------------------------------------------------------------------------------------------|---------------------------------------------------------------------------------|-------------------|----------------------|
| KATNAL2                    | 40 kDa protein<br>gene:ENSG00000167216 /// Isoform 2 of Katanin p60 ATPase-containing subunit A-like 2<br>gene:ENSG00000167216 /// Homo sapiens katanin p60 subunit A-like 2, mRNA (cDNA clone MGC:33211 IMAGE:4829800), complete cds. /// Homo sapiens katanin p60 subunit A-like 2 (KATNAL2), mRNA. | katanin p60 subunit A-like 2                                                    | 0.006896<br>265   | -<br>1.186175<br>082 |
| <b>Functional Group 50</b> | <b>Transcript Description</b>                                                                                                                                                                                                                                                                         | <b>Gene Title</b>                                                               | <b>Bayes.In p</b> | <b>Fold</b>          |
| DNAJC15                    | DnaJ homolog subfamily C member 15 gene:ENSG00000120675 /// Homo sapiens DnaJ (Hsp40) homolog, subfamily C, member 15, mRNA (cDNA clone MGC:110875 IMAGE:30530999), complete cds. /// Homo sapiens DnaJ (Hsp40) homolog, subfamily C, member 15 (DNAJC15), mRNA.                                      | DnaJ (Hsp40) homolog, subfamily C, member 15                                    | 0.002111<br>086   | 1.248706<br>673      |
| TXNDC15                    | Isoform 1 of Thioredoxin domain-containing protein 15<br>gene:ENSG00000113621 /// Homo sapiens mRNA; cDNA DKFZp686L0872 (from clone DKFZp686L0872). /// Homo sapiens thioredoxin domain containing 15 (TXNDC15), mRNA.                                                                                | thioredoxin domain containing 15                                                | 0.009044<br>932   | 1.164926<br>261      |
| REEP5                      | Receptor expression-enhancing protein 5 gene:ENSG00000129625 /// 21 kDa protein<br>gene:ENSG00000129625 /// Homo sapiens receptor accessory protein 5, mRNA (cDNA clone MGC:2267 IMAGE:3350749), complete cds. /// Homo sapiens receptor accessory protein 5 (REEP5), mRNA.                           | receptor accessory protein 5                                                    | 0.002075<br>343   | 1.179950<br>903      |
| SLC7A14                    | Homo sapiens solute carrier family 7 (cationic amino acid transporter, y+ system), member 14 (SLC7A14), mRNA.                                                                                                                                                                                         | solute carrier family 7 (cationic amino acid transporter, y+ system), member 14 | 0.724825<br>055   | -<br>1.037307<br>393 |

|         |                                                                                                                                                                                                                                                                                                                                                                                                                                                           |                                                              |             |              |
|---------|-----------------------------------------------------------------------------------------------------------------------------------------------------------------------------------------------------------------------------------------------------------------------------------------------------------------------------------------------------------------------------------------------------------------------------------------------------------|--------------------------------------------------------------|-------------|--------------|
| DCBLD2  | Isoform 1 of Discoidin, CUB and LCCL domain-containing protein 2 gene:ENSG00000057019 /// Isoform 2 of Discoidin, CUB and LCCL domain-containing protein 2 gene:ENSG00000057019 /// 42 kDa protein gene:ENSG00000057019 /// Homo sapiens mRNA for CLCP1, complete cds. /// Homo sapiens discoidin, CUB and LCCL domain containing 2 (DCBLD2), mRNA.                                                                                                       | discoidin, CUB and LCCL domain containing 2                  | 0.004394744 | -1.154840632 |
| TNFRSF9 | Tumor necrosis factor receptor superfamily member 9 gene:ENSG00000049249 /// Human activation dependent T cell mRNA, complete cds. /// Homo sapiens tumor necrosis factor receptor superfamily, member 9 (TNFRSF9), mRNA.                                                                                                                                                                                                                                 | tumor necrosis factor receptor superfamily, member 9         | 3.28208E-06 | -1.98832707  |
| GPR172A | Porcine endogenous retrovirus A receptor 1 gene:ENSG00000185803 /// Porcine endogenous retrovirus A receptor 1 gene:ENSG00000185803 /// Homo sapiens cDNA FLJ11856 fis, clone HEMBA1006789. /// Homo sapiens G protein-coupled receptor 172A (GPR172A), mRNA.                                                                                                                                                                                             | G protein-coupled receptor 172A                              | 0.002766543 | 1.174820046  |
| PITPNM2 | Isoform 1 of Membrane-associated phosphatidylinositol transfer protein 2 gene:ENSG00000090975 /// Isoform 2 of Membrane-associated phosphatidylinositol transfer protein 2 gene:ENSG00000090975 /// Isoform 3 of Membrane-associated phosphatidylinositol transfer protein 2 gene:ENSG00000090975 /// Homo sapiens mRNA for KIAA1457 protein, partial cds. /// Homo sapiens phosphatidylinositol transfer protein, membrane-associated 2 (PITPNM2), mRNA. | phosphatidylinositol transfer protein, membrane-associated 2 | 0.005935749 | -1.244589029 |

|         |                                                                                                                                                                                                                                                                                                                                                                                                                                                                                                                                                              |                           |               |                      |
|---------|--------------------------------------------------------------------------------------------------------------------------------------------------------------------------------------------------------------------------------------------------------------------------------------------------------------------------------------------------------------------------------------------------------------------------------------------------------------------------------------------------------------------------------------------------------------|---------------------------|---------------|----------------------|
| TMEM30A | Isoform 1 of Cell cycle control protein 50A gene:ENSG00000112697 /// Isoform 2 of Cell cycle control protein 50A gene:ENSG00000112697 /// Homo sapiens cDNA FLJ53706 complete cds, highly similar to Cell cycle control protein 50A. /// Homo sapiens transmembrane protein 30A (TMEM30A), mRNA.                                                                                                                                                                                                                                                             | transmembrane protein 30A | 0.002151<br>2 | -<br>1.160884<br>08  |
| FRMD5   | Putative uncharacterized protein FRMD5 gene:ENSG00000171877 /// Isoform 1 of FERM domain-containing protein 5 gene:ENSG00000171877 /// Homo sapiens cDNA FLJ33253 fis, clone ASTRO2005343, weakly similar to BAND 4.1-LIKE PROTEIN 4. /// Homo sapiens FERM domain containing 5 (FRMD5), transcript variant 2, mRNA.                                                                                                                                                                                                                                         | FERM domain containing 5  | 0.000861<br>2 | -<br>1.256314<br>411 |
| LETMD1  | cDNA FLJ45633 fis, clone CHONS2002419, highly similar to Homo sapiens LETM1 domain containing 1 (LETMD1), transcript variant 1, mRNA gene:ENSG00000050426 /// Isoform 3 of LETM1 domain-containing protein 1 gene:ENSG00000050426 /// Isoform 6 of LETM1 domain-containing protein 1 gene:ENSG00000050426 /// Homo sapiens cervical cancer 1 protooncogene protein p40 mRNA, complete cds. /// Homo sapiens LETM1 domain containing 1 (LETMD1), transcript variant 1, mRNA. /// Homo sapiens LETM1 domain containing 1 (LETMD1), transcript variant 2, mRNA. | LETM1 domain containing 1 | 0.001773<br>7 | 1.263994<br>996      |



|         |                                                                                                                                                                                                                                                                                                                                                                                                       |                                                               |                 |                      |
|---------|-------------------------------------------------------------------------------------------------------------------------------------------------------------------------------------------------------------------------------------------------------------------------------------------------------------------------------------------------------------------------------------------------------|---------------------------------------------------------------|-----------------|----------------------|
| PODXL   | Podocalyxin-like protein 1<br>gene:ENSG00000128567 ///<br>podocalyxin-like isoform 1 precursor<br>gene:ENSG00000128567 /// Homo<br>sapiens podocalyxin-like protein<br>mRNA, complete cds. /// Homo<br>sapiens podocalyxin-like (PODXL),<br>transcript variant 1, mRNA. /// Homo<br>sapiens podocalyxin-like (PODXL),<br>transcript variant 2, mRNA.                                                  | podocalyxin-like                                              | 0.001142<br>461 | 1.219198<br>904      |
| SCAMP2  | Secretory carrier-associated<br>membrane protein 2<br>gene:ENSG00000140497 /// Homo<br>sapiens cDNA FLJ39475 fis, clone<br>PROST2013121, highly similar to<br>SECRETORY CARRIER-ASSOCIATED<br>MEMBRANE PROTEIN 2. /// Homo<br>sapiens secretory carrier membrane<br>protein 2 (SCAMP2), mRNA.                                                                                                         | secretory carrier<br>membrane protein 2                       | 0.001183<br>903 | 1.201401<br>381      |
| CNIH    | Putative uncharacterized protein<br>CNIH gene:ENSG00000100528 ///<br>Protein cornichon homolog<br>gene:ENSG00000100528 /// Homo<br>sapiens cornichon mRNA, complete<br>cds. /// Homo sapiens cornichon<br>homolog (Drosophila) (CNIH), mRNA.                                                                                                                                                          | cornichon homolog<br>(Drosophila)                             | 0.004930<br>261 | 1.175375<br>923      |
| CNIH3   | Protein cornichon homolog 3<br>gene:ENSG00000143786 /// Homo<br>sapiens cornichon homolog 3<br>(Drosophila), mRNA (cDNA clone<br>MGC:9297 IMAGE:3894832),<br>complete cds. /// Homo sapiens<br>cornichon homolog 3 (Drosophila)<br>(CNIH3), mRNA.                                                                                                                                                     | cornichon homolog 3<br>(Drosophila)                           | 0.003939<br>682 | -<br>1.241647<br>88  |
| SLC46A1 | Isoform 1 of Proton-coupled folate<br>transporter gene:ENSG00000076351<br>/// Isoform 2 of Proton-coupled folate<br>transporter gene:ENSG00000076351<br>/// Homo sapiens solute carrier family<br>46 (folate transporter), member 1,<br>mRNA (cDNA clone MGC:9564<br>IMAGE:3872267), complete cds. ///<br>Homo sapiens solute carrier family 46<br>(folate transporter), member 1<br>(SLC46A1), mRNA. | solute carrier family 46<br>(folate transporter),<br>member 1 | 0.000986<br>004 | -<br>1.222343<br>379 |

|        |                                                                                                                                                                                                                                                                                                                                                                                                                                                                                                                                                                                                                                                                                                                                                                                                             |                                                   |             |              |
|--------|-------------------------------------------------------------------------------------------------------------------------------------------------------------------------------------------------------------------------------------------------------------------------------------------------------------------------------------------------------------------------------------------------------------------------------------------------------------------------------------------------------------------------------------------------------------------------------------------------------------------------------------------------------------------------------------------------------------------------------------------------------------------------------------------------------------|---------------------------------------------------|-------------|--------------|
| MFSD3  | Major facilitator superfamily domain-containing protein 3<br>gene:ENSG00000167700 /// Homo sapiens major facilitator superfamily domain containing 3, mRNA (cDNA clone MGC:9810 IMAGE:3860434), complete cds. /// Homo sapiens major facilitator superfamily domain containing 3 (MFSD3), mRNA.                                                                                                                                                                                                                                                                                                                                                                                                                                                                                                             | major facilitator superfamily domain containing 3 | 1.64025E-05 | 1.337808249  |
| LRRTM4 | cdna:known<br>chromosome:NCBI36:2:76828353:77602973:-1 gene:ENSG00000176204 ///<br>cdna:known<br>chromosome:NCBI36:2:76829187:77602907:-1 gene:ENSG00000176204 ///<br>cdna:known<br>chromosome:NCBI36:2:76829192:77603002:-1 gene:ENSG00000176204 ///<br>Isoform 1 of Leucine-rich repeat transmembrane neuronal protein 4<br>gene:ENSG00000176204 ///<br>cdna:known<br>chromosome:NCBI36:2:77597302:77603010:-1 gene:ENSG00000176204 ///<br>cdna:known<br>chromosome:NCBI36:2:77598150:77602844:-1 gene:ENSG00000176204 ///<br>Homo sapiens clone DNA142392 GFHL3075 (UNQ3075) mRNA, complete cds. /// Homo sapiens leucine rich repeat transmembrane neuronal 4 (LRRTM4), transcript variant 1, mRNA. /// Homo sapiens leucine rich repeat transmembrane neuronal 4 (LRRTM4), transcript variant 2, mRNA. | leucine rich repeat transmembrane neuronal 4      | 0.00327488  | -1.221016835 |
| LAYN   | Isoform 2 of Layilin<br>gene:ENSG00000204381 /// Isoform 1 of Layilin gene:ENSG00000204381 /// Homo sapiens cDNA FLJ30977 fis, clone HHDPC2000095, highly similar to Cricetulus griseus layilin mRNA. /// Homo sapiens layilin (LAYN), mRNA.                                                                                                                                                                                                                                                                                                                                                                                                                                                                                                                                                                | layilin                                           | 0.00662727  | -1.230555767 |

|          |                                                                                                                                                                                                                                                                                                                                                                                                        |                                                                  |                 |                      |
|----------|--------------------------------------------------------------------------------------------------------------------------------------------------------------------------------------------------------------------------------------------------------------------------------------------------------------------------------------------------------------------------------------------------------|------------------------------------------------------------------|-----------------|----------------------|
| IMPAD1   | Homo sapiens inositol monophosphatase domain containing 1 (IMPAD1), mRNA.                                                                                                                                                                                                                                                                                                                              | inositol monophosphatase domain containing 1                     | 0.314382<br>425 | 1.135431<br>175      |
| GRAMD1B  | cDNA FLJ45549 fis, clone BRTHA2036295<br>gene:ENSG00000023171 /// Homo sapiens cDNA FLJ45549 fis, clone BRTHA2036295. /// Homo sapiens GRAM domain containing 1B (GRAMD1B), mRNA.                                                                                                                                                                                                                      | GRAM domain containing 1B                                        | 0.008827<br>007 | 1.234069<br>336      |
| ASAM     | Adipocyte adhesion molecule<br>gene:ENSG00000166250 /// Uncharacterized protein ENSP000000376525 (Fragment)<br>gene:ENSG00000166250 /// Homo sapiens adipocyte adhesion molecule mRNA, complete cds. /// Homo sapiens adipocyte-specific adhesion molecule (ASAM), mRNA.                                                                                                                               | adipocyte-specific adhesion molecule                             | 0.004035<br>831 | 1.172514<br>888      |
| TOR1AIP2 | Torsin-1A-interacting protein 2<br>gene:ENSG00000169905 /// IFRG15 protein gene:ENSG00000218839 /// Homo sapiens cDNA FLJ77012 complete cds, highly similar to Homo sapiens interferon responsive gene 15 (IFRG15), mRNA. /// Homo sapiens torsin A interacting protein 2, mRNA (cDNA clone MGC:126581 IMAGE:8069038), complete cds. /// Homo sapiens torsin A interacting protein 2 (TOR1AIP2), mRNA. | interferon responsive gene 15 /// torsin A interacting protein 2 | 0.001893<br>375 | -<br>1.192769<br>275 |
| IER3IP1  | Homo sapiens PRO2309 mRNA, complete cds.                                                                                                                                                                                                                                                                                                                                                               | immediate early response 3 interacting protein 1                 | 0.416335<br>366 | -<br>1.125829<br>568 |
| TCTN2    | Tectonic-2 gene:ENSG00000168778 /// Homo sapiens TECT2 (TECT2) mRNA, complete cds. /// Homo sapiens tectonic family member 2 (TCTN2), mRNA.                                                                                                                                                                                                                                                            | tectonic family member 2                                         | 0.003700<br>585 | 1.224374<br>462      |

|        |                                                                                                                                                                                                                                                                                                                                                                                                                                                                                                                                                     |                                       |                 |                      |
|--------|-----------------------------------------------------------------------------------------------------------------------------------------------------------------------------------------------------------------------------------------------------------------------------------------------------------------------------------------------------------------------------------------------------------------------------------------------------------------------------------------------------------------------------------------------------|---------------------------------------|-----------------|----------------------|
| EMP3   | Epithelial membrane protein 3<br>gene:ENSG00000142227 /// Homo sapiens epithelial membrane protein 3, mRNA (cDNA clone MGC:9511 IMAGE:3891050), complete cds. /// Homo sapiens epithelial membrane protein 3 (EMP3), mRNA.                                                                                                                                                                                                                                                                                                                          | epithelial membrane protein 3         | 0.006650<br>587 | 1.189978<br>91       |
| CD99   | Isoform I of CD99 antigen<br>gene:ENSG00000002586 /// Putative uncharacterized protein CD99<br>gene:ENSG00000002586 /// CD99 antigen isoform b precursor<br>gene:ENSG00000002586 /// Putative uncharacterized protein CD99<br>gene:ENSG00000002586 /// Putative uncharacterized protein CD99<br>gene:ENSG00000002586 /// Homo sapiens CD99 molecule, mRNA (cDNA clone MGC:19734 IMAGE:3606974), complete cds. /// Homo sapiens CD99 molecule (CD99), transcript variant 1, mRNA. /// Homo sapiens CD99 molecule (CD99), transcript variant 2, mRNA. | CD99 molecule                         | 0.004074<br>288 | 1.190899<br>882      |
| PPAP2C | phosphatidic acid phosphatase type 2C isoform 3<br>gene:ENSG00000141934 /// Lipid phosphate phosphohydrolase 2<br>gene:ENSG00000141934 /// Homo sapiens phosphatidic acid phosphatase type 2C, mRNA (cDNA clone MGC:3813 IMAGE:3659728), complete cds. /// Homo sapiens phosphatidic acid phosphatase type 2C (PPAP2C), transcript variant 2, mRNA. /// Homo sapiens phosphatidic acid phosphatase type 2C (PPAP2C), transcript variant 1, mRNA. /// Homo sapiens phosphatidic acid phosphatase type 2C (PPAP2C), transcript variant 3, mRNA.       | phosphatidic acid phosphatase type 2C | 0.001639<br>994 | -<br>1.198286<br>466 |

|         |                                                                                                                                                                                                                                                                                                                                                                                                                                                                                                                                                                                                                                                                                                                                                                                                 |                                    |             |              |
|---------|-------------------------------------------------------------------------------------------------------------------------------------------------------------------------------------------------------------------------------------------------------------------------------------------------------------------------------------------------------------------------------------------------------------------------------------------------------------------------------------------------------------------------------------------------------------------------------------------------------------------------------------------------------------------------------------------------------------------------------------------------------------------------------------------------|------------------------------------|-------------|--------------|
| MPZL1   | Isoform 3 of Myelin protein zero-like protein 1 gene:ENSG00000197965 /// Isoform 1 of Myelin protein zero-like protein 1 gene:ENSG00000197965 /// Myelin protein zero-like 1 gene:ENSG00000197965 /// Isoform 3 of Myelin protein zero-like protein 1 gene:ENSG00000197965 /// Homo sapiens clone DNA76510 MPZL1 (UNQ849) mRNA, complete cds. /// Homo sapiens myelin protein zero-like 1 (MPZL1), transcript variant 1, mRNA. /// Homo sapiens myelin protein zero-like 1 (MPZL1), transcript variant 2, mRNA.                                                                                                                                                                                                                                                                                 | myelin protein zero-like 1         | 0.003136446 | 1.168400169  |
| GLIPR1  | Glioma pathogenesis-related protein 1 gene:ENSG00000139278 /// Homo sapiens GLI pathogenesis-related 1, mRNA (cDNA clone MGC:21203 IMAGE:4453841), complete cds. /// Homo sapiens GLI pathogenesis-related 1 (GLIPR1), mRNA.                                                                                                                                                                                                                                                                                                                                                                                                                                                                                                                                                                    | GLI pathogenesis-related 1         | 0.001216405 | -1.219278501 |
| C1orf43 | Isoform 2 of Uncharacterized protein C1orf43 gene:ENSG00000143612 /// Isoform 4 of Uncharacterized protein C1orf43 gene:ENSG00000143612 /// Isoform 1 of Uncharacterized protein C1orf43 gene:ENSG00000143612 /// Isoform 5 of Uncharacterized protein C1orf43 gene:ENSG00000143612 /// Isoform 3 of Uncharacterized protein C1orf43 gene:ENSG00000143612 /// 18 kDa protein gene:ENSG00000143612 /// Homo sapiens chromosome 1 open reading frame 43, mRNA (cDNA clone MGC:5332 IMAGE:2901006), complete cds. /// Homo sapiens chromosome 1 open reading frame 43 (C1orf43), transcript variant 3, mRNA. /// Homo sapiens chromosome 1 open reading frame 43 (C1orf43), transcript variant 2, mRNA. /// Homo sapiens chromosome 1 open reading frame 43 (C1orf43), transcript variant 1, mRNA. | chromosome 1 open reading frame 43 | 1.23337E-05 | 1.303548616  |

|        |                                                                                                                                                                                                                                                                                                                                                                                                                                                                                                                                                                                     |                                                            |                 |                 |
|--------|-------------------------------------------------------------------------------------------------------------------------------------------------------------------------------------------------------------------------------------------------------------------------------------------------------------------------------------------------------------------------------------------------------------------------------------------------------------------------------------------------------------------------------------------------------------------------------------|------------------------------------------------------------|-----------------|-----------------|
| REEP3  | Isoform 1 of Receptor expression-enhancing protein 3<br>gene:ENSG00000165476 /// Isoform 1 of Receptor expression-enhancing protein 3 gene:ENSG00000165476 /// Homo sapiens receptor accessory protein 3, mRNA (cDNA clone MGC:87479 IMAGE:30339865), complete cds. /// Homo sapiens receptor accessory protein 3 (REEP3), mRNA.                                                                                                                                                                                                                                                    | receptor accessory protein 3                               | 0.001551<br>293 | 1.229753<br>274 |
| SMCR7L | Putative uncharacterized protein DKFZp434F0116<br>gene:ENSG00000100335 /// Smith-Magenis syndrome chromosome region candidate gene 7 protein-like gene:ENSG00000100335 /// Putative uncharacterized protein DKFZp434F0116<br>gene:ENSG00000100335 /// Smith-Magenis syndrome chromosome region candidate gene 7 protein-like gene:ENSG00000100335 /// Homo sapiens Smith-Magenis syndrome chromosome region, candidate 7-like, mRNA (cDNA clone MGC:15774 IMAGE:3502711), complete cds. /// Homo sapiens Smith-Magenis syndrome chromosome region, candidate 7-like (SMCR7L), mRNA. | Smith-Magenis syndrome chromosome region, candidate 7-like | 0.003381<br>395 | 1.214924<br>348 |
| RNF170 | Isoform 3 of RING finger protein 170<br>gene:ENSG00000120925 /// 37 kDa protein gene:ENSG00000120925 /// Isoform 4 of RING finger protein 170<br>gene:ENSG00000120925 /// Isoform 1 of RING finger protein 170<br>gene:ENSG00000120925 /// Homo sapiens cDNA FLJ33545 fis, clone BRAMY2008382. /// Homo sapiens ring finger protein 170 (RNF170), mRNA.                                                                                                                                                                                                                             | ring finger protein 170                                    | 0.003313<br>338 | 1.229727<br>891 |

|                  |                                                                                                                                                                                                                                                                                                                                                                                                                                                                                                                                                                                                                                                                                                                                                                                                                                                                                                                                                                                                                                                                                                                                                                                                                                                                                                                                                                                                                                                                                                                                                                                                                                                                                               |                                                                                                                                                        |                          |                                 |
|------------------|-----------------------------------------------------------------------------------------------------------------------------------------------------------------------------------------------------------------------------------------------------------------------------------------------------------------------------------------------------------------------------------------------------------------------------------------------------------------------------------------------------------------------------------------------------------------------------------------------------------------------------------------------------------------------------------------------------------------------------------------------------------------------------------------------------------------------------------------------------------------------------------------------------------------------------------------------------------------------------------------------------------------------------------------------------------------------------------------------------------------------------------------------------------------------------------------------------------------------------------------------------------------------------------------------------------------------------------------------------------------------------------------------------------------------------------------------------------------------------------------------------------------------------------------------------------------------------------------------------------------------------------------------------------------------------------------------|--------------------------------------------------------------------------------------------------------------------------------------------------------|--------------------------|---------------------------------|
| <p>LOC399491</p> | <p>cdna:known<br/> chromosome:NCBI36:16:14713047:14<br/> 727651:1 gene:ENSG00000069651 ///<br/> Putative uncharacterized protein A-<br/> 589H1.1 gene:ENSG00000069651 ///<br/> Nuclear pore complex-interacting<br/> protein gene:ENSG00000185208 ///<br/> Putative uncharacterized protein A-<br/> 589H1.1 gene:ENSG00000185208 ///<br/> cdna:known<br/> chromosome:NCBI36:16:14924160:14<br/> 953402:1 gene:ENSG00000183793 ///<br/> nuclear pore complex interacting<br/> protein gene:ENSG00000183426 ///<br/> Putative uncharacterized protein<br/> ENSP00000349390 (Fragment)<br/> gene:ENSG00000188599 /// Isoform<br/> 1 of GPS, PLAT and transmembrane<br/> domain-containing protein FLJ00285<br/> gene:ENSG00000188599 ///<br/> cdna:known<br/> chromosome:NCBI36:16:15365326:15<br/> 371268:-1 gene:ENSG00000196908<br/> /// Uncharacterized protein<br/> ENSP00000345016<br/> gene:ENSG00000214967 /// cDNA<br/> FLJ44848 fis, clone BRACE3051621,<br/> highly similar to Polycystin<br/> gene:ENSG00000183458 /// cDNA<br/> FLJ42525 fis, clone BRACE3001391,<br/> highly similar to Polycystin<br/> gene:ENSG00000183458 ///<br/> Uncharacterized protein<br/> ENSP00000345016<br/> gene:ENSG00000205746 /// NPIP-like<br/> protein LOC440350<br/> gene:ENSG00000196877 /// NPIP-like<br/> protein LOC440350<br/> gene:ENSG00000198156 ///<br/> cdna:known<br/> chromosome:NCBI36:16:28957477:28<br/> 970549:1 gene:ENSG00000196161 ///<br/> Homo sapiens mRNA for FLJ00285<br/> protein. /// Homo sapiens mRNA for<br/> FLJ00322 protein. /// Homo sapiens<br/> nuclear pore complex interacting<br/> protein (NPIP), mRNA. /// Homo<br/> sapiens similar to nuclear pore</p> | <p>LOC399491 protein ///<br/> nuclear pore complex<br/> interacting protein ///<br/> similar to nuclear pore<br/> complex interacting<br/> protein</p> | <p>0.028871<br/> 971</p> | <p>-<br/> 1.112605<br/> 265</p> |
|------------------|-----------------------------------------------------------------------------------------------------------------------------------------------------------------------------------------------------------------------------------------------------------------------------------------------------------------------------------------------------------------------------------------------------------------------------------------------------------------------------------------------------------------------------------------------------------------------------------------------------------------------------------------------------------------------------------------------------------------------------------------------------------------------------------------------------------------------------------------------------------------------------------------------------------------------------------------------------------------------------------------------------------------------------------------------------------------------------------------------------------------------------------------------------------------------------------------------------------------------------------------------------------------------------------------------------------------------------------------------------------------------------------------------------------------------------------------------------------------------------------------------------------------------------------------------------------------------------------------------------------------------------------------------------------------------------------------------|--------------------------------------------------------------------------------------------------------------------------------------------------------|--------------------------|---------------------------------|

|          |                                                                                                                                                                                                                                       |                                 |                 |                 |
|----------|---------------------------------------------------------------------------------------------------------------------------------------------------------------------------------------------------------------------------------------|---------------------------------|-----------------|-----------------|
|          | complex interacting protein (LOC440350), mRNA.                                                                                                                                                                                        |                                 |                 |                 |
| ARV1     | Protein ARV1<br>gene:ENSG00000173409 /// 26 kDa<br>protein gene:ENSG00000173409 ///<br>Homo sapiens ARV1 mRNA, complete<br>cds. /// Homo sapiens ARV1 homolog<br>(S. cerevisiae) (ARV1), mRNA.                                        | ARV1 homolog (S.<br>cerevisiae) | 0.000498<br>282 | 1.290297<br>236 |
| TMEM126A | Transmembrane protein 126A<br>gene:ENSG00000171202 /// Homo<br>sapiens transmembrane protein<br>126A, mRNA (cDNA clone MGC:14138<br>IMAGE:3948518), complete cds. ///<br>Homo sapiens transmembrane<br>protein 126A (TMEM126A), mRNA. | transmembrane<br>protein 126A   | 0.003177<br>148 | 1.274946<br>674 |



|               |                                                                                                                                                                                                                                                                                                                                                                                                                                                                                                                                                                                                                                  |                                                                   |                 |                      |
|---------------|----------------------------------------------------------------------------------------------------------------------------------------------------------------------------------------------------------------------------------------------------------------------------------------------------------------------------------------------------------------------------------------------------------------------------------------------------------------------------------------------------------------------------------------------------------------------------------------------------------------------------------|-------------------------------------------------------------------|-----------------|----------------------|
| NRM           | Isoform 2 of Nurim<br>gene:ENSG00000206391 /// Isoform 1 of Nurim gene:ENSG00000206391 /// Isoform 2 of Nurim gene:ENSG00000206484 /// Isoform 1 of Nurim gene:ENSG00000206484 /// Isoform 1 of Nurim gene:ENSG00000137404 /// Isoform 2 of Nurim gene:ENSG00000137404 /// Isoform 4 of Nurim gene:ENSG00000137404 /// Isoform 5 of Nurim gene:ENSG00000137404 /// Isoform 1 of Nurim gene:ENSG00000137404 /// Homo sapiens cDNA PSEC0207 fis, clone HEMBA1002981, highly similar to Homo sapiens nurim (nuclear envelope membrane protein) (NRM), mRNA. /// Homo sapiens nurim (nuclear envelope membrane protein) (NRM), mRNA. | nurim (nuclear envelope membrane protein)                         | 0.019683<br>966 | 1.162829<br>63       |
| C17orf61      | UPF0451 protein C17orf61<br>gene:ENSG00000205544 /// Homo sapiens cDNA FLJ31260 fis, clone KIDNE2005854, highly similar to Phospholipid scramblase 3. /// Homo sapiens cDNA FLJ77856 complete cds, highly similar to Homo sapiens phospholipid scramblase 3 (PLSCR3), mRNA. /// Homo sapiens chromosome 17 open reading frame 61, mRNA (cDNA clone MGC:40107 IMAGE:5418259), complete cds.                                                                                                                                                                                                                                       | phospholipid scramblase 3 /// chromosome 17 open reading frame 61 | 0.001099<br>691 | 1.276122<br>626      |
| DKFZP564O0823 | Protein PARM-1<br>gene:ENSG00000169116 /// Homo sapiens clone DNA92223 VYKT1879 (UNQ1879) mRNA, complete cds. /// Homo sapiens DKFZP564O0823 protein (DKFZP564O0823), mRNA.                                                                                                                                                                                                                                                                                                                                                                                                                                                      | DKFZP564O0823 protein                                             | 5.61324E<br>-05 | -<br>1.348721<br>612 |
| CCDC56        | Coiled-coil domain-containing protein 56 gene:ENSG00000183978 /// Homo sapiens mRNA for HSPC009 variant, clone: PNC06538. /// Homo sapiens coiled-coil domain containing 56 (CCDC56), mRNA.                                                                                                                                                                                                                                                                                                                                                                                                                                      | coiled-coil domain containing 56                                  | 0.003281<br>488 | 1.232223<br>987      |

|         |                                                                                                                                                                                                                                                                                                                                                                                                                                                                                                                                                                                             |                                                      |                 |                      |
|---------|---------------------------------------------------------------------------------------------------------------------------------------------------------------------------------------------------------------------------------------------------------------------------------------------------------------------------------------------------------------------------------------------------------------------------------------------------------------------------------------------------------------------------------------------------------------------------------------------|------------------------------------------------------|-----------------|----------------------|
| RPRM    | Protein reprimo<br>gene:ENSG00000177519 /// Homo sapiens reprimo, TP53 dependent G2 arrest mediator candidate, mRNA (cDNA clone MGC:11260 IMAGE:3942270), complete cds. /// Homo sapiens reprimo, TP53 dependent G2 arrest mediator candidate (RPRM), mRNA.                                                                                                                                                                                                                                                                                                                                 | reprimo, TP53 dependent G2 arrest mediator candidate | 0.005161<br>311 | 1.194146<br>899      |
| SERAC1  | Isoform 1 of Protein SERAC1<br>gene:ENSG00000122335 /// Isoform 2 of Protein SERAC1<br>gene:ENSG00000122335 /// Isoform 2 of Protein SERAC1<br>gene:ENSG00000122335 /// Homo sapiens serine active site containing 1, mRNA (cDNA clone MGC:3108 IMAGE:3350731), complete cds. /// Homo sapiens serine active site containing 1 (SERAC1), mRNA.                                                                                                                                                                                                                                              | serine active site containing 1                      | 0.008576<br>676 | 1.170782<br>982      |
| CCDC136 | Isoform 3 of Coiled-coil domain-containing protein 136<br>gene:ENSG00000128596 /// Isoform 1 of Coiled-coil domain-containing protein 136<br>gene:ENSG00000128596 /// Isoform 2 of Coiled-coil domain-containing protein 136<br>gene:ENSG00000128596 /// Putative uncharacterized protein CCDC136<br>gene:ENSG00000128596 /// Putative uncharacterized protein CCDC136 (Fragment)<br>gene:ENSG00000128596 /// Homo sapiens coiled-coil domain containing 136, mRNA (cDNA clone MGC:167819 IMAGE:8860498), complete cds. /// Homo sapiens coiled-coil domain containing 136 (CCDC136), mRNA. | coiled-coil domain containing 136                    | 0.001733<br>181 | -<br>1.317000<br>765 |
| KRTCAP3 | Isoform 1 of Keratinocytes-associated protein 3<br>gene:ENSG00000157992 /// Isoform 2 of Keratinocytes-associated protein 3<br>gene:ENSG00000157992 /// Homo sapiens keratinocytes associated protein 3 (KCP3) mRNA, complete cds. /// Homo sapiens keratinocyte associated protein 3 (KRTCAP3), mRNA.                                                                                                                                                                                                                                                                                      | keratinocyte associated protein 3                    | 0.008535<br>343 | 1.184052<br>989      |

|          |                                                                                                                                                                                                                                                                                                                                                                                                                                                                                                                                                                                              |                                              |             |              |
|----------|----------------------------------------------------------------------------------------------------------------------------------------------------------------------------------------------------------------------------------------------------------------------------------------------------------------------------------------------------------------------------------------------------------------------------------------------------------------------------------------------------------------------------------------------------------------------------------------------|----------------------------------------------|-------------|--------------|
| C7orf53  | Isoform 1 of Coiled-coil domain-containing transmembrane protein C7orf53 gene:ENSG00000181016 /// Homo sapiens chromosome 7 open reading frame 53, mRNA (cDNA clone IMAGE:4830480). /// Homo sapiens chromosome 7 open reading frame 53 (C7orf53), transcript variant 1, mRNA. /// Homo sapiens chromosome 7 open reading frame 53 (C7orf53), transcript variant 2, mRNA.                                                                                                                                                                                                                    | chromosome 7 open reading frame 53           | 0.000271813 | -1.576876768 |
| SLC44A5  | Isoform 2 of Choline transporter-like protein 5 gene:ENSG00000137968 /// Isoform 2 of Choline transporter-like protein 5 gene:ENSG00000137968 /// Isoform 1 of Choline transporter-like protein 5 gene:ENSG00000137968 /// Putative uncharacterized protein SLC44A5 gene:ENSG00000137968 /// Homo sapiens solute carrier family 44, member 5, mRNA (cDNA clone MGC:42574 IMAGE:4824861), complete cds. /// Homo sapiens solute carrier family 44, member 5 (SLC44A5), transcript variant 1, mRNA. /// Homo sapiens solute carrier family 44, member 5 (SLC44A5), transcript variant 2, mRNA. | solute carrier family 44, member 5           | 0.001243544 | -1.364925707 |
| FAM55B   | hypothetical protein LOC120406 gene:ENSG00000204361 /// Homo sapiens cDNA FLJ25224 fis, clone STM00905. /// Homo sapiens family with sequence similarity 55, member B (FAM55B), mRNA.                                                                                                                                                                                                                                                                                                                                                                                                        | family with sequence similarity 55, member B | 0.002821793 | -1.396186645 |
| C9orf123 | Isoform 2 of Transmembrane protein C9orf123 gene:ENSG00000137038 /// Homo sapiens cDNA FLJ76577 complete cds. /// Homo sapiens chromosome 9 open reading frame 123 (C9orf123), mRNA.                                                                                                                                                                                                                                                                                                                                                                                                         | chromosome 9 open reading frame 123          | 2.58832E-05 | 1.339680345  |

|          |                                                                                                                                                                                                                                                                                                                                                                                                                                                                                                                                                             |                                        |                 |                     |
|----------|-------------------------------------------------------------------------------------------------------------------------------------------------------------------------------------------------------------------------------------------------------------------------------------------------------------------------------------------------------------------------------------------------------------------------------------------------------------------------------------------------------------------------------------------------------------|----------------------------------------|-----------------|---------------------|
| MANBAL   | Protein MANBAL<br>gene:ENSG00000101363 /// Protein<br>MANBAL gene:ENSG00000101363 ///<br>Mannosidase, beta A, lysosomal-like<br>gene:ENSG00000101363 /// Protein<br>MANBAL gene:ENSG00000101363 ///<br>Protein MANBAL<br>gene:ENSG00000101363 /// Protein<br>MANBAL gene:ENSG00000101363 ///<br>Homo sapiens cDNA: FLJ23055 fis,<br>clone LNG03262. /// Homo sapiens<br>mannosidase, beta A, lysosomal-like<br>(MANBAL), transcript variant 2,<br>mRNA. /// Homo sapiens<br>mannosidase, beta A, lysosomal-like<br>(MANBAL), transcript variant 1,<br>mRNA. | mannosidase, beta A,<br>lysosomal-like | 9.61227E<br>-05 | 1.298557<br>075     |
| C12orf62 | Uncharacterized protein C12orf62<br>gene:ENSG00000178449 /// Homo<br>sapiens chromosome 12 open reading<br>frame 62, mRNA (cDNA clone<br>MGC:14288 IMAGE:4135996),<br>complete cds.                                                                                                                                                                                                                                                                                                                                                                         | chromosome 12 open<br>reading frame 62 | 3.32807E<br>-05 | 1.342134<br>616     |
| C9orf46  | Transmembrane protein C9orf46<br>gene:ENSG00000107020 /// Homo<br>sapiens uncharacterized<br>hematopoietic stem/progenitor cells<br>protein MDS030 mRNA, complete<br>cds. /// Homo sapiens AD025 mRNA,<br>complete cds.                                                                                                                                                                                                                                                                                                                                     | chromosome 9 open<br>reading frame 46  | 0.003702<br>152 | 1.261456<br>637     |
| AADACL1  | arylacetamide deacetylase-like 1<br>gene:ENSG00000144959 /// Homo<br>sapiens arylacetamide deacetylase-<br>like 1, mRNA (cDNA clone MGC:33503<br>IMAGE:4815834), complete cds. ///<br>Homo sapiens arylacetamide<br>deacetylase-like 1 (AADACL1), mRNA.                                                                                                                                                                                                                                                                                                     | arylacetamide<br>deacetylase-like 1    | 0.000709<br>716 | -<br>1.226307<br>21 |

|                                |                                                                                                                                                                                                                                                                                                                                                                                                                                                                                                             |                                        |                       |                 |
|--------------------------------|-------------------------------------------------------------------------------------------------------------------------------------------------------------------------------------------------------------------------------------------------------------------------------------------------------------------------------------------------------------------------------------------------------------------------------------------------------------------------------------------------------------|----------------------------------------|-----------------------|-----------------|
| C6orf162                       | Uncharacterized protein C6orf162<br>gene:ENSG00000111850 ///<br>Uncharacterized protein C6orf162<br>gene:ENSG00000111850 /// Homo<br>sapiens chromosome 6 open reading<br>frame 162, mRNA (cDNA clone<br>MGC:88247 IMAGE:6452586),<br>complete cds. /// Homo sapiens<br>chromosome 6 open reading frame<br>162 (C6orf162), transcript variant 2,<br>mRNA. /// Homo sapiens<br>chromosome 6 open reading frame<br>162 (C6orf162), transcript variant 1,<br>mRNA.                                             | chromosome 6 open<br>reading frame 162 | 0.003066<br>727       | 1.199326<br>745 |
| C3orf57                        | hypothetical protein<br>gene:ENSG00000179522 /// Protein<br>ADMP gene:ENSG00000196542 ///<br>Homo sapiens cDNA FLJ41354 fis,<br>clone BRAWH2014876. /// Homo<br>sapiens chromosome 3 open reading<br>frame 57 (C3orf57), mRNA.                                                                                                                                                                                                                                                                              | chromosome 3 open<br>reading frame 57  | 0.009462<br>343       | 1.282247<br>476 |
| <b>Functional<br/>Group 51</b> | <b>Transcript Description</b>                                                                                                                                                                                                                                                                                                                                                                                                                                                                               | <b>Gene Title</b>                      | <b>Bayes.In<br/>p</b> | <b>Fold</b>     |
| RAB25                          | Ras-related protein Rab-25<br>gene:ENSG00000132698 /// Homo<br>sapiens RAB25, member RAS<br>oncogene family, mRNA (cDNA clone<br>MGC:15077 IMAGE:3926839),<br>complete cds. /// Homo sapiens<br>RAB25, member RAS oncogene family<br>(RAB25), mRNA.                                                                                                                                                                                                                                                         | RAB25, member RAS<br>oncogene family   | 0.006083<br>256       | 1.177304<br>304 |
| RHEB                           | Homo sapiens ras-related GTP-<br>binding protein mRNA, complete cds.<br>/// Homo sapiens Ras family small<br>GTP binding protein RHEB2 (RHEB2)<br>mRNA, complete cds. /// Homo<br>sapiens cDNA FLJ77896 complete cds,<br>highly similar to Homo sapiens Ras<br>homolog enriched in brain (RHEB),<br>mRNA. /// Homo sapiens Ras<br>homolog enriched in brain, mRNA<br>(cDNA clone MGC:111559<br>IMAGE:6615350), complete cds. ///<br>Homo sapiens mRNA for ras-related<br>GTP-binding protein, complete cds. | Ras homolog enriched<br>in brain       | 0.010436<br>696       | 1.151146<br>911 |

|       |                                                                                                                                                                                                                                                                                                                                                                                                                                                                                                                                                |                                      |                 |                      |
|-------|------------------------------------------------------------------------------------------------------------------------------------------------------------------------------------------------------------------------------------------------------------------------------------------------------------------------------------------------------------------------------------------------------------------------------------------------------------------------------------------------------------------------------------------------|--------------------------------------|-----------------|----------------------|
| RAP1A | Ras-related protein Rap-1A<br>gene:ENSG00000116473 /// Ras-related protein Rap-1A<br>gene:ENSG00000116473 /// Homo sapiens RAP1A, member of RAS oncogene family, mRNA (cDNA clone MGC:20027 IMAGE:4422971), complete cds. /// Homo sapiens RAP1A, member of RAS oncogene family (RAP1A), transcript variant 2, mRNA. /// Homo sapiens RAP1A, member of RAS oncogene family (RAP1A), transcript variant 1, mRNA.                                                                                                                                | RAP1A, member of RAS oncogene family | 0.006983<br>909 | 1.164878<br>638      |
| RRAD  | GTP-binding protein RAD<br>gene:ENSG00000166592 /// Homo sapiens Ras-related associated with diabetes, mRNA (cDNA clone MGC:71750 IMAGE:30341066), complete cds. /// Homo sapiens Ras-related associated with diabetes (RRAD), transcript variant 2, mRNA. /// Homo sapiens Ras-related associated with diabetes (RRAD), transcript variant 1, mRNA.                                                                                                                                                                                           | Ras-related associated with diabetes | 3.74123E<br>-05 | -<br>1.560481<br>717 |
| RAB28 | Isoform S of Ras-related protein Rab-28<br>gene:ENSG00000157869 /// Isoform L of Ras-related protein Rab-28<br>gene:ENSG00000157869 /// Isoform L of Ras-related protein Rab-28<br>gene:ENSG00000157869 /// RAB28 protein<br>gene:ENSG00000157869 /// Homo sapiens RAB28, member RAS oncogene family, mRNA (cDNA clone MGC:41862 IMAGE:5263482), complete cds. /// Homo sapiens RAB28, member RAS oncogene family (RAB28), transcript variant 1, mRNA. /// Homo sapiens RAB28, member RAS oncogene family (RAB28), transcript variant 2, mRNA. | RAB28, member RAS oncogene family    | 0.005673<br>199 | 1.238421<br>919      |
| RASD1 | Dexamethasone-induced Ras-related protein 1<br>gene:ENSG00000108551 /// Homo sapiens activator of G protein signaling (AGS1) mRNA, complete cds. /// Homo sapiens RAS, dexamethasone-induced 1 (RASD1), mRNA.                                                                                                                                                                                                                                                                                                                                  | RAS, dexamethasone-induced 1         | 0.006018<br>949 | -<br>1.211124<br>367 |

|          |                                                                                                                                                                                                                                                                                                                                                                                                           |                                                                                                    |                 |                      |
|----------|-----------------------------------------------------------------------------------------------------------------------------------------------------------------------------------------------------------------------------------------------------------------------------------------------------------------------------------------------------------------------------------------------------------|----------------------------------------------------------------------------------------------------|-----------------|----------------------|
| SAR1B    | GTP-binding protein SAR1b<br>gene:ENSG00000152700 /// GTP-binding protein SAR1b<br>gene:ENSG00000152700 /// GTP-binding protein SAR1b<br>gene:ENSG00000152700 /// Homo sapiens GTP binding protein mRNA, complete cds. /// Homo sapiens SAR1 homolog B (S. cerevisiae) (SAR1B), transcript variant 2, mRNA. /// Homo sapiens SAR1 homolog B (S. cerevisiae) (SAR1B), transcript variant 1, mRNA.          | SAR1 homolog B (S. cerevisiae)                                                                     | 0.007631<br>315 | -<br>1.149369<br>021 |
| GTPBP6   | Putative GTP-binding protein 6<br>gene:ENSG00000178605 /// Homo sapiens cDNA FLJ90047 fis, clone HEMBA1002316, highly similar to GTP-binding protein 6. /// Homo sapiens GTP binding protein 6 (putative) (GTPBP6), mRNA.                                                                                                                                                                                 | GTP binding protein 6 (putative)                                                                   | 0.000608<br>905 | 1.280156<br>717      |
| ERAL1    | Isoform HERA-A of GTP-binding protein era homolog<br>gene:ENSG00000132591 /// Homo sapiens cega mRNA for conserved ERA-like GTPase, complete cds. /// Homo sapiens Era G-protein-like 1 (E. coli) (ERAL1), mRNA.                                                                                                                                                                                          | Era G-protein-like 1 (E. coli)                                                                     | 0.007809<br>797 | 1.149173<br>663      |
| RHOU     | Isoform 1 of Rho-related GTP-binding protein RhoU<br>gene:ENSG00000116574 /// Homo sapiens CDC42-like GTPase (CDC42L1) mRNA, complete cds. /// Homo sapiens ras homolog gene family, member U (RHOU), mRNA.                                                                                                                                                                                               | ras homolog gene family, member U                                                                  | 0.006062<br>205 | 1.163299<br>791      |
| DYNC1LI1 | Cytoplasmic dynein 1 light intermediate chain 1<br>gene:ENSG00000144635 /// Homo sapiens zinc finger, RAN-binding domain containing 3, mRNA (cDNA clone IMAGE:5575956), complete cds. /// Homo sapiens dynein, cytoplasmic 1, light intermediate chain 1, mRNA (cDNA clone MGC:149683 IMAGE:40117391), complete cds. /// Homo sapiens dynein, cytoplasmic 1, light intermediate chain 1 (DYNC1LI1), mRNA. | zinc finger, RAN-binding domain containing 3 /// dynein, cytoplasmic 1, light intermediate chain 1 | 0.008493<br>891 | 1.164885<br>701      |

| Functional Group 52 | Transcript Description                                                                                                                                                                                                                                                                                                                                                                                                                                                                                                                         | Gene Title                                                                    | Bayes.In p  | Fold         |
|---------------------|------------------------------------------------------------------------------------------------------------------------------------------------------------------------------------------------------------------------------------------------------------------------------------------------------------------------------------------------------------------------------------------------------------------------------------------------------------------------------------------------------------------------------------------------|-------------------------------------------------------------------------------|-------------|--------------|
| PLEKHG6             | Isoform 1 of Pleckstrin homology domain-containing family G member 6 gene:ENSG0000008323 /// Isoform 2 of Pleckstrin homology domain-containing family G member 6 gene:ENSG0000008323 /// Isoform 3 of Pleckstrin homology domain-containing family G member 6 gene:ENSG0000008323 /// Homo sapiens cDNA FLJ10665 fis, clone NT2RP2006200. /// Homo sapiens pleckstrin homology domain containing, family G (with RhoGef domain) member 6 (PLEKHG6), mRNA.                                                                                     | pleckstrin homology domain containing, family G (with RhoGef domain) member 6 | 0.009513359 | 1.243652033  |
| TBC1D23             | Isoform 2 of TBC1 domain family member 23 gene:ENSG00000036054 /// Isoform 1 of TBC1 domain family member 23 gene:ENSG00000036054 /// Homo sapiens TBC1 domain family, member 23, mRNA (cDNA clone MGC:8800 IMAGE:3847561), complete cds. /// Homo sapiens TBC1 domain family, member 23 (TBC1D23), mRNA.                                                                                                                                                                                                                                      | TBC1 domain family, member 23                                                 | 1.49374E-05 | -1.287480855 |
| PLEKHG1             | Pleckstrin homology domain-containing family G member 1 gene:ENSG00000120278 /// Pleckstrin homology domain containing, family G (With RhoGef domain) member 1 gene:ENSG00000120278 /// Pleckstrin homology domain-containing family G member 1 gene:ENSG00000120278 /// Homo sapiens pleckstrin homology domain containing, family G (with RhoGef domain) member 1, mRNA (cDNA clone MGC:176541 IMAGE:9021732), complete cds. /// Homo sapiens pleckstrin homology domain containing, family G (with RhoGef domain) member 1 (PLEKHG1), mRNA. | pleckstrin homology domain containing, family G (with RhoGef domain) member 1 | 0.002992025 | -1.334100959 |



|      |                                                                                                                                                                                                                                                                                                                                                                                                                                                               |                                         |                 |                 |
|------|---------------------------------------------------------------------------------------------------------------------------------------------------------------------------------------------------------------------------------------------------------------------------------------------------------------------------------------------------------------------------------------------------------------------------------------------------------------|-----------------------------------------|-----------------|-----------------|
| PSD3 | Isoform 3 of PH and SEC7 domain-containing protein 3<br>gene:ENSG00000156011 /// Isoform 2 of PH and SEC7 domain-containing protein 3 gene:ENSG00000156011 /// Homo sapiens pleckstrin and Sec7 domain containing 3, mRNA (cDNA clone IMAGE:4153308), complete cds. /// Homo sapiens pleckstrin and Sec7 domain containing 3 (PSD3), transcript variant 1, mRNA. /// Homo sapiens pleckstrin and Sec7 domain containing 3 (PSD3), transcript variant 2, mRNA. | pleckstrin and Sec7 domain containing 3 | 0.856220<br>809 | 1.010476<br>812 |
|------|---------------------------------------------------------------------------------------------------------------------------------------------------------------------------------------------------------------------------------------------------------------------------------------------------------------------------------------------------------------------------------------------------------------------------------------------------------------|-----------------------------------------|-----------------|-----------------|
